# Supplementary material
Source: MDPI journal article supplement (https://www.mdpi.com/2073-4352/10/5/413)

## Supplementary Data

Figure S1. The  $^1\text{H}$ -NMR spectrum of the compound **4** (dimethylsulfoxide- $d_6$ , 400 MHz).

Figure S2. The  $^{13}\text{C}$ -NMR spectrum of the compound **4** (dimethylsulfoxide- $d_6$ , 100 MHz).

Figure S3. The  $^1\text{H}$ -NMR spectrum of the compound **6** (dimethylsulfoxide- $d_6$ , 400 MHz).

Figure S4. The  $^{13}\text{C}$ -NMR spectrum of the compound **6** (dimethylsulfoxide- $d_6$ , 100 MHz).

Figure S5. High resolution Mass Spectrum of compound **6**.

Figure S6. Optimized molecular structure with atom numbering of compound **6**.

Table S1. Bond lengths (Å) of compound **6**.

Table S2. Bond angles (°) of compound **6**

Table S3. Dihedral angles (°) of compound **6**

Table S4. NPA charge on the atoms of compound **6**.

Figure S7. Molecular orbital surfaces of selected MOs of compound **6** in vacuum (A) and in DMSO (B).

Figure S1. The  $^1\text{H}$ -NMR spectrum of the compound **4** (dimethylsulfoxide- $d_6$ , 400 MHz).

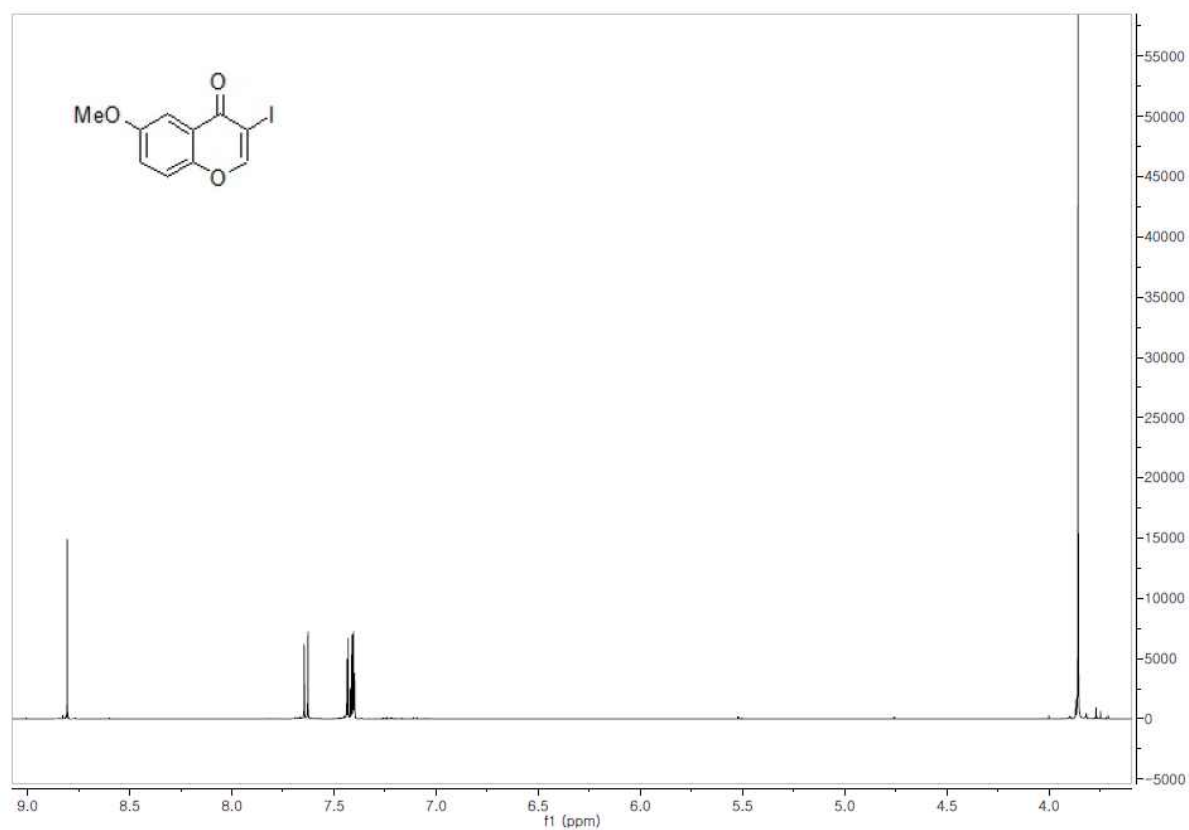

Figure S2. The  $^{13}\text{C}$ -NMR spectrum of the compound **4** (dimethylsulfoxide- $d_6$ , 100 MHz).

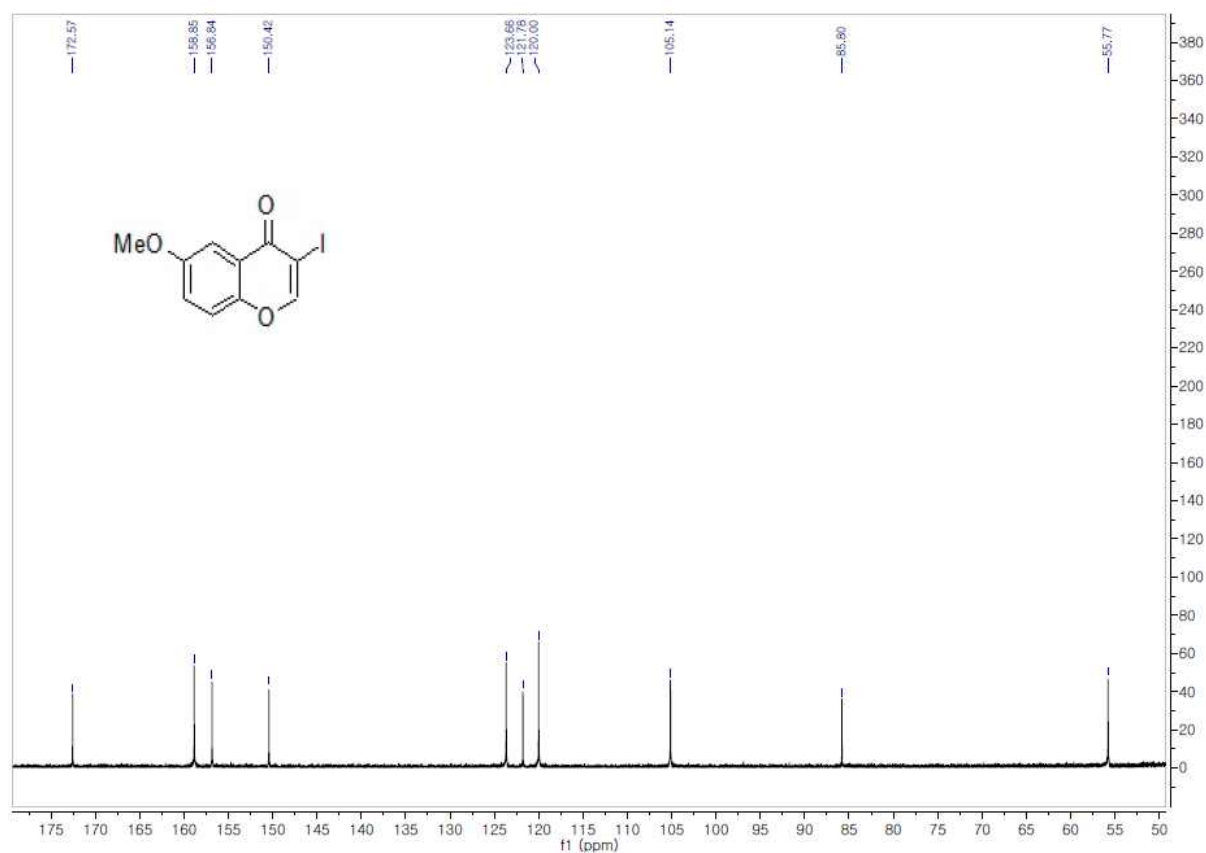

Figure S3. The  $^1\text{H}$ -NMR spectrum of the compound **6** (dimethylsulfoxide- $d_6$ , 400 MHz).

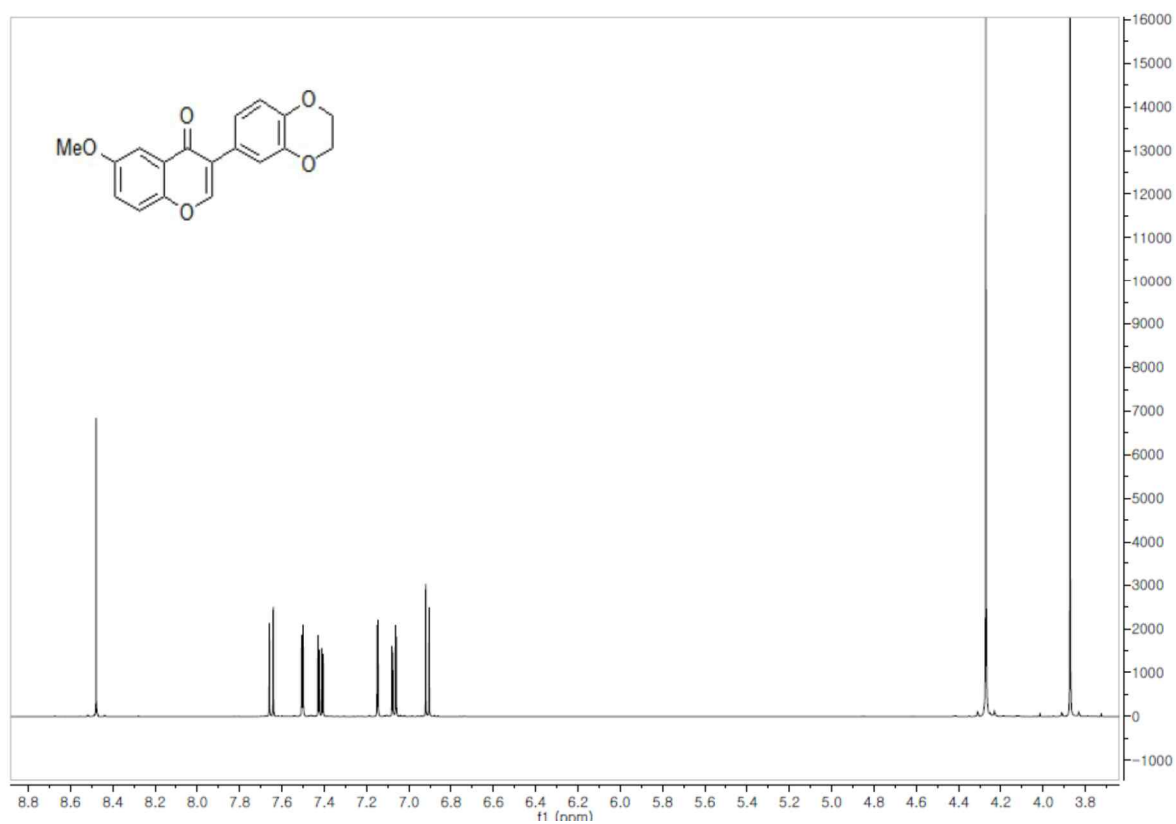

Figure S4. The  $^{13}\text{C}$ -NMR spectrum of the compound **6** (dimethylsulfoxide- $d_6$ , 100 MHz).

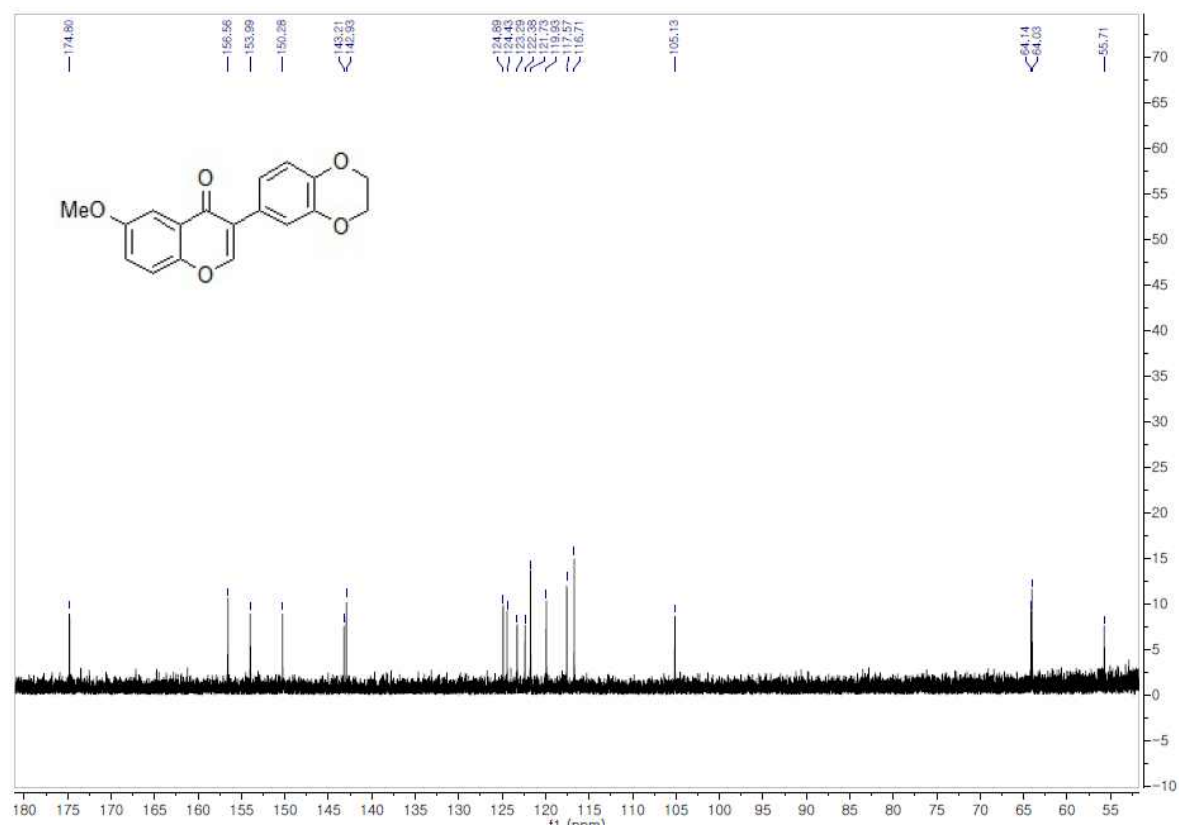

Figure S5. High resolution Mass Spectrum of compound **6**.

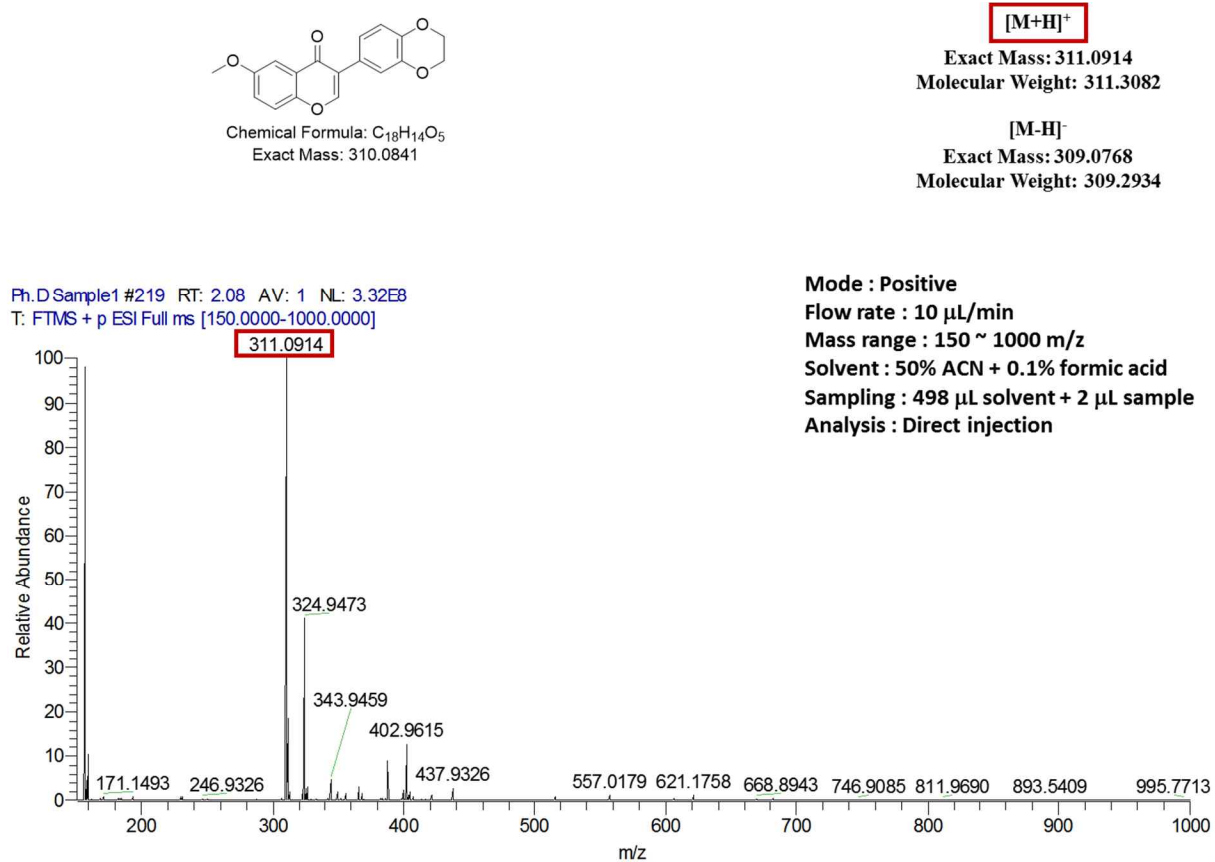

Figure S6. Optimized molecular structure with atom numbering of compound **6**.

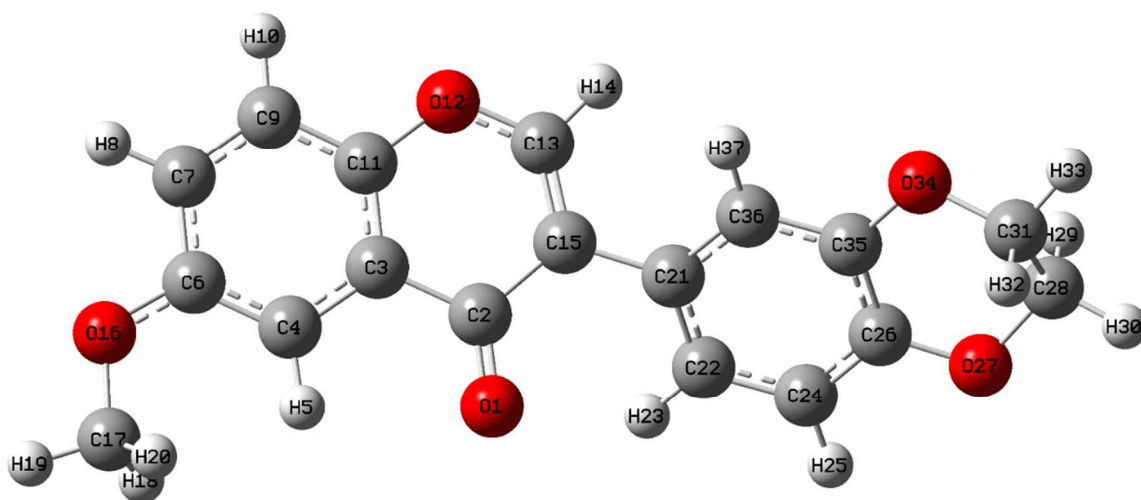

Table S1. Bond lengths (Å) of compound **6**.

| Geometric parameters | X-ray  | Calculation |        | Geometric parameters | X-ray  | Calculation |        |
|----------------------|--------|-------------|--------|----------------------|--------|-------------|--------|
|                      |        | vacuum      | DMSO   |                      |        | vacuum      | DMSO   |
| R(1,2)               | 1.2292 | 1.2263      | 1.2344 | R(15,21)             | 1.4893 | 1.4825      | 1.4846 |
| R(2,3)               | 1.4770 | 1.4806      | 1.4762 | R(16,17)             | 1.4250 | 1.424       | 1.4307 |
| R(2,15)              | 1.4630 | 1.4754      | 1.4683 | R(21,22)             | 1.4005 | 1.4043      | 1.4039 |
| R(3,4)               | 1.4049 | 1.4070      | 1.4087 | R(21,36)             | 1.3863 | 1.3995      | 1.3989 |
| R(3,11)              | 1.3859 | 1.3931      | 1.3950 | R(22,24)             | 1.3861 | 1.388       | 1.3891 |
| R(4,6)               | 1.3775 | 1.3858      | 1.3862 | R(24,26)             | 1.3877 | 1.3934      | 1.3948 |
| R(6,7)               | 1.4046 | 1.4114      | 1.4126 | R(26,27)             | 1.3759 | 1.3731      | 1.3708 |
| R(6,16)              | 1.3661 | 1.3620      | 1.3607 | R(26,35)             | 1.3961 | 1.4009      | 1.4025 |
| R(7,9)               | 1.3667 | 1.3787      | 1.3784 | R(27,28)             | 1.4400 | 1.4294      | 1.4381 |
| R(9,11)              | 1.3947 | 1.3993      | 1.3994 | R(28,31)             | 1.4899 | 1.5174      | 1.5143 |
| R(11,12)             | 1.3755 | 1.3701      | 1.3694 | R(31,34)             | 1.4367 | 1.4294      | 1.4377 |
| R(12,13)             | 1.3494 | 1.3482      | 1.3440 | R(34,35)             | 1.3721 | 1.3759      | 1.3726 |
| R(13,15)             | 1.3493 | 1.3561      | 1.3574 | R(35,36)             | 1.3875 | 1.3913      | 1.3933 |



Table S2. Bond angles (°) of compound **6**

| Geometric Parameters | X-ray    | Calculation |          | Geometric Parameters | X-ray    | Calculation |          |
|----------------------|----------|-------------|----------|----------------------|----------|-------------|----------|
|                      |          | vacuum      | DMSO     |                      |          | vacuum      | DMSO     |
| A(1,2,3)             | 121.8648 | 121.7015    | 121.7607 | A(13,15,21)          | 118.8496 | 119.6280    | 119.4680 |
| A(1,2,15)            | 123.8063 | 123.8876    | 123.5074 | A(6,16,17)           | 117.1009 | 118.1838    | 118.3373 |
| A(3,2,15)            | 114.3289 | 114.4103    | 114.7284 | A(15,21,22)          | 120.7945 | 121.3677    | 121.1824 |
| A(2,3,4)             | 120.7133 | 120.2757    | 120.7552 | A(15,21,36)          | 120.3565 | 120.1609    | 120.2580 |
| A(2,3,11)            | 120.3787 | 120.5781    | 120.2251 | A(22,21,36)          | 118.7523 | 118.4673    | 118.5522 |
| A(4,3,11)            | 118.8985 | 119.1459    | 119.0182 | A(21,22,24)          | 120.2779 | 120.5053    | 120.5250 |
| A(3,4,6)             | 119.7066 | 120.0296    | 120.0343 | A(22,24,26)          | 120.5706 | 120.6884    | 120.6644 |
| A(4,6,7)             | 120.1745 | 119.8527    | 119.861  | A(24,26,27)          | 118.6301 | 118.6835    | 118.6757 |
| A(4,6,16)            | 124.9622 | 124.9269    | 124.8516 | A(24,26,35)          | 119.3364 | 119.3260    | 119.3059 |
| A(7,6,16)            | 114.8629 | 115.2204    | 115.2874 | A(27,26,35)          | 122.0335 | 121.9786    | 122.0126 |
| A(6,7,9)             | 120.7909 | 120.6298    | 120.6792 | A(26,27,28)          | 113.2887 | 114.0182    | 114.1073 |
| A(7,9,11)            | 118.7844 | 119.1336    | 119.0796 | A(27,28,31)          | 110.6314 | 110.2612    | 110.1692 |
| A(3,11,9)            | 121.6300 | 121.2082    | 121.3277 | A(28,31,34)          | 110.2419 | 110.1749    | 110.1490 |
| A(3,11,12)           | 122.0288 | 121.5628    | 121.5737 | A(31,34,35)          | 112.8593 | 113.6936    | 113.9220 |
| A(9,11,12)           | 116.3403 | 117.2283    | 117.0985 | A(26,35,34)          | 122.2627 | 121.8329    | 121.8617 |
| A(11,12,13)          | 117.8290 | 118.6579    | 118.9153 | A(26,35,36)          | 119.8240 | 119.8710    | 119.8288 |
| A(12,13,15)          | 125.8353 | 125.9324    | 125.4834 | A(34,35,36)          | 117.8992 | 118.2958    | 118.3095 |
| A(2,15,13)           | 119.4507 | 118.7982    | 119.0678 | A(21,36,35)          | 121.0950 | 121.1054    | 121.1011 |
| A(2,15,21)           | 121.6959 | 121.5738    | 121.4616 |                      |          |             |          |

Table S3. Dihedral angles (°) of compound **6**

| Geometric Parameters | X-ray     | Calculation |           | Geometric Parameters | X-ray     | Calculation |           |
|----------------------|-----------|-------------|-----------|----------------------|-----------|-------------|-----------|
|                      |           | vacuum      | DMSO      |                      |           | vacuum      | DMSO      |
| D(1,2,3,4)           | -4.2771   | 1.4182      | -0.3955   | D(12,13,15,2)        | -0.3771   | 2.4396      | 0.9534    |
| D(1,2,3,11)          | 176.8544  | -178.7862   | 179.1459  | D(12,13,15,21)       | 178.9230  | -177.6270   | -178.4775 |
| D(15,2,3,4)          | 175.7952  | -178.2956   | -179.7417 | D(2,15,21,22)        | 49.3755   | 42.4779     | 49.5214   |
| D(15,2,3,11)         | -3.0732   | 1.5000      | -0.2003   | D(2,15,21,36)        | -134.2450 | -138.2763   | -131.4760 |
| D(1,2,15,13)         | -176.6634 | 177.5041    | -179.7730 | D(13,15,21,22)       | -129.9082 | -137.4535   | -131.0618 |
| D(1,2,15,21)         | 4.0571    | -2.4279     | -0.3538   | D(13,15,21,36)       | 46.4713   | 41.7922     | 47.9409   |
| D(3,2,15,13)         | 3.2627    | -2.7892     | -0.4396   | D(15,21,22,24)       | 173.2024  | 177.3507    | 177.5833  |
| D(3,2,15,21)         | -176.0168 | 177.2788    | 178.9795  | D(36,21,22,24)       | -3.2343   | -1.9075     | -1.4360   |
| D(2,3,4,6)           | -178.4703 | 179.8215    | 179.6802  | D(15,21,36,35)       | -175.2673 | -177.7442   | -178.0390 |
| D(11,3,4,6)          | 0.4146    | 0.0230      | 0.1334    | D(22,21,36,35)       | 1.1854    | 1.5232      | 0.9896    |
| D(2,3,11,9)          | 179.6292  | -179.9404   | -179.6731 | D(21,22,24,26)       | 1.7727    | 0.6215      | 0.5207    |
| D(2,3,11,12)         | 0.0002    | 0.3739      | 0.4242    | D(22,24,26,27)       | -178.2569 | 179.8507    | -179.9988 |
| D(4,3,11,9)          | 0.7404    | -0.1425     | -0.1238   | D(22,24,26,35)       | 1.7616    | 1.0822      | 0.8614    |
| D(4,3,11,12)         | -178.8886 | -179.8282   | 179.9735  | D(24,26,27,28)       | 167.2632  | 166.0754    | 165.5555  |
| D(3,4,6,7)           | -1.0104   | 0.0811      | -0.0865   | D(35,26,27,28)       | -12.7558  | -15.1905    | -15.3291  |
| D(3,4,6,16)          | 179.2042  | -179.9772   | 179.8993  | D(24,26,35,34)       | 177.5991  | 178.3477    | 178.7352  |
| D(4,6,7,9)           | 0.4672    | -0.0690     | 0.0278    | D(24,26,35,36)       | -3.7940   | -1.4640     | -1.3023   |
| D(16,6,7,9)          | -179.7267 | 179.9838    | -179.9594 | D(27,26,35,34)       | -2.3818   | -0.3786     | -0.3748   |
| D(4,6,16,17)         | -5.7978   | -0.0149     | 0.0138    | D(27,26,35,36)       | 176.2252  | 179.8097    | 179.5877  |
| D(7,6,16,17)         | 174.4067  | 179.9293    | -179.9998 | D(26,27,28,31)       | 43.8989   | 44.5697     | 44.6684   |
| D(6,7,9,11)          | 0.6666    | -0.0478     | -0.0165   | D(27,28,31,34)       | -62.4032  | -61.2522    | -60.8167  |
| D(7,9,11,3)          | -1.2793   | 0.1548      | 0.0658    | D(28,31,34,35)       | 46.8129   | 45.8782     | 45.5193   |
| D(7,9,11,12)         | 178.3698  | 179.8536    | 179.9727  | D(31,34,35,26)       | -15.8245  | -16.5440    | -16.1855  |
| D(3,11,12,13)        | 3.0264    | -1.0184     | 0.0145    | D(31,34,35,36)       | 165.5430  | 163.2706    | 163.8514  |
| D(9,11,12,13)        | -176.6211 | 179.2839    | -179.8921 | D(26,35,36,21)       | 2.3277    | 0.1522      | 0.3738    |
| D(11,12,13,15)       | -2.9046   | -0.4474     | -0.7407   | D(34,35,36,21)       | -179.0052 | -179.6661   | -179.6624 |

Table S4. NPA charge on the atoms of compound **6**.

| Atom | Charge   | Atom | Charge   |
|------|----------|------|----------|
| O1   | -0.59255 | H20  | 0.17345  |
| C2   | 0.50307  | C21  | -0.04958 |
| C3   | -0.15992 | C22  | -0.18082 |
| C4   | -0.23688 | H23  | 0.22507  |
| H5   | 0.23862  | C24  | -0.22232 |
| C6   | 0.31451  | H25  | 0.21851  |
| C7   | -0.19783 | C26  | 0.25378  |
| H8   | 0.22206  | O27  | -0.54652 |
| C9   | -0.21801 | C28  | -0.05046 |
| H10  | 0.22333  | H29  | 0.17590  |
| C11  | 0.30994  | H30  | 0.19623  |
| O12  | -0.47240 | C31  | -0.05082 |
| C13  | 0.23360  | H32  | 0.17692  |
| H14  | 0.19585  | H33  | 0.19595  |
| C15  | -0.18767 | O34  | -0.55010 |
| O16  | -0.54062 | C35  | 0.25023  |
| C17  | -0.20603 | C36  | -0.22493 |
| H18  | 0.17326  | H37  | 0.21507  |
| H19  | 0.19209  |      |          |

Figure S7. Molecular orbital surfaces of selected MOs of compound **6** in vacuum (A) and in DMSO (B).

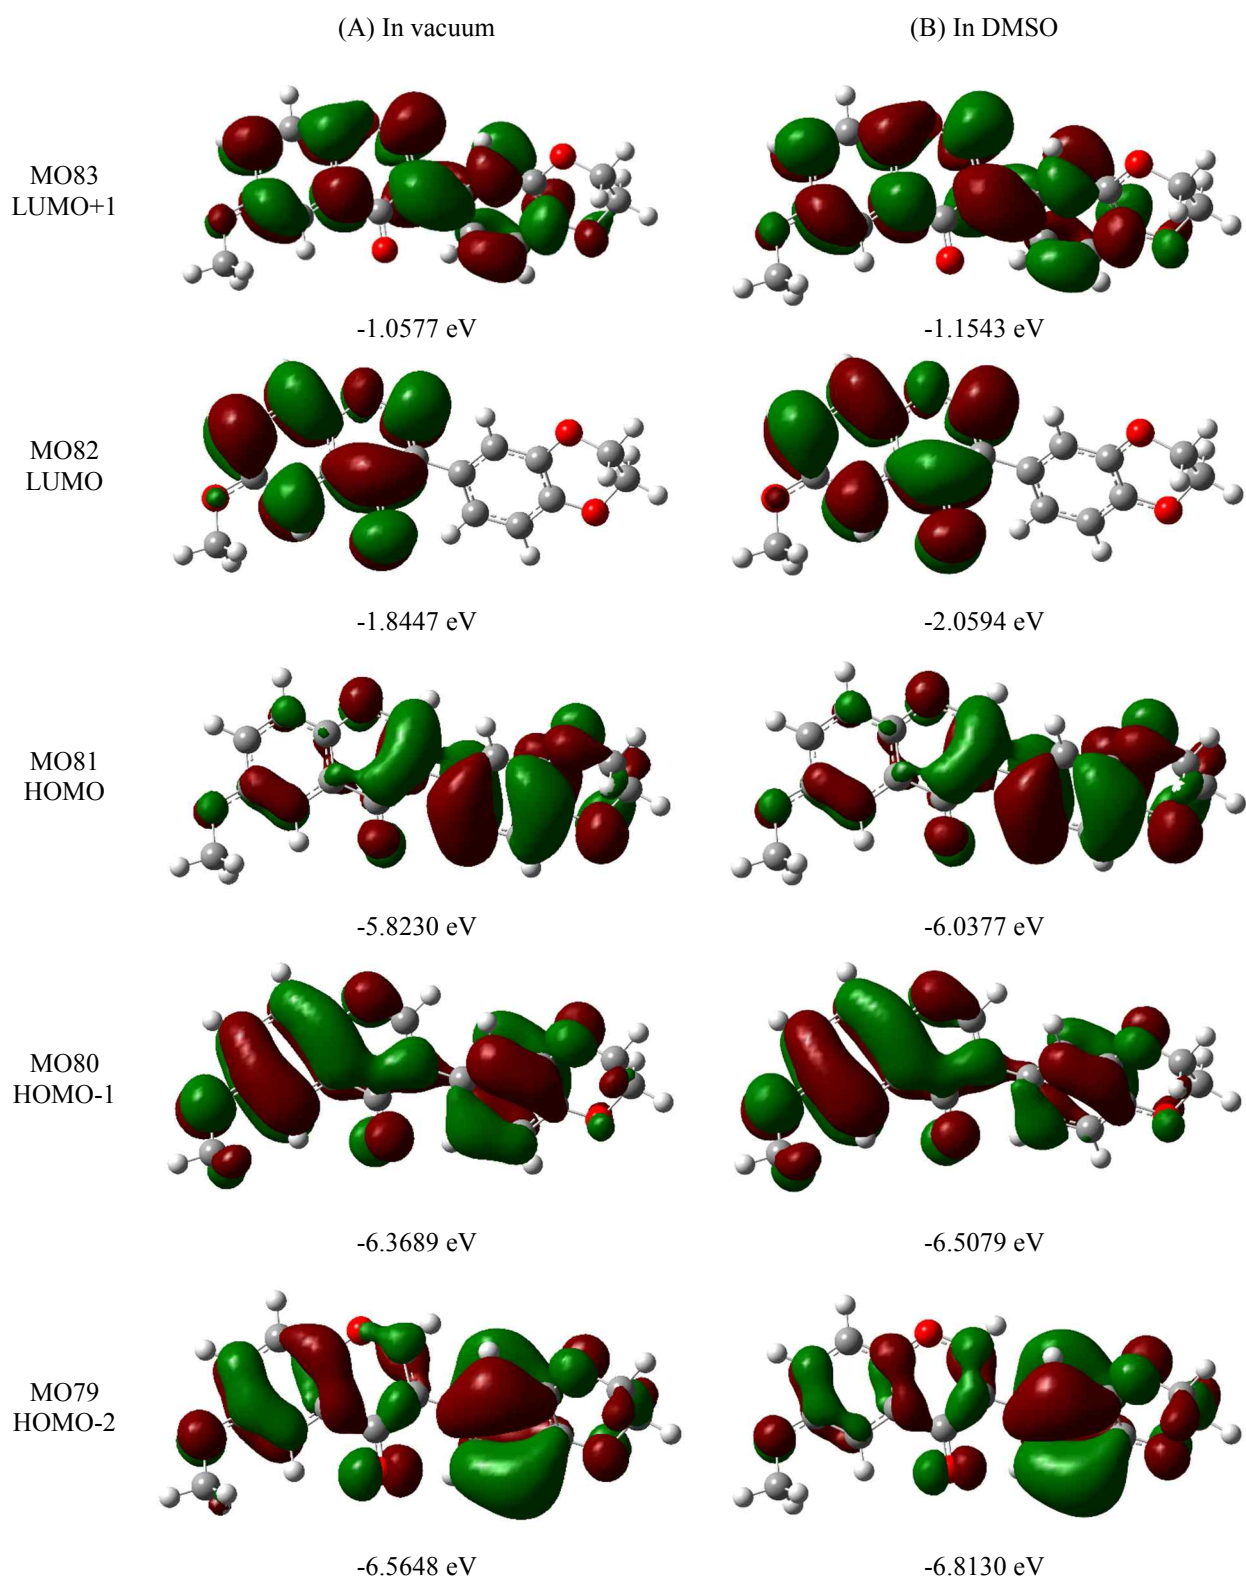

Supplement: s1 [file s1]
