# Supplementary material
Source: MDPI journal article supplement (https://www.mdpi.com/2073-4352/10/5/413)
Supplement: s1 [file s1]

Archive with 3 entries (3 files):
- Supplementary files/checkcif report.pdf
- Supplementary files/CIF.cif
- Supplementary files/revised-supplementary data final.pdf
