# Supplementary material
Source: MDPI journal article supplement (https://www.mdpi.com/2073-4352/10/5/413)
Supplement: s1 [file s1 › Supplementary files/CIF.cif]

 
data_DK3308 
  
_audit_creation_method            'SHELXL-2014/7' 
_shelx_SHELXL_version_number      '2014/7' 
_chemical_name_systematic         ? 
_chemical_name_common             ? 
_chemical_melting_point           ? 
_chemical_formula_moiety          'C18 H14 O5'
_chemical_formula_sum 
 'C18 H14 O5' 
_chemical_formula_weight          310.29 
  
loop_ 
 _atom_type_symbol 
 _atom_type_description 
 _atom_type_scat_dispersion_real 
 _atom_type_scat_dispersion_imag 
 _atom_type_scat_source 
 'C'  'C'   0.0033   0.0016 
 'International Tables Vol C Tables 4.2.6.8 and 6.1.1.4' 
 'H'  'H'   0.0000   0.0000 
 'International Tables Vol C Tables 4.2.6.8 and 6.1.1.4' 
 'O'  'O'   0.0106   0.0060 
 'International Tables Vol C Tables 4.2.6.8 and 6.1.1.4' 
  
_space_group_crystal_system       monoclinic 
_space_group_IT_number            14 
_space_group_name_H-M_alt         'P 21/n' 
_space_group_name_Hall            '-P 2yn' 
  
_shelx_space_group_comment 
; 
The symmetry employed for this shelxl refinement is uniquely defined 
by the following loop, which should always be used as a source of 
symmetry information in preference to the above space-group names. 
They are only intended as comments. 
; 
  
loop_ 
 _space_group_symop_operation_xyz 
 'x, y, z' 
 '-x+1/2, y+1/2, -z+1/2' 
 '-x, -y, -z' 
 'x-1/2, -y-1/2, z-1/2' 
  
_cell_length_a                    7.1869(4) 
_cell_length_b                    10.2764(6) 
_cell_length_c                    19.6771(10) 
_cell_angle_alpha                 90 
_cell_angle_beta                  99.442(2) 
_cell_angle_gamma                 90 
_cell_volume                      1433.57(14) 
_cell_formula_units_Z             4 
_cell_measurement_temperature     223(2) 
_cell_measurement_reflns_used     9839 
_cell_measurement_theta_min       2.24 
_cell_measurement_theta_max       28.00 
  
_exptl_crystal_description        Rod 
_exptl_crystal_colour             colourless 
_exptl_crystal_density_meas       ? 
_exptl_crystal_density_method     ? 
_exptl_crystal_density_diffrn     1.438 
_exptl_crystal_F_000              648 
_exptl_transmission_factor_min    ? 
_exptl_transmission_factor_max    ? 
_exptl_crystal_size_max           0.190 
_exptl_crystal_size_mid           0.150 
_exptl_crystal_size_min           0.100 
_exptl_absorpt_coefficient_mu     0.106 
_shelx_estimated_absorpt_T_min    0.980 
_shelx_estimated_absorpt_T_max    0.990 
_exptl_absorpt_correction_type    Multi-scan 
_exptl_absorpt_correction_T_min   0.6970 
_exptl_absorpt_correction_T_max   0.7457 
_exptl_absorpt_process_details    'Bruker SADABS'
_exptl_absorpt_special_details    ? 
_diffrn_ambient_temperature       223(2) 
_diffrn_radiation_wavelength      0.71073 
_diffrn_radiation_type            MoK\a 
_diffrn_source                    ? 
_diffrn_measurement_device_type   'PHOTON 100 CMOS' 
_diffrn_measurement_method        '\f and \w scans' 
_diffrn_detector_area_resol_mean  ? 
_diffrn_reflns_number             39243 
_diffrn_reflns_av_unetI/netI      0.0208 
_diffrn_reflns_av_R_equivalents   0.0491 
_diffrn_reflns_limit_h_min        -9 
_diffrn_reflns_limit_h_max        9 
_diffrn_reflns_limit_k_min        -13 
_diffrn_reflns_limit_k_max        13 
_diffrn_reflns_limit_l_min        -26 
_diffrn_reflns_limit_l_max        26 
_diffrn_reflns_theta_min          2.098 
_diffrn_reflns_theta_max          28.296 
_diffrn_reflns_theta_full         25.242 
_diffrn_measured_fraction_theta_max   1.000 
_diffrn_measured_fraction_theta_full  1.000 
_diffrn_reflns_Laue_measured_fraction_max    1.000 
_diffrn_reflns_Laue_measured_fraction_full   1.000 
_diffrn_reflns_point_group_measured_fraction_max   1.000 
_diffrn_reflns_point_group_measured_fraction_full  1.000 
_reflns_number_total              3573 
_reflns_number_gt                 2730 
_reflns_threshold_expression      'I > 2\s(I)' 
_reflns_Friedel_coverage          0.000 
_reflns_Friedel_fraction_max      . 
_reflns_Friedel_fraction_full     . 
  
_reflns_special_details 
; 
 Reflections were merged by SHELXL according to the crystal 
 class for the calculation of statistics and refinement. 
  
 _reflns_Friedel_fraction is defined as the number of unique 
 Friedel pairs measured divided by the number that would be 
 possible theoretically, ignoring centric projections and 
 systematic absences. 
; 
  
_computing_data_collection        'Bruker APEX2' 
_computing_cell_refinement        'Bruker SAINT' 
_computing_data_reduction         'Bruker SAINT' 
_computing_structure_solution     'Bruker SHELXTL' 
_computing_structure_refinement 'SHELXL-2014/7 (Sheldrick, 2014)' 
_computing_molecular_graphics     'Bruker SHELXTL' 
_computing_publication_material   'Bruker SHELXTL' 
_refine_special_details           ? 
_refine_ls_structure_factor_coef  Fsqd 
_refine_ls_matrix_type            full 
_refine_ls_weighting_scheme       calc 
_refine_ls_weighting_details 
'w=1/[\s^2^(Fo^2^)+(0.0489P)^2^+0.5097P] where P=(Fo^2^+2Fc^2^)/3' 
_atom_sites_solution_primary      ? 
_atom_sites_solution_secondary    ? 
_atom_sites_solution_hydrogens    geom 
_refine_ls_hydrogen_treatment     constr 
_refine_ls_extinction_method      none 
_refine_ls_extinction_coef        . 
_refine_ls_number_reflns          3573 
_refine_ls_number_parameters      209 
_refine_ls_number_restraints      0 
_refine_ls_R_factor_all           0.0577 
_refine_ls_R_factor_gt            0.0396 
_refine_ls_wR_factor_ref          0.1083 
_refine_ls_wR_factor_gt           0.0990 
_refine_ls_goodness_of_fit_ref    1.039 
_refine_ls_restrained_S_all       1.039 
_refine_ls_shift/su_max           0.000 
_refine_ls_shift/su_mean          0.000 
  
loop_ 
 _atom_site_label 
 _atom_site_type_symbol 
 _atom_site_fract_x 
 _atom_site_fract_y 
 _atom_site_fract_z 
 _atom_site_U_iso_or_equiv 
 _atom_site_adp_type 
 _atom_site_occupancy 
 _atom_site_site_symmetry_order 
 _atom_site_calc_flag 
 _atom_site_refinement_flags_posn 
 _atom_site_refinement_flags_adp 
 _atom_site_refinement_flags_occupancy 
 _atom_site_disorder_assembly 
 _atom_site_disorder_group 
O1 O 0.38006(15) 0.95289(10) 0.15345(5) 0.0355(3) Uani 1 1 d . . . . . 
C1 C 0.34372(18) 0.91500(13) 0.09352(6) 0.0247(3) Uani 1 1 d . . . . . 
C2 C 0.27376(17) 1.00442(13) 0.03620(6) 0.0234(3) Uani 1 1 d . . . . . 
C3 C 0.23456(18) 1.13520(13) 0.04910(7) 0.0260(3) Uani 1 1 d . . . . . 
H3 H 0.2555 1.1674 0.0944 0.031 Uiso 1 1 calc R U . . . 
C4 C 0.16533(18) 1.21610(13) -0.00498(7) 0.0275(3) Uani 1 1 d . . . . . 
C5 C 0.13686(19) 1.16856(14) -0.07285(7) 0.0300(3) Uani 1 1 d . . . . . 
H5 H 0.0904 1.2246 -0.1095 0.036 Uiso 1 1 calc R U . . . 
C6 C 0.17591(19) 1.04193(14) -0.08625(7) 0.0291(3) Uani 1 1 d . . . . . 
H6 H 0.1580 1.0106 -0.1317 0.035 Uiso 1 1 calc R U . . . 
C7 C 0.24292(17) 0.95991(13) -0.03115(7) 0.0252(3) Uani 1 1 d . . . . . 
O2 O 0.27514(14) 0.83254(10) -0.04747(5) 0.0311(2) Uani 1 1 d . . . . . 
C8 C 0.33059(19) 0.74912(14) 0.00492(7) 0.0280(3) Uani 1 1 d . . . . . 
H8 H 0.3466 0.6616 -0.0067 0.034 Uiso 1 1 calc R U . . . 
C9 C 0.36514(17) 0.78000(13) 0.07246(6) 0.0240(3) Uani 1 1 d . . . . . 
O3 O 0.11999(16) 1.34412(10) 0.00123(5) 0.0370(3) Uani 1 1 d . . . . . 
C10 C 0.1296(2) 1.39410(15) 0.06928(8) 0.0398(4) Uani 1 1 d . . . . . 
H10A H 0.0499 1.3424 0.0941 0.060 Uiso 1 1 calc R U . . . 
H10B H 0.0866 1.4837 0.0670 0.060 Uiso 1 1 calc R U . . . 
H10C H 0.2589 1.3903 0.0930 0.060 Uiso 1 1 calc R U . . . 
C11 C 0.42209(18) 0.67499(12) 0.12373(6) 0.0244(3) Uani 1 1 d . . . . . 
C12 C 0.33074(19) 0.65973(14) 0.18086(7) 0.0286(3) Uani 1 1 d . . . . . 
H12 H 0.2416 0.7217 0.1898 0.034 Uiso 1 1 calc R U . . . 
C13 C 0.3711(2) 0.55373(14) 0.22433(7) 0.0309(3) Uani 1 1 d . . . . . 
H13 H 0.3066 0.5430 0.2618 0.037 Uiso 1 1 calc R U . . . 
C14 C 0.50602(19) 0.46324(13) 0.21291(6) 0.0275(3) Uani 1 1 d . . . . . 
O4 O 0.53790(16) 0.35755(10) 0.25620(5) 0.0389(3) Uani 1 1 d . . . . . 
C15 C 0.6488(3) 0.25736(16) 0.23083(8) 0.0457(4) Uani 1 1 d . . . . . 
H15A H 0.5696 0.2082 0.1944 0.055 Uiso 1 1 calc R U . . . 
H15B H 0.6956 0.1969 0.2683 0.055 Uiso 1 1 calc R U . . . 
C16 C 0.8112(2) 0.31524(17) 0.20319(8) 0.0440(4) Uani 1 1 d . . . . . 
H16A H 0.8895 0.3656 0.2394 0.053 Uiso 1 1 calc R U . . . 
H16B H 0.8891 0.2457 0.1885 0.053 Uiso 1 1 calc R U . . . 
O5 O 0.74452(15) 0.39856(10) 0.14567(5) 0.0375(3) Uani 1 1 d . . . . . 
C17 C 0.60484(18) 0.48182(13) 0.15826(6) 0.0259(3) Uani 1 1 d . . . . . 
C18 C 0.55981(18) 0.58584(13) 0.11367(6) 0.0253(3) Uani 1 1 d . . . . . 
H18 H 0.6237 0.5961 0.0760 0.030 Uiso 1 1 calc R U . . . 
  
loop_ 
 _atom_site_aniso_label 
 _atom_site_aniso_U_11 
 _atom_site_aniso_U_22 
 _atom_site_aniso_U_33 
 _atom_site_aniso_U_23 
 _atom_site_aniso_U_13 
 _atom_site_aniso_U_12 
O1 0.0529(6) 0.0314(6) 0.0208(5) -0.0014(4) 0.0021(4) 0.0068(5) 
C1 0.0246(6) 0.0274(7) 0.0225(6) 0.0018(5) 0.0048(5) 0.0021(5) 
C2 0.0214(6) 0.0255(7) 0.0234(6) 0.0024(5) 0.0042(5) 0.0001(5) 
C3 0.0276(6) 0.0251(7) 0.0252(6) 0.0009(5) 0.0045(5) -0.0011(5) 
C4 0.0261(6) 0.0229(7) 0.0335(7) 0.0040(5) 0.0049(5) -0.0013(5) 
C5 0.0320(7) 0.0295(7) 0.0272(7) 0.0089(6) 0.0009(5) -0.0011(6) 
C6 0.0312(7) 0.0334(8) 0.0218(6) 0.0022(5) 0.0016(5) -0.0019(6) 
C7 0.0247(6) 0.0254(7) 0.0253(6) 0.0006(5) 0.0039(5) 0.0004(5) 
O2 0.0426(6) 0.0282(5) 0.0211(4) -0.0008(4) 0.0013(4) 0.0055(4) 
C8 0.0331(7) 0.0239(7) 0.0261(6) -0.0003(5) 0.0022(5) 0.0034(5) 
C9 0.0238(6) 0.0241(7) 0.0240(6) 0.0019(5) 0.0041(5) 0.0022(5) 
O3 0.0495(6) 0.0239(5) 0.0365(6) 0.0047(4) 0.0038(5) 0.0056(4) 
C10 0.0465(9) 0.0275(8) 0.0433(9) -0.0047(6) 0.0010(7) 0.0033(6) 
C11 0.0281(6) 0.0221(6) 0.0224(6) -0.0004(5) 0.0020(5) -0.0011(5) 
C12 0.0307(7) 0.0292(7) 0.0264(6) -0.0017(5) 0.0060(5) 0.0035(5) 
C13 0.0374(7) 0.0334(8) 0.0231(6) 0.0017(5) 0.0082(5) -0.0008(6) 
C14 0.0367(7) 0.0251(7) 0.0192(6) 0.0020(5) -0.0001(5) -0.0016(5) 
O4 0.0585(7) 0.0311(6) 0.0271(5) 0.0091(4) 0.0073(5) 0.0071(5) 
C15 0.0696(12) 0.0302(8) 0.0355(8) 0.0075(6) 0.0030(8) 0.0124(8) 
C16 0.0555(10) 0.0407(9) 0.0331(8) 0.0042(7) -0.0010(7) 0.0198(8) 
O5 0.0473(6) 0.0347(6) 0.0310(5) 0.0052(4) 0.0076(4) 0.0177(5) 
C17 0.0295(7) 0.0240(7) 0.0230(6) -0.0028(5) 0.0009(5) 0.0020(5) 
C18 0.0283(6) 0.0256(7) 0.0222(6) 0.0003(5) 0.0046(5) -0.0007(5) 
  
_geom_special_details 
; 
 All esds (except the esd in the dihedral angle between two l.s. planes) 
 are estimated using the full covariance matrix.  The cell esds are taken 
 into account individually in the estimation of esds in distances, angles 
 and torsion angles; correlations between esds in cell parameters are only 
 used when they are defined by crystal symmetry.  An approximate (isotropic) 
 treatment of cell esds is used for estimating esds involving l.s. planes. 
; 
  
loop_ 
 _geom_bond_atom_site_label_1 
 _geom_bond_atom_site_label_2 
 _geom_bond_distance 
 _geom_bond_site_symmetry_2 
 _geom_bond_publ_flag 
O1 C1 1.2286(15) . ? 
C1 C9 1.4632(18) . ? 
C1 C2 1.4776(17) . ? 
C2 C7 1.3851(18) . ? 
C2 C3 1.4048(19) . ? 
C3 C4 1.3775(18) . ? 
C3 H3 0.9400 . ? 
C4 O3 1.3656(17) . ? 
C4 C5 1.4052(19) . ? 
C5 C6 1.366(2) . ? 
C5 H5 0.9400 . ? 
C6 C7 1.3951(18) . ? 
C6 H6 0.9400 . ? 
C7 O2 1.3764(16) . ? 
O2 C8 1.3497(16) . ? 
C8 C9 1.3491(18) . ? 
C8 H8 0.9400 . ? 
C9 C11 1.4881(17) . ? 
O3 C10 1.4252(18) . ? 
C10 H10A 0.9700 . ? 
C10 H10B 0.9700 . ? 
C10 H10C 0.9700 . ? 
C11 C18 1.3865(18) . ? 
C11 C12 1.4004(18) . ? 
C12 C13 1.3860(19) . ? 
C12 H12 0.9400 . ? 
C13 C14 1.388(2) . ? 
C13 H13 0.9400 . ? 
C14 O4 1.3762(16) . ? 
C14 C17 1.3957(18) . ? 
O4 C15 1.4404(19) . ? 
C15 C16 1.490(3) . ? 
C15 H15A 0.9800 . ? 
C15 H15B 0.9800 . ? 
C16 O5 1.4374(17) . ? 
C16 H16A 0.9800 . ? 
C16 H16B 0.9800 . ? 
O5 C17 1.3722(16) . ? 
C17 C18 1.3871(18) . ? 
C18 H18 0.9400 . ? 
  
loop_ 
 _geom_angle_atom_site_label_1 
 _geom_angle_atom_site_label_2 
 _geom_angle_atom_site_label_3 
 _geom_angle 
 _geom_angle_site_symmetry_1 
 _geom_angle_site_symmetry_3 
 _geom_angle_publ_flag 
O1 C1 C9 123.83(12) . . ? 
O1 C1 C2 121.85(12) . . ? 
C9 C1 C2 114.32(11) . . ? 
C7 C2 C3 118.91(12) . . ? 
C7 C2 C1 120.40(12) . . ? 
C3 C2 C1 120.68(11) . . ? 
C4 C3 C2 119.70(12) . . ? 
C4 C3 H3 120.1 . . ? 
C2 C3 H3 120.1 . . ? 
O3 C4 C3 125.00(12) . . ? 
O3 C4 C5 114.86(12) . . ? 
C3 C4 C5 120.15(13) . . ? 
C6 C5 C4 120.81(12) . . ? 
C6 C5 H5 119.6 . . ? 
C4 C5 H5 119.6 . . ? 
C5 C6 C7 118.76(12) . . ? 
C5 C6 H6 120.6 . . ? 
C7 C6 H6 120.6 . . ? 
O2 C7 C2 122.04(11) . . ? 
O2 C7 C6 116.30(11) . . ? 
C2 C7 C6 121.65(12) . . ? 
C8 O2 C7 117.76(10) . . ? 
C9 C8 O2 125.91(13) . . ? 
C9 C8 H8 117.0 . . ? 
O2 C8 H8 117.0 . . ? 
C8 C9 C1 119.41(12) . . ? 
C8 C9 C11 118.88(12) . . ? 
C1 C9 C11 121.71(11) . . ? 
C4 O3 C10 117.11(11) . . ? 
O3 C10 H10A 109.5 . . ? 
O3 C10 H10B 109.5 . . ? 
H10A C10 H10B 109.5 . . ? 
O3 C10 H10C 109.5 . . ? 
H10A C10 H10C 109.5 . . ? 
H10B C10 H10C 109.5 . . ? 
C18 C11 C12 118.70(12) . . ? 
C18 C11 C9 120.38(11) . . ? 
C12 C11 C9 120.82(12) . . ? 
C13 C12 C11 120.34(13) . . ? 
C13 C12 H12 119.8 . . ? 
C11 C12 H12 119.8 . . ? 
C12 C13 C14 120.50(12) . . ? 
C12 C13 H13 119.7 . . ? 
C14 C13 H13 119.7 . . ? 
O4 C14 C13 118.57(12) . . ? 
O4 C14 C17 122.06(12) . . ? 
C13 C14 C17 119.36(12) . . ? 
C14 O4 C15 113.27(11) . . ? 
O4 C15 C16 110.63(14) . . ? 
O4 C15 H15A 109.5 . . ? 
C16 C15 H15A 109.5 . . ? 
O4 C15 H15B 109.5 . . ? 
C16 C15 H15B 109.5 . . ? 
H15A C15 H15B 108.1 . . ? 
O5 C16 C15 110.19(13) . . ? 
O5 C16 H16A 109.6 . . ? 
C15 C16 H16A 109.6 . . ? 
O5 C16 H16B 109.6 . . ? 
C15 C16 H16B 109.6 . . ? 
H16A C16 H16B 108.1 . . ? 
C17 O5 C16 112.87(11) . . ? 
O5 C17 C18 117.91(12) . . ? 
O5 C17 C14 122.25(12) . . ? 
C18 C17 C14 119.83(12) . . ? 
C11 C18 C17 121.12(12) . . ? 
C11 C18 H18 119.4 . . ? 
C17 C18 H18 119.4 . . ? 
  
loop_ 
 _geom_torsion_atom_site_label_1 
 _geom_torsion_atom_site_label_2 
 _geom_torsion_atom_site_label_3 
 _geom_torsion_atom_site_label_4 
 _geom_torsion 
 _geom_torsion_site_symmetry_1 
 _geom_torsion_site_symmetry_2 
 _geom_torsion_site_symmetry_3 
 _geom_torsion_site_symmetry_4 
 _geom_torsion_publ_flag 
O1 C1 C2 C7 176.82(13) . . . . ? 
C9 C1 C2 C7 -3.15(17) . . . . ? 
O1 C1 C2 C3 -4.21(19) . . . . ? 
C9 C1 C2 C3 175.82(11) . . . . ? 
C7 C2 C3 C4 0.47(19) . . . . ? 
C1 C2 C3 C4 -178.51(12) . . . . ? 
C2 C3 C4 O3 179.18(12) . . . . ? 
C2 C3 C4 C5 -1.00(19) . . . . ? 
O3 C4 C5 C6 -179.73(13) . . . . ? 
C3 C4 C5 C6 0.4(2) . . . . ? 
C4 C5 C6 C7 0.7(2) . . . . ? 
C3 C2 C7 O2 -178.87(11) . . . . ? 
C1 C2 C7 O2 0.12(19) . . . . ? 
C3 C2 C7 C6 0.64(19) . . . . ? 
C1 C2 C7 C6 179.63(12) . . . . ? 
C5 C6 C7 O2 178.33(12) . . . . ? 
C5 C6 C7 C2 -1.2(2) . . . . ? 
C2 C7 O2 C8 2.92(18) . . . . ? 
C6 C7 O2 C8 -176.61(12) . . . . ? 
C7 O2 C8 C9 -2.8(2) . . . . ? 
O2 C8 C9 C1 -0.4(2) . . . . ? 
O2 C8 C9 C11 178.90(12) . . . . ? 
O1 C1 C9 C8 -176.68(13) . . . . ? 
C2 C1 C9 C8 3.29(17) . . . . ? 
O1 C1 C9 C11 4.0(2) . . . . ? 
C2 C1 C9 C11 -175.99(11) . . . . ? 
C3 C4 O3 C10 -5.8(2) . . . . ? 
C5 C4 O3 C10 174.36(12) . . . . ? 
C8 C9 C11 C18 46.50(18) . . . . ? 
C1 C9 C11 C18 -134.22(13) . . . . ? 
C8 C9 C11 C12 -129.87(14) . . . . ? 
C1 C9 C11 C12 49.41(18) . . . . ? 
C18 C11 C12 C13 -3.2(2) . . . . ? 
C9 C11 C12 C13 173.24(12) . . . . ? 
C11 C12 C13 C14 1.7(2) . . . . ? 
C12 C13 C14 O4 -178.21(13) . . . . ? 
C12 C13 C14 C17 1.8(2) . . . . ? 
C13 C14 O4 C15 167.24(13) . . . . ? 
C17 C14 O4 C15 -12.76(19) . . . . ? 
C14 O4 C15 C16 43.93(17) . . . . ? 
O4 C15 C16 O5 -62.44(17) . . . . ? 
C15 C16 O5 C17 46.87(17) . . . . ? 
C16 O5 C17 C18 165.51(13) . . . . ? 
C16 O5 C17 C14 -15.88(19) . . . . ? 
O4 C14 C17 O5 -2.4(2) . . . . ? 
C13 C14 C17 O5 177.64(12) . . . . ? 
O4 C14 C17 C18 176.23(12) . . . . ? 
C13 C14 C17 C18 -3.78(19) . . . . ? 
C12 C11 C18 C17 1.20(19) . . . . ? 
C9 C11 C18 C17 -175.25(12) . . . . ? 
O5 C17 C18 C11 -179.07(12) . . . . ? 
C14 C17 C18 C11 2.3(2) . . . . ? 
  
loop_ 
 _geom_hbond_atom_site_label_D 
 _geom_hbond_atom_site_label_H 
 _geom_hbond_atom_site_label_A 
 _geom_hbond_distance_DH 
 _geom_hbond_distance_HA 
 _geom_hbond_distance_DA 
 _geom_hbond_angle_DHA 
 _geom_hbond_site_symmetry_A 
C13 H13 O1  0.94 2.48 3.3970(17) 163.8 2_545 
C10 H10B O3  0.97 2.55 3.4005(19) 146.9 3_585 
  
_refine_diff_density_max    0.347 
_refine_diff_density_min   -0.183 
_refine_diff_density_rms    0.044 
  
_shelx_res_file 
; 
  
    DK3308.res created by SHELXL-2014/7 
  
TITL DK3308 in P2(1)/n 
CELL 0.71073   7.18690  10.27640  19.67710  90.0000  99.4418  90.0000 
ZERR    4.00   0.00040   0.00060   0.00100   0.0000   0.0020   0.0000 
LATT 1 
SYMM 0.5-X, 0.5+Y, 0.5-Z 
SFAC C  H  O 
UNIT 72 56 20 
L.S. 4 
ACTA 
BOND $H 
FMAP 2 
PLAN 20 
CONF 
EQIV $1 0.5-x, -0.5+y, 0.5-z 
EQIV $2 -x, 3-y, -z 
HTAB C13 O1_$1 
HTAB C10 O3_$2 
SIZE 0.10 0.15 0.19 
TEMP -50.000 
WGHT    0.048900    0.509700 
FVAR       0.18233 
MOLE 1 
O1    3    0.380060    0.952893    0.153453    11.00000    0.05287    0.03144 = 
         0.02081   -0.00136    0.00206    0.00685 
C1    1    0.343724    0.915000    0.093520    11.00000    0.02455    0.02745 = 
         0.02255    0.00177    0.00480    0.00205 
C2    1    0.273761    1.004421    0.036200    11.00000    0.02143    0.02554 = 
         0.02337    0.00241    0.00421    0.00006 
C3    1    0.234559    1.135198    0.049104    11.00000    0.02761    0.02510 = 
         0.02519    0.00087    0.00446   -0.00107 
AFIX  43 
H3    2    0.255475    1.167354    0.094440    11.00000   -1.20000 
AFIX   0 
C4    1    0.165329    1.216102   -0.004978    11.00000    0.02612    0.02291 = 
         0.03354    0.00400    0.00491   -0.00131 
C5    1    0.136857    1.168555   -0.072850    11.00000    0.03196    0.02951 = 
         0.02719    0.00891    0.00085   -0.00107 
AFIX  43 
H5    2    0.090369    1.224576   -0.109483    11.00000   -1.20000 
AFIX   0 
C6    1    0.175905    1.041927   -0.086248    11.00000    0.03121    0.03339 = 
         0.02184    0.00218    0.00165   -0.00186 
AFIX  43 
H6    2    0.157958    1.010630   -0.131743    11.00000   -1.20000 
AFIX   0 
C7    1    0.242916    0.959914   -0.031154    11.00000    0.02473    0.02540 = 
         0.02532    0.00063    0.00393    0.00038 
O2    3    0.275144    0.832539   -0.047468    11.00000    0.04262    0.02818 = 
         0.02107   -0.00084    0.00130    0.00545 
C8    1    0.330592    0.749118    0.004924    11.00000    0.03313    0.02394 = 
         0.02610   -0.00032    0.00218    0.00344 
AFIX  43 
H8    2    0.346587    0.661567   -0.006698    11.00000   -1.20000 
AFIX   0 
C9    1    0.365140    0.779997    0.072459    11.00000    0.02384    0.02411 = 
         0.02404    0.00195    0.00409    0.00216 
O3    3    0.119987    1.344117    0.001232    11.00000    0.04954    0.02390 = 
         0.03648    0.00469    0.00378    0.00561 
C10   1    0.129611    1.394100    0.069280    11.00000    0.04649    0.02754 = 
         0.04332   -0.00474    0.00100    0.00329 
AFIX 137 
H10A  2    0.049876    1.342353    0.094073    11.00000   -1.50000 
H10B  2    0.086622    1.483709    0.067034    11.00000   -1.50000 
H10C  2    0.258884    1.390258    0.093047    11.00000   -1.50000 
AFIX   0 
C11   1    0.422086    0.674988    0.123732    11.00000    0.02807    0.02207 = 
         0.02237   -0.00038    0.00200   -0.00105 
C12   1    0.330735    0.659725    0.180856    11.00000    0.03067    0.02917 = 
         0.02640   -0.00170    0.00596    0.00347 
AFIX  43 
H12   2    0.241576    0.721689    0.189760    11.00000   -1.20000 
AFIX   0 
C13   1    0.371104    0.553732    0.224331    11.00000    0.03739    0.03340 = 
         0.02310    0.00172    0.00818   -0.00081 
AFIX  43 
H13   2    0.306632    0.543043    0.261837    11.00000   -1.20000 
AFIX   0 
C14   1    0.506017    0.463239    0.212910    11.00000    0.03668    0.02510 = 
         0.01918    0.00200   -0.00014   -0.00160 
O4    3    0.537900    0.357545    0.256203    11.00000    0.05852    0.03114 = 
         0.02711    0.00908    0.00728    0.00711 
C15   1    0.648782    0.257358    0.230835    11.00000    0.06961    0.03015 = 
         0.03551    0.00750    0.00304    0.01244 
AFIX  23 
H15A  2    0.569555    0.208215    0.194356    11.00000   -1.20000 
H15B  2    0.695633    0.196896    0.268261    11.00000   -1.20000 
AFIX   0 
C16   1    0.811233    0.315243    0.203191    11.00000    0.05548    0.04071 = 
         0.03312    0.00418   -0.00097    0.01979 
AFIX  23 
H16A  2    0.889498    0.365580    0.239411    11.00000   -1.20000 
H16B  2    0.889142    0.245687    0.188547    11.00000   -1.20000 
AFIX   0 
O5    3    0.744522    0.398559    0.145668    11.00000    0.04726    0.03467 = 
         0.03098    0.00516    0.00761    0.01772 
C17   1    0.604844    0.481822    0.158261    11.00000    0.02955    0.02403 = 
         0.02298   -0.00278    0.00095    0.00197 
C18   1    0.559805    0.585841    0.113668    11.00000    0.02830    0.02558 = 
         0.02223    0.00030    0.00459   -0.00065 
AFIX  43 
H18   2    0.623734    0.596065    0.075989    11.00000   -1.20000 
AFIX   0 
HKLF 4 
  
REM  DK3308 in P2(1)/n 
REM R1 =  0.0396 for    2730 Fo > 4sig(Fo)  and  0.0577 for all    3573 data 
REM    209 parameters refined using      0 restraints 
  
END 
  
WGHT      0.0489      0.5097 
  
REM Highest difference peak  0.347,  deepest hole -0.183,  1-sigma level  0.044 
Q1    1   0.3580  0.8446  0.0820  11.00000  0.05    0.35 
Q2    1   0.3003  0.9574  0.0615  11.00000  0.05    0.33 
Q3    1   0.3966  0.7320  0.0993  11.00000  0.05    0.31 
Q4    1   0.2823  0.9840  0.0016  11.00000  0.05    0.29 
Q5    1   0.4067  0.7780  0.0437  11.00000  0.05    0.27 
Q6    1   0.3651  0.6607  0.1439  11.00000  0.05    0.26 
Q7    1   0.2798  1.0746  0.0374  11.00000  0.05    0.26 
Q8    1   0.2866  0.7627  0.0441  11.00000  0.05    0.26 
Q9    1   0.2013  1.0021 -0.0561  11.00000  0.05    0.25 
Q10   1   0.2266  1.0598  0.0427  11.00000  0.05    0.24 
Q11   1   0.2658  0.9026 -0.0383  11.00000  0.05    0.23 
Q12   1   0.5084  0.6472  0.1260  11.00000  0.05    0.23 
Q13   1   0.5722  0.4843  0.1927  11.00000  0.05    0.23 
Q14   1   0.1127  1.1821 -0.0362  11.00000  0.05    0.23 
Q15   1   0.1152  1.0979 -0.0755  11.00000  0.05    0.21 
Q16   1   0.1687  1.1686  0.0182  11.00000  0.05    0.21 
Q17   1   0.3838  0.6173  0.2052  11.00000  0.05    0.20 
Q18   1   0.5740  0.5392  0.1376  11.00000  0.05    0.20 
Q19   1   0.1552  1.2753  0.0007  11.00000  0.05    0.19 
Q20   1   0.5490  0.5175  0.1263  11.00000  0.05    0.18 
; 
_shelx_res_checksum   96971 
  
_shelx_hkl_file 
; 
   1   0   0   -0.57    0.02 
   1   0   0   -0.54    0.02 
   1   0   0   -0.56    0.02 
   1   0   0   -0.55    0.03 
  -1   0   0   -0.54    0.03 
   1   0   0   -0.57    0.02 
  -1   0   0   -0.57    0.02 
  -1   0   0   -0.57    0.02 
  -2   0   0  365.03    8.51 
   2   0   0  382.92    8.61 
   2   0   0  370.92    8.49 
   2   0   0  378.84    8.58 
   2   0   0  381.29    8.59 
  -2   0   0  397.63    8.62 
  -3   0   0    0.01    0.07 
  -3   0   0    0.00    0.07 
   3   0   0    0.04    0.06 
   3   0   0    0.11    0.08 
   3   0   0   -0.01    0.05 
   3   0   0   -0.01    0.05 
   3   0   0   -0.04    0.03 
  -3   0   0    0.04    0.06 
  -4   0   0   39.40    0.98 
  -4   0   0   37.89    0.98 
   4   0   0   38.47    0.95 
   4   0   0   38.09    0.94 
   4   0   0   38.32    0.94 
   4   0   0   38.96    0.97 
   4   0   0   39.05    0.89 
  -4   0   0   37.82    1.03 
   5   0   0    0.18    0.08 
  -5   0   0    0.28    0.14 
  -5   0   0    0.26    0.12 
  -5   0   0    0.17    0.11 
   5   0   0    0.34    0.15 
   5   0   0    0.15    0.09 
   5   0   0    0.06    0.14 
   6   0   0    0.78    0.20 
  -6   0   0    1.23    0.19 
  -6   0   0    1.28    0.19 
   6   0   0    0.95    0.13 
   6   0   0    0.82    0.15 
   7   0   0    0.28    0.25 
  -7   0   0    0.69    0.23 
  -7   0   0    0.72    0.17 
   7   0   0    0.16    0.12 
   7   0   0    0.54    0.17 
   8   0   0    6.76    0.50 
  -8   0   0    7.38    0.49 
   8   0   0    7.22    0.43 
  -8   0   0    7.63    0.58 
   8   0   0    7.32    0.52 
  -9   0   0    0.21    0.36 
   9   0   0   -0.11    0.26 
   9   0   0   -0.17    0.24 
  -9   0   0    0.30    0.31 
   9   0   0   -0.59    0.46 
   1  -1   0  100.93    2.13 
   1  -1   0   95.34    2.13 
   1  -1   0   91.82    2.14 
  -1  -1   0   88.03    2.09 
  -1  -1   0   96.99    2.11 
  -1  -1   0   94.19    2.09 
  -1  -1   0   93.71    2.13 
  -1   1   0   90.15    2.14 
  -1   1   0   94.22    2.10 
   1   1   0   81.33    2.10 
   1   1   0   95.60    2.09 
   1   1   0   97.87    2.14 
   1   1   0   92.15    2.12 
  -2  -1   0  882.63   19.50 
  -2  -1   0  861.32   19.47 
  -2  -1   0  852.80   19.56 
   2  -1   0  868.62   19.51 
   2  -1   0  860.09   19.40 
  -2  -1   0  851.20   19.40 
  -2  -1   0  874.38   19.50 
   2  -1   0  855.12   19.59 
   2   1   0  894.58   19.61 
   2   1   0  825.80   19.44 
  -2   1   0  853.64   19.52 
   2   1   0  858.87   19.48 
  -2   1   0  894.93   19.39 
  -2   1   0  894.78   19.55 
  -2   1   0  860.47   19.62 
  -3  -1   0   21.05    0.57 
  -3  -1   0   20.70    0.54 
  -3  -1   0   22.18    0.59 
   3  -1   0   22.00    0.52 
   3  -1   0   21.56    0.56 
   3  -1   0   22.95    0.55 
  -3  -1   0   22.23    0.58 
   3  -1   0   22.27    0.64 
  -3  -1   0   21.95    0.56 
  -3   1   0   21.34    0.58 
  -3   1   0   21.53    0.61 
   3   1   0   22.00    0.55 
   3   1   0   23.10    0.55 
   3   1   0   21.79    0.57 
  -3   1   0   21.89    0.58 
   3   1   0   21.59    0.57 
   4  -1   0   21.86    0.58 
   4  -1   0   22.65    0.62 
  -4  -1   0   22.63    0.63 
   4  -1   0   22.03    0.58 
  -4  -1   0   21.20    0.61 
   4  -1   0   22.03    0.60 
   4   1   0   21.91    0.57 
   4   1   0   22.11    0.58 
   4   1   0   21.69    0.60 
  -4   1   0   22.71    0.62 
   4   1   0   21.65    0.59 
  -4   1   0   21.80    0.65 
  -4   1   0   21.81    0.62 
  -5  -1   0    1.59    0.21 
  -5  -1   0    1.22    0.16 
   5  -1   0    1.42    0.15 
  -5  -1   0    1.46    0.17 
   5  -1   0    1.71    0.19 
   5  -1   0    1.47    0.15 
   5  -1   0    1.58    0.19 
   5   1   0    1.46    0.14 
  -5   1   0    1.68    0.18 
   5   1   0    1.93    0.18 
   5   1   0    1.59    0.14 
   5   1   0    1.77    0.13 
   5   1   0    1.77    0.17 
  -5   1   0    1.64    0.18 
  -5   1   0    1.73    0.20 
   5   1   0    1.36    0.17 
   6  -1   0    4.70    0.29 
  -6  -1   0    4.89    0.31 
   6  -1   0    5.00    0.38 
   6  -1   0    4.85    0.25 
  -6  -1   0    4.86    0.37 
   6   1   0    5.42    0.37 
  -6   1   0    5.03    0.37 
  -6   1   0    4.86    0.31 
   6   1   0    5.51    0.18 
   6   1   0    4.95    0.26 
   6   1   0    5.10    0.27 
  -6   1   0    5.87    0.36 
   6   1   0    4.80    0.17 
   7  -1   0    0.01    0.17 
  -7  -1   0   -0.12    0.15 
   7  -1   0    0.04    0.12 
   7  -1   0   -0.13    0.26 
   7   1   0   -0.05    0.12 
  -7   1   0    0.42    0.22 
   7   1   0   -0.01    0.25 
   7   1   0    0.19    0.16 
  -7   1   0    0.18    0.17 
  -7   1   0    0.05    0.24 
   8  -1   0    2.05    0.28 
  -8  -1   0    1.28    0.29 
  -8  -1   0    2.92    0.34 
   8  -1   0    1.66    0.41 
   8  -1   0    1.67    0.20 
  -8   1   0    1.51    0.34 
  -8   1   0    1.92    0.31 
   8   1   0    1.43    0.39 
   8   1   0    2.08    0.24 
  -9  -1   0    0.29    0.31 
   9  -1   0    0.27    0.25 
   9  -1   0    0.45    0.30 
   9  -1   0   -0.09    0.51 
  -9  -1   0    0.34    0.38 
   9   1   0    0.51    0.50 
  -9   1   0   -0.50    0.40 
   9   1   0    0.52    0.25 
  -9   1   0    0.20    0.29 
  -9   1   0    0.86    0.41 
   9   1   0    0.53    0.24 
   0  -2   0    0.06    0.02 
   0  -2   0    0.27    0.08 
   0  -2   0    0.03    0.03 
   0   2   0    0.01    0.04 
   0   2   0    0.03    0.07 
  -1  -2   0   28.25    0.69 
   1  -2   0   30.37    0.69 
  -1  -2   0   27.57    0.67 
  -1  -2   0   26.92    0.74 
  -1   2   0   29.72    0.72 
  -1   2   0   29.48    0.76 
   1   2   0   28.19    0.67 
  -1   2   0   28.58    0.69 
   1   2   0   28.80    0.74 
   1   2   0   28.74    0.69 
  -2  -2   0    4.61    0.16 
  -2  -2   0    4.72    0.15 
  -2  -2   0    4.59    0.17 
   2  -2   0    4.64    0.22 
  -2  -2   0    4.61    0.21 
   2  -2   0    4.49    0.17 
  -2   2   0    4.52    0.18 
  -2   2   0    4.24    0.23 
   2   2   0    4.69    0.16 
   2   2   0    5.08    0.21 
  -2   2   0    4.68    0.17 
   2   2   0    4.41    0.16 
  -3  -2   0   14.30    0.41 
  -3  -2   0   15.08    0.39 
   3  -2   0   14.53    0.51 
  -3  -2   0   14.62    0.47 
  -3  -2   0   15.17    0.43 
  -3  -2   0   14.66    0.41 
   3  -2   0   14.53    0.41 
  -3   2   0   15.05    0.39 
  -3   2   0   14.88    0.43 
   3   2   0   14.58    0.41 
  -3   2   0   14.25    0.43 
   3   2   0   15.58    0.39 
   3   2   0   15.04    0.45 
  -3   2   0   14.74    0.50 
   3   2   0   15.00    0.41 
   4  -2   0   13.11    0.51 
  -4  -2   0   13.08    0.39 
   4  -2   0   13.23    0.39 
  -4  -2   0   12.28    0.41 
  -4  -2   0   12.81    0.37 
  -4  -2   0   13.16    0.45 
  -4  -2   0   13.21    0.42 
  -4   2   0   12.97    0.33 
   4   2   0   12.87    0.40 
   4   2   0   12.51    0.38 
  -4   2   0   12.60    0.48 
   4   2   0   13.56    0.38 
   4   2   0   12.55    0.41 
  -4   2   0   12.00    0.41 
  -4   2   0   13.45    0.42 
  -5  -2   0    3.67    0.23 
  -5  -2   0    3.44    0.20 
  -5  -2   0    4.08    0.30 
   5  -2   0    3.25    0.29 
   5  -2   0    3.29    0.26 
   5  -2   0    3.56    0.21 
  -5  -2   0    3.23    0.23 
  -5   2   0    3.36    0.24 
   5   2   0    3.65    0.22 
  -5   2   0    3.66    0.27 
   5   2   0    3.27    0.21 
   5   2   0    3.66    0.28 
   5   2   0    3.46    0.27 
  -5   2   0    3.35    0.32 
   5   2   0    3.72    0.23 
  -6  -2   0    8.05    0.38 
  -6  -2   0    8.39    0.46 
   6  -2   0    7.17    0.43 
   6  -2   0    7.92    0.39 
   6  -2   0    7.91    0.32 
   6   2   0    8.03    0.34 
  -6   2   0    7.90    0.42 
  -6   2   0    7.09    0.46 
   6   2   0    7.95    0.33 
   6   2   0    7.88    0.32 
   6   2   0    7.50    0.41 
  -6   2   0    7.45    0.37 
   7  -2   0    1.74    0.20 
   7  -2   0    1.81    0.23 
   7  -2   0    2.13    0.33 
  -7  -2   0    2.33    0.31 
  -7  -2   0    1.58    0.22 
   7   2   0    1.78    0.18 
   7   2   0    1.66    0.14 
  -7   2   0    1.69    0.25 
   7   2   0    1.43    0.19 
   7   2   0    1.62    0.20 
   7   2   0    1.52    0.28 
  -8  -2   0    2.42    0.34 
   8  -2   0    2.98    0.31 
   8  -2   0    2.77    0.45 
   8  -2   0    2.55    0.25 
   8   2   0    2.92    0.27 
   8   2   0    2.47    0.41 
  -8   2   0    2.47    0.36 
   9  -2   0    0.45    0.34 
  -9  -2   0    0.07    0.29 
   9  -2   0    0.29    0.36 
   9  -2   0   -0.18    0.51 
   9   2   0    0.17    0.27 
  -9   2   0    0.20    0.46 
   9   2   0    0.50    0.26 
  -9   2   0    0.40    0.29 
   9   2   0    0.02    0.50 
   0  -3   0   -0.07    0.03 
   0  -3   0    0.03    0.08 
   0  -3   0   -0.01    0.03 
   0   3   0   -0.11    0.06 
   0   3   0   -0.04    0.08 
   0   3   0   -0.05    0.04 
   1  -3   0   -0.01    0.04 
  -1  -3   0    0.00    0.04 
   1  -3   0   -0.05    0.07 
  -1  -3   0    0.00    0.04 
  -1  -3   0   -0.03    0.08 
  -1   3   0   -0.04    0.08 
   1   3   0   -0.09    0.07 
  -1   3   0   -0.01    0.05 
   1   3   0    0.02    0.05 
   1   3   0    0.01    0.03 
  -1   3   0   -0.03    0.05 
   2  -3   0   10.78    0.41 
  -2  -3   0   11.01    0.31 
  -2  -3   0   10.29    0.40 
   2  -3   0   10.82    0.33 
  -2  -3   0   10.89    0.32 
   2   3   0   10.97    0.30 
   2   3   0   10.68    0.32 
  -2   3   0   11.41    0.34 
  -2   3   0   11.42    0.42 
  -2   3   0   11.16    0.36 
   2   3   0   11.26    0.39 
  -3  -3   0    4.64    0.28 
  -3  -3   0    4.93    0.18 
  -3  -3   0    4.38    0.20 
  -3  -3   0    4.22    0.19 
   3  -3   0    4.38    0.20 
   3  -3   0    4.69    0.28 
  -3   3   0    4.42    0.21 
   3   3   0    4.19    0.25 
  -3   3   0    4.31    0.22 
  -3   3   0    4.36    0.28 
   3   3   0    4.76    0.20 
   3   3   0    4.52    0.19 
  -4  -3   0    0.36    0.08 
   4  -3   0    0.27    0.08 
  -4  -3   0    0.17    0.13 
  -4  -3   0    0.09    0.11 
  -4  -3   0    0.28    0.08 
   4  -3   0    0.07    0.15 
   4   3   0    0.25    0.11 
  -4   3   0    0.23    0.11 
   4   3   0    0.21    0.11 
  -4   3   0    0.29    0.08 
  -4   3   0    0.27    0.12 
  -4   3   0    0.09    0.14 
   4   3   0    0.32    0.09 
  -5  -3   0    0.38    0.11 
  -5  -3   0    0.19    0.17 
  -5  -3   0    0.37    0.13 
   5  -3   0    0.44    0.21 
   5  -3   0    0.33    0.10 
  -5  -3   0    0.38    0.17 
  -5  -3   0    0.36    0.10 
   5   3   0    0.14    0.13 
  -5   3   0    0.39    0.15 
   5   3   0    0.24    0.15 
   5   3   0    0.29    0.12 
  -5   3   0    0.25    0.14 
  -5   3   0    0.45    0.19 
   5   3   0    0.35    0.13 
   6  -3   0    2.80    0.24 
  -6  -3   0    3.67    0.28 
   6  -3   0    2.67    0.27 
  -6  -3   0    3.19    0.29 
  -6  -3   0    1.73    0.27 
  -6   3   0    3.21    0.34 
   6   3   0    2.47    0.25 
  -6   3   0    2.24    0.30 
   6   3   0    3.17    0.26 
   6   3   0    2.30    0.26 
   6   3   0    3.06    0.26 
  -7  -3   0    1.23    0.22 
  -7  -3   0    0.16    0.24 
   7  -3   0    1.12    0.31 
   7  -3   0    1.25    0.19 
   7  -3   0    0.93    0.29 
   7   3   0    1.37    0.19 
  -7   3   0    1.22    0.31 
   7   3   0    1.30    0.20 
  -7   3   0    1.27    0.23 
   7   3   0    0.99    0.28 
   7   3   0    1.43    0.20 
  -8  -3   0   -0.02    0.26 
   8  -3   0    0.19    0.27 
   8  -3   0    0.16    0.19 
   8  -3   0    0.81    0.39 
  -8  -3   0   -0.36    0.31 
  -8  -3   0   -0.57    0.44 
  -8   3   0    0.29    0.27 
  -8   3   0    0.53    0.33 
   8   3   0    0.13    0.22 
   8   3   0    0.18    0.21 
  -8   3   0    0.72    0.40 
   8   3   0   -0.14    0.13 
   8   3   0    0.25    0.37 
   8   3   0    0.25    0.13 
   9  -3   0    0.95    0.31 
   9  -3   0    0.90    0.63 
   9  -3   0    1.21    0.38 
  -9  -3   0    1.25    0.40 
   9   3   0    1.26    0.54 
  -9   3   0    0.86    0.39 
   9   3   0    1.14    0.30 
  -9   3   0    1.12    0.52 
   9   3   0    1.41    0.32 
   0  -4   0    5.67    0.30 
   0  -4   0    6.00    0.22 
   0  -4   0    6.10    0.19 
   0   4   0    6.10    0.28 
   0   4   0    5.82    0.23 
   1  -4   0   20.03    0.53 
  -1  -4   0   19.56    0.49 
  -1  -4   0   18.67    0.53 
   1  -4   0   19.56    0.65 
  -1  -4   0   19.40    0.63 
  -1   4   0   18.85    0.64 
   1   4   0   20.42    0.64 
   1   4   0   19.89    0.53 
   1   4   0   19.02    0.48 
  -1   4   0   19.19    0.54 
  -1   4   0   19.10    0.59 
   2  -4   0    0.33    0.09 
  -2  -4   0    0.37    0.13 
  -2  -4   0    0.32    0.07 
  -2  -4   0    0.39    0.08 
   2  -4   0    0.30    0.12 
  -2   4   0    0.34    0.09 
  -2   4   0    0.40    0.11 
  -2   4   0    0.47    0.16 
   2   4   0    0.41    0.14 
   2   4   0    0.38    0.08 
   2   4   0    0.40    0.07 
   3  -4   0   14.71    0.55 
  -3  -4   0   13.67    0.39 
  -3  -4   0   13.55    0.41 
  -3  -4   0   14.28    0.43 
   3  -4   0   14.02    0.43 
  -3  -4   0   14.85    0.54 
   3   4   0   13.97    0.51 
   3   4   0   13.63    0.40 
  -3   4   0   13.28    0.55 
   3   4   0   13.30    0.42 
  -3   4   0   14.44    0.45 
  -3   4   0   13.57    0.45 
   4  -4   0    7.00    0.29 
  -4  -4   0    6.83    0.40 
   4  -4   0    6.23    0.44 
  -4  -4   0    7.20    0.31 
  -4  -4   0    7.45    0.29 
  -4  -4   0    6.71    0.26 
   4   4   0    7.17    0.37 
  -4   4   0    7.02    0.42 
  -4   4   0    6.95    0.33 
  -4   4   0    6.94    0.29 
   4   4   0    6.78    0.28 
   4   4   0    6.70    0.35 
   4   4   0    6.55    0.28 
  -5  -4   0    0.58    0.18 
   5  -4   0    0.64    0.13 
  -5  -4   0    0.69    0.20 
  -5  -4   0    0.67    0.13 
   5  -4   0    0.38    0.25 
  -5  -4   0    0.53    0.12 
  -5   4   0    0.57    0.18 
  -5   4   0    0.66    0.17 
   5   4   0    0.52    0.18 
   5   4   0    0.85    0.14 
   5   4   0    0.48    0.16 
  -5   4   0    0.17    0.20 
  -5   4   0    0.68    0.11 
   5   4   0    0.48    0.15 
  -6  -4   0    3.53    0.35 
   6  -4   0    3.49    0.27 
  -6  -4   0    3.48    0.32 
  -6  -4   0    4.01    0.32 
   6  -4   0    4.04    0.42 
  -6   4   0    3.83    0.39 
   6   4   0    3.57    0.29 
   6   4   0    3.13    0.34 
   6   4   0    2.98    0.32 
  -6   4   0    3.41    0.31 
   7  -4   0    2.01    0.23 
   7  -4   0    2.63    0.35 
   7   4   0    2.27    0.26 
   7   4   0    2.25    0.28 
   7   4   0    2.10    0.31 
  -7   4   0    2.17    0.32 
   7   4   0    3.44    0.38 
   8  -4   0    0.05    0.33 
   8  -4   0   -0.10    0.21 
   8  -4   0    0.61    0.46 
   8   4   0    0.09    0.37 
   8   4   0    0.33    0.23 
  -8   4   0    0.12    0.26 
  -8   4   0   -0.18    0.36 
   8   4   0    0.48    0.24 
   8   4   0    0.10    0.22 
  -8   4   0    0.19    0.43 
   8   4   0    0.31    0.22 
  -9  -4   0   -0.92    0.46 
   9  -4   0   -0.08    0.75 
   9  -4   0   -0.49    0.41 
  -9   4   0    0.00    0.60 
   9   4   0    0.34    0.31 
  -9   4   0    0.35    0.33 
   9   4   0   -0.30    0.55 
   0  -5   0    0.02    0.06 
   0  -5   0    0.04    0.13 
   0  -5   0   -0.07    0.06 
   0   5   0   -0.01    0.11 
   0   5   0   -0.05    0.13 
   0   5   0    0.01    0.08 
  -1  -5   0    3.69    0.31 
  -1  -5   0    3.97    0.17 
  -1  -5   0    4.13    0.20 
   1  -5   0    4.07    0.21 
   1  -5   0    4.21    0.32 
  -1   5   0    4.48    0.23 
  -1   5   0    4.35    0.27 
   1   5   0    4.21    0.17 
   1   5   0    3.78    0.31 
  -1   5   0    4.28    0.32 
   1   5   0    4.22    0.30 
   1   5   0    4.14    0.21 
  -2  -5   0    5.57    0.23 
  -2  -5   0    5.90    0.26 
  -2  -5   0    5.62    0.37 
   2  -5   0    5.66    0.25 
   2  -5   0    5.49    0.36 
   2   5   0    5.51    0.33 
   2   5   0    6.11    0.22 
   2   5   0    6.19    0.37 
  -2   5   0    5.82    0.31 
  -2   5   0    6.55    0.29 
   2   5   0    5.92    0.26 
  -2   5   0    5.63    0.39 
  -3  -5   0    5.16    0.25 
   3  -5   0    4.76    0.24 
  -3  -5   0    4.96    0.24 
  -3  -5   0    5.02    0.21 
   3  -5   0    4.84    0.35 
  -3  -5   0    5.26    0.38 
   3   5   0    5.15    0.35 
  -3   5   0    4.55    0.38 
  -3   5   0    5.04    0.28 
  -3   5   0    4.98    0.30 
   3   5   0    5.04    0.34 
   3   5   0    4.87    0.25 
   3   5   0    4.67    0.22 
   4  -5   0    7.88    0.34 
   4  -5   0    8.27    0.48 
  -4  -5   0    7.89    0.30 
  -4  -5   0    7.90    0.35 
  -4  -5   0    7.95    0.47 
  -4  -5   0    7.92    0.33 
   4   5   0    8.17    0.33 
  -4   5   0    7.97    0.36 
   4   5   0    7.88    0.43 
  -4   5   0    8.48    0.39 
  -4   5   0    8.20    0.52 
   4   5   0    8.43    0.44 
   4   5   0    7.88    0.34 
   5  -5   0    2.52    0.23 
   5  -5   0    2.44    0.36 
  -5  -5   0    2.55    0.25 
  -5  -5   0    2.30    0.24 
  -5  -5   0    2.23    0.18 
  -5  -5   0    2.43    0.33 
  -5   5   0    2.26    0.34 
   5   5   0    2.74    0.29 
   5   5   0    1.88    0.26 
  -5   5   0    1.87    0.23 
   5   5   0    2.09    0.21 
   5   5   0    2.32    0.22 
  -5   5   0    2.18    0.23 
  -5   5   0    2.46    0.27 
   6  -5   0   10.51    0.72 
   6  -5   0    9.59    0.42 
  -6  -5   0    9.23    0.39 
  -6  -5   0    9.01    0.42 
   6   5   0    9.32    0.46 
  -6   5   0    8.72    0.45 
  -6   5   0    9.49    0.53 
   6   5   0    9.37    0.43 
   6   5   0    9.40    0.53 
   6   5   0    8.28    0.48 
  -6   5   0   10.62    0.69 
   7  -5   0    5.85    0.40 
  -7  -5   0    6.67    0.51 
  -7  -5   0    7.02    0.40 
   7   5   0    6.81    0.55 
  -7   5   0    6.13    0.45 
   7   5   0    7.08    0.52 
   7   5   0    6.16    0.45 
  -7   5   0    7.04    0.74 
   7   5   0    6.39    0.43 
   8  -5   0    3.82    0.35 
   8  -5   0    3.88    0.57 
   8  -5   0    3.91    0.48 
  -8  -5   0    3.08    0.51 
   8   5   0    4.24    0.37 
   8   5   0    4.21    0.41 
   8   5   0    4.63    0.47 
   8   5   0    3.63    0.45 
  -8   5   0    4.08    0.46 
  -8   5   0    3.62    0.60 
   0  -6   0   26.29    0.73 
   0  -6   0   26.86    0.90 
   0  -6   0   26.56    0.67 
   0   6   0   26.38    0.90 
   0   6   0   26.50    0.74 
   0   6   0   26.10    0.84 
  -1  -6   0   -0.05    0.07 
   1  -6   0   -0.14    0.15 
   1  -6   0    0.00    0.08 
  -1  -6   0    0.20    0.17 
  -1  -6   0    0.07    0.08 
   1  -6   0   -0.01    0.06 
  -1   6   0   -0.18    0.15 
  -1   6   0   -0.06    0.10 
  -1   6   0    0.02    0.14 
   1   6   0    0.04    0.13 
   1   6   0    0.10    0.07 
   1   6   0   -0.03    0.09 
   1   6   0   -0.02    0.15 
  -2  -6   0    0.07    0.10 
  -2  -6   0    0.26    0.19 
   2  -6   0    0.01    0.16 
   2  -6   0    0.10    0.10 
  -2  -6   0    0.04    0.10 
   2   6   0    0.06    0.08 
   2   6   0    0.33    0.15 
   2   6   0   -0.01    0.11 
  -2   6   0    0.05    0.19 
  -2   6   0    0.17    0.14 
  -2   6   0    0.15    0.13 
   2   6   0    0.12    0.18 
   3  -6   0    6.76    0.45 
  -3  -6   0    7.07    0.31 
  -3  -6   0    6.39    0.48 
   3  -6   0    6.99    0.32 
  -3  -6   0    6.94    0.31 
   3   6   0    6.78    0.28 
  -3   6   0    6.85    0.51 
  -3   6   0    6.91    0.36 
   3   6   0    6.69    0.31 
   3   6   0    7.24    0.43 
   3   6   0    6.39    0.44 
  -3   6   0    7.22    0.39 
  -4  -6   0    3.55    0.23 
  -4  -6   0    3.42    0.29 
  -4  -6   0    3.47    0.26 
   4  -6   0    3.31    0.27 
  -4  -6   0    3.54    0.37 
   4  -6   0    2.90    0.34 
   4   6   0    3.94    0.39 
  -4   6   0    3.56    0.33 
  -4   6   0    3.81    0.33 
   4   6   0    3.38    0.26 
  -4   6   0    3.42    0.38 
   4   6   0    3.23    0.34 
   4   6   0    3.29    0.27 
   5  -6   0   13.41    0.51 
  -5  -6   0   13.83    0.54 
  -5  -6   0   14.00    0.71 
   5   6   0   12.90    0.64 
  -5   6   0   13.56    0.58 
  -5   6   0   12.99    0.73 
  -5   6   0   13.87    0.53 
   5   6   0   13.35    0.62 
   5   6   0   13.51    0.49 
   5   6   0   13.38    0.50 
  -6  -6   0    3.78    0.31 
   6  -6   0    4.00    0.35 
   6  -6   0    3.28    0.51 
  -6  -6   0    2.38    0.35 
  -6   6   0    3.12    0.36 
   6   6   0    4.06    0.38 
  -6   6   0    3.36    0.34 
   6   6   0    3.87    0.35 
   6   6   0    3.62    0.38 
   6   6   0    3.78    0.32 
  -7  -6   0    3.52    0.28 
   7  -6   0    3.61    0.55 
   7  -6   0    3.83    0.35 
  -7  -6   0    3.77    0.35 
  -7  -6   0    3.60    0.47 
   7   6   0    3.67    0.32 
  -7   6   0    3.04    0.56 
  -7   6   0    2.65    0.36 
   7   6   0    3.69    0.38 
   7   6   0    3.28    0.43 
   7   6   0    4.14    0.40 
   8  -6   0    0.13    0.30 
   8  -6   0    0.05    0.50 
  -8  -6   0   -0.03    0.37 
  -8  -6   0    0.37    0.50 
   8   6   0   -0.12    0.44 
   8   6   0    1.26    0.42 
   8   6   0    0.44    0.32 
  -8   6   0   -0.05    0.28 
   8   6   0    0.24    0.30 
  -8   6   0   -0.36    0.61 
  -8   6   0   -0.01    0.48 
   0  -7   0   -0.10    0.19 
   0  -7   0    0.09    0.10 
   0  -7   0   -0.06    0.08 
   0   7   0    0.24    0.15 
   0   7   0   -0.15    0.11 
   0   7   0    0.16    0.20 
   1  -7   0    3.08    0.36 
   1  -7   0    2.27    0.16 
  -1  -7   0    2.29    0.21 
   1  -7   0    2.34    0.22 
  -1  -7   0    2.63    0.35 
  -1  -7   0    2.50    0.19 
  -1   7   0    2.40    0.23 
   1   7   0    2.40    0.24 
  -1   7   0    1.79    0.29 
   1   7   0    1.97    0.25 
   1   7   0    2.15    0.32 
  -1   7   0    2.49    0.28 
  -2  -7   0   14.31    0.45 
   2  -7   0   14.75    0.69 
   2  -7   0   15.10    0.51 
  -2  -7   0   13.84    0.68 
  -2  -7   0   14.12    0.50 
   2   7   0   13.70    0.42 
  -2   7   0   15.11    0.61 
   2   7   0   13.89    0.50 
   2   7   0   14.81    0.63 
   2   7   0   13.22    0.67 
  -2   7   0   15.18    0.54 
  -2   7   0   15.19    0.72 
  -3  -7   0    0.06    0.11 
  -3  -7   0   -0.07    0.14 
   3  -7   0    0.06    0.13 
  -3  -7   0   -0.32    0.23 
   3  -7   0   -0.38    0.20 
  -3   7   0   -0.03    0.16 
  -3   7   0    0.11    0.29 
   3   7   0    0.07    0.13 
   3   7   0    0.12    0.20 
  -3   7   0    0.08    0.17 
   3   7   0   -0.07    0.14 
   3   7   0   -0.07    0.23 
  -4  -7   0    7.34    0.62 
  -4  -7   0    7.76    0.39 
   4  -7   0    7.69    0.62 
   4  -7   0    7.99    0.41 
   4   7   0    8.13    0.54 
   4   7   0    7.76    0.36 
  -4   7   0    8.47    0.45 
  -4   7   0    7.80    0.47 
   4   7   0    8.05    0.41 
   4   7   0    7.61    0.55 
  -4   7   0    8.08    0.63 
   5  -7   0    0.02    0.31 
   5  -7   0   -0.07    0.17 
  -5  -7   0   -0.17    0.16 
  -5  -7   0    0.08    0.32 
   5   7   0   -0.25    0.25 
   5   7   0    0.15    0.27 
   5   7   0    0.09    0.18 
  -5   7   0    0.14    0.20 
  -5   7   0    0.06    0.24 
   5   7   0    0.30    0.21 
  -6  -7   0    0.61    0.21 
  -6  -7   0    0.49    0.22 
  -6  -7   0    0.95    0.34 
   6  -7   0    0.72    0.23 
   6  -7   0    0.37    0.47 
  -6  -7   0    0.23    0.37 
  -6   7   0   -0.19    0.43 
   6   7   0    0.29    0.29 
   6   7   0    0.31    0.27 
  -6   7   0    0.74    0.48 
   6   7   0    0.64    0.24 
  -6   7   0    0.03    0.30 
  -6   7   0    0.03    0.20 
  -7  -7   0    0.24    0.47 
  -7  -7   0    0.39    0.42 
  -7  -7   0    1.03    0.31 
   7  -7   0    1.68    0.61 
  -7  -7   0    1.12    0.25 
   7  -7   0    1.11    0.31 
   7   7   0    0.31    0.35 
  -7   7   0    0.38    0.55 
   7   7   0    0.88    0.30 
  -7   7   0    0.81    0.31 
  -7   7   0    0.36    0.20 
   7   7   0    2.07    0.46 
   7   7   0    1.23    0.37 
  -7   7   0   -0.05    0.40 
   8  -7   0    0.51    0.40 
  -8  -7   0    0.13    0.28 
  -8  -7   0    0.80    0.43 
   8   7   0    1.14    0.54 
  -8   7   0    0.64    0.74 
   8   7   0    0.31    0.47 
   8   7   0    0.41    0.36 
  -8   7   0    0.44    0.30 
   0  -8   0    0.58    0.27 
   0  -8   0    0.26    0.14 
   0  -8   0    0.20    0.11 
   0   8   0    0.35    0.27 
   0   8   0    0.16    0.21 
   0   8   0    0.39    0.16 
   1  -8   0    0.21    0.24 
  -1  -8   0    0.29    0.13 
   1  -8   0    0.25    0.10 
  -1  -8   0    0.36    0.13 
   1  -8   0    0.28    0.15 
  -1  -8   0   -0.05    0.26 
   1   8   0    0.39    0.22 
  -1   8   0    0.13    0.16 
   1   8   0    0.19    0.16 
  -1   8   0   -0.15    0.25 
  -1   8   0   -0.05    0.18 
   1   8   0    0.18    0.25 
  -2  -8   0    0.64    0.15 
  -2  -8   0    0.47    0.17 
   2  -8   0    0.52    0.16 
   2  -8   0    0.44    0.26 
  -2  -8   0    0.54    0.28 
  -2   8   0    0.71    0.24 
  -2   8   0    0.31    0.28 
   2   8   0    0.76    0.24 
   2   8   0    0.72    0.14 
   2   8   0    0.54    0.29 
  -2   8   0    0.39    0.20 
   2   8   0    0.37    0.17 
  -3  -8   0   20.82    0.91 
  -3  -8   0   20.43    0.68 
   3  -8   0   21.32    0.70 
   3   8   0   20.48    0.60 
  -3   8   0   21.73    0.82 
  -3   8   0   20.32    0.73 
   3   8   0   20.63    0.91 
   3   8   0   19.22    0.75 
  -4  -8   0    1.41    0.24 
   4  -8   0    1.72    0.25 
   4  -8   0    2.10    0.37 
  -4  -8   0    2.17    0.22 
  -4  -8   0    2.13    0.42 
   4   8   0    1.99    0.26 
   4   8   0    2.37    0.39 
   4   8   0    2.01    0.38 
  -4   8   0    2.19    0.31 
  -4   8   0    1.91    0.31 
   4   8   0    1.67    0.21 
   5  -8   0    4.20    0.41 
  -5  -8   0    4.32    0.39 
  -5  -8   0    3.81    0.34 
   5  -8   0    4.35    0.57 
  -5  -8   0    3.59    0.35 
  -5  -8   0    2.97    0.50 
   5   8   0    3.38    0.29 
  -5   8   0    4.49    0.44 
  -5   8   0    3.70    0.52 
  -5   8   0    4.60    0.48 
   5   8   0    3.84    0.42 
   5   8   0    4.23    0.46 
   5   8   0    3.89    0.47 
  -6  -8   0    0.21    0.22 
  -6  -8   0    0.27    0.44 
   6  -8   0    0.02    0.27 
  -6  -8   0    0.32    0.37 
  -6  -8   0    0.23    0.26 
   6  -8   0    0.25    0.51 
   6   8   0    0.10    0.30 
  -6   8   0   -0.08    0.36 
   6   8   0    0.75    0.43 
   6   8   0   -0.08    0.37 
   6   8   0    0.22    0.27 
  -6   8   0    0.46    0.49 
  -6   8   0   -0.23    0.25 
  -6   8   0    0.16    0.25 
  -7  -8   0    0.34    0.56 
   7  -8   0    2.50    0.41 
  -7  -8   0    0.62    0.50 
  -7  -8   0    3.12    0.41 
   7  -8   0    3.18    0.71 
  -7   8   0    1.44    0.70 
   7   8   0    1.66    0.47 
   7   8   0    2.37    0.39 
   7   8   0    3.14    0.45 
  -7   8   0    2.45    0.39 
   7   8   0    3.47    0.58 
   0  -9   0    0.19    0.35 
   0  -9   0   -0.16    0.17 
   0   9   0   -0.04    0.19 
   0   9   0    0.00    0.31 
   0   9   0    0.14    0.24 
   1  -9   0    1.57    0.22 
  -1  -9   0    1.44    0.22 
  -1  -9   0    1.36    0.19 
  -1  -9   0    2.05    0.42 
   1  -9   0    1.82    0.19 
   1  -9   0    1.81    0.38 
  -1   9   0    2.07    0.35 
  -1   9   0    1.73    0.56 
   1   9   0    1.73    0.26 
  -1   9   0    1.31    0.24 
   1   9   0    1.97    0.41 
  -2  -9   0   15.74    0.88 
   2  -9   0   13.91    0.49 
  -2  -9   0   15.28    0.53 
   2  -9   0   15.26    0.60 
   2  -9   0   15.49    0.85 
   2   9   0   16.02    0.77 
  -2   9   0   13.92    0.84 
  -2   9   0   15.62    0.65 
   2   9   0   15.98    0.61 
   2   9   0   16.33    0.87 
   3  -9   0   -0.18    0.30 
  -3  -9   0   -0.36    0.36 
   3  -9   0   -0.15    0.18 
   3   9   0    0.35    0.36 
  -3   9   0   -0.19    0.23 
   3   9   0    0.06    0.19 
   3   9   0   -0.06    0.26 
   3   9   0   -0.17    0.15 
   4  -9   0   -0.06    0.21 
  -4  -9   0   -0.05    0.18 
  -4  -9   0   -0.06    0.25 
   4  -9   0   -0.03    0.34 
  -4  -9   0    0.05    0.21 
  -4  -9   0    0.01    0.41 
   4   9   0    0.21    0.21 
  -4   9   0    0.02    0.30 
   4   9   0   -0.11    0.22 
   4   9   0    0.38    0.38 
  -4   9   0    0.16    0.32 
   4   9   0   -0.06    0.29 
  -5  -9   0   -0.37    0.45 
   5  -9   0   -0.11    0.38 
  -5  -9   0   -0.09    0.24 
  -5  -9   0    0.28    0.32 
  -5  -9   0   -0.20    0.20 
   5  -9   0    0.11    0.27 
  -5   9   0    0.11    0.50 
   5   9   0    0.09    0.26 
  -5   9   0   -0.16    0.35 
   5   9   0    0.07    0.26 
  -5   9   0    0.43    0.33 
   5   9   0   -0.07    0.39 
   5   9   0    0.07    0.43 
  -6  -9   0    1.18    0.26 
  -6  -9   0    0.73    0.43 
  -6  -9   0    0.86    0.35 
   6  -9   0    0.79    0.35 
  -6  -9   0    0.14    0.57 
   6  -9   0    1.50    0.63 
   6   9   0    1.06    0.34 
  -6   9   0    0.35    0.36 
  -6   9   0    0.11    0.45 
   6   9   0    1.34    0.47 
   6   9   0    1.03    0.34 
   6   9   0    1.44    0.50 
  -6   9   0    1.36    0.68 
   7  -9   0   -0.77    0.81 
  -7  -9   0    0.18    0.39 
  -7  -9   0   -0.42    0.29 
   7  -9   0    0.52    0.41 
   7   9   0    1.54    0.62 
  -7   9   0    0.88    0.38 
   7   9   0    0.95    0.46 
  -7   9   0   -0.65    0.56 
   7   9   0    1.00    0.42 
   7   9   0    0.85    0.69 
   0 -10   0   14.21    0.62 
   0  10   0   15.11    0.65 
   0  10   0   14.10    0.90 
   1 -10   0    1.87    0.27 
   1 -10   0    1.77    0.47 
  -1 -10   0    2.71    0.52 
  -1 -10   0    2.04    0.27 
   1  10   0    1.91    0.56 
   1  10   0    1.74    0.29 
  -1  10   0    1.71    0.49 
  -1  10   0    1.73    0.30 
  -2 -10   0   -0.13    0.38 
   2 -10   0    0.19    0.37 
   2 -10   0    0.24    0.17 
   2 -10   0    0.64    0.24 
  -2  10   0    0.40    0.41 
  -2  10   0    0.19    0.32 
   2  10   0    0.46    0.30 
   2  10   0   -0.57    0.39 
   2  10   0    0.26    0.24 
  -3 -10   0    1.24    0.29 
  -3 -10   0    1.03    0.26 
   3 -10   0    1.37    0.28 
   3 -10   0    0.79    0.21 
  -3 -10   0    0.99    0.51 
   3 -10   0    0.97    0.35 
  -3  10   0    0.37    0.46 
   3  10   0    1.22    0.22 
   3  10   0    1.03    0.39 
   3  10   0    1.22    0.31 
   3  10   0    0.74    0.45 
  -4 -10   0    1.38    0.33 
  -4 -10   0    1.32    0.55 
  -4 -10   0    0.94    0.23 
   4 -10   0    2.03    0.46 
  -4 -10   0    1.10    0.31 
   4 -10   0    0.96    0.31 
   4  10   0    0.54    0.24 
  -4  10   0    0.26    0.50 
   4  10   0    1.85    0.48 
   4  10   0    1.52    0.32 
   4  10   0    1.81    0.51 
   5 -10   0    1.07    0.53 
  -5 -10   0    1.02    0.27 
   5 -10   0    1.71    0.37 
  -5 -10   0    0.04    0.58 
  -5 -10   0    1.66    0.42 
  -5 -10   0    1.57    0.35 
   5  10   0    2.10    0.55 
   5  10   0    1.20    0.35 
   5  10   0    1.61    0.35 
   5  10   0    1.86    0.55 
  -5  10   0    1.58    0.63 
   6 -10   0    1.48    0.43 
  -6 -10   0   -0.45    0.70 
  -6 -10   0    1.77    0.46 
  -6 -10   0    1.51    0.32 
   6 -10   0    0.51    0.80 
  -6 -10   0    1.61    0.54 
   6  10   0    2.20    0.45 
   6  10   0    1.91    0.41 
   6  10   0    2.85    0.72 
   6  10   0    1.37    0.62 
  -6  10   0   -0.10    0.47 
   0 -11   0    0.01    0.22 
   0 -11   0   -0.47    0.42 
   0 -11   0   -0.18    0.25 
   0  11   0    0.10    0.28 
   0  11   0    0.50    0.50 
   0  11   0    0.15    0.37 
  -1 -11   0   -0.78    0.45 
   1 -11   0    0.30    0.26 
   1 -11   0   -0.08    0.43 
  -1 -11   0   -0.13    0.25 
  -1 -11   0   -0.14    0.24 
   1 -11   0    0.12    0.22 
   1  11   0   -0.38    0.35 
  -1  11   0    0.02    0.48 
   1  11   0   -0.09    0.53 
  -1  11   0    0.07    0.33 
   1  11   0    0.09    0.28 
  -1  11   0    0.34    0.38 
  -2 -11   0    2.53    0.34 
   2 -11   0    3.02    0.56 
   2 -11   0    2.71    0.27 
  -2 -11   0    3.43    0.63 
  -2 -11   0    2.71    0.32 
   2 -11   0    3.09    0.40 
  -2  11   0    2.26    0.62 
   2  11   0    2.99    0.59 
  -2  11   0    2.79    0.42 
   2  11   0    3.17    0.56 
   2  11   0    2.31    0.35 
  -2  11   0    2.58    0.47 
   3 -11   0    1.90    0.55 
   3 -11   0    2.02    0.36 
  -3 -11   0    1.89    0.35 
  -3 -11   0    1.73    0.38 
   3 -11   0    1.76    0.28 
  -3  11   0    1.19    0.45 
  -3  11   0    2.44    0.48 
  -3  11   0    1.53    0.56 
   3  11   0    1.88    0.52 
   3  11   0    1.58    0.59 
   3  11   0    1.96    0.37 
  -4 -11   0    1.03    0.27 
   4 -11   0    1.17    0.40 
  -4 -11   0    1.87    0.43 
   4 -11   0    0.15    0.52 
  -4 -11   0    1.28    0.66 
  -4 -11   0    1.01    0.37 
  -4  11   0    0.85    0.66 
   4  11   0    1.37    0.64 
  -4  11   0    1.61    0.48 
  -4  11   0    1.59    0.49 
   4  11   0    1.95    0.59 
   4  11   0    1.59    0.39 
   4  11   0    1.75    0.31 
   5 -11   0   10.01    0.99 
  -5 -11   0   12.90    0.61 
  -5 -11   0   12.42    0.89 
   5 -11   0   12.55    0.85 
   5  11   0   11.63    0.69 
  -5  11   0   12.60    0.99 
   5  11   0   12.07    1.24 
   5  11   0   12.09    0.83 
   5  11   0   11.06    1.62 
  -5  11   0   12.18    1.05 
   0 -12   0    4.79    0.76 
   0 -12   0    2.63    0.39 
   0 -12   0    2.80    0.35 
   0  12   0    3.82    0.73 
   0  12   0    2.68    0.46 
   0  12   0    3.99    0.59 
  -1 -12   0   -0.73    0.30 
   1 -12   0    0.22    0.59 
  -1 -12   0    0.36    0.33 
   1 -12   0    0.01    0.33 
   1 -12   0    0.05    0.27 
  -1 -12   0    0.00    0.57 
  -1  12   0    0.54    0.40 
   1  12   0   -0.36    0.63 
   1  12   0    0.17    0.51 
  -1  12   0   -0.16    0.46 
  -1  12   0   -0.01    0.62 
   1  12   0   -0.03    0.36 
   2 -12   0   -0.05    0.29 
   2 -12   0   -0.41    0.58 
  -2 -12   0   -0.68    0.60 
  -2 -12   0    0.75    0.31 
   2 -12   0    0.36    0.37 
  -2 -12   0    0.27    0.34 
  -2  12   0   -0.03    0.63 
  -2  12   0    1.20    0.59 
   2  12   0    0.41    0.69 
  -2  12   0    0.50    0.47 
   2  12   0    0.14    0.40 
   2  12   0    0.07    0.47 
  -3 -12   0    0.56    0.40 
  -3 -12   0    0.25    0.71 
   3 -12   0    0.14    0.42 
   3 -12   0   -0.65    0.58 
  -3 -12   0    0.16    0.43 
   3 -12   0    0.74    0.30 
  -3  12   0   -0.77    0.73 
  -3  12   0    0.33    0.51 
   3  12   0    0.23    0.40 
  -3  12   0    0.36    0.55 
   3  12   0    0.06    0.58 
   3  12   0   -1.82    0.65 
   4 -12   0    1.53    0.53 
  -4 -12   0    2.42    0.81 
   4 -12   0   -0.64    0.59 
  -4 -12   0    1.02    0.31 
  -4  12   0    1.79    0.67 
  -4  12   0    1.99    0.63 
   4  12   0    1.72    0.81 
   4  12   0    1.02    0.48 
   0 -13   0   -0.76    0.44 
   0 -13   0    0.25    0.41 
   0 -13   0   -0.03    0.71 
   0  13   0   -0.48    0.50 
   0  13   0   -0.53    0.87 
   1 -13   0   -0.06    0.70 
  -1 -13   0    0.52    0.43 
   1 -13   0   -0.28    0.43 
  -1 -13   0    0.20    0.82 
   1  13   0   -0.40    0.44 
   1  13   0   -1.17    0.75 
  -1  13   0    0.38    0.50 
  -1  13   0   -0.66    0.80 
  -1  13   0    0.27    0.94 
   2 -13   0    0.36    0.71 
  -2 -13   0   -0.36    0.75 
   2 -13   0    0.35    0.49 
   2  13   0   -0.23    0.46 
   2  13   0    0.92    0.84 
  -2  13   0    1.35    0.57 
  -2  13   0    1.69    0.81 
   3 -13   0    0.43    0.53 
  -3  13   0    0.52    0.63 
   9   0  -1   -0.09    0.30 
   9   0  -1    0.00    0.22 
  -9   0   1   -0.19    0.26 
   9   0  -1   -0.57    0.49 
  -9   0   1   -0.34    0.40 
  -8   0   1   -0.35    0.30 
   8   0  -1    0.02    0.17 
  -8   0   1    0.10    0.24 
   8   0  -1    0.10    0.21 
  -8   0   1    0.62    0.34 
   8   0  -1    0.43    0.34 
   7   0  -1    0.48    0.18 
  -7   0   1    0.13    0.21 
   7   0  -1    0.23    0.14 
  -7   0   1    0.06    0.13 
   7   0  -1    0.08    0.24 
  -6   0   1   -0.12    0.13 
   6   0  -1   -0.12    0.10 
  -6   0   1   -0.25    0.18 
   6   0  -1    0.09    0.18 
  -6   0   1    0.11    0.17 
   6   0  -1    0.05    0.13 
   5   0  -1   25.49    0.72 
   5   0  -1   26.64    0.72 
  -5   0   1   26.43    0.84 
  -5   0   1   27.46    0.78 
  -5   0   1   26.99    0.76 
   5   0  -1   27.51    0.75 
   5   0  -1   26.89    0.71 
   4   0  -1    0.12    0.11 
  -4   0   1   -0.07    0.10 
  -4   0   1   -0.03    0.08 
   4   0  -1    0.08    0.07 
   4   0  -1   -0.08    0.07 
   4   0  -1    0.06    0.08 
  -4   0   1    0.13    0.10 
  -3   0   1    3.45    0.19 
   3   0  -1    3.48    0.16 
  -3   0   1    3.52    0.22 
   3   0  -1    3.44    0.14 
   3   0  -1    3.49    0.16 
  -3   0   1    3.71    0.17 
   3   0  -1    3.79    0.18 
   2   0  -1   -0.05    0.05 
   2   0  -1   -0.02    0.03 
  -2   0   1   -0.08    0.05 
  -2   0   1   -0.05    0.05 
   2   0  -1    0.02    0.04 
   2   0  -1    0.06    0.05 
  -1   0   1   78.81    1.94 
   1   0  -1   83.52    1.94 
   1   0  -1   84.33    1.95 
  -1   0   1   83.36    1.95 
   1   0  -1   86.91    1.95 
   1   0  -1   86.38    1.94 
  -1   0   1   89.71    1.94 
   1   0   1    0.64    0.06 
   1   0   1    0.55    0.03 
   1   0   1    0.56    0.04 
  -1   0  -1    0.49    0.04 
   1   0   1    0.47    0.04 
  -1   0  -1    0.50    0.05 
   2   0   1    0.03    0.03 
  -2   0  -1    0.10    0.04 
  -2   0  -1    0.04    0.04 
   2   0   1   -0.02    0.03 
   2   0   1   -0.02    0.04 
  -2   0  -1   -0.07    0.05 
   2   0   1   -0.07    0.05 
   3   0   1    5.07    0.19 
   3   0   1    4.50    0.18 
   3   0   1    5.21    0.17 
   3   0   1    4.81    0.21 
  -3   0  -1    5.31    0.21 
   3   0   1    5.28    0.17 
  -3   0  -1    5.54    0.22 
   4   0   1   -0.02    0.05 
   4   0   1    0.03    0.10 
  -4   0  -1   -0.04    0.09 
   4   0   1    0.08    0.06 
   4   0   1    0.02    0.10 
   4   0   1   -0.03    0.06 
  -4   0  -1    0.00    0.09 
   5   0   1   14.91    0.39 
  -5   0  -1   14.46    0.48 
   5   0   1   13.93    0.47 
   5   0   1   14.34    0.42 
  -5   0  -1   13.88    0.48 
   5   0   1   14.66    0.42 
   5   0   1   14.62    0.49 
  -6   0  -1    0.24    0.15 
  -6   0  -1   -0.04    0.12 
   6   0   1   -0.05    0.11 
   6   0   1    0.07    0.09 
   6   0   1    0.07    0.18 
   7   0   1    6.12    0.48 
   7   0   1    6.21    0.33 
  -7   0  -1    5.63    0.36 
  -7   0  -1    5.84    0.42 
   8   0   1   -0.02    0.20 
   8   0   1    0.00    0.17 
   8   0   1   -0.13    0.33 
  -8   0  -1   -0.44    0.23 
  -8   0  -1   -0.62    0.22 
   9   0   1   -0.26    0.23 
   9   0   1   -0.21    0.21 
   9   0   1   -0.28    0.49 
  -9   0  -1    0.21    0.33 
  -9   0  -1    0.06    0.28 
  -9   0  -1    0.51    0.28 
  -9  -1   1   -0.38    0.38 
   9  -1  -1    1.35    0.25 
  -9  -1   1    0.61    0.42 
   9  -1  -1    0.72    0.33 
  -9  -1   1    0.27    0.33 
   9  -1  -1    0.31    0.52 
  -9   1   1    1.58    0.46 
  -9   1   1    0.03    0.48 
  -9   1   1    0.57    0.31 
   9   1  -1    0.33    0.51 
   9   1  -1    0.75    0.30 
  -8  -1   1    0.12    0.25 
   8  -1  -1    0.23    0.36 
   8  -1  -1    0.20    0.24 
   8  -1  -1   -0.21    0.16 
  -8  -1   1    0.29    0.31 
  -8   1   1   -0.12    0.30 
   8   1  -1    0.36    0.18 
  -8   1   1    0.34    0.25 
   8   1  -1    0.10    0.36 
   8   1  -1    0.30    0.21 
  -7  -1   1    0.14    0.23 
   7  -1  -1   -0.20    0.26 
  -7  -1   1   -0.03    0.15 
   7  -1  -1    0.07    0.17 
  -7  -1   1    0.09    0.25 
   7  -1  -1   -0.03    0.14 
  -7   1   1   -0.10    0.15 
   7   1  -1    0.11    0.17 
   7   1  -1    0.14    0.15 
  -7   1   1    0.23    0.25 
  -7   1   1    0.10    0.23 
   7   1  -1   -0.26    0.26 
  -6  -1   1    0.47    0.18 
   6  -1  -1    0.28    0.11 
   6  -1  -1    0.11    0.18 
  -6  -1   1    0.53    0.24 
  -6  -1   1    0.25    0.12 
   6  -1  -1    0.25    0.14 
   6   1  -1    0.40    0.14 
  -6   1   1    0.50    0.19 
  -6   1   1    0.36    0.19 
   6   1  -1    0.39    0.20 
   6   1  -1    0.33    0.19 
  -6   1   1    0.46    0.15 
   6   1  -1    0.32    0.12 
   5  -1  -1    0.09    0.12 
   5  -1  -1    0.12    0.15 
  -5  -1   1    0.25    0.15 
  -5  -1   1    0.04    0.09 
   5  -1  -1    0.15    0.09 
  -5  -1   1   -0.18    0.14 
   5  -1  -1    0.03    0.15 
   5   1  -1    0.11    0.10 
   5   1  -1    0.31    0.10 
   5   1  -1    0.13    0.07 
  -5   1   1    0.17    0.13 
  -5   1   1    0.13    0.10 
   5   1  -1    0.23    0.13 
   5   1  -1    0.29    0.15 
  -5   1   1    0.08    0.13 
  -4  -1   1    0.95    0.15 
   4  -1  -1    0.77    0.10 
  -4  -1   1    0.82    0.12 
  -4  -1   1    0.87    0.11 
   4  -1  -1    0.95    0.12 
   4  -1  -1    0.86    0.14 
   4  -1  -1    0.85    0.12 
  -4   1   1    1.07    0.15 
  -4   1   1    0.91    0.12 
   4   1  -1    0.87    0.13 
   4   1  -1    0.85    0.10 
   4   1  -1    0.73    0.08 
  -4   1   1    0.90    0.13 
   4   1  -1    0.93    0.11 
   4   1  -1    0.71    0.11 
  -3  -1   1   79.61    1.85 
  -3  -1   1   83.94    1.90 
   3  -1  -1   79.92    1.89 
  -3  -1   1   81.98    1.88 
  -3  -1   1   82.30    1.93 
  -3  -1   1   81.28    1.89 
  -3   1   1   82.74    1.91 
  -3   1   1   78.08    1.97 
   3   1  -1   76.90    1.87 
   3   1  -1   80.18    1.87 
   3   1  -1   81.70    1.91 
   3   1  -1   84.83    1.85 
  -3   1   1   83.92    1.90 
   3   1  -1   80.10    1.88 
  -2  -1   1  426.08    9.75 
  -2  -1   1  434.77    9.69 
   2  -1  -1  444.04    9.89 
   2  -1  -1  438.61    9.79 
  -2  -1   1  425.37    9.74 
  -2  -1   1  449.42    9.82 
  -2  -1   1  449.44    9.86 
  -2   1   1  399.86    9.68 
  -2   1   1  393.76    9.65 
   2   1  -1  425.24    9.81 
  -2   1   1  424.17    9.72 
   2   1  -1  424.91    9.72 
   2   1  -1  422.76    9.77 
   2   1  -1  450.61    9.70 
  -2   1   1  441.79    9.79 
   2   1  -1  449.57    9.87 
  -1  -1   1   30.83    0.73 
  -1  -1   1   28.67    0.69 
  -1  -1   1   30.78    0.70 
  -1  -1   1   30.45    0.69 
   1  -1  -1   29.33    0.75 
  -1  -1   1   30.57    0.68 
   1   1  -1   29.54    0.72 
  -1   1   1   28.17    0.74 
  -1   1   1   29.50    0.71 
   1   1  -1   28.95    0.69 
   1   1  -1   29.97    0.70 
   1   1  -1   31.31    0.73 
   0  -1   1   41.79    0.99 
   0  -1   1   40.95    0.94 
   0  -1   1   43.72    0.96 
   0   1  -1   40.20    0.93 
   0   1   1   40.04    0.94 
   0   1   1   38.35    1.00 
  -1  -1  -1    6.15    0.18 
  -1  -1  -1    5.72    0.17 
   1  -1   1    7.02    0.22 
   1  -1   1    6.92    0.21 
  -1  -1  -1    7.03    0.18 
   1  -1   1    7.16    0.18 
  -1  -1  -1    7.08    0.20 
   1   1   1    7.18    0.18 
   1   1   1    6.81    0.20 
  -1   1  -1    6.77    0.22 
   1   1   1    7.27    0.18 
  -1   1  -1    6.88    0.18 
   1   1   1    6.80    0.18 
   1   1   1    7.07    0.21 
  -2  -1  -1   25.80    0.60 
   2  -1   1   25.74    0.61 
  -2  -1  -1   25.28    0.63 
   2  -1   1   24.88    0.65 
  -2  -1  -1   25.40    0.59 
   2  -1   1   25.66    0.60 
  -2  -1  -1   24.54    0.61 
   2   1   1   25.09    0.60 
  -2   1  -1   25.50    0.62 
   2   1   1   25.50    0.61 
  -2   1  -1   25.49    0.60 
   2   1   1   24.67    0.59 
   2   1   1   22.25    0.63 
  -2   1  -1   24.29    0.64 
   3  -1   1    0.38    0.08 
  -3  -1  -1    0.38    0.07 
   3  -1   1    0.33    0.05 
  -3  -1  -1    0.46    0.08 
   3  -1   1    0.30    0.09 
  -3  -1  -1    0.35    0.06 
   3  -1   1    0.29    0.05 
   3   1   1    0.34    0.08 
   3   1   1    0.29    0.06 
  -3   1  -1    0.40    0.08 
   3   1   1    0.49    0.08 
   3   1   1    0.31    0.06 
  -3   1  -1    0.52    0.10 
  -4  -1  -1   34.37    0.90 
   4  -1   1   33.56    0.83 
   4  -1   1   34.55    0.85 
   4  -1   1   34.04    0.81 
   4  -1   1   34.71    0.85 
  -4  -1  -1   33.54    0.89 
  -4  -1  -1   32.83    0.83 
  -4   1  -1   33.97    0.89 
  -4   1  -1   32.95    0.90 
   4   1   1   34.44    0.84 
   4   1   1   33.45    0.86 
   4   1   1   33.43    0.82 
   4   1   1   34.40    0.84 
   5  -1   1    4.49    0.20 
  -5  -1  -1    4.13    0.29 
  -5  -1  -1    4.39    0.26 
   5  -1   1    4.80    0.30 
   5  -1   1    4.36    0.23 
   5  -1   1    4.73    0.31 
   5   1   1    4.66    0.28 
   5   1   1    4.62    0.22 
   5   1   1    4.45    0.21 
  -5   1  -1    4.74    0.30 
  -5   1  -1    4.78    0.27 
   5   1   1    4.83    0.29 
   5   1   1    4.56    0.21 
   6  -1   1    0.24    0.19 
  -6  -1  -1   -0.01    0.17 
  -6  -1  -1   -0.03    0.16 
   6  -1   1    0.14    0.13 
   6  -1   1   -0.02    0.09 
  -6  -1  -1    0.02    0.12 
   6   1   1    0.13    0.11 
  -6   1  -1    0.14    0.17 
  -6   1  -1    0.21    0.15 
   6   1   1    0.02    0.09 
   6   1   1    0.12    0.20 
   6   1   1    0.04    0.09 
  -7  -1  -1    0.14    0.19 
   7  -1   1    0.40    0.16 
  -7  -1  -1    0.08    0.14 
  -7  -1  -1    0.15    0.20 
   7  -1   1    0.09    0.27 
   7  -1   1    0.23    0.12 
  -7   1  -1    0.19    0.22 
   7   1   1    0.33    0.15 
   7   1   1    0.20    0.26 
  -7   1  -1   -0.28    0.20 
  -7   1  -1    0.16    0.17 
   7   1   1    0.17    0.14 
  -8  -1  -1   -0.18    0.24 
  -8  -1  -1    0.89    0.27 
   8  -1   1    0.40    0.37 
  -8  -1  -1    0.50    0.28 
   8  -1   1    0.75    0.19 
   8  -1   1    1.09    0.27 
  -8   1  -1    0.74    0.27 
  -8   1  -1    0.00    0.23 
  -8   1  -1    0.93    0.30 
   8   1   1    0.74    0.19 
   8   1   1    0.84    0.19 
   8   1   1    0.54    0.38 
  -9  -1  -1    0.03    0.28 
   9  -1   1    0.06    0.23 
  -9  -1  -1   -0.04    0.25 
   9  -1   1    0.01    0.26 
   9  -1   1    0.24    0.50 
   9   1   1   -0.25    0.48 
  -9   1  -1    0.09    0.29 
   9   1   1   -0.09    0.21 
   9   1   1   -0.02    0.22 
  -9   1  -1   -0.38    0.43 
  -9  -2   1    0.05    0.29 
   9  -2  -1    0.04    0.55 
   9  -2  -1   -0.09    0.35 
  -9  -2   1    0.38    0.41 
  -9  -2   1    0.41    0.63 
   9  -2  -1    0.33    0.24 
  -9   2   1    0.28    0.30 
   9   2  -1    0.12    0.29 
   9   2  -1   -0.36    0.49 
  -9   2   1    0.18    0.47 
  -8  -2   1    2.78    0.35 
   8  -2  -1    3.33    0.34 
   8  -2  -1    2.60    0.43 
   8  -2  -1    3.20    0.33 
   8   2  -1    2.89    0.28 
  -8   2   1    2.44    0.49 
   8   2  -1    3.10    0.29 
  -8   2   1    3.47    0.40 
   8   2  -1    2.55    0.40 
  -7  -2   1   -0.16    0.30 
  -7  -2   1   -0.08    0.14 
   7  -2  -1    0.35    0.28 
   7  -2  -1   -0.18    0.13 
   7  -2  -1   -0.21    0.19 
  -7  -2   1    0.08    0.23 
  -7   2   1   -0.09    0.16 
   7   2  -1   -0.11    0.26 
   7   2  -1    0.15    0.16 
   7   2  -1   -0.08    0.16 
  -7   2   1    0.18    0.24 
  -7   2   1   -0.13    0.27 
  -6  -2   1    8.94    0.48 
   6  -2  -1    8.21    0.41 
   6  -2  -1    7.38    0.33 
  -6  -2   1    7.84    0.37 
  -6  -2   1    8.14    0.48 
   6  -2  -1    7.73    0.44 
   6   2  -1    6.85    0.39 
  -6   2   1    8.34    0.43 
   6   2  -1    7.89    0.41 
  -6   2   1    8.69    0.49 
   6   2  -1    7.62    0.35 
   6   2  -1    7.99    0.36 
   6   2  -1    8.23    0.31 
  -6   2   1    7.90    0.39 
  -5  -2   1    0.97    0.18 
  -5  -2   1    0.65    0.13 
   5  -2  -1    0.67    0.19 
   5  -2  -1    0.76    0.17 
   5  -2  -1    0.61    0.11 
  -5  -2   1    0.56    0.12 
   5   2  -1    0.61    0.12 
   5   2  -1    0.98    0.17 
   5   2  -1    0.75    0.13 
  -5   2   1    0.71    0.15 
  -5   2   1    0.55    0.17 
  -5   2   1    0.77    0.14 
   5   2  -1    0.78    0.12 
   5   2  -1    0.89    0.15 
  -4  -2   1    6.35    0.22 
  -4  -2   1    6.51    0.27 
   4  -2  -1    6.41    0.26 
  -4  -2   1    6.45    0.33 
  -4  -2   1    6.84    0.26 
   4  -2  -1    6.71    0.37 
  -4  -2   1    6.48    0.28 
   4   2  -1    6.03    0.26 
   4   2  -1    6.69    0.26 
  -4   2   1    6.43    0.28 
  -4   2   1    6.90    0.30 
   4   2  -1    6.86    0.28 
  -4   2   1    6.44    0.34 
   4   2  -1    6.77    0.24 
   4   2  -1    6.39    0.29 
  -3  -2   1    0.03    0.06 
  -3  -2   1    0.05    0.05 
  -3  -2   1    0.01    0.06 
  -3  -2   1    0.02    0.08 
  -3  -2   1    0.09    0.10 
   3  -2  -1    0.08    0.10 
   3  -2  -1    0.06    0.06 
   3   2  -1    0.08    0.07 
   3   2  -1    0.18    0.07 
   3   2  -1    0.04    0.06 
  -3   2   1    0.04    0.04 
   3   2  -1    0.03    0.08 
  -3   2   1   -0.02    0.07 
   3   2  -1   -0.02    0.06 
  -3   2   1    0.07    0.09 
  -2  -2   1    9.46    0.28 
  -2  -2   1    9.95    0.34 
   2  -2  -1    9.27    0.36 
  -2  -2   1    9.81    0.29 
  -2  -2   1   10.22    0.26 
   2  -2  -1    9.99    0.29 
  -2   2   1    9.67    0.29 
  -2   2   1    9.77    0.36 
   2   2  -1   10.17    0.29 
  -2   2   1   10.08    0.30 
   2   2  -1    9.97    0.32 
   2   2  -1    9.86    0.33 
   2   2  -1    9.64    0.28 
  -1  -2   1    1.32    0.08 
  -1  -2   1    1.41    0.09 
   1  -2  -1    1.68    0.10 
  -1  -2   1    1.05    0.12 
   1  -2  -1    1.67    0.15 
   1   2  -1    1.43    0.09 
   1   2  -1    1.37    0.08 
  -1   2   1    1.21    0.13 
  -1   2   1    1.28    0.09 
   1   2  -1    1.29    0.13 
   1   2  -1    1.37    0.12 
   0  -2   1  100.08    2.31 
   0  -2  -1  103.20    2.31 
   0  -2   1  102.64    2.36 
   0  -2   1  105.49    2.31 
   0  -2   1  105.37    2.38 
   0  -2  -1  101.09    2.31 
   0  -2  -1   99.28    2.37 
   0   2   1  101.29    2.31 
   0   2  -1  100.92    2.37 
   0   2   1   99.76    2.37 
   0   2  -1   99.75    2.35 
   0   2  -1  105.90    2.32 
  -1  -2  -1   58.33    1.31 
   1  -2   1   59.02    1.40 
  -1  -2  -1   58.72    1.38 
   1  -2   1   59.92    1.37 
   1  -2   1   56.20    1.33 
  -1  -2  -1   57.57    1.32 
   1   2   1   56.70    1.31 
  -1   2  -1   54.61    1.39 
  -1   2  -1   58.54    1.33 
   1   2   1   56.68    1.32 
  -1   2  -1   56.03    1.36 
   1   2   1   58.25    1.38 
  -2  -2  -1    0.99    0.11 
  -2  -2  -1    0.86    0.08 
  -2  -2  -1    0.87    0.07 
   2  -2   1    0.90    0.09 
  -2  -2  -1    0.81    0.07 
   2  -2   1    0.67    0.10 
   2  -2   1    0.71    0.07 
  -2   2  -1    0.94    0.09 
  -2   2  -1    0.84    0.09 
  -2   2  -1    0.59    0.10 
   2   2   1    0.68    0.09 
   2   2   1    0.66    0.06 
   2   2   1    0.76    0.07 
   3  -2   1    1.86    0.12 
   3  -2   1    1.79    0.12 
  -3  -2  -1    1.86    0.11 
  -3  -2  -1    1.98    0.14 
  -3  -2  -1    1.76    0.15 
  -3  -2  -1    1.65    0.12 
   3  -2   1    1.43    0.17 
  -3   2  -1    1.97    0.14 
   3   2   1    1.94    0.14 
   3   2   1    1.83    0.12 
  -3   2  -1    1.70    0.18 
  -3   2  -1    1.71    0.15 
  -3   2  -1    1.87    0.12 
   3   2   1    1.97    0.14 
   3   2   1    1.50    0.14 
  -4  -2  -1   14.79    0.48 
   4  -2   1   15.79    0.43 
   4  -2   1   15.48    0.56 
  -4  -2  -1   15.66    0.44 
  -4  -2  -1   15.19    0.47 
   4  -2   1   15.80    0.44 
   4  -2   1   16.21    0.48 
  -4  -2  -1   16.09    0.44 
  -4   2  -1   15.87    0.49 
   4   2   1   16.43    0.45 
  -4   2  -1   15.66    0.47 
   4   2   1   15.61    0.46 
  -4   2  -1   15.98    0.41 
   4   2   1   15.62    0.43 
   4   2   1   15.63    0.46 
  -4   2  -1   15.37    0.54 
  -5  -2  -1   12.09    0.39 
   5  -2   1   13.30    0.44 
  -5  -2  -1   12.51    0.45 
   5  -2   1   12.94    0.39 
   5   2   1   12.76    0.44 
   5   2   1   12.34    0.45 
  -5   2  -1   13.05    0.45 
   5   2   1   12.40    0.41 
   5   2   1   12.20    0.38 
  -5   2  -1   12.76    0.50 
  -5   2  -1   12.45    0.45 
  -6  -2  -1    0.22    0.17 
  -6  -2  -1    0.18    0.13 
   6  -2   1    0.25    0.10 
   6  -2   1    0.02    0.15 
   6  -2   1   -0.08    0.20 
  -6   2  -1    0.12    0.17 
  -6   2  -1   -0.03    0.19 
  -6   2  -1   -0.05    0.13 
   6   2   1    0.11    0.11 
   6   2   1    0.10    0.19 
   6   2   1    0.23    0.13 
   6   2   1    0.00    0.11 
   7  -2   1    0.01    0.18 
   7  -2   1    0.12    0.13 
   7  -2   1   -0.07    0.27 
  -7  -2  -1   -0.17    0.15 
  -7  -2  -1    0.20    0.23 
  -7  -2  -1   -0.07    0.20 
   7   2   1    0.08    0.13 
  -7   2  -1    0.02    0.25 
   7   2   1   -0.04    0.15 
   7   2   1   -0.20    0.12 
  -7   2  -1   -0.14    0.17 
  -7   2  -1    0.05    0.33 
   7   2   1    0.03    0.16 
   7   2   1   -0.04    0.26 
   8  -2   1    0.30    0.23 
   8  -2   1    0.22    0.21 
  -8  -2  -1   -0.47    0.25 
   8  -2   1    0.05    0.37 
  -8  -2  -1    0.41    0.24 
  -8   2  -1    0.20    0.26 
  -8   2  -1   -0.13    0.25 
  -8   2  -1    0.07    0.32 
   8   2   1    0.05    0.36 
   8   2   1    0.06    0.19 
   9  -2   1    1.29    0.33 
  -9  -2  -1    1.42    0.34 
   9  -2   1    0.94    0.57 
   9  -2   1    1.52    0.27 
  -9  -2  -1   -0.19    0.38 
  -9   2  -1    0.04    0.43 
   9   2   1    1.40    0.53 
   9   2   1    1.40    0.24 
   9   2   1    1.25    0.25 
  -9   2  -1    1.13    0.33 
   9  -3  -1    0.01    0.27 
   9  -3  -1   -0.22    0.37 
   9  -3  -1   -0.20    0.55 
   9   3  -1   -0.45    0.50 
  -9   3   1    0.20    0.31 
   9   3  -1    0.25    0.30 
  -9   3   1   -0.03    0.51 
   8  -3  -1    0.26    0.21 
  -8  -3   1   -0.04    0.26 
  -8  -3   1    0.14    0.34 
   8  -3  -1   -0.05    0.28 
   8  -3  -1    0.26    0.40 
  -8   3   1    0.22    0.40 
  -8   3   1   -0.24    0.33 
  -8   3   1    0.21    0.27 
   8   3  -1    0.43    0.21 
   8   3  -1    0.06    0.37 
   8   3  -1    0.09    0.22 
   7  -3  -1   -0.04    0.14 
  -7  -3   1   -0.64    0.26 
  -7  -3   1   -0.28    0.15 
  -7  -3   1   -0.24    0.25 
   7  -3  -1    0.01    0.23 
   7  -3  -1    0.06    0.28 
   7   3  -1    0.07    0.14 
  -7   3   1   -0.09    0.23 
   7   3  -1   -0.04    0.18 
  -7   3   1    0.18    0.30 
   7   3  -1   -0.06    0.17 
  -7   3   1   -0.13    0.14 
   7   3  -1   -0.49    0.25 
   6  -3  -1    1.86    0.19 
  -6  -3   1    2.07    0.28 
  -6  -3   1    1.75    0.21 
  -6  -3   1    1.73    0.21 
   6  -3  -1    1.76    0.25 
   6   3  -1    1.65    0.19 
  -6   3   1    1.46    0.31 
  -6   3   1    1.35    0.20 
   6   3  -1    1.39    0.22 
   6   3  -1    1.81    0.19 
  -6   3   1    1.43    0.24 
   6   3  -1    1.78    0.21 
  -5  -3   1    1.98    0.20 
  -5  -3   1    1.72    0.19 
  -5  -3   1    2.04    0.25 
  -5  -3   1    2.09    0.17 
   5  -3  -1    1.93    0.28 
  -5  -3   1    2.48    0.21 
   5  -3  -1    2.04    0.19 
   5   3  -1    1.94    0.21 
  -5   3   1    1.74    0.25 
  -5   3   1    1.97    0.21 
   5   3  -1    2.11    0.21 
   5   3  -1    2.08    0.21 
   5   3  -1    2.24    0.23 
  -5   3   1    1.69    0.20 
  -4  -3   1    0.65    0.10 
  -4  -3   1    0.54    0.12 
  -4  -3   1    0.59    0.09 
  -4  -3   1    0.57    0.16 
   4  -3  -1    0.62    0.11 
  -4  -3   1    0.77    0.12 
   4  -3  -1    0.44    0.18 
  -4   3   1    0.76    0.16 
  -4   3   1    0.68    0.08 
   4   3  -1    0.76    0.14 
  -4   3   1    0.80    0.14 
   4   3  -1    0.61    0.11 
  -4   3   1    0.64    0.13 
   4   3  -1    0.60    0.12 
   4   3  -1    0.52    0.13 
   3  -3  -1   75.74    1.95 
  -3  -3   1   77.21    1.75 
  -3  -3   1   76.44    1.80 
   3  -3  -1   74.89    1.80 
  -3  -3   1   77.52    1.89 
  -3  -3   1   76.21    1.78 
   3   3  -1   77.62    1.77 
  -3   3   1   75.56    1.92 
  -3   3   1   76.25    1.80 
   3   3  -1   76.66    1.79 
   3   3  -1   75.78    1.86 
   3   3  -1   77.11    1.87 
  -3   3   1   76.06    1.82 
  -2  -3   1   23.85    0.70 
  -2  -3   1   23.69    0.59 
   2  -3  -1   24.47    0.62 
  -2  -3   1   23.05    0.61 
  -2   3   1   23.52    0.63 
   2   3  -1   23.34    0.58 
   2   3  -1   23.18    0.67 
   2   3  -1   24.39    0.69 
  -2   3   1   23.60    0.72 
   2   3  -1   23.47    0.61 
  -2   3   1   22.91    0.63 
  -1  -3   1    3.31    0.21 
  -1  -3   1    3.34    0.14 
   1  -3  -1    3.16    0.14 
  -1  -3   1    3.00    0.12 
   1  -3  -1    3.32    0.21 
   1   3  -1    3.40    0.15 
  -1   3   1    3.17    0.22 
   1   3  -1    3.20    0.12 
  -1   3   1    3.27    0.15 
   1   3  -1    3.36    0.19 
   1   3  -1    3.31    0.21 
   0  -3  -1   22.21    0.53 
   0  -3   1   22.32    0.53 
   0  -3   1   22.06    0.65 
   0  -3  -1   21.51    0.56 
   0  -3  -1   20.86    0.64 
   0  -3   1   22.67    0.57 
   0   3   1   22.54    0.57 
   0   3  -1   22.19    0.65 
   0   3  -1   22.07    0.62 
   0   3  -1   22.04    0.57 
   0   3   1   22.53    0.65 
  -1  -3  -1   27.02    0.75 
   1  -3   1   27.90    0.77 
   1  -3   1   27.09    0.73 
  -1  -3  -1   27.66    0.64 
  -1  -3  -1   27.44    0.67 
   1  -3   1   26.72    0.68 
   1   3   1   27.80    0.64 
  -1   3  -1   26.54    0.72 
   1   3   1   26.70    0.67 
   1   3   1   26.70    0.75 
  -1   3  -1   26.06    0.76 
  -1   3  -1   26.75    0.68 
  -2  -3  -1   23.53    0.60 
   2  -3   1   23.82    0.62 
  -2  -3  -1   24.17    0.59 
  -2  -3  -1   24.38    0.61 
  -2  -3  -1   23.08    0.69 
   2  -3   1   24.51    0.72 
   2  -3   1   25.31    0.67 
   2   3   1   24.38    0.61 
   2   3   1   24.14    0.59 
  -2   3  -1   23.92    0.65 
  -2   3  -1   24.12    0.62 
   2   3   1   24.37    0.69 
  -2   3  -1   23.68    0.71 
  -3  -3  -1    4.13    0.18 
  -3  -3  -1    4.06    0.18 
  -3  -3  -1    4.22    0.20 
   3  -3   1    3.97    0.25 
   3  -3   1    4.07    0.19 
   3  -3   1    4.28    0.21 
  -3  -3  -1    4.18    0.25 
   3   3   1    4.48    0.20 
  -3   3  -1    4.34    0.21 
   3   3   1    4.41    0.18 
  -3   3  -1    4.38    0.29 
  -3   3  -1    4.58    0.21 
   3   3   1    4.40    0.24 
   4  -3   1   10.11    0.46 
  -4  -3  -1   10.62    0.37 
  -4  -3  -1    9.74    0.32 
  -4  -3  -1    9.31    0.31 
   4  -3   1   10.04    0.33 
  -4  -3  -1    9.82    0.41 
   4   3   1   10.08    0.35 
  -4   3  -1   10.18    0.32 
  -4   3  -1    9.47    0.44 
   4   3   1   10.05    0.32 
  -4   3  -1   10.23    0.36 
  -4   3  -1    9.61    0.37 
   4   3   1    9.81    0.37 
  -5  -3  -1    7.41    0.34 
   5  -3   1    7.38    0.30 
  -5  -3  -1    8.00    0.31 
   5  -3   1    7.09    0.46 
  -5  -3  -1    7.91    0.37 
  -5  -3  -1    7.71    0.29 
  -5   3  -1    7.41    0.25 
   5   3   1    7.78    0.34 
   5   3   1    7.23    0.33 
  -5   3  -1    7.02    0.34 
  -5   3  -1    7.81    0.36 
  -5   3  -1    7.73    0.43 
   5   3   1    7.79    0.29 
  -6  -3  -1    0.31    0.14 
  -6  -3  -1    0.20    0.14 
   6  -3   1    0.16    0.11 
   6  -3   1    0.17    0.19 
  -6   3  -1    0.23    0.16 
   6   3   1    0.00    0.18 
  -6   3  -1    0.15    0.17 
   6   3   1    0.19    0.12 
   6   3   1    0.08    0.13 
  -6   3  -1    0.02    0.21 
   6   3   1    0.29    0.17 
   7  -3   1    1.32    0.33 
  -7  -3  -1    1.66    0.28 
   7  -3   1    1.38    0.19 
  -7  -3  -1    1.46    0.23 
  -7   3  -1    1.05    0.22 
   7   3   1    1.80    0.22 
   7   3   1    1.81    0.20 
  -7   3  -1    1.25    0.32 
   7   3   1    1.31    0.28 
  -8  -3  -1    2.30    0.35 
  -8  -3  -1    1.91    0.33 
   8  -3   1    2.28    0.32 
   8  -3   1    2.38    0.25 
   8  -3   1    3.24    0.49 
   8   3   1    2.58    0.24 
   8   3   1    2.24    0.26 
   8   3   1    2.91    0.29 
   8   3   1    1.90    0.20 
  -8   3  -1    2.43    0.39 
   8   3   1    2.45    0.40 
   9  -3   1    0.62    0.58 
   9  -3   1    0.91    0.36 
  -9  -3  -1    0.25    0.28 
  -9   3  -1    0.87    0.49 
   9   3   1    0.67    0.25 
   9   3   1    0.61    0.26 
  -9   3  -1    0.39    0.35 
   9   3   1   -0.09    0.52 
  -9  -4   1    0.31    0.54 
   9  -4  -1    1.11    0.45 
   9  -4  -1    1.00    0.62 
   9   4  -1    1.77    0.36 
  -9   4   1    1.08    0.36 
  -9   4   1    1.21    0.64 
   9   4  -1    0.56    0.56 
   8  -4  -1    0.39    0.23 
   8  -4  -1   -0.03    0.34 
   8  -4  -1   -0.04    0.42 
  -8  -4   1    0.23    0.38 
  -8  -4   1    0.02    0.40 
   8   4  -1    0.34    0.26 
  -8   4   1    0.27    0.27 
   8   4  -1    0.31    0.39 
   8   4  -1    0.17    0.21 
   8   4  -1    0.25    0.25 
  -8   4   1   -0.12    0.39 
  -8   4   1    0.55    0.48 
   7  -4  -1    1.28    0.31 
   7  -4  -1    0.88    0.21 
   7  -4  -1    0.74    0.33 
  -7  -4   1    1.07    0.25 
  -7   4   1    0.06    0.26 
   7   4  -1    1.00    0.30 
  -7   4   1    0.95    0.23 
   7   4  -1    1.46    0.24 
   7   4  -1    1.16    0.22 
   7   4  -1    1.22    0.24 
  -6  -4   1    0.15    0.13 
  -6  -4   1    0.20    0.16 
  -6  -4   1    0.01    0.23 
  -6  -4   1   -0.13    0.23 
   6  -4  -1    0.07    0.14 
   6  -4  -1    0.27    0.27 
  -6   4   1    0.32    0.26 
   6   4  -1    0.10    0.15 
  -6   4   1    0.05    0.17 
   6   4  -1    0.00    0.16 
   6   4  -1    0.01    0.16 
  -6   4   1    0.05    0.21 
   6   4  -1   -0.15    0.31 
  -5  -4   1   20.47    0.77 
   5  -4  -1   21.27    0.85 
  -5  -4   1   21.29    0.63 
  -5  -4   1   21.10    0.65 
   5  -4  -1   21.81    0.64 
  -5  -4   1   21.49    0.58 
  -5   4   1   21.43    0.57 
  -5   4   1   21.32    0.69 
  -5   4   1   21.07    0.80 
  -5   4   1   20.44    0.66 
   5   4  -1   20.53    0.69 
   5   4  -1   21.41    0.63 
   5   4  -1   21.34    0.63 
   5   4  -1   21.29    0.70 
  -4  -4   1    8.82    0.29 
  -4  -4   1    9.41    0.46 
   4  -4  -1    9.13    0.35 
   4  -4  -1    8.78    0.51 
  -4  -4   1    9.26    0.34 
  -4  -4   1    9.28    0.35 
  -4   4   1    9.19    0.34 
   4   4  -1    8.45    0.41 
   4   4  -1    9.13    0.33 
   4   4  -1    8.67    0.40 
  -4   4   1    8.85    0.39 
  -4   4   1    9.07    0.47 
   4   4  -1    8.75    0.34 
  -3  -4   1    4.30    0.21 
   3  -4  -1    4.04    0.21 
  -3  -4   1    3.67    0.30 
   3  -4  -1    3.91    0.29 
  -3  -4   1    3.93    0.21 
  -3  -4   1    3.66    0.16 
  -3   4   1    3.87    0.24 
   3   4  -1    4.17    0.27 
   3   4  -1    3.81    0.21 
   3   4  -1    4.14    0.28 
  -3   4   1    3.55    0.22 
  -3   4   1    3.57    0.30 
   3   4  -1    3.77    0.20 
  -2  -4   1    0.29    0.07 
   2  -4  -1    0.18    0.12 
  -2  -4   1    0.24    0.13 
   2  -4  -1    0.34    0.08 
  -2  -4   1    0.38    0.08 
   2   4  -1    0.29    0.11 
   2   4  -1    0.27    0.08 
  -2   4   1    0.38    0.09 
   2   4  -1    0.30    0.07 
  -2   4   1    0.33    0.15 
   2   4  -1    0.40    0.14 
  -2   4   1    0.22    0.09 
   1  -4  -1   22.18    0.70 
  -1  -4   1   20.65    0.57 
  -1  -4   1   22.35    0.69 
   1  -4  -1   21.82    0.58 
  -1  -4   1   20.82    0.53 
  -1   4   1   21.84    0.59 
   1   4  -1   22.19    0.58 
   1   4  -1   21.42    0.65 
  -1   4   1   20.70    0.68 
  -1   4   1   20.78    0.63 
   1   4  -1   20.82    0.53 
   0  -4   1   23.77    0.57 
   0  -4   1   22.76    0.62 
   0  -4  -1   23.20    0.72 
   0  -4  -1   22.89    0.57 
   0  -4  -1   23.70    0.62 
   0  -4   1   24.38    0.74 
   0   4  -1   23.02    0.62 
   0   4  -1   23.38    0.72 
   0   4   1   23.43    0.62 
   0   4  -1   23.92    0.69 
   0   4   1   23.92    0.73 
  -1  -4  -1   10.98    0.44 
  -1  -4  -1   11.45    0.35 
  -1  -4  -1   11.25    0.31 
   1  -4   1   11.60    0.35 
   1  -4   1   11.48    0.45 
   1   4   1   11.43    0.31 
  -1   4  -1   11.32    0.35 
   1   4   1   11.51    0.45 
  -1   4  -1   10.94    0.45 
   1   4   1   11.56    0.35 
  -1   4  -1   11.40    0.41 
  -2  -4  -1   11.50    0.35 
   2  -4   1   11.24    0.46 
  -2  -4  -1   10.92    0.45 
   2  -4   1   11.54    0.36 
  -2  -4  -1   10.95    0.33 
   2   4   1   11.44    0.35 
  -2   4  -1   11.13    0.41 
  -2   4  -1   10.76    0.46 
  -2   4  -1   10.99    0.36 
   2   4   1   11.66    0.45 
   2   4   1   11.47    0.32 
  -3  -4  -1   11.97    0.47 
   3  -4   1   11.34    0.37 
  -3  -4  -1   11.60    0.36 
  -3  -4  -1   10.96    0.34 
  -3  -4  -1   11.71    0.36 
  -3   4  -1   11.71    0.49 
   3   4   1   11.53    0.45 
  -3   4  -1   11.70    0.41 
  -3   4  -1   11.37    0.39 
   3   4   1   11.25    0.35 
   3   4   1   11.65    0.37 
  -4  -4  -1    3.91    0.26 
   4  -4   1    3.80    0.22 
  -4  -4  -1    4.17    0.21 
   4  -4   1    3.64    0.35 
  -4  -4  -1    3.91    0.21 
  -4  -4  -1    4.46    0.33 
  -4   4  -1    4.14    0.24 
   4   4   1    4.25    0.24 
  -4   4  -1    4.19    0.26 
   4   4   1    4.00    0.28 
  -4   4  -1    4.16    0.25 
   4   4   1    3.89    0.22 
  -4   4  -1    3.67    0.36 
   5  -4   1    0.52    0.12 
  -5  -4  -1    1.11    0.23 
  -5  -4  -1    0.97    0.14 
  -5  -4  -1    0.78    0.13 
   5  -4   1    0.95    0.24 
  -5  -4  -1    0.58    0.17 
   5   4   1    0.61    0.16 
   5   4   1    0.71    0.16 
  -5   4  -1    0.70    0.17 
   5   4   1    0.69    0.13 
  -5   4  -1    1.01    0.19 
  -5   4  -1    0.94    0.24 
  -5   4  -1    0.91    0.13 
   6  -4   1    0.02    0.12 
  -6  -4  -1    0.03    0.24 
  -6  -4  -1    0.08    0.22 
  -6  -4  -1   -0.06    0.14 
  -6  -4  -1   -0.16    0.15 
   6  -4   1   -0.15    0.25 
   6   4   1   -0.07    0.19 
   6   4   1    0.08    0.14 
  -6   4  -1    0.16    0.20 
  -6   4  -1    0.20    0.30 
  -6   4  -1    0.18    0.16 
   6   4   1    0.00    0.15 
   7  -4   1    0.22    0.16 
  -7  -4  -1    0.34    0.19 
   7  -4   1    0.57    0.29 
  -7   4  -1   -0.39    0.24 
   7   4   1    0.58    0.19 
   7   4   1    0.72    0.22 
   7   4   1    0.49    0.19 
   7   4   1    0.68    0.28 
   8  -4   1   -0.03    0.20 
  -8  -4  -1    0.74    0.35 
   8  -4   1   -0.26    0.32 
   8  -4   1    0.10    0.45 
  -8   4  -1   -0.07    0.35 
   8   4   1    0.60    0.25 
  -8   4  -1    0.07    0.43 
  -8   4  -1   -0.14    0.29 
   8   4   1   -0.01    0.39 
   8   4   1    0.21    0.25 
   8   4   1    0.30    0.21 
   8   4   1    0.16    0.24 
  -8  -5   1    0.41    0.44 
   8  -5  -1    1.54    0.52 
   8  -5  -1    1.78    0.46 
   8  -5  -1    1.34    0.28 
   8   5  -1    1.79    0.32 
  -8   5   1    2.05    0.57 
   8   5  -1    1.52    0.41 
  -8   5   1   -0.10    0.43 
  -8   5   1    1.44    0.32 
   8   5  -1    1.57    0.33 
   8   5  -1    1.36    0.31 
  -7  -5   1    5.48    0.47 
  -7  -5   1    4.93    0.34 
   7  -5  -1    4.68    0.38 
   7   5  -1    3.97    0.43 
  -7   5   1    3.72    0.40 
   7   5  -1    4.83    0.38 
  -7   5   1    4.57    0.54 
   7   5  -1    4.75    0.48 
   7   5  -1    4.51    0.41 
   6  -5  -1    0.61    0.18 
   6  -5  -1    0.76    0.35 
  -6  -5   1    0.94    0.31 
  -6  -5   1    1.12    0.20 
   6   5  -1    0.73    0.23 
  -6   5   1    0.89    0.35 
   6   5  -1    1.28    0.25 
   6   5  -1    1.21    0.24 
  -6   5   1    0.89    0.20 
   6   5  -1    0.95    0.22 
  -6   5   1    0.61    0.27 
   5  -5  -1    9.76    0.67 
  -5  -5   1   11.38    0.61 
   5  -5  -1   10.56    0.43 
  -5  -5   1   10.44    0.42 
  -5  -5   1   10.77    0.47 
  -5  -5   1   10.97    0.36 
   5   5  -1   10.63    0.41 
  -5   5   1   11.41    0.62 
  -5   5   1   11.03    0.41 
   5   5  -1   10.25    0.52 
   5   5  -1   11.00    0.43 
   5   5  -1   11.33    0.53 
  -5   5   1   11.16    0.50 
   4  -5  -1    1.52    0.25 
   4  -5  -1    1.22    0.16 
  -4  -5   1    1.23    0.25 
  -4  -5   1    1.55    0.19 
  -4  -5   1    1.40    0.16 
  -4  -5   1    1.36    0.13 
   4   5  -1    1.39    0.23 
  -4   5   1    1.17    0.18 
  -4   5   1    1.26    0.27 
   4   5  -1    0.99    0.15 
   4   5  -1    1.43    0.22 
  -4   5   1    1.25    0.16 
   4   5  -1    1.27    0.17 
   3  -5  -1    7.29    0.42 
  -3  -5   1    7.57    0.45 
   3  -5  -1    7.22    0.31 
  -3  -5   1    7.29    0.30 
  -3  -5   1    7.94    0.26 
  -3  -5   1    7.68    0.31 
   3   5  -1    7.66    0.42 
   3   5  -1    7.79    0.40 
  -3   5   1    7.57    0.46 
   3   5  -1    7.55    0.31 
  -3   5   1    7.26    0.35 
   3   5  -1    7.39    0.27 
  -3   5   1    7.44    0.34 
   2  -5  -1   13.20    0.43 
  -2  -5   1   13.04    0.39 
  -2  -5   1   13.04    0.43 
  -2  -5   1   15.05    0.58 
   2  -5  -1   13.31    0.56 
   2   5  -1   13.65    0.55 
  -2   5   1   12.79    0.48 
  -2   5   1   13.08    0.44 
   2   5  -1   13.85    0.38 
   2   5  -1   13.32    0.52 
   2   5  -1   13.81    0.43 
  -2   5   1   13.30    0.58 
  -1  -5   1   44.52    1.27 
  -1  -5   1   45.81    1.13 
  -1  -5   1   45.91    1.07 
   1  -5  -1   46.20    1.13 
   1  -5  -1   45.54    1.28 
  -1   5   1   45.39    1.28 
   1   5  -1   45.61    1.07 
   1   5  -1   44.90    1.26 
  -1   5   1   44.96    1.13 
   1   5  -1   42.21    1.22 
  -1   5   1   44.19    1.21 
   1   5  -1   45.22    1.13 
   0  -5  -1   78.06    1.76 
   0  -5  -1   74.19    1.82 
   0  -5  -1   76.60    1.97 
   0  -5   1   76.33    1.83 
   0  -5   1   76.01    1.97 
   0  -5   1   76.01    1.76 
   0   5   1   76.60    1.97 
   0   5  -1   78.32    1.92 
   0   5   1   79.42    1.83 
   0   5  -1   74.91    1.82 
   0   5  -1   74.62    1.96 
  -1  -5  -1   13.54    0.38 
  -1  -5  -1   13.57    0.55 
   1  -5   1   14.39    0.44 
   1  -5   1   14.10    0.56 
  -1  -5  -1   13.85    0.43 
   1   5   1   13.65    0.37 
   1   5   1   13.58    0.54 
   1   5   1   14.75    0.44 
  -1   5  -1   14.35    0.44 
  -1   5  -1   13.41    0.56 
  -1   5  -1   14.14    0.51 
  -2  -5  -1   39.21    1.12 
   2  -5   1   36.89    0.98 
  -2  -5  -1   37.85    0.97 
  -2  -5  -1   38.10    0.93 
   2  -5   1   37.92    1.14 
  -2   5  -1   40.63    1.00 
   2   5   1   38.79    1.11 
  -2   5  -1   38.52    1.14 
  -2   5  -1   38.36    1.05 
   2   5   1   37.27    0.97 
   2   5   1   38.33    0.92 
   3  -5   1    3.32    0.31 
  -3  -5  -1    3.50    0.22 
  -3  -5  -1    3.84    0.21 
   3  -5   1    3.63    0.22 
  -3  -5  -1    4.00    0.34 
  -3  -5  -1    3.74    0.19 
   3   5   1    3.29    0.20 
  -3   5  -1    3.34    0.25 
  -3   5  -1    3.33    0.25 
   3   5   1    3.56    0.21 
  -3   5  -1    3.91    0.36 
   3   5   1    3.15    0.31 
  -4  -5  -1    1.07    0.17 
  -4  -5  -1    0.85    0.13 
   4  -5   1    0.89    0.14 
  -4  -5  -1    0.85    0.23 
   4  -5   1    1.09    0.22 
  -4  -5  -1    0.88    0.13 
  -4   5  -1    0.99    0.18 
   4   5   1    0.96    0.15 
  -4   5  -1    0.68    0.23 
  -4   5  -1    1.01    0.16 
   4   5   1    1.05    0.21 
   4   5   1    0.96    0.14 
   5  -5   1    0.16    0.24 
  -5  -5  -1    0.08    0.18 
  -5  -5  -1   -0.19    0.11 
  -5  -5  -1    0.14    0.22 
   5  -5   1   -0.08    0.11 
  -5   5  -1    0.04    0.17 
   5   5   1    0.07    0.16 
   5   5   1    0.35    0.14 
   5   5   1    0.16    0.18 
  -5   5  -1   -0.02    0.23 
   5   5   1   -0.04    0.16 
  -5   5  -1    0.06    0.16 
  -5   5  -1    0.02    0.12 
  -6  -5  -1    2.64    0.23 
   6  -5   1    3.14    0.28 
   6  -5   1    3.64    0.44 
  -6   5  -1    3.36    0.41 
  -6   5  -1    2.88    0.30 
   6   5   1    3.40    0.35 
   6   5   1    2.88    0.28 
   6   5   1    2.89    0.27 
  -6   5  -1    1.87    0.28 
   6   5   1    3.36    0.30 
  -7  -5  -1    4.64    0.42 
   7  -5   1    5.11    0.38 
  -7  -5  -1    5.30    0.38 
   7   5   1    5.31    0.42 
   7   5   1    5.61    0.54 
   7   5   1    5.41    0.40 
  -7   5  -1    5.00    0.45 
  -7   5  -1    5.72    0.54 
   7   5   1    5.26    0.38 
   8  -5   1    0.56    0.26 
  -8  -5  -1    0.68    0.39 
   8  -5   1    0.19    0.49 
  -8  -5  -1   -0.19    0.40 
   8  -5   1    0.55    0.41 
  -8   5  -1    0.34    0.28 
   8   5   1    0.48    0.42 
   8   5   1    0.25    0.33 
   8   5   1    0.38    0.40 
   8   5   1    0.56    0.26 
  -8   5  -1   -0.50    0.49 
  -8   5  -1   -0.21    0.41 
  -8  -6   1   -0.23    0.50 
  -8  -6   1    1.60    0.42 
   8  -6  -1    2.09    0.57 
   8  -6  -1    2.04    0.36 
   8   6  -1    1.97    0.35 
  -8   6   1    2.53    0.66 
   8   6  -1    2.14    0.39 
   8   6  -1    1.68    0.46 
   8   6  -1    2.18    0.41 
  -8   6   1    0.49    0.50 
  -8   6   1    1.51    0.37 
  -7  -6   1    5.05    0.50 
   7  -6  -1    3.65    0.59 
  -7  -6   1    5.02    0.37 
  -7  -6   1    5.39    0.48 
   7  -6  -1    4.00    0.42 
   7   6  -1    4.91    0.46 
   7   6  -1    4.60    0.44 
   7   6  -1    4.39    0.41 
  -7   6   1    4.20    0.43 
   7   6  -1    4.23    0.46 
  -7   6   1    5.63    0.64 
  -6  -6   1    0.21    0.28 
  -6  -6   1   -0.41    0.30 
  -6  -6   1    0.12    0.16 
   6  -6  -1    0.11    0.19 
   6  -6  -1    0.51    0.39 
   6   6  -1    0.37    0.24 
   6   6  -1    0.26    0.24 
  -6   6   1    0.35    0.40 
  -6   6   1    0.11    0.19 
  -6   6   1    0.09    0.14 
   6   6  -1    0.07    0.20 
   6   6  -1    0.25    0.25 
  -6   6   1    0.04    0.27 
  -5  -6   1    0.44    0.21 
  -5  -6   1    0.38    0.28 
   5  -6  -1    0.26    0.16 
  -5  -6   1    0.70    0.17 
  -5  -6   1    0.38    0.14 
   5   6  -1    0.44    0.17 
   5   6  -1    0.30    0.18 
   5   6  -1    0.22    0.21 
  -5   6   1    0.55    0.24 
  -5   6   1    0.40    0.17 
   5   6  -1    0.62    0.23 
  -5   6   1    0.39    0.32 
   4  -6  -1    9.60    0.56 
   4  -6  -1    9.23    0.40 
  -4  -6   1   10.56    0.60 
  -4  -6   1    9.66    0.41 
  -4  -6   1    9.77    0.41 
  -4  -6   1    9.50    0.34 
   4   6  -1    9.47    0.52 
  -4   6   1    8.89    0.45 
  -4   6   1    9.37    0.61 
   4   6  -1    9.38    0.36 
   4   6  -1    9.24    0.41 
   4   6  -1    9.75    0.53 
  -4   6   1    9.60    0.45 
  -3  -6   1    9.96    0.38 
  -3  -6   1   10.15    0.37 
  -3  -6   1   10.08    0.56 
   3  -6  -1    9.02    0.51 
   3  -6  -1   10.08    0.40 
   3   6  -1    9.69    0.53 
  -3   6   1   10.51    0.58 
   3   6  -1   10.03    0.39 
  -3   6   1    9.92    0.43 
  -3   6   1   10.17    0.45 
   3   6  -1   10.00    0.34 
   3   6  -1    9.77    0.49 
  -2  -6   1   26.28    0.69 
  -2  -6   1   27.12    0.75 
   2  -6  -1   27.76    0.92 
  -2  -6   1   27.62    0.94 
   2  -6  -1   26.37    0.75 
   2   6  -1   27.26    0.75 
  -2   6   1   26.65    0.84 
   2   6  -1   26.83    0.90 
  -2   6   1   26.34    0.77 
   2   6  -1   26.52    0.68 
  -2   6   1   25.78    0.93 
   2   6  -1   26.35    0.86 
   1  -6  -1    9.42    0.35 
   1  -6  -1    9.09    0.48 
  -1  -6   1    8.71    0.29 
  -1  -6   1    8.28    0.49 
  -1  -6   1    8.59    0.34 
   1   6  -1    8.49    0.42 
   1   6  -1    9.13    0.49 
  -1   6   1    9.72    0.52 
  -1   6   1    8.76    0.35 
   1   6  -1    9.09    0.29 
   1   6  -1    8.85    0.35 
  -1   6   1    7.96    0.40 
   0  -6   1    2.09    0.19 
   0  -6  -1    2.11    0.14 
   0  -6  -1    2.26    0.28 
   0  -6   1    2.06    0.13 
   0  -6  -1    1.86    0.17 
   0  -6   1    2.33    0.29 
   0   6  -1    2.26    0.24 
   0   6   1    1.99    0.23 
   0   6  -1    2.27    0.30 
   0   6   1    2.16    0.19 
   0   6  -1    2.31    0.20 
   0   6   1    2.04    0.27 
   1  -6   1    8.10    0.33 
  -1  -6  -1    8.42    0.28 
  -1  -6  -1    8.01    0.46 
   1  -6   1    8.34    0.47 
  -1  -6  -1    8.07    0.32 
   1  -6   1    8.53    0.27 
  -1   6  -1    7.93    0.40 
   1   6   1    9.12    0.49 
  -1   6  -1    8.50    0.35 
   1   6   1    8.53    0.27 
  -1   6  -1    8.35    0.47 
   1   6   1    8.25    0.33 
  -2  -6  -1   25.60    0.67 
  -2  -6  -1   25.80    0.88 
  -2  -6  -1   25.10    0.72 
   2  -6   1   25.11    0.72 
   2  -6   1   25.71    0.90 
   2   6   1   26.30    0.88 
  -2   6  -1   25.41    0.74 
   2   6   1   25.44    0.72 
  -2   6  -1   25.16    0.81 
  -2   6  -1   25.11    0.90 
   2   6   1   25.16    0.65 
  -3  -6  -1    0.35    0.21 
   3  -6   1    0.67    0.14 
   3  -6   1    0.79    0.22 
  -3  -6  -1    0.68    0.13 
  -3  -6  -1    0.72    0.14 
  -3   6  -1    0.46    0.15 
   3   6   1    0.82    0.22 
  -3   6  -1    1.18    0.26 
   3   6   1    0.75    0.13 
   3   6   1    0.63    0.14 
  -3   6  -1    0.59    0.16 
  -4  -6  -1    0.56    0.17 
  -4  -6  -1    0.71    0.23 
  -4  -6  -1    0.44    0.14 
   4  -6   1    0.28    0.21 
   4  -6   1    0.62    0.16 
  -4  -6  -1    0.64    0.13 
   4   6   1    0.44    0.22 
   4   6   1    0.53    0.15 
   4   6   1    1.27    0.26 
   4   6   1    0.51    0.14 
  -4   6  -1    0.66    0.18 
  -4   6  -1    0.67    0.18 
  -4   6  -1    0.53    0.27 
  -5  -6  -1    8.70    0.38 
   5  -6   1    9.34    0.42 
  -5  -6  -1    8.90    0.47 
  -5  -6  -1    9.29    0.60 
  -5   6  -1    9.46    0.49 
   5   6   1    9.07    0.41 
  -5   6  -1   10.22    0.45 
   5   6   1    8.78    0.40 
   5   6   1    9.70    0.57 
  -5   6  -1    7.86    0.63 
   5   6   1    8.36    0.51 
  -6  -6  -1    8.80    0.43 
   6  -6   1   10.18    0.80 
   6  -6   1    9.31    0.46 
  -6  -6  -1    9.09    0.42 
   6   6   1    8.64    0.48 
  -6   6  -1    8.43    0.48 
   6   6   1    9.08    0.54 
   6   6   1    9.06    0.44 
   6   6   1   10.00    0.62 
  -7  -6  -1    4.78    0.46 
  -7  -6  -1    3.64    0.30 
   7  -6   1    4.52    0.43 
  -7  -6  -1    4.00    0.46 
   7  -6   1    4.62    0.61 
   7   6   1    3.98    0.38 
   7   6   1    3.48    0.38 
   7   6   1    4.97    0.49 
   7   6   1    4.07    0.43 
  -7   6  -1    3.10    0.36 
  -7   6  -1    3.52    0.55 
   8  -6   1    1.55    0.33 
   8  -6   1    2.38    0.54 
  -8  -6  -1    1.26    0.29 
   8   6   1    1.86    0.33 
   8   6   1    1.87    0.33 
   8   6   1    1.86    0.46 
  -8   6  -1    0.60    0.63 
   8   6   1    1.22    0.44 
  -8   6  -1   -0.16    0.47 
  -8   6  -1    1.64    0.35 
  -8  -7   1   -0.07    0.27 
  -8  -7   1    0.52    0.45 
   8  -7  -1    0.70    0.38 
   8   7  -1   -0.03    0.46 
   8   7  -1    0.41    0.37 
  -8   7   1    0.36    0.31 
  -8   7   1   -0.73    0.63 
   8   7  -1    0.26    0.50 
  -8   7   1   -0.99    0.80 
  -7  -7   1    3.46    0.38 
   7  -7  -1    3.77    0.39 
  -7  -7   1    3.16    0.48 
   7  -7  -1    2.98    0.70 
   7   7  -1    4.03    0.47 
   7   7  -1    4.15    0.50 
   7   7  -1    3.67    0.41 
   7   7  -1    4.01    0.38 
  -7   7   1    3.58    0.42 
  -7   7   1    4.83    0.72 
   6  -7  -1    7.26    0.47 
  -6  -7   1    7.99    0.59 
  -6  -7   1    7.11    0.39 
  -6  -7   1    7.20    0.46 
   6  -7  -1   10.01    0.91 
   6   7  -1    6.72    0.47 
   6   7  -1    7.26    0.60 
  -6   7   1    6.99    0.62 
   6   7  -1    6.77    0.48 
   6   7  -1    6.82    0.71 
  -6   7   1    7.62    0.80 
  -5  -7   1    4.88    0.52 
   5  -7  -1    3.96    0.36 
  -5  -7   1    3.75    0.30 
   5  -7  -1    3.90    0.54 
   5   7  -1    4.19    0.30 
  -5   7   1    4.18    0.45 
   5   7  -1    4.14    0.43 
   5   7  -1    3.89    0.36 
   5   7  -1    3.79    0.40 
  -5   7   1    3.94    0.39 
  -4  -7   1   13.69    0.76 
  -4  -7   1   14.08    0.53 
   4  -7  -1   12.28    0.71 
   4  -7  -1   14.32    0.53 
  -4  -7   1   11.35    0.56 
  -4  -7   1   12.88    0.44 
   4   7  -1   13.61    0.52 
  -4   7   1   15.01    0.87 
   4   7  -1   15.04    0.68 
  -4   7   1   13.88    0.59 
  -4   7   1   14.03    0.60 
   4   7  -1   13.50    0.47 
   4   7  -1   13.80    0.71 
   3  -7  -1    5.24    0.33 
  -3  -7   1    5.14    0.51 
  -3  -7   1    5.14    0.31 
  -3  -7   1    5.51    0.31 
   3  -7  -1    5.14    0.49 
   3   7  -1    5.84    0.46 
  -3   7   1    5.54    0.37 
   3   7  -1    5.39    0.27 
  -3   7   1    5.98    0.40 
  -3   7   1    5.10    0.52 
   3   7  -1    5.42    0.32 
   3   7  -1    4.85    0.48 
   2  -7  -1    0.74    0.15 
  -2  -7   1    0.85    0.26 
  -2  -7   1    1.10    0.17 
  -2  -7   1    0.95    0.15 
   2  -7  -1    0.75    0.23 
  -2   7   1    1.03    0.30 
   2   7  -1    0.93    0.23 
   2   7  -1    1.04    0.17 
   2   7  -1    0.90    0.26 
  -2   7   1    0.93    0.18 
  -2   7   1    1.17    0.21 
   2   7  -1    1.17    0.14 
  -1  -7   1    1.14    0.25 
   1  -7  -1    1.24    0.16 
  -1  -7   1    1.08    0.13 
  -1  -7   1    1.13    0.16 
   1  -7  -1    1.02    0.12 
   1  -7  -1    0.97    0.25 
   1   7  -1    0.77    0.15 
  -1   7   1    1.05    0.17 
  -1   7   1    0.80    0.26 
   1   7  -1    0.74    0.20 
  -1   7   1    1.38    0.23 
   1   7  -1    1.02    0.24 
   0  -7  -1    4.07    0.20 
   0  -7  -1    4.53    0.41 
   0  -7   1    4.18    0.21 
   0  -7   1    4.00    0.41 
   0  -7  -1    3.89    0.25 
   0  -7   1    4.22    0.26 
   0   7   1    4.44    0.36 
   0   7  -1    4.14    0.28 
   0   7   1    4.34    0.27 
   0   7   1    4.28    0.44 
   0   7  -1    4.07    0.42 
   0   7  -1    4.07    0.34 
   1  -7   1    0.42    0.14 
  -1  -7  -1    0.37    0.23 
   1  -7   1    0.49    0.10 
  -1  -7  -1    0.58    0.12 
  -1  -7  -1    0.48    0.12 
   1  -7   1    0.80    0.23 
   1   7   1    0.36    0.13 
  -1   7  -1    0.23    0.23 
  -1   7  -1    0.57    0.19 
   1   7   1    0.81    0.20 
  -1   7  -1    0.53    0.16 
   1   7   1    0.33    0.22 
  -2  -7  -1    5.78    0.48 
  -2  -7  -1    5.48    0.27 
   2  -7   1    5.18    0.47 
   2  -7   1    5.31    0.30 
  -2  -7  -1    5.74    0.30 
  -2   7  -1    6.37    0.51 
   2   7   1    5.13    0.24 
  -2   7  -1    4.94    0.38 
   2   7   1    5.89    0.49 
  -2   7  -1    5.63    0.33 
   2   7   1    5.28    0.41 
   2   7   1    5.50    0.31 
   3  -7   1    4.96    0.47 
  -3  -7  -1    5.45    0.30 
  -3  -7  -1    5.63    0.51 
  -3  -7  -1    5.46    0.31 
   3  -7   1    6.05    0.34 
   3   7   1    5.83    0.33 
   3   7   1    6.16    0.28 
   3   7   1    5.35    0.49 
  -3   7  -1    5.83    0.37 
  -3   7  -1    6.07    0.41 
  -3   7  -1    5.40    0.54 
   3   7   1    6.06    0.46 
  -4  -7  -1   41.44    1.06 
  -4  -7  -1   43.92    1.13 
  -4  -7  -1   38.11    1.19 
  -4  -7  -1   41.81    1.34 
   4  -7   1   41.06    1.14 
   4  -7   1   40.72    1.48 
   4   7   1   41.32    1.12 
  -4   7  -1   42.98    1.18 
  -4   7  -1   41.46    1.22 
  -4   7  -1   42.27    1.38 
   4   7   1   42.66    1.31 
   4   7   1   41.06    1.29 
   4   7   1   40.88    1.06 
  -5  -7  -1   12.49    0.46 
  -5  -7  -1    9.45    0.52 
   5  -7   1   12.65    0.52 
  -5  -7  -1    8.85    0.70 
   5  -7   1   10.58    0.75 
  -5  -7  -1   12.60    0.74 
   5   7   1   11.45    0.65 
  -5   7  -1   12.50    0.57 
   5   7   1   11.85    0.49 
  -5   7  -1   12.32    0.60 
   5   7   1   12.39    0.69 
   5   7   1   12.47    0.51 
  -6  -7  -1    4.38    0.39 
   6  -7   1    4.41    0.58 
   6  -7   1    4.51    0.42 
  -6  -7  -1    4.09    0.40 
  -6  -7  -1    4.73    0.37 
   6   7   1    4.17    0.34 
  -6   7  -1    3.63    0.38 
   6   7   1    4.28    0.42 
   6   7   1    5.25    0.52 
  -6   7  -1    4.00    0.55 
   6   7   1    4.90    0.45 
  -7  -7  -1    0.91    0.29 
  -7  -7  -1    1.83    0.48 
   7  -7   1    0.56    0.29 
  -7  -7  -1   -0.05    0.45 
  -7  -7  -1    1.03    0.27 
   7  -7   1    1.29    0.56 
   7   7   1    1.10    0.35 
   7   7   1    1.19    0.45 
   7   7   1    1.28    0.30 
  -7   7  -1    0.13    0.21 
  -7   7  -1    0.62    0.31 
  -7   7  -1   -0.73    0.55 
   7   7   1    0.92    0.36 
  -7   7  -1    0.06    0.39 
  -8  -7  -1   -0.16    0.42 
  -8  -7  -1   -0.32    0.29 
  -8   7  -1    0.65    0.34 
   8   7   1    1.04    0.53 
  -8   7  -1    1.09    0.75 
   8   7   1    0.73    0.50 
   8   7   1    0.44    0.34 
  -7  -8   1   -0.07    0.24 
   7  -8  -1    0.20    0.34 
  -7  -8   1    0.51    0.50 
  -7  -8   1   -0.55    0.56 
  -7  -8   1    0.94    0.35 
   7  -8  -1    1.05    0.64 
   7   8  -1    0.33    0.38 
  -7   8   1    0.54    0.33 
   7   8  -1    0.41    0.35 
   7   8  -1    0.04    0.48 
  -7   8   1    0.12    0.26 
  -7   8   1    0.34    0.50 
  -7   8   1   -0.67    0.62 
   7   8  -1   -0.39    0.41 
   6  -8  -1    1.39    0.30 
  -6  -8   1    1.15    0.23 
  -6  -8   1    1.57    0.39 
  -6  -8   1    0.82    0.28 
   6  -8  -1   -0.11    0.54 
  -6  -8   1   -0.12    0.48 
   6   8  -1    0.30    0.39 
   6   8  -1    1.08    0.31 
   6   8  -1    1.19    0.30 
  -6   8   1    0.67    0.52 
  -6   8   1    0.76    0.39 
   6   8  -1    0.57    0.41 
  -6   8   1    0.10    0.26 
   5  -8  -1    1.22    0.39 
  -5  -8   1    0.32    0.26 
   5  -8  -1    0.26    0.22 
  -5  -8   1    0.56    0.18 
  -5  -8   1    0.30    0.22 
  -5  -8   1    0.97    0.41 
   5   8  -1    0.35    0.23 
  -5   8   1   -0.40    0.41 
   5   8  -1    0.25    0.23 
  -5   8   1    0.11    0.26 
   5   8  -1    0.42    0.34 
  -5   8   1    0.11    0.28 
   5   8  -1    0.27    0.37 
  -4  -8   1    0.99    0.40 
   4  -8  -1   -0.02    0.28 
   4  -8  -1    0.65    0.22 
  -4  -8   1    0.78    0.36 
  -4  -8   1    0.39    0.16 
  -4   8   1    0.41    0.25 
  -4   8   1    0.76    0.26 
   4   8  -1    1.22    0.34 
   4   8  -1    0.83    0.20 
   4   8  -1    0.57    0.31 
   4   8  -1    0.51    0.21 
   3  -8  -1    2.12    0.43 
   3  -8  -1    2.34    0.26 
  -3  -8   1    2.91    0.37 
  -3  -8   1    2.18    0.24 
  -3  -8   1    2.86    0.42 
  -3   8   1    3.00    0.35 
   3   8  -1    2.22    0.53 
  -3   8   1    2.55    0.30 
   3   8  -1    3.04    0.26 
   3   8  -1    2.15    0.36 
   3   8  -1    2.24    0.30 
   2  -8  -1    2.88    0.27 
  -2  -8   1    2.86    0.27 
  -2  -8   1    2.89    0.43 
  -2  -8   1    2.64    0.21 
   2  -8  -1    3.17    0.40 
   2   8  -1    2.73    0.23 
   2   8  -1    2.73    0.33 
   2   8  -1    2.29    0.24 
  -2   8   1    2.19    0.40 
  -2   8   1    2.30    0.32 
  -2   8   1    2.34    0.26 
   2   8  -1    2.26    0.37 
   1  -8  -1    0.59    0.12 
  -1  -8   1    0.59    0.15 
   1  -8  -1    0.60    0.15 
   1  -8  -1    0.34    0.25 
  -1  -8   1    0.60    0.31 
  -1  -8   1    0.66    0.15 
   1   8  -1    1.04    0.30 
   1   8  -1    0.45    0.21 
  -1   8   1    0.44    0.30 
   1   8  -1    0.38    0.17 
  -1   8   1    0.40    0.20 
  -1   8   1    0.50    0.18 
   0  -8   1    0.04    0.11 
   0  -8  -1    0.03    0.11 
   0  -8   1    0.25    0.28 
   0  -8  -1   -0.64    0.23 
   0  -8   1   -0.01    0.13 
   0  -8  -1    0.02    0.12 
   0   8   1   -0.25    0.17 
   0   8  -1   -0.28    0.23 
   0   8  -1    0.01    0.19 
   0   8   1   -0.04    0.24 
   0   8   1   -0.05    0.14 
   0   8  -1    0.10    0.15 
   1  -8   1    3.62    0.23 
   1  -8   1    3.49    0.43 
  -1  -8  -1    3.77    0.43 
   1  -8   1    3.59    0.28 
  -1  -8  -1    3.30    0.24 
  -1  -8  -1    2.72    0.26 
  -1   8  -1    3.40    0.36 
   1   8   1    3.40    0.35 
  -1   8  -1    3.33    0.31 
  -1   8  -1    3.43    0.43 
   1   8   1    3.48    0.43 
   1   8   1    3.00    0.29 
   2  -8   1   56.70    1.49 
  -2  -8  -1   53.60    1.53 
   2  -8   1   59.14    1.75 
  -2  -8  -1   58.25    1.40 
  -2  -8  -1   57.32    1.73 
   2   8   1   57.97    1.67 
  -2   8  -1   56.99    1.75 
  -2   8  -1   56.68    1.61 
   2   8   1   57.85    1.38 
   2   8   1   56.42    1.71 
   2   8   1   57.95    1.48 
  -2   8  -1   56.33    1.50 
  -3  -8  -1   17.47    0.65 
  -3  -8  -1   17.93    0.61 
   3  -8   1   16.38    0.62 
  -3  -8  -1   17.63    0.86 
  -3   8  -1   18.00    0.75 
   3   8   1   16.78    0.69 
  -3   8  -1   18.61    0.68 
   3   8   1   18.11    0.83 
   3   8   1   17.22    0.53 
  -4  -8  -1    0.95    0.19 
  -4  -8  -1    0.69    0.22 
   4  -8   1    0.83    0.21 
  -4  -8  -1    1.10    0.37 
   4  -8   1    0.48    0.29 
   4   8   1    0.91    0.21 
  -4   8  -1    1.23    0.27 
  -4   8  -1    1.09    0.29 
   4   8   1    1.13    0.34 
   4   8   1    1.01    0.23 
   4   8   1    0.70    0.30 
  -5  -8  -1    3.97    0.35 
   5  -8   1    3.64    0.40 
  -5  -8  -1    4.38    0.35 
   5  -8   1    3.11    0.49 
  -5  -8  -1    3.86    0.39 
  -5   8  -1    4.46    0.44 
   5   8   1    4.21    0.40 
   5   8   1    4.57    0.33 
   5   8   1    4.88    0.48 
  -5   8  -1    4.40    0.50 
   5   8   1    4.19    0.49 
  -5   8  -1    4.38    0.60 
  -6  -8  -1    0.26    0.26 
  -6  -8  -1    0.36    0.23 
   6  -8   1    0.94    0.53 
  -6  -8  -1   -0.22    0.43 
  -6  -8  -1    0.53    0.37 
   6  -8   1    0.09    0.27 
  -6   8  -1    0.03    0.37 
   6   8   1    0.16    0.28 
  -6   8  -1    0.19    0.55 
   6   8   1   -0.18    0.35 
   6   8   1    0.07    0.25 
  -6   8  -1    0.24    0.26 
   6   8   1    0.78    0.41 
  -6   8  -1   -0.10    0.28 
  -7  -8  -1    0.10    0.50 
  -7  -8  -1    0.75    0.34 
  -7  -8  -1    0.39    0.29 
  -7  -8  -1    0.47    0.56 
   7  -8   1    0.41    0.33 
   7  -8   1    0.64    0.65 
   7   8   1    0.23    0.33 
   7   8   1    0.85    0.39 
  -7   8  -1    0.66    0.36 
   7   8   1    0.22    0.52 
  -7   8  -1    0.34    0.30 
  -7   8  -1    0.51    0.67 
   7   8   1    0.10    0.41 
  -7   8  -1   -0.30    0.47 
   7  -9  -1    0.51    0.81 
  -7  -9   1   -0.02    0.29 
  -7  -9   1   -0.09    0.48 
   7   9  -1   -0.09    0.44 
   7   9  -1    0.38    0.61 
  -7   9   1   -0.75    0.57 
   7   9  -1    0.18    0.56 
  -7   9   1   -0.16    0.33 
   7   9  -1   -0.01    0.40 
   6  -9  -1    0.38    0.40 
   6  -9  -1    0.86    0.61 
  -6  -9   1    1.22    0.35 
  -6  -9   1    0.67    0.42 
  -6  -9   1    0.96    0.25 
  -6  -9   1   -0.16    0.57 
  -6   9   1    1.58    0.65 
   6   9  -1    1.53    0.52 
  -6   9   1    0.36    0.35 
   6   9  -1    1.13    0.36 
  -6   9   1    0.37    0.45 
   6   9  -1    0.10    0.49 
   6   9  -1    0.45    0.34 
  -5  -9   1    0.28    0.20 
  -5  -9   1    0.61    0.27 
   5  -9  -1    1.13    0.47 
  -5  -9   1    0.66    0.34 
   5  -9  -1    0.33    0.28 
  -5  -9   1    0.26    0.50 
  -5   9   1    0.78    0.35 
  -5   9   1    0.53    0.34 
   5   9  -1    0.41    0.46 
   5   9  -1    0.34    0.25 
   5   9  -1    0.26    0.27 
   5   9  -1    0.78    0.39 
  -5   9   1    0.19    0.50 
   4  -9  -1   -0.46    0.33 
  -4  -9   1   -0.29    0.41 
  -4  -9   1   -0.01    0.20 
  -4  -9   1    0.08    0.18 
  -4  -9   1    0.16    0.24 
   4  -9  -1   -0.20    0.22 
   4   9  -1   -0.68    0.33 
   4   9  -1   -0.19    0.22 
  -4   9   1    0.24    0.30 
   4   9  -1   -0.05    0.19 
   4   9  -1    0.52    0.32 
  -4   9   1    0.19    0.28 
  -3  -9   1    0.92    0.40 
   3  -9  -1    1.12    0.25 
   3  -9  -1    0.57    0.34 
   3   9  -1    0.83    0.37 
   3   9  -1    0.77    0.23 
  -3   9   1    1.00    0.37 
   3   9  -1    0.89    0.18 
   3   9  -1    0.88    0.28 
  -3   9   1    1.01    0.28 
  -2  -9   1    1.26    0.40 
   2  -9  -1    0.84    0.15 
  -2  -9   1    0.64    0.18 
   2  -9  -1    0.58    0.19 
   2  -9  -1    0.52    0.40 
  -2   9   1    1.12    0.40 
   2   9  -1    1.14    0.37 
   2   9  -1    0.87    0.22 
   2   9  -1    0.88    0.26 
  -2   9   1    0.54    0.23 
   1  -9  -1   17.23    0.52 
  -1  -9   1   16.76    0.62 
   1  -9  -1   17.67    0.69 
  -1  -9   1   17.37    0.55 
   1  -9  -1   17.74    0.89 
  -1  -9   1   16.84    0.88 
   1   9  -1   16.66    0.65 
  -1   9   1   16.34    0.65 
   1   9  -1   16.12    0.88 
  -1   9   1   16.33    0.78 
   0  -9  -1    0.17    0.28 
   0  -9  -1   -0.19    0.18 
   0  -9   1    0.25    0.30 
   0  -9   1   -0.04    0.14 
   0   9   1    0.08    0.19 
   0   9   1   -0.10    0.22 
   0   9  -1   -0.04    0.31 
   0   9  -1    0.12    0.24 
   0   9   1    0.12    0.29 
   0   9  -1    0.11    0.20 
   1  -9   1    9.58    0.47 
   1  -9   1    9.54    0.37 
  -1  -9  -1   10.81    0.70 
   1  -9   1    9.12    0.68 
  -1  -9  -1    8.83    0.44 
  -1   9  -1    9.18    0.70 
   1   9   1   10.07    0.71 
  -1   9  -1   10.61    0.62 
  -1   9  -1    9.97    0.50 
  -2  -9  -1   13.52    0.81 
   2  -9   1   14.11    0.58 
  -2  -9  -1   13.70    0.50 
   2  -9   1   13.76    0.80 
   2   9   1   14.69    0.84 
  -2   9  -1   14.57    0.62 
  -2   9  -1   11.96    0.79 
   2   9   1   14.76    0.72 
   2   9   1   13.78    0.57 
  -3  -9  -1    2.06    0.48 
  -3  -9  -1    1.04    0.27 
   3  -9   1    1.29    0.24 
   3  -9   1    0.77    0.35 
   3   9   1    1.80    0.44 
   3   9   1    1.53    0.34 
   3   9   1    1.51    0.25 
  -3   9  -1    1.69    0.30 
   3   9   1    1.31    0.20 
  -4  -9  -1    4.01    0.53 
  -4  -9  -1    4.06    0.30 
  -4  -9  -1    4.28    0.41 
  -4  -9  -1    2.23    0.31 
   4  -9   1    4.06    0.37 
   4  -9   1    3.43    0.46 
   4   9   1    3.91    0.47 
   4   9   1    4.08    0.53 
   4   9   1    3.80    0.28 
   4   9   1    4.27    0.41 
  -4   9  -1    4.10    0.58 
  -4   9  -1    3.89    0.41 
  -5  -9  -1   -0.03    0.22 
  -5  -9  -1    0.37    0.48 
  -5  -9  -1   -0.02    0.31 
   5  -9   1    0.33    0.40 
  -5  -9  -1    0.20    0.24 
   5  -9   1    0.27    0.25 
   5   9   1    0.06    0.39 
  -5   9  -1    0.15    0.35 
   5   9   1    0.31    0.27 
  -5   9  -1    0.34    0.39 
  -5   9  -1   -0.35    0.50 
   5   9   1   -0.55    0.37 
   5   9   1    0.19    0.25 
   6  -9   1   -0.12    0.30 
  -6  -9  -1    0.19    0.30 
   6  -9   1    0.23    0.66 
  -6  -9  -1    0.25    0.25 
  -6  -9  -1   -0.92    0.56 
  -6  -9  -1   -0.13    0.43 
   6   9   1    0.37    0.34 
  -6   9  -1    0.13    0.27 
   6   9   1    0.30    0.31 
  -6   9  -1    0.02    0.42 
   6   9   1   -0.55    0.40 
   6   9   1    0.22    0.50 
  -6   9  -1    0.47    0.63 
  -6   9  -1   -0.07    0.32 
   7  -9   1   -0.29    0.38 
  -7  -9  -1   -0.29    0.39 
  -7  -9  -1   -0.20    0.30 
   7  -9   1   -0.29    0.85 
  -7   9  -1    0.30    0.57 
  -7   9  -1    0.31    0.35 
   7   9   1    0.63    0.66 
   7   9   1    0.51    0.45 
   7   9   1    0.96    0.41 
  -6 -10   1    0.74    0.50 
  -6 -10   1    0.81    0.58 
   6 -10  -1    1.02    0.41 
  -6 -10   1   -0.15    0.72 
  -6 -10   1   -0.36    0.27 
   6 -10  -1    0.84    0.78 
   6  10  -1    0.82    0.63 
   6  10  -1    0.69    0.41 
  -6  10   1    0.56    0.44 
   6  10  -1    0.88    0.42 
   6  10  -1    1.94    0.66 
  -6  10   1    0.39    0.58 
  -5 -10   1   -0.27    0.30 
   5 -10  -1    0.60    0.57 
  -5 -10   1    0.31    0.38 
  -5 -10   1    0.05    0.56 
   5 -10  -1   -0.18    0.31 
  -5 -10   1    0.01    0.23 
  -5  10   1    0.70    0.66 
  -5  10   1    0.16    0.43 
  -5  10   1   -0.06    0.45 
   5  10  -1    0.24    0.51 
   5  10  -1    0.12    0.34 
   5  10  -1    0.90    0.52 
   5  10  -1    0.34    0.29 
  -4 -10   1    0.03    0.20 
   4 -10  -1    0.04    0.26 
  -4 -10   1    0.38    0.27 
  -4 -10   1    0.16    0.30 
  -4 -10   1    0.18    0.53 
   4 -10  -1   -0.11    0.41 
   4  10  -1    0.23    0.27 
  -4  10   1    0.37    0.34 
  -4  10   1    1.20    0.57 
   4  10  -1    0.35    0.51 
   4  10  -1    1.07    0.44 
   4  10  -1    0.11    0.25 
   3 -10  -1   -0.05    0.38 
  -3 -10   1    0.14    0.21 
   3 -10  -1    0.05    0.23 
  -3 -10   1   -0.74    0.47 
  -3 -10   1   -0.06    0.25 
  -3  10   1   -0.26    0.28 
  -3  10   1   -0.40    0.42 
   3  10  -1    0.14    0.19 
   3  10  -1   -0.29    0.32 
   3  10  -1   -0.82    0.39 
   3  10  -1   -0.28    0.24 
  -2 -10   1    3.41    0.56 
   2 -10  -1    2.92    0.26 
  -2 -10   1    1.99    0.27 
   2 -10  -1    2.19    0.50 
   2 -10  -1    3.13    0.34 
  -2  10   1    3.39    0.40 
   2  10  -1    3.16    0.42 
  -2  10   1    3.06    0.53 
   2  10  -1    3.13    0.35 
  -1 -10   1    1.89    0.47 
  -1 -10   1    1.94    0.28 
   1 -10  -1    1.23    0.42 
   1 -10  -1    2.40    0.30 
   1  10  -1    2.27    0.50 
  -1  10   1    1.88    0.45 
  -1  10   1    2.09    0.33 
   1  10  -1    1.75    0.28 
   0 -10  -1   10.27    0.51 
   0 -10   1    9.21    0.51 
   0 -10   1    9.32    0.81 
   0 -10  -1   10.35    0.97 
   0  10   1   10.16    0.80 
   0  10   1   10.10    0.56 
   0  10  -1   10.37    0.55 
   0  10  -1    9.88    0.79 
   1 -10   1    1.20    0.37 
  -1 -10  -1    0.22    0.38 
  -1 -10  -1    0.65    0.21 
   1 -10   1    0.77    0.24 
  -1  10  -1    0.25    0.38 
   1  10   1    0.36    0.25 
  -1  10  -1    0.74    0.27 
   2 -10   1    2.56    0.24 
   2 -10   1    2.58    0.48 
   2 -10   1    1.95    0.31 
  -2 -10  -1    2.78    0.49 
   2  10   1    2.49    0.33 
  -2  10  -1    2.01    0.49 
   2  10   1    3.40    0.55 
   2  10   1    2.70    0.43 
   3 -10   1    0.47    0.25 
   3 -10   1    0.11    0.19 
  -3 -10  -1    0.42    0.22 
   3 -10   1    0.25    0.38 
  -3 -10  -1    0.26    0.27 
  -3 -10  -1   -0.16    0.43 
   3  10   1    0.17    0.42 
  -3  10  -1   -0.24    0.40 
  -3  10  -1    0.47    0.33 
   3  10   1    0.47    0.25 
   3  10   1    0.86    0.39 
   3  10   1    0.16    0.19 
  -4 -10  -1    0.31    0.30 
   4 -10   1    0.40    0.30 
  -4 -10  -1    0.77    0.28 
  -4 -10  -1    0.38    0.22 
  -4 -10  -1    0.06    0.48 
   4 -10   1    0.94    0.45 
  -4  10  -1    0.05    0.38 
   4  10   1    0.54    0.43 
   4  10   1    0.20    0.27 
   4  10   1    0.55    0.45 
   4  10   1    0.23    0.24 
  -4  10  -1   -0.21    0.54 
   5 -10   1    0.13    0.47 
  -5 -10  -1   -0.10    0.25 
  -5 -10  -1    0.30    0.33 
  -5 -10  -1   -0.31    0.54 
   5 -10   1    0.02    0.32 
  -5 -10  -1    0.18    0.41 
   5  10   1   -0.06    0.32 
  -5  10  -1   -1.47    0.62 
   5  10   1    0.34    0.31 
   5  10   1    0.20    0.52 
  -5  10  -1    0.16    0.43 
   5  10   1   -0.75    0.49 
   6 -10   1    0.29    0.40 
  -6 -10  -1   -0.53    0.28 
  -6 -10  -1    0.19    0.51 
  -6 -10  -1   -0.09    0.66 
   6 -10   1   -1.31    0.75 
  -6 -10  -1   -0.01    0.41 
  -6  10  -1   -0.58    0.53 
  -6  10  -1    0.85    0.73 
   6  10   1    0.88    0.65 
   6  10   1   -0.22    0.38 
   6  10   1    0.41    0.58 
   6  10   1    0.08    0.40 
  -5 -11   1   -0.12    0.71 
   5 -11  -1    0.65    0.71 
  -5 -11   1    0.74    0.28 
   5 -11  -1   -0.60    0.38 
  -5 -11   1    0.25    0.50 
   5  11  -1    0.43    0.60 
   5  11  -1    0.65    0.66 
  -5  11   1    0.79    0.59 
  -5  11   1    0.42    0.51 
   5  11  -1    0.76    0.42 
   5  11  -1    0.42    0.36 
  -4 -11   1    0.47    0.34 
   4 -11  -1   -0.91    0.46 
  -4 -11   1    0.18    0.25 
  -4 -11   1   -0.24    0.40 
   4 -11  -1    0.01    0.34 
   4  11  -1    0.51    0.29 
   4  11  -1    1.08    0.54 
   4  11  -1   -0.19    0.60 
  -4  11   1   -0.77    0.61 
   4  11  -1    0.14    0.34 
  -4  11   1   -0.07    0.43 
  -4  11   1   -0.18    0.44 
  -3 -11   1    2.03    0.38 
  -3 -11   1    1.71    0.34 
  -3 -11   1    1.59    0.62 
   3 -11  -1    1.43    0.26 
   3 -11  -1    2.14    0.38 
   3 -11  -1    0.98    0.47 
   3  11  -1    1.76    0.49 
  -3  11   1    1.63    0.41 
  -3  11   1    2.05    0.49 
   3  11  -1    0.45    0.53 
  -3  11   1    1.54    0.65 
   3  11  -1    1.98    0.37 
   2 -11  -1    1.65    0.26 
  -2 -11   1    1.56    0.53 
  -2 -11   1    1.66    0.29 
   2 -11  -1    1.34    0.50 
  -2 -11   1    1.32    0.29 
   2 -11  -1    1.13    0.31 
  -2  11   1    1.43    0.38 
   2  11  -1    1.04    0.45 
  -2  11   1    1.81    0.44 
  -2  11   1    1.20    0.57 
   2  11  -1    1.46    0.35 
   2  11  -1    0.95    0.55 
  -1 -11   1    3.54    0.32 
   1 -11  -1    4.50    0.63 
   1 -11  -1    3.55    0.30 
  -1 -11   1    4.22    0.62 
  -1 -11   1    3.53    0.37 
   1 -11  -1    3.70    0.38 
  -1  11   1    3.79    0.44 
   1  11  -1    4.17    0.56 
   1  11  -1    3.73    0.43 
   1  11  -1    4.14    0.68 
  -1  11   1    3.90    0.55 
  -1  11   1    2.84    0.59 
   0 -11   1    7.06    0.72 
   0 -11   1    5.75    0.49 
   0 -11  -1    7.52    0.45 
   0 -11  -1    6.45    0.51 
   0 -11   1    6.98    0.45 
   0 -11  -1    7.52    0.77 
   0  11  -1    7.00    0.69 
   0  11  -1    6.53    0.57 
   0  11   1    7.90    0.74 
   0  11   1    6.35    0.58 
   0  11   1    7.32    0.76 
   0  11  -1    8.98    0.90 
   1 -11   1   -0.13    0.22 
  -1 -11  -1    0.01    0.46 
   1 -11   1   -0.40    0.24 
  -1 -11  -1   -0.28    0.22 
   1 -11   1   -0.13    0.47 
  -1 -11  -1    0.13    0.24 
  -1  11  -1    0.37    0.32 
   1  11   1    0.00    0.47 
   1  11   1    0.23    0.36 
   1  11   1   -0.05    0.28 
  -1  11  -1   -0.44    0.35 
  -1  11  -1   -0.19    0.44 
   2 -11   1    0.27    0.28 
   2 -11   1    0.45    0.45 
  -2 -11  -1    0.40    0.27 
  -2 -11  -1   -0.03    0.25 
  -2 -11  -1    0.27    0.82 
   2 -11   1    0.41    0.24 
   2  11   1   -0.53    0.51 
   2  11   1    0.59    0.44 
  -2  11  -1    0.77    0.41 
   2  11   1   -0.02    0.28 
  -2  11  -1    0.08    0.54 
  -2  11  -1    0.90    0.35 
  -3 -11  -1   -0.03    0.32 
  -3 -11  -1    0.23    0.29 
   3 -11   1    0.30    0.47 
  -3 -11  -1    1.28    0.57 
   3 -11   1    0.44    0.23 
   3 -11   1   -0.15    0.34 
   3  11   1    0.70    0.55 
   3  11   1    0.67    0.33 
  -3  11  -1    0.78    0.44 
   3  11   1    0.48    0.46 
  -3  11  -1    0.34    0.39 
  -3  11  -1    0.65    0.58 
  -4 -11  -1   -0.12    0.25 
  -4 -11  -1    0.06    0.38 
   4 -11   1    0.40    0.38 
   4 -11   1    0.17    0.50 
  -4 -11  -1    1.45    0.66 
  -4 -11  -1    0.16    0.32 
   4  11   1    0.33    0.27 
  -4  11  -1   -0.70    0.55 
   4  11   1    0.29    0.56 
   4  11   1    0.37    0.34 
  -4  11  -1    0.23    0.46 
  -4  11  -1   -0.15    0.48 
   5 -11   1   -0.24    0.57 
  -5 -11  -1    0.33    0.30 
  -5 -11  -1    0.56    0.50 
   5 -11   1    1.11    0.42 
  -5 -11  -1    1.30    0.73 
  -5  11  -1    0.34    0.55 
   5  11   1    1.44    0.70 
   5  11   1    0.67    0.37 
  -5  11  -1    1.55    0.57 
   5  11   1    1.08    0.65 
   5  11   1    0.50    0.41 
  -4 -12   1    0.96    0.83 
   4 -12  -1    0.13    0.46 
  -4 -12   1   -0.27    0.28 
   4 -12  -1   -0.72    0.63 
   4  12  -1   -0.01    0.78 
   4  12  -1    0.08    0.42 
  -4  12   1    0.72    0.61 
  -4  12   1   -0.07    0.54 
  -3 -12   1    0.59    0.44 
   3 -12  -1    1.62    0.44 
   3 -12  -1    0.88    0.33 
   3 -12  -1   -0.59    0.55 
  -3 -12   1    1.48    0.74 
  -3 -12   1    0.88    0.39 
   3  12  -1    1.81    0.60 
   3  12  -1   -0.85    0.66 
   3  12  -1    0.93    0.41 
  -3  12   1    2.28    0.63 
  -3  12   1    1.00    0.50 
  -3  12   1   -0.31    0.68 
  -2 -12   1    4.50    0.44 
   2 -12  -1    4.24    0.49 
  -2 -12   1    4.29    0.43 
  -2 -12   1    5.77    0.82 
   2 -12  -1    4.83    0.40 
   2 -12  -1    4.12    0.69 
  -2  12   1    5.29    0.57 
   2  12  -1    4.70    0.53 
   2  12  -1    4.64    0.74 
  -2  12   1    4.31    0.65 
  -2  12   1    3.93    0.76 
   2  12  -1    4.70    0.60 
  -1 -12   1    1.58    0.34 
   1 -12  -1    1.25    0.31 
   1 -12  -1    1.73    0.38 
   1 -12  -1    1.43    0.65 
  -1 -12   1    1.66    0.39 
  -1 -12   1    1.08    0.64 
  -1  12   1    2.71    0.54 
   1  12  -1    1.81    0.41 
   1  12  -1    2.76    0.55 
  -1  12   1    1.59    0.72 
   1  12  -1    2.23    0.67 
  -1  12   1    1.96    0.45 
   0 -12  -1    0.82    0.36 
   0 -12   1    1.09    0.38 
   0 -12  -1    1.73    0.64 
   0 -12   1    0.45    0.31 
   0 -12   1    1.33    0.63 
   0 -12  -1    0.33    0.30 
   0  12   1    0.76    0.66 
   0  12  -1    1.12    0.48 
   0  12  -1    0.27    0.67 
   0  12   1    0.92    0.49 
   0  12   1    0.38    0.40 
   0  12  -1    1.11    0.41 
  -1 -12  -1    0.37    0.62 
   1 -12   1    0.09    0.29 
  -1 -12  -1    0.14    0.33 
   1 -12   1    0.59    0.58 
   1 -12   1    0.39    0.37 
  -1 -12  -1    0.17    0.31 
  -1  12  -1   -0.29    0.40 
   1  12   1   -0.23    0.34 
   1  12   1   -0.13    0.63 
  -1  12  -1    0.65    0.65 
   1  12   1   -0.06    0.48 
  -1  12  -1    0.66    0.52 
  -2 -12  -1    0.42    0.31 
   2 -12   1    0.05    0.35 
  -2 -12  -1   -0.59    0.34 
   2 -12   1   -0.23    0.27 
   2 -12   1    0.20    0.57 
  -2 -12  -1   -0.38    0.62 
   2  12   1    0.39    0.65 
  -2  12  -1    0.03    0.44 
  -2  12  -1   -0.37    0.48 
  -2  12  -1   -0.52    0.64 
   2  12   1   -0.29    0.35 
   2  12   1   -0.44    0.47 
   3 -12   1    4.91    0.74 
  -3 -12  -1    4.60    0.51 
  -3 -12  -1    3.58    0.84 
   3 -12   1    4.18    0.40 
  -3 -12  -1    3.74    0.48 
   3 -12   1    4.93    0.54 
   3  12   1    5.53    0.87 
  -3  12  -1    2.79    0.78 
   3  12   1    4.06    0.48 
  -3  12  -1    4.90    0.68 
   3  12   1    6.50    0.78 
  -3  12  -1    4.46    0.64 
   4 -12   1    1.48    0.71 
   4 -12   1   -0.14    0.45 
  -4 -12  -1   -1.44    0.73 
  -4 -12  -1   -0.11    0.29 
  -4 -12  -1    0.07    0.54 
  -4  12  -1   -0.43    0.62 
   4  12   1   -0.14    0.42 
  -4  12  -1    0.78    0.60 
   4  12   1    0.64    0.75 
   3 -13  -1    0.93    0.55 
   3  13  -1   -1.16    0.84 
  -3  13   1    0.54    0.65 
  -3  13   1    0.70    0.90 
  -2 -13   1    0.58    0.84 
   2 -13  -1   -0.33    0.70 
   2 -13  -1   -0.31    0.46 
   2  13  -1    0.66    0.83 
  -2  13   1    0.35    0.54 
  -2  13   1    1.44    0.83 
   2  13  -1    0.23    0.48 
   1 -13  -1    1.59    0.49 
   1 -13  -1    2.32    0.49 
   1 -13  -1    1.01    0.78 
  -1 -13   1    3.42    0.75 
  -1 -13   1    2.25    0.81 
  -1  13   1    1.74    0.90 
   1  13  -1    2.20    0.52 
  -1  13   1    2.36    0.56 
   1  13  -1    2.13    0.81 
  -1  13   1    3.19    1.04 
   0 -13  -1    1.34    0.79 
   0 -13   1    0.32    0.46 
   0 -13  -1    0.09    0.40 
   0 -13   1    0.46    0.43 
   0 -13  -1    0.11    0.40 
   0 -13   1   -0.74    0.71 
   0  13  -1    0.05    0.50 
   0  13   1   -0.33    0.49 
   0  13  -1    0.59    0.89 
   0  13   1    1.51    0.87 
   1 -13   1    3.55    0.83 
  -1 -13  -1    3.44    0.84 
  -1 -13  -1    2.80    0.49 
   1 -13   1    2.38    0.48 
   1  13   1    2.66    0.56 
  -1  13  -1    3.83    0.91 
   1  13   1    1.90    0.94 
  -1  13  -1    3.47    1.23 
  -1  13  -1    2.56    0.58 
   2 -13   1    0.48    0.48 
   2 -13   1   -1.02    0.74 
  -2 -13  -1    0.97    0.87 
   2  13   1    0.39    0.44 
   2  13   1   -1.21    0.88 
  -2  13  -1    0.24    0.58 
  -9   0   2    1.14    0.48 
   9   0  -2   -0.41    0.45 
  -9   0   2   -0.29    0.26 
  -9   0   2    0.17    0.45 
   9   0  -2    0.26    0.23 
   9   0  -2    0.39    0.31 
   8   0  -2    0.40    0.21 
   8   0  -2    0.57    0.34 
  -8   0   2    0.34    0.33 
   8   0  -2    0.39    0.24 
  -7   0   2   -0.11    0.22 
   7   0  -2    0.07    0.23 
   7   0  -2    0.09    0.14 
  -7   0   2   -0.07    0.14 
   7   0  -2   -0.07    0.18 
  -6   0   2    0.66    0.24 
   6   0  -2    0.52    0.16 
   6   0  -2    0.39    0.14 
   6   0  -2    0.53    0.20 
  -6   0   2    0.66    0.21 
  -6   0   2    0.59    0.15 
   6   0  -2    0.31    0.17 
   5   0  -2   -0.03    0.09 
  -5   0   2   -0.25    0.15 
   5   0  -2   -0.04    0.13 
   5   0  -2    0.09    0.12 
   5   0  -2    0.09    0.10 
  -5   0   2    0.06    0.11 
  -5   0   2   -0.04    0.13 
  -4   0   2   16.28    0.52 
  -4   0   2   15.83    0.48 
   4   0  -2   16.71    0.48 
   4   0  -2   15.99    0.48 
  -4   0   2   15.19    0.57 
   4   0  -2   16.33    0.49 
   4   0  -2   17.02    0.44 
   3   0  -2   -0.04    0.05 
   3   0  -2   -0.02    0.06 
  -3   0   2   -0.12    0.06 
   3   0  -2   -0.09    0.07 
   3   0  -2   -0.07    0.05 
  -3   0   2   -0.04    0.08 
  -3   0   2   -0.01    0.09 
  -2   0   2  942.05   21.54 
   2   0  -2  970.28   21.71 
   2   0  -2  977.16   21.91 
  -2   0   2  966.10   21.82 
   2   0  -2  959.59   21.52 
   2   0  -2  938.13   21.76 
  -2   0   2 1000.00   21.94 
   1   0  -2   -0.03    0.03 
   1   0  -2   -0.02    0.02 
  -1   0   2   -0.02    0.04 
   1   0  -2    0.03    0.03 
  -1   0   2   -0.04    0.03 
  -1   0   2    0.00    0.02 
   1   0  -2    0.04    0.03 
  -1   0   2   -0.02    0.02 
   0   0   2  147.23    3.32 
  -1   0  -2   -0.01    0.03 
   1   0   2   -0.04    0.04 
   1   0   2   -0.04    0.03 
   1   0   2   -0.04    0.03 
  -1   0  -2    0.01    0.03 
   2   0   2   26.03    0.60 
  -2   0  -2   25.09    0.62 
   2   0   2   27.13    0.63 
  -2   0  -2   25.67    0.61 
  -2   0  -2   25.76    0.60 
   2   0   2   25.60    0.63 
   2   0   2   26.08    0.60 
   2   0   2   25.58    0.63 
  -2   0  -2   26.32    0.65 
  -3   0  -2    0.03    0.06 
  -3   0  -2    0.01    0.07 
   3   0   2   -0.02    0.04 
  -3   0  -2   -0.04    0.04 
  -3   0  -2    0.09    0.05 
   3   0   2    0.01    0.07 
   3   0   2   -0.06    0.07 
   3   0   2   -0.04    0.03 
   3   0   2   -0.01    0.05 
  -4   0  -2   28.31    0.71 
   4   0   2   27.87    0.68 
   4   0   2   28.42    0.74 
   4   0   2   28.31    0.68 
  -4   0  -2   27.27    0.76 
  -4   0  -2   28.36    0.72 
   4   0   2   27.36    0.70 
   4   0   2   27.39    0.72 
   5   0   2    0.02    0.07 
   5   0   2    0.08    0.15 
   5   0   2   -0.07    0.08 
   5   0   2    0.06    0.07 
   5   0   2   -0.11    0.16 
  -5   0  -2   -0.08    0.09 
  -5   0  -2   -0.05    0.10 
  -5   0  -2    0.01    0.10 
   6   0   2   12.59    0.52 
  -6   0  -2   13.43    0.44 
   6   0   2   12.82    0.39 
   6   0   2   12.75    0.37 
  -6   0  -2   11.45    0.48 
   6   0   2   13.01    0.40 
  -6   0  -2   12.83    0.46 
   7   0   2    0.01    0.24 
   7   0   2    0.00    0.11 
   7   0   2    0.15    0.13 
  -7   0  -2   -0.30    0.15 
  -7   0  -2   -0.05    0.14 
  -7   0  -2   -0.02    0.17 
   8   0   2    6.05    0.33 
  -8   0  -2    6.25    0.48 
   8   0   2    5.93    0.47 
   8   0   2    6.32    0.32 
   9   0   2   -0.29    0.50 
   9   0   2    0.08    0.16 
  -9   0  -2   -0.10    0.31 
  -9  -1   2    0.05    0.29 
  -9  -1   2    1.87    0.44 
   9  -1  -2    0.18    0.23 
   9  -1  -2    0.38    0.51 
   9  -1  -2    0.26    0.35 
   9   1  -2    0.05    0.47 
   9   1  -2    0.21    0.31 
  -9   1   2    0.20    0.26 
  -9   1   2    0.02    0.46 
   9   1  -2    0.43    0.24 
  -9   1   2   -0.16    0.46 
   8  -1  -2    0.62    0.26 
  -8  -1   2   -0.32    0.34 
   8  -1  -2    0.80    0.20 
   8  -1  -2    0.44    0.34 
   8   1  -2    0.78    0.34 
   8   1  -2    0.76    0.25 
  -8   1   2    0.35    0.27 
  -8   1   2    0.29    0.29 
   8   1  -2    0.52    0.21 
   7  -1  -2    4.84    0.43 
  -7  -1   2    5.30    0.35 
   7  -1  -2    4.99    0.37 
   7  -1  -2    5.21    0.33 
   7   1  -2    5.25    0.36 
   7   1  -2    4.86    0.34 
   7   1  -2    5.30    0.39 
  -7   1   2    4.68    0.34 
  -7   1   2    5.50    0.50 
   6  -1  -2    0.39    0.15 
  -6  -1   2    0.54    0.21 
   6  -1  -2    0.65    0.14 
  -6  -1   2    0.71    0.22 
  -6  -1   2    0.26    0.14 
   6  -1  -2    0.33    0.20 
   6   1  -2    0.30    0.18 
   6   1  -2    0.27    0.12 
  -6   1   2    0.77    0.21 
   6   1  -2    0.35    0.19 
  -6   1   2    0.29    0.14 
   6   1  -2    0.16    0.14 
  -6   1   2    0.59    0.21 
   5  -1  -2    3.02    0.26 
   5  -1  -2    2.95    0.24 
   5  -1  -2    2.89    0.21 
  -5  -1   2    2.96    0.20 
   5  -1  -2    3.40    0.24 
  -5  -1   2    3.09    0.32 
  -5  -1   2    3.04    0.28 
   5   1  -2    3.41    0.13 
   5   1  -2    3.34    0.23 
  -5   1   2    3.04    0.22 
   5   1  -2    3.23    0.24 
  -5   1   2    3.05    0.28 
  -5   1   2    3.16    0.31 
   5   1  -2    2.84    0.22 
   5   1  -2    3.29    0.22 
  -4  -1   2  177.63    4.06 
   4  -1  -2  182.39    4.01 
   4  -1  -2  178.18    4.06 
   4  -1  -2  175.14    4.06 
  -4  -1   2  177.38    4.05 
   4  -1  -2  177.42    4.05 
  -4  -1   2  179.83    4.11 
  -4   1   2  174.86    4.06 
   4   1  -2  174.34    4.07 
   4   1  -2  176.86    4.05 
  -4   1   2  174.35    4.18 
   4   1  -2  178.50    4.00 
   4   1  -2  183.11    4.00 
  -4   1   2  180.32    4.09 
   4   1  -2  172.12    4.04 
  -3  -1   2    0.60    0.08 
  -3  -1   2    0.69    0.12 
  -3  -1   2    0.51    0.09 
   3  -1  -2    0.58    0.09 
   3  -1  -2    0.64    0.11 
  -3  -1   2    0.83    0.10 
   3   1  -2    0.73    0.10 
  -3   1   2    0.58    0.09 
   3   1  -2    0.59    0.09 
   3   1  -2    0.50    0.08 
  -3   1   2    0.53    0.09 
   3   1  -2    0.85    0.09 
   3   1  -2    0.69    0.06 
  -3   1   2    0.73    0.14 
  -2  -1   2  310.12    6.82 
  -2  -1   2  310.41    6.98 
   2  -1  -2  306.09    6.90 
   2  -1  -2  301.32    6.89 
  -2  -1   2  294.79    6.82 
  -2  -1   2  301.31    6.84 
   2   1  -2  293.24    6.83 
   2   1  -2  306.41    6.91 
   2   1  -2  317.28    6.81 
  -2   1   2  302.49    6.89 
   2   1  -2  296.03    6.87 
   2   1  -2  312.67    6.90 
  -2   1   2  293.80    6.82 
  -1  -1   2   32.37    0.85 
  -1  -1   2   35.04    0.83 
  -1  -1   2   35.76    0.80 
  -1  -1   2   34.68    0.80 
   1  -1  -2   35.58    0.83 
   1  -1  -2   35.21    0.89 
  -1  -1   2   34.84    0.82 
  -1   1   2   35.01    0.83 
   1   1  -2   34.40    0.80 
   1   1  -2   34.65    0.83 
   1   1  -2   34.40    0.85 
   1   1  -2   35.22    0.82 
  -1   1   2   34.69    0.88 
   0  -1  -2   21.74    0.57 
   0  -1   2   23.27    0.58 
   0  -1   2   22.40    0.53 
   0  -1   2   22.46    0.55 
   0  -1   2   23.14    0.58 
   0   1  -2   23.67    0.55 
   0   1   2   22.93    0.55 
   0   1   2   23.31    0.58 
   0   1  -2   23.73    0.53 
  -1  -1  -2  254.14    5.68 
  -1  -1  -2  254.57    5.69 
   1  -1   2  250.94    5.69 
   1  -1   2  254.24    5.78 
  -1  -1  -2  249.73    5.69 
  -1  -1  -2  248.06    5.67 
   1  -1   2  255.77    5.71 
   1   1   2  247.16    5.68 
   1   1   2  255.75    5.68 
  -1   1  -2  263.93    5.68 
  -1   1  -2  248.90    5.72 
  -1   1  -2  242.10    5.65 
  -2  -1  -2    7.02    0.21 
  -2  -1  -2    7.20    0.23 
   2  -1   2    6.48    0.19 
  -2  -1  -2    6.81    0.18 
   2  -1   2    7.11    0.21 
  -2  -1  -2    6.89    0.21 
   2  -1   2    6.99    0.22 
   2  -1   2    6.73    0.22 
  -2   1  -2    7.32    0.23 
   2   1   2    6.96    0.18 
   2   1   2    6.84    0.21 
  -2   1  -2    6.63    0.23 
   2   1   2    6.97    0.21 
  -2   1  -2    6.73    0.22 
   2   1   2    7.02    0.20 
   3  -1   2    1.25    0.11 
   3  -1   2    1.11    0.09 
   3  -1   2    1.40    0.12 
  -3  -1  -2    1.18    0.09 
  -3  -1  -2    1.26    0.11 
   3  -1   2    1.36    0.15 
  -3  -1  -2    1.28    0.11 
  -3  -1  -2    1.28    0.12 
   3   1   2    1.32    0.08 
   3   1   2    1.28    0.11 
  -3   1  -2    1.25    0.12 
  -3   1  -2    1.28    0.13 
   3   1   2    1.29    0.09 
   3   1   2    1.30    0.11 
   4  -1   2    2.36    0.16 
  -4  -1  -2    1.97    0.17 
  -4  -1  -2    2.02    0.15 
   4  -1   2    1.93    0.14 
   4  -1   2    2.12    0.16 
  -4  -1  -2    1.93    0.17 
  -4  -1  -2    1.96    0.15 
   4   1   2    1.97    0.15 
  -4   1  -2    1.98    0.17 
   4   1   2    2.06    0.13 
  -4   1  -2    1.86    0.18 
   4   1   2    2.16    0.12 
   4   1   2    2.12    0.19 
   5  -1   2    3.73    0.21 
   5  -1   2    3.83    0.18 
  -5  -1  -2    3.70    0.23 
  -5  -1  -2    4.06    0.25 
  -5  -1  -2    3.82    0.24 
   5  -1   2    3.31    0.29 
   5   1   2    3.86    0.19 
   5   1   2    4.04    0.21 
   5   1   2    4.01    0.30 
  -5   1  -2    3.80    0.26 
   5   1   2    3.99    0.28 
   5   1   2    3.70    0.18 
  -5   1  -2    3.67    0.25 
   6  -1   2    7.18    0.42 
  -6  -1  -2    7.24    0.33 
  -6  -1  -2    7.17    0.36 
   6  -1   2    6.77    0.29 
  -6  -1  -2    7.11    0.33 
   6  -1   2    5.73    0.38 
   6   1   2    6.93    0.28 
   6   1   2    7.55    0.40 
   6   1   2    6.74    0.27 
  -6   1  -2    6.94    0.36 
   6   1   2    6.88    0.27 
  -6   1  -2    7.21    0.37 
  -6   1  -2    7.20    0.33 
  -7  -1  -2    0.27    0.17 
   7  -1   2    0.03    0.12 
  -7  -1  -2    0.15    0.16 
   7  -1   2    0.21    0.15 
  -7  -1  -2    0.09    0.16 
   7  -1   2    0.09    0.28 
   7   1   2    0.28    0.12 
   7   1   2    0.31    0.25 
   7   1   2    0.11    0.12 
  -7   1  -2    0.21    0.21 
  -7   1  -2    0.38    0.19 
   7   1   2    0.12    0.10 
  -7   1  -2    0.07    0.16 
   7   1   2    0.34    0.10 
   8  -1   2    0.85    0.20 
  -8  -1  -2    0.18    0.24 
   8  -1   2    0.74    0.17 
   8  -1   2    0.61    0.38 
  -8  -1  -2   -0.24    0.17 
  -8  -1  -2   -0.09    0.17 
   8   1   2    0.79    0.17 
   8   1   2    0.75    0.15 
  -8   1  -2    0.16    0.25 
   8   1   2    0.64    0.38 
  -8   1  -2    0.17    0.21 
  -8   1  -2    0.79    0.25 
   9  -1   2    1.92    0.25 
   9  -1   2    1.50    0.55 
  -9  -1  -2    1.48    0.35 
   9  -1   2    1.86    0.22 
   9   1   2    1.19    0.52 
  -9   1  -2    1.32    0.37 
   9   1   2    2.16    0.18 
   9   1   2    2.20    0.17 
  -9  -2   2    1.81    0.35 
   9  -2  -2    1.87    0.55 
   9  -2  -2    2.32    0.31 
  -9  -2   2    3.44    0.48 
   9  -2  -2    2.51    0.41 
  -9   2   2    0.40    0.46 
  -9   2   2    2.29    0.56 
   9   2  -2    1.90    0.31 
   9   2  -2    1.91    0.55 
   9   2  -2    2.31    0.34 
  -9   2   2    2.02    0.38 
  -8  -2   2    0.15    0.34 
   8  -2  -2    0.50    0.20 
   8  -2  -2    0.35    0.37 
   8  -2  -2    0.77    0.28 
   8   2  -2    0.38    0.24 
   8   2  -2    0.74    0.22 
   8   2  -2    0.74    0.37 
  -8   2   2    0.11    0.35 
  -8   2   2    0.29    0.37 
  -8   2   2    0.37    0.28 
  -7  -2   2    0.56    0.27 
  -7  -2   2    0.45    0.18 
  -7  -2   2    0.94    0.31 
   7  -2  -2    0.89    0.18 
   7  -2  -2    0.64    0.29 
  -7   2   2    0.82    0.28 
   7   2  -2    1.00    0.21 
  -7   2   2    0.40    0.19 
   7   2  -2    0.76    0.19 
  -7   2   2    0.37    0.26 
   7   2  -2    0.67    0.26 
  -6  -2   2    8.09    0.47 
   6  -2  -2    7.06    0.34 
   6  -2  -2    7.08    0.40 
  -6  -2   2    7.67    0.36 
  -6  -2   2    7.26    0.49 
   6  -2  -2    7.55    0.43 
   6   2  -2    7.26    0.40 
  -6   2   2    8.10    0.51 
  -6   2   2    6.64    0.36 
   6   2  -2    7.70    0.37 
   6   2  -2    7.23    0.36 
   6   2  -2    7.50    0.36 
   6   2  -2    7.13    0.28 
  -6   2   2    7.22    0.44 
   5  -2  -2    0.49    0.12 
  -5  -2   2    0.70    0.18 
   5  -2  -2    0.45    0.17 
  -5  -2   2    0.46    0.12 
   5  -2  -2    0.61    0.17 
  -5  -2   2    0.54    0.14 
   5  -2  -2    0.65    0.17 
  -5  -2   2    0.74    0.16 
  -5   2   2    0.52    0.14 
  -5   2   2    0.66    0.16 
   5   2  -2    0.58    0.14 
   5   2  -2    0.75    0.11 
   5   2  -2    0.63    0.13 
   5   2  -2    0.43    0.12 
   5   2  -2    0.66    0.14 
  -5   2   2    0.88    0.19 
  -4  -2   2   72.80    1.70 
  -4  -2   2   71.44    1.70 
   4  -2  -2   70.33    1.71 
  -4  -2   2   69.03    1.78 
  -4  -2   2   72.22    1.71 
   4  -2  -2   70.20    1.85 
  -4  -2   2   70.78    1.64 
   4   2  -2   71.61    1.70 
  -4   2   2   69.80    1.71 
   4   2  -2   73.76    1.64 
   4   2  -2   72.77    1.70 
   4   2  -2   71.98    1.69 
  -4   2   2   68.88    1.81 
   4   2  -2   70.70    1.74 
  -4   2   2   73.81    1.75 
  -3  -2   2   23.56    0.60 
   3  -2  -2   22.94    0.73 
   3  -2  -2   23.23    0.62 
  -3  -2   2   22.50    0.67 
  -3  -2   2   22.26    0.60 
  -3  -2   2   22.67    0.61 
  -3  -2   2   23.18    0.55 
   3   2  -2   24.00    0.56 
  -3   2   2   22.04    0.69 
  -3   2   2   22.65    0.56 
   3   2  -2   23.27    0.62 
  -3   2   2   23.71    0.64 
   3   2  -2   22.33    0.65 
   3   2  -2   23.37    0.59 
   3   2  -2   23.15    0.61 
  -2  -2   2    2.89    0.10 
  -2  -2   2    2.61    0.14 
  -2  -2   2    2.62    0.19 
   2  -2  -2    2.82    0.21 
   2  -2  -2    2.90    0.14 
  -2  -2   2    2.73    0.13 
   2   2  -2    2.72    0.18 
   2   2  -2    2.88    0.16 
  -2   2   2    3.04    0.20 
   2   2  -2    2.92    0.14 
  -2   2   2    2.83    0.16 
   2   2  -2    2.75    0.13 
  -1  -2   2   23.34    0.65 
  -1  -2   2   23.55    0.59 
  -1  -2   2   24.53    0.56 
  -1  -2   2   22.73    0.62 
   1  -2  -2   23.82    0.65 
   1  -2  -2   22.91    0.59 
   1   2  -2   23.03    0.56 
  -1   2   2   22.94    0.59 
   1   2  -2   22.96    0.58 
  -1   2   2   23.67    0.66 
   1   2  -2   22.03    0.62 
   1   2  -2   23.24    0.64 
   0  -2  -2   31.60    0.80 
   0  -2  -2   31.84    0.74 
   0  -2   2   29.38    0.78 
   0  -2   2   29.82    0.80 
   0  -2  -2   31.12    0.70 
   0  -2   2   30.32    0.74 
   0  -2   2   31.03    0.71 
   0   2  -2   30.44    0.80 
   0   2   2   29.75    0.79 
   0   2   2   29.99    0.73 
   0   2  -2   31.52    0.74 
   0   2  -2   30.90    0.78 
   1  -2   2  353.27    8.04 
   1  -2   2  357.81    8.13 
   1  -2   2  352.92    8.09 
  -1  -2  -2  352.68    8.04 
  -1  -2  -2  360.69    8.12 
  -1  -2  -2  366.43    8.18 
   1   2   2  359.42    8.11 
  -1   2  -2  346.39    8.03 
   1   2   2  359.40    8.05 
  -1   2  -2  375.22    8.19 
   1   2   2  354.43    8.02 
  -1   2  -2  345.84    8.01 
   2  -2   2   36.09    0.92 
  -2  -2  -2   35.95    0.84 
   2  -2   2   35.12    0.89 
  -2  -2  -2   34.99    0.84 
   2  -2   2   36.60    0.85 
  -2  -2  -2   35.78    0.84 
   2   2   2   36.22    0.84 
   2   2   2   34.80    0.88 
   2   2   2   36.10    0.84 
  -2   2  -2   35.14    0.88 
  -2   2  -2   34.19    0.91 
  -2   2  -2   35.71    0.85 
  -3  -2  -2    3.11    0.15 
  -3  -2  -2    2.99    0.17 
  -3  -2  -2    2.79    0.17 
   3  -2   2    3.04    0.18 
   3  -2   2    2.91    0.13 
  -3  -2  -2    3.01    0.13 
   3  -2   2    3.04    0.21 
   3  -2   2    3.09    0.17 
   3   2   2    2.66    0.16 
  -3   2  -2    2.90    0.18 
  -3   2  -2    3.02    0.15 
   3   2   2    3.06    0.13 
  -3   2  -2    2.95    0.15 
   3   2   2    3.01    0.17 
   3   2   2    3.04    0.16 
  -3   2  -2    3.11    0.21 
  -4  -2  -2    0.99    0.13 
   4  -2   2    1.03    0.16 
  -4  -2  -2    0.80    0.12 
   4  -2   2    1.03    0.11 
  -4  -2  -2    0.98    0.11 
   4  -2   2    1.00    0.11 
   4  -2   2    1.14    0.17 
  -4  -2  -2    0.99    0.09 
  -4   2  -2    0.95    0.16 
  -4   2  -2    1.01    0.10 
   4   2   2    0.79    0.12 
   4   2   2    1.02    0.13 
  -4   2  -2    0.87    0.11 
   4   2   2    1.02    0.09 
  -4   2  -2    0.70    0.12 
   5  -2   2   -0.06    0.06 
  -5  -2  -2   -0.01    0.10 
  -5  -2  -2   -0.18    0.11 
  -5  -2  -2    0.06    0.11 
  -5  -2  -2   -0.04    0.10 
   5  -2   2   -0.02    0.07 
   5  -2   2   -0.03    0.12 
   5   2   2    0.04    0.14 
  -5   2  -2   -0.16    0.12 
   5   2   2    0.01    0.17 
  -5   2  -2    0.12    0.14 
   5   2   2    0.07    0.08 
  -5   2  -2   -0.03    0.10 
   5   2   2    0.01    0.10 
   6  -2   2    0.80    0.16 
  -6  -2  -2    0.88    0.17 
   6  -2   2    0.99    0.12 
  -6  -2  -2    0.79    0.16 
   6  -2   2    0.70    0.23 
  -6  -2  -2    0.87    0.18 
  -6   2  -2    1.06    0.22 
   6   2   2    0.87    0.14 
   6   2   2    0.70    0.12 
   6   2   2    0.92    0.15 
   6   2   2    1.13    0.23 
  -6   2  -2    0.74    0.18 
   7  -2   2    0.96    0.30 
  -7  -2  -2    0.64    0.19 
  -7  -2  -2    1.19    0.18 
   7  -2   2    0.80    0.19 
   7   2   2    0.93    0.17 
  -7   2  -2    1.16    0.24 
   7   2   2    0.70    0.16 
   7   2   2    1.13    0.15 
  -7   2  -2    1.09    0.28 
   7   2   2    0.90    0.29 
   7   2   2    1.16    0.16 
   8  -2   2    0.52    0.23 
  -8  -2  -2    0.09    0.18 
  -8  -2  -2    0.53    0.26 
   8  -2   2    0.71    0.19 
  -8  -2  -2   -0.11    0.17 
   8  -2   2    0.37    0.42 
   8   2   2    0.66    0.38 
   8   2   2    0.74    0.17 
   8   2   2    0.69    0.17 
  -8   2  -2    0.46    0.31 
  -8   2  -2   -0.13    0.22 
  -8   2  -2    0.24    0.29 
   9  -2   2   -0.10    0.23 
  -9  -2  -2    0.30    0.33 
   9  -2   2    0.18    0.28 
   9  -2   2   -0.20    0.59 
  -9   2  -2    0.30    0.30 
   9   2   2   -0.03    0.15 
   9   2   2    0.06    0.15 
  -9   2  -2   -0.44    0.29 
   9   2   2    0.20    0.52 
   9  -3  -2    0.12    0.56 
   9  -3  -2    0.92    0.40 
   9  -3  -2    0.87    0.30 
  -9  -3   2    0.56    0.32 
  -9  -3   2    1.64    0.58 
   9   3  -2    0.33    0.49 
  -9   3   2    1.14    0.57 
   9   3  -2    0.70    0.30 
  -9   3   2    0.65    0.35 
   9   3  -2    1.16    0.34 
  -8  -3   2    6.38    0.58 
   8  -3  -2    5.88    0.53 
   8  -3  -2    6.19    0.43 
   8  -3  -2    6.40    0.57 
  -8  -3   2    5.78    0.47 
  -8   3   2    5.64    0.50 
   8   3  -2    5.58    0.46 
  -8   3   2    6.25    0.60 
   8   3  -2    6.20    0.46 
   8   3  -2    6.22    0.47 
  -7  -3   2    0.08    0.26 
   7  -3  -2    0.86    0.28 
  -7  -3   2    0.29    0.31 
   7  -3  -2    0.80    0.18 
   7  -3  -2    0.72    0.31 
  -7  -3   2    0.79    0.21 
  -7   3   2    0.83    0.21 
   7   3  -2    0.70    0.24 
   7   3  -2    0.80    0.27 
  -7   3   2   -0.15    0.26 
   7   3  -2    0.93    0.16 
   7   3  -2    0.75    0.21 
  -6  -3   2    3.34    0.32 
  -6  -3   2    2.81    0.25 
  -6  -3   2    3.09    0.34 
  -6  -3   2    2.92    0.28 
   6  -3  -2    3.00    0.26 
   6  -3  -2    2.86    0.42 
   6  -3  -2    3.35    0.31 
   6   3  -2    2.76    0.26 
  -6   3   2    2.72    0.29 
   6   3  -2    3.02    0.26 
   6   3  -2    2.98    0.28 
  -6   3   2    2.49    0.34 
  -6   3   2    2.61    0.26 
   6   3  -2    3.12    0.26 
  -5  -3   2    2.42    0.22 
   5  -3  -2    1.97    0.29 
  -5  -3   2    2.00    0.16 
  -5  -3   2    2.09    0.26 
  -5  -3   2    1.97    0.20 
   5  -3  -2    1.75    0.18 
  -5  -3   2    2.12    0.21 
   5   3  -2    2.29    0.23 
   5   3  -2    1.96    0.19 
   5   3  -2    1.65    0.17 
  -5   3   2    1.81    0.20 
   5   3  -2    1.95    0.22 
  -5   3   2    2.42    0.25 
  -5   3   2    2.13    0.27 
  -4  -3   2   13.26    0.53 
  -4  -3   2   14.68    0.44 
  -4  -3   2   14.57    0.45 
  -4  -3   2   14.14    0.38 
   4  -3  -2   13.83    0.45 
  -4  -3   2   13.69    0.44 
   4  -3  -2   14.47    0.60 
  -4   3   2   14.31    0.39 
   4   3  -2   13.52    0.44 
  -4   3   2   13.85    0.49 
   4   3  -2   13.89    0.47 
   4   3  -2   13.85    0.49 
  -4   3   2   14.19    0.56 
   4   3  -2   14.10    0.43 
  -3  -3   2   42.16    1.14 
  -3  -3   2   41.34    1.02 
  -3  -3   2   42.15    0.98 
   3  -3  -2   41.62    1.05 
  -3  -3   2   40.76    1.04 
   3  -3  -2   42.33    1.20 
  -3   3   2   41.57    1.17 
  -3   3   2   41.44    1.03 
   3   3  -2   42.50    1.09 
   3   3  -2   42.90    1.04 
   3   3  -2   41.32    1.11 
   3   3  -2   42.54    1.01 
  -3   3   2   43.43    1.07 
   2  -3  -2    0.08    0.09 
   2  -3  -2    0.09    0.06 
  -2  -3   2    0.17    0.06 
  -2  -3   2    0.10    0.06 
  -2  -3   2    0.14    0.10 
   2   3  -2    0.12    0.08 
   2   3  -2    0.17    0.07 
   2   3  -2    0.09    0.09 
  -2   3   2    0.11    0.07 
   2   3  -2    0.11    0.06 
  -2   3   2    0.14    0.12 
  -1  -3   2   42.38    1.15 
   1  -3  -2   45.13    1.07 
  -1  -3   2   44.09    1.07 
  -1  -3   2   45.12    1.13 
   1  -3  -2   45.97    1.17 
  -1  -3   2   42.23    1.03 
   1   3  -2   44.02    1.15 
   1   3  -2   44.11    1.13 
  -1   3   2   44.47    1.16 
   1   3  -2   45.21    1.03 
   1   3  -2   42.55    1.06 
  -1   3   2   46.21    1.08 
   0  -3  -2    0.02    0.04 
   0  -3   2    0.10    0.07 
   0  -3   2    0.09    0.05 
   0  -3  -2    0.06    0.03 
   0  -3   2    0.05    0.08 
   0  -3   2    0.06    0.04 
   0  -3  -2    0.04    0.07 
   0   3   2    0.09    0.09 
   0   3  -2    0.12    0.05 
   0   3  -2    0.03    0.07 
   0   3   2    0.02    0.05 
   0   3  -2    0.09    0.09 
  -1  -3  -2    3.41    0.21 
   1  -3   2    2.97    0.18 
  -1  -3  -2    2.97    0.12 
  -1  -3  -2    3.04    0.13 
   1  -3   2    3.00    0.14 
   1  -3   2    2.85    0.21 
  -1   3  -2    2.96    0.20 
   1   3   2    3.14    0.11 
  -1   3  -2    3.15    0.18 
   1   3   2    2.96    0.20 
  -1   3  -2    3.22    0.15 
   1   3   2    3.23    0.14 
  -2  -3  -2   66.15    1.48 
   2  -3   2   64.78    1.60 
   2  -3   2   60.62    1.50 
  -2  -3  -2   64.60    1.49 
  -2  -3  -2   64.28    1.48 
   2  -3   2   64.07    1.56 
  -2  -3  -2   64.52    1.57 
   2   3   2   63.96    1.57 
  -2   3  -2   62.69    1.55 
   2   3   2   61.63    1.47 
  -2   3  -2   64.74    1.51 
  -2   3  -2   61.92    1.59 
   2   3   2   65.63    1.49 
  -3  -3  -2   28.28    0.70 
   3  -3   2   28.05    0.81 
  -3  -3  -2   27.44    0.78 
  -3  -3  -2   27.95    0.71 
   3  -3   2   28.15    0.72 
  -3  -3  -2   28.05    0.72 
   3  -3   2   28.70    0.76 
   3   3   2   28.33    0.70 
   3   3   2   27.83    0.77 
  -3   3  -2   28.34    0.75 
  -3   3  -2   28.61    0.74 
   3   3   2   27.79    0.70 
  -3   3  -2   29.05    0.82 
  -3   3  -2   27.28    0.72 
  -4  -3  -2   16.56    0.50 
   4  -3   2   16.54    0.50 
   4  -3   2   16.19    0.47 
  -4  -3  -2   16.46    0.47 
  -4  -3  -2   16.85    0.46 
   4  -3   2   16.53    0.61 
  -4   3  -2   16.87    0.48 
  -4   3  -2   16.82    0.50 
   4   3   2   16.27    0.48 
  -4   3  -2   16.25    0.52 
  -4   3  -2   16.52    0.59 
   4   3   2   15.72    0.50 
   4   3   2   16.11    0.45 
   5  -3   2    0.64    0.20 
  -5  -3  -2    0.62    0.14 
   5  -3   2    0.63    0.11 
  -5  -3  -2    0.43    0.12 
  -5  -3  -2    0.67    0.17 
  -5  -3  -2    0.71    0.12 
   5  -3   2    0.55    0.11 
   5   3   2    0.54    0.12 
  -5   3  -2    0.42    0.14 
  -5   3  -2    0.69    0.21 
  -5   3  -2    0.61    0.15 
   5   3   2    0.71    0.11 
  -5   3  -2    0.62    0.10 
   5   3   2    0.52    0.15 
   6  -3   2    4.40    0.35 
   6  -3   2    4.52    0.25 
  -6  -3  -2    4.76    0.30 
  -6  -3  -2    4.02    0.33 
  -6  -3  -2    4.10    0.31 
  -6  -3  -2    3.89    0.35 
  -6   3  -2    4.64    0.32 
   6   3   2    4.63    0.25 
  -6   3  -2    4.31    0.34 
   6   3   2    4.08    0.35 
  -6   3  -2    4.72    0.42 
  -7  -3  -2    1.08    0.21 
   7  -3   2    1.08    0.35 
   7  -3   2    0.94    0.23 
   7  -3   2    0.70    0.15 
  -7  -3  -2    1.09    0.24 
   7   3   2    0.80    0.21 
   7   3   2    0.85    0.19 
  -7   3  -2    0.86    0.24 
   7   3   2    0.96    0.16 
   7   3   2    1.08    0.18 
   7   3   2    0.89    0.27 
   8  -3   2    1.25    0.43 
   8  -3   2    1.31    0.28 
  -8  -3  -2    1.61    0.34 
  -8   3  -2    1.29    0.32 
   8   3   2    1.68    0.23 
   8   3   2    1.54    0.21 
   8   3   2    1.18    0.22 
   8   3   2    1.55    0.41 
   8   3   2    1.73    0.20 
  -8   3  -2    0.43    0.27 
   9  -3   2    0.37    0.61 
   9  -3   2    0.04    0.33 
   9   3   2   -0.09    0.50 
   9   3   2    0.14    0.17 
  -9   3  -2   -0.33    0.32 
  -9   3  -2   -0.45    0.41 
  -9  -4   2    2.21    0.64 
   9  -4  -2    0.60    0.60 
   9  -4  -2    1.56    0.48 
  -9   4   2    1.62    0.68 
  -9   4   2    1.32    0.38 
   9   4  -2    1.08    0.56 
   9   4  -2    1.94    0.37 
   8  -4  -2    0.39    0.43 
   8  -4  -2    0.49    0.23 
  -8  -4   2    0.16    0.40 
   8  -4  -2    0.10    0.36 
  -8  -4   2    0.88    0.43 
  -8   4   2   -0.26    0.44 
  -8   4   2   -0.06    0.41 
   8   4  -2    0.55    0.39 
   8   4  -2    0.63    0.26 
  -8   4   2    0.32    0.28 
   8   4  -2    0.29    0.26 
   8   4  -2    0.75    0.20 
   7  -4  -2    0.35    0.19 
  -7  -4   2   -0.21    0.30 
   7  -4  -2    0.09    0.31 
   7  -4  -2    0.10    0.29 
  -7   4   2   -0.07    0.20 
   7   4  -2    0.31    0.22 
   7   4  -2   -0.01    0.20 
  -7   4   2   -0.09    0.28 
   7   4  -2    0.25    0.26 
   7   4  -2    0.49    0.19 
  -6  -4   2    0.08    0.12 
   6  -4  -2    0.14    0.27 
  -6  -4   2    0.18    0.24 
  -6  -4   2   -0.07    0.26 
   6  -4  -2   -0.03    0.14 
  -6  -4   2    0.15    0.19 
   6   4  -2    0.07    0.16 
   6   4  -2    0.16    0.16 
  -6   4   2   -0.36    0.24 
   6   4  -2   -0.03    0.20 
   6   4  -2   -0.23    0.17 
  -6   4   2   -0.12    0.15 
  -6   4   2   -0.05    0.22 
  -5  -4   2    0.44    0.14 
  -5  -4   2    0.28    0.18 
   5  -4  -2    0.22    0.12 
  -5  -4   2    0.28    0.10 
   5  -4  -2    0.57    0.24 
  -5  -4   2    0.32    0.21 
  -5   4   2    0.06    0.21 
   5   4  -2    0.31    0.17 
  -5   4   2    0.30    0.17 
   5   4  -2    0.34    0.16 
   5   4  -2    0.36    0.15 
  -5   4   2    0.51    0.16 
  -5   4   2    0.40    0.09 
   5   4  -2    0.35    0.14 
   4  -4  -2   12.69    0.60 
  -4  -4   2   12.88    0.36 
  -4  -4   2   13.15    0.44 
  -4  -4   2   12.83    0.56 
  -4  -4   2   13.38    0.44 
   4  -4  -2   12.52    0.44 
  -4   4   2   12.91    0.48 
   4   4  -2   13.45    0.50 
  -4   4   2   12.67    0.58 
   4   4  -2   13.48    0.42 
   4   4  -2   12.80    0.51 
   4   4  -2   13.05    0.43 
  -4   4   2   12.90    0.42 
  -3  -4   2    6.60    0.39 
  -3  -4   2    6.57    0.27 
   3  -4  -2    6.71    0.28 
   3  -4  -2    6.65    0.39 
  -3  -4   2    6.89    0.22 
  -3  -4   2    6.85    0.27 
  -3   4   2    6.30    0.39 
   3   4  -2    6.84    0.28 
  -3   4   2    7.32    0.32 
   3   4  -2    6.63    0.25 
   3   4  -2    7.23    0.36 
   3   4  -2    6.85    0.33 
  -3   4   2    6.87    0.29 
  -2  -4   2    7.50    0.25 
   2  -4  -2    7.22    0.28 
  -2  -4   2    7.04    0.27 
  -2  -4   2    7.37    0.37 
   2   4  -2    7.41    0.34 
  -2   4   2    6.85    0.37 
   2   4  -2    7.21    0.27 
   2   4  -2    6.94    0.36 
   2   4  -2    7.76    0.24 
  -2   4   2    6.90    0.29 
  -2   4   2    7.81    0.32 
   1  -4  -2   19.06    0.63 
   1  -4  -2   19.29    0.52 
  -1  -4   2   18.59    0.52 
  -1  -4   2   19.09    0.48 
  -1  -4   2   18.40    0.63 
  -1   4   2   17.98    0.63 
   1   4  -2   18.98    0.59 
   1   4  -2   18.39    0.62 
  -1   4   2   18.19    0.52 
   1   4  -2   18.72    0.52 
   1   4  -2   18.26    0.47 
   0  -4  -2    0.76    0.09 
   0  -4   2    0.70    0.13 
   0  -4   2    0.67    0.09 
   0  -4   2    0.66    0.15 
   0  -4  -2    0.75    0.06 
   0  -4   2    0.80    0.07 
   0  -4  -2    0.95    0.16 
   0   4  -2    0.77    0.13 
   0   4  -2    0.66    0.13 
   0   4  -2    0.77    0.10 
   0   4   2    0.70    0.09 
   0   4   2    0.90    0.16 
  -1  -4  -2   33.37    0.78 
   1  -4   2   31.80    0.90 
   1  -4   2   33.23    0.83 
  -1  -4  -2   32.64    0.93 
   1  -4   2   32.15    0.95 
  -1  -4  -2   33.15    0.82 
   1   4   2   33.31    0.94 
  -1   4  -2   32.03    0.89 
   1   4   2   33.40    0.82 
  -1   4  -2   31.49    0.83 
  -1   4  -2   32.80    0.94 
   1   4   2   33.59    0.78 
   2  -4   2    0.60    0.12 
  -2  -4  -2    0.97    0.10 
  -2  -4  -2    0.97    0.10 
  -2  -4  -2    0.77    0.15 
   2  -4   2    0.88    0.11 
   2  -4   2    0.57    0.14 
   2   4   2    0.71    0.09 
  -2   4  -2    0.74    0.17 
  -2   4  -2    0.68    0.10 
   2   4   2    0.66    0.08 
  -2   4  -2    0.75    0.13 
   2   4   2    0.77    0.15 
   3  -4   2    5.57    0.29 
  -3  -4  -2    5.75    0.23 
   3  -4   2    5.78    0.24 
  -3  -4  -2    5.93    0.25 
   3  -4   2    6.11    0.34 
  -3  -4  -2    6.15    0.34 
  -3  -4  -2    5.87    0.23 
   3   4   2    5.86    0.23 
  -3   4  -2    5.70    0.35 
   3   4   2    5.81    0.23 
  -3   4  -2    5.77    0.28 
   3   4   2    5.66    0.31 
  -3   4  -2    5.44    0.26 
  -4  -4  -2    1.77    0.16 
   4  -4   2    1.96    0.22 
  -4  -4  -2    1.86    0.15 
   4  -4   2    1.56    0.21 
  -4  -4  -2    1.93    0.18 
   4  -4   2    1.79    0.17 
  -4  -4  -2    1.77    0.22 
  -4   4  -2    1.59    0.24 
   4   4   2    1.94    0.17 
   4   4   2    1.93    0.16 
  -4   4  -2    1.66    0.17 
  -4   4  -2    1.90    0.19 
   4   4   2    1.65    0.20 
  -4   4  -2    1.99    0.20 
   5  -4   2    0.11    0.10 
  -5  -4  -2    0.02    0.09 
  -5  -4  -2    0.33    0.17 
   5  -4   2   -0.17    0.20 
  -5  -4  -2   -0.05    0.17 
   5   4   2    0.08    0.13 
   5   4   2    0.06    0.11 
   5   4   2   -0.03    0.14 
  -5   4  -2    0.18    0.14 
  -5   4  -2    0.18    0.11 
  -5   4  -2    0.07    0.20 
  -5   4  -2    0.14    0.14 
   6  -4   2    4.31    0.41 
  -6  -4  -2    4.26    0.29 
  -6  -4  -2    4.10    0.30 
   6  -4   2    3.99    0.27 
  -6  -4  -2    4.81    0.37 
   6   4   2    3.89    0.33 
   6   4   2    3.74    0.29 
  -6   4  -2    3.79    0.32 
   6   4   2    4.29    0.27 
  -6   4  -2    4.41    0.39 
  -7  -4  -2   -0.07    0.25 
   7  -4   2    1.13    0.29 
  -7  -4  -2    1.04    0.21 
  -7  -4  -2    1.01    0.27 
   7  -4   2    0.92    0.18 
   7   4   2    1.09    0.30 
   7   4   2    0.75    0.21 
   7   4   2    0.85    0.17 
  -7   4  -2    1.44    0.35 
   7   4   2    1.03    0.26 
   8  -4   2    4.62    0.39 
   8  -4   2    4.24    0.57 
  -8  -4  -2    3.54    0.41 
   8  -4   2    3.92    0.40 
  -8   4  -2    3.26    0.50 
   8   4   2    4.14    0.36 
   8   4   2    4.35    0.48 
   8   4   2    5.00    0.51 
   8   4   2    4.39    0.48 
  -8   4  -2    4.38    0.46 
   8   4   2    4.27    0.40 
   8  -5  -2    3.94    0.56 
   8  -5  -2    3.73    0.51 
   8  -5  -2    3.08    0.34 
   8   5  -2    3.73    0.37 
   8   5  -2    3.63    0.41 
   8   5  -2    3.35    0.45 
  -8   5   2    3.54    0.62 
  -8   5   2    2.48    0.37 
   8   5  -2    3.51    0.37 
  -7  -5   2    0.01    0.35 
   7  -5  -2    0.05    0.21 
  -7  -5   2    0.25    0.38 
  -7  -5   2    0.05    0.26 
  -7   5   2    0.86    0.42 
   7   5  -2   -0.34    0.22 
   7   5  -2    0.68    0.31 
   7   5  -2    0.52    0.26 
  -7   5   2   -0.05    0.32 
   7   5  -2    0.42    0.24 
  -6  -5   2    3.21    0.33 
   6  -5  -2    3.69    0.47 
  -6  -5   2    3.12    0.25 
   6  -5  -2    3.35    0.33 
  -6  -5   2    4.11    0.43 
  -6   5   2    3.19    0.31 
   6   5  -2    4.08    0.41 
   6   5  -2    3.34    0.29 
  -6   5   2    3.34    0.36 
   6   5  -2    3.41    0.34 
  -5  -5   2    4.54    0.40 
   5  -5  -2    5.61    0.57 
  -5  -5   2    5.17    0.47 
   5  -5  -2    4.59    0.31 
  -5  -5   2    4.76    0.31 
  -5  -5   2    4.66    0.24 
   5   5  -2    4.93    0.32 
   5   5  -2    5.26    0.39 
  -5   5   2    5.30    0.28 
   5   5  -2    5.13    0.41 
   5   5  -2    4.60    0.32 
  -5   5   2    4.20    0.44 
  -5   5   2    4.97    0.40 
  -4  -5   2    0.35    0.10 
   4  -5  -2    0.34    0.12 
  -4  -5   2    0.31    0.21 
  -4  -5   2    0.44    0.13 
   4  -5  -2    0.27    0.23 
  -4  -5   2    0.57    0.16 
   4   5  -2    0.41    0.13 
   4   5  -2    0.46    0.13 
   4   5  -2    0.29    0.16 
  -4   5   2    0.42    0.17 
  -4   5   2    0.53    0.14 
  -4   5   2    0.49    0.21 
   4   5  -2    0.32    0.19 
  -3  -5   2   -0.02    0.09 
  -3  -5   2    0.00    0.10 
   3  -5  -2    0.23    0.15 
   3  -5  -2    0.08    0.10 
  -3  -5   2    0.20    0.19 
  -3   5   2    0.00    0.11 
   3   5  -2   -0.06    0.16 
   3   5  -2    0.02    0.12 
  -3   5   2   -0.03    0.11 
  -3   5   2   -0.02    0.17 
   3   5  -2    0.12    0.11 
   3   5  -2   -0.11    0.09 
   2  -5  -2   57.43    1.57 
  -2  -5   2   56.92    1.35 
  -2  -5   2   57.28    1.41 
  -2  -5   2   61.38    1.58 
   2  -5  -2   57.60    1.41 
   2   5  -2   56.54    1.54 
   2   5  -2   55.91    1.50 
  -2   5   2   54.17    1.56 
   2   5  -2   58.21    1.35 
  -2   5   2   55.53    1.47 
   2   5  -2   56.71    1.40 
  -2   5   2   57.70    1.43 
  -1  -5   2   13.14    0.41 
   1  -5  -2   12.94    0.54 
  -1  -5   2   12.94    0.36 
   1  -5  -2   12.15    0.40 
  -1  -5   2   11.77    0.53 
  -1   5   2   12.49    0.54 
   1   5  -2   12.78    0.41 
   1   5  -2   12.64    0.52 
   1   5  -2   12.32    0.35 
  -1   5   2   12.63    0.42 
   1   5  -2   12.44    0.48 
   0  -5   2   19.06    0.50 
   0  -5   2   19.75    0.70 
   0  -5  -2   20.06    0.50 
   0  -5  -2   19.85    0.56 
   0  -5  -2   19.96    0.70 
   0  -5   2   19.78    0.56 
   0   5   2   19.84    0.70 
   0   5   2   19.43    0.57 
   0   5  -2   20.79    0.70 
   0   5  -2   19.88    0.57 
   0   5  -2   19.56    0.65 
   1  -5   2   17.89    0.53 
  -1  -5  -2   18.80    0.48 
  -1  -5  -2   18.45    0.53 
   1  -5   2   19.19    0.68 
  -1  -5  -2   18.52    0.66 
   1   5   2   18.20    0.66 
   1   5   2   18.95    0.47 
  -1   5  -2   17.87    0.66 
  -1   5  -2   17.71    0.60 
   1   5   2   17.98    0.53 
  -1   5  -2   19.18    0.55 
   2  -5   2    0.41    0.09 
   2  -5   2    0.28    0.14 
  -2  -5  -2    0.41    0.09 
  -2  -5  -2    0.62    0.18 
  -2  -5  -2    0.45    0.09 
  -2   5  -2    0.45    0.14 
   2   5   2    0.37    0.09 
   2   5   2    0.58    0.09 
  -2   5  -2    0.37    0.11 
  -2   5  -2    0.38    0.18 
   2   5   2    0.38    0.15 
  -3  -5  -2    9.05    0.31 
  -3  -5  -2    9.06    0.33 
  -3  -5  -2    8.87    0.32 
  -3  -5  -2    9.88    0.47 
   3  -5   2    8.94    0.46 
   3  -5   2    8.97    0.34 
   3   5   2    8.99    0.30 
   3   5   2    8.75    0.33 
   3   5   2    9.18    0.44 
  -3   5  -2    8.85    0.36 
  -3   5  -2    8.42    0.47 
  -3   5  -2    8.89    0.40 
   4  -5   2    0.62    0.12 
  -4  -5  -2    0.58    0.11 
  -4  -5  -2    0.67    0.20 
  -4  -5  -2    0.82    0.14 
   4  -5   2    0.28    0.19 
  -4  -5  -2    0.81    0.17 
   4   5   2    0.61    0.13 
  -4   5  -2    0.60    0.23 
   4   5   2    0.94    0.19 
  -4   5  -2    0.63    0.16 
   4   5   2    0.85    0.14 
  -4   5  -2    0.89    0.16 
  -5  -5  -2    4.45    0.29 
  -5  -5  -2    4.28    0.36 
  -5  -5  -2    4.15    0.42 
   5  -5   2    4.06    0.27 
   5  -5   2    3.89    0.40 
  -5  -5  -2    4.11    0.26 
  -5   5  -2    3.81    0.32 
  -5   5  -2    4.40    0.41 
  -5   5  -2    4.91    0.31 
   5   5   2    3.72    0.34 
   5   5   2    3.62    0.30 
  -5   5  -2    3.90    0.34 
   5   5   2    4.07    0.26 
  -6  -5  -2    1.73    0.21 
   6  -5   2    1.92    0.38 
  -6  -5  -2    1.43    0.21 
  -6  -5  -2    1.01    0.32 
   6  -5   2    1.47    0.20 
  -6   5  -2    1.44    0.36 
   6   5   2    1.89    0.30 
  -6   5  -2    1.58    0.25 
   6   5   2    1.62    0.19 
   6   5   2    1.15    0.22 
   6   5   2    1.44    0.25 
   7  -5   2    2.84    0.27 
  -7  -5  -2    2.46    0.27 
   7  -5   2    2.43    0.44 
  -7  -5  -2    2.33    0.26 
   7   5   2    2.51    0.27 
  -7   5  -2    1.94    0.32 
   7   5   2    3.18    0.36 
  -7   5  -2    2.24    0.44 
   7   5   2    2.56    0.25 
   7   5   2    2.19    0.36 
   8  -5   2    2.40    0.59 
   8  -5   2    3.28    0.45 
   8  -5   2    2.97    0.32 
  -8   5  -2    2.89    0.40 
   8   5   2    2.88    0.29 
   8   5   2    3.78    0.44 
  -8   5  -2    2.99    0.57 
   8   5   2    3.36    0.35 
   8   5   2    3.07    0.47 
   8  -6  -2    1.89    0.34 
  -8  -6   2    2.84    0.46 
   8  -6  -2    3.09    0.59 
  -8  -6   2   -0.01    0.56 
   8   6  -2    2.04    0.41 
  -8   6   2    2.13    0.36 
   8   6  -2    3.13    0.40 
  -8   6   2    2.21    0.67 
  -8   6   2   -0.07    0.51 
   8   6  -2    2.69    0.47 
   8   6  -2    3.37    0.45 
   7  -6  -2    0.11    0.23 
  -7  -6   2    0.40    0.40 
  -7  -6   2    0.48    0.44 
  -7  -6   2    0.15    0.19 
   7  -6  -2    0.87    0.47 
  -7  -6   2    0.28    0.26 
   7   6  -2    0.69    0.32 
   7   6  -2   -0.34    0.28 
  -7   6   2    0.15    0.37 
  -7   6   2   -0.06    0.48 
  -7   6   2    0.22    0.27 
   7   6  -2   -0.15    0.31 
   7   6  -2    0.32    0.26 
   6  -6  -2   13.70    0.89 
  -6  -6   2   11.77    0.61 
   6  -6  -2   13.09    0.54 
  -6  -6   2   13.34    0.45 
   6   6  -2   13.52    0.55 
  -6   6   2   13.33    0.68 
   6   6  -2   14.01    0.66 
  -6   6   2   13.68    0.84 
   6   6  -2   12.35    0.66 
   6   6  -2   12.42    0.55 
  -6   6   2   12.01    0.55 
  -5  -6   2    0.23    0.28 
   5  -6  -2    0.30    0.17 
  -5  -6   2    0.25    0.20 
  -5  -6   2    0.24    0.12 
  -5  -6   2    0.57    0.17 
   5   6  -2    0.35    0.17 
   5   6  -2    0.49    0.23 
   5   6  -2   -0.26    0.23 
  -5   6   2    0.17    0.22 
  -5   6   2    0.87    0.32 
  -5   6   2    0.22    0.15 
  -4  -6   2    0.07    0.25 
  -4  -6   2    0.11    0.10 
   4  -6  -2    0.22    0.12 
   4  -6  -2    0.11    0.23 
  -4  -6   2    0.07    0.13 
  -4  -6   2    0.12    0.15 
  -4   6   2    0.23    0.26 
   4   6  -2   -0.22    0.20 
  -4   6   2    0.32    0.19 
   4   6  -2    0.07    0.14 
  -4   6   2    0.14    0.15 
   4   6  -2    0.07    0.14 
   4   6  -2   -0.08    0.17 
  -3  -6   2    7.86    0.35 
   3  -6  -2    8.01    0.36 
  -3  -6   2    8.25    0.33 
   3  -6  -2    8.09    0.49 
  -3  -6   2    8.50    0.53 
  -3   6   2    7.61    0.51 
   3   6  -2    8.68    0.46 
  -3   6   2    7.87    0.39 
   3   6  -2    7.64    0.35 
   3   6  -2    8.13    0.31 
  -3   6   2    7.97    0.40 
   3   6  -2    8.26    0.49 
   2  -6  -2   28.06    0.96 
  -2  -6   2   28.94    0.97 
   2  -6  -2   27.88    0.79 
  -2  -6   2   28.52    0.74 
  -2  -6   2   27.80    0.79 
   2   6  -2   29.57    0.91 
  -2   6   2   28.62    0.98 
   2   6  -2   28.45    0.95 
  -2   6   2   28.84    0.82 
  -2   6   2   28.54    0.88 
   2   6  -2   28.39    0.72 
   2   6  -2   28.35    0.80 
   1  -6  -2   11.10    0.55 
   1  -6  -2   10.56    0.38 
  -1  -6   2   10.28    0.32 
  -1  -6   2   10.68    0.38 
  -1  -6   2   11.09    0.55 
   1   6  -2   10.64    0.32 
   1   6  -2    9.80    0.51 
   1   6  -2   10.72    0.39 
   1   6  -2    9.95    0.46 
  -1   6   2    9.74    0.39 
  -1   6   2    9.44    0.52 
   0  -6   2    5.86    0.22 
   0  -6   2    5.93    0.27 
   0  -6  -2    5.85    0.21 
   0  -6   2    5.86    0.40 
   0  -6  -2    6.10    0.27 
   0  -6  -2    5.67    0.41 
   0   6   2    6.00    0.28 
   0   6   2    5.63    0.40 
   0   6  -2    6.27    0.41 
   0   6  -2    5.70    0.28 
   0   6  -2    6.07    0.36 
   1  -6   2    5.49    0.21 
   1  -6   2    6.06    0.28 
   1  -6   2    5.03    0.41 
  -1  -6  -2    5.76    0.26 
  -1  -6  -2    5.89    0.40 
  -1  -6  -2    5.63    0.22 
   1   6   2    5.25    0.41 
  -1   6  -2    5.56    0.34 
  -1   6  -2    5.47    0.28 
   1   6   2    5.45    0.27 
   1   6   2    5.82    0.21 
  -1   6  -2    5.68    0.41 
   2  -6   2    4.39    0.39 
  -2  -6  -2    4.15    0.38 
  -2  -6  -2    4.30    0.22 
  -2  -6  -2    4.37    0.24 
   2  -6   2    4.41    0.25 
   2   6   2    4.08    0.24 
  -2   6  -2    4.38    0.32 
  -2   6  -2    4.50    0.27 
   2   6   2    4.46    0.20 
   2   6   2    4.31    0.38 
  -2   6  -2    3.84    0.39 
   3  -6   2    6.92    0.47 
  -3  -6  -2    7.44    0.48 
   3  -6   2    7.67    0.34 
  -3  -6  -2    7.73    0.30 
  -3  -6  -2    7.56    0.32 
  -3  -6  -2    7.89    0.32 
   3   6   2    7.80    0.30 
   3   6   2    7.86    0.33 
  -3   6  -2    7.60    0.51 
  -3   6  -2    7.75    0.37 
  -3   6  -2    7.92    0.43 
   3   6   2    8.36    0.49 
   4  -6   2    4.69    0.30 
  -4  -6  -2    4.45    0.32 
  -4  -6  -2    4.03    0.27 
  -4  -6  -2    5.02    0.44 
   4  -6   2    4.51    0.44 
  -4  -6  -2    4.47    0.28 
   4   6   2    4.41    0.27 
  -4   6  -2    4.50    0.34 
   4   6   2    4.14    0.41 
  -4   6  -2    4.60    0.35 
   4   6   2    4.14    0.28 
  -4   6  -2    4.71    0.45 
  -5  -6  -2   11.13    0.62 
  -5  -6  -2   11.39    0.45 
   5  -6   2   11.79    0.47 
  -5  -6  -2   11.49    0.53 
  -5  -6  -2   11.15    0.44 
  -5   6  -2   11.73    0.50 
  -5   6  -2   11.91    0.53 
   5   6   2   11.00    0.45 
   5   6   2   11.12    0.56 
  -5   6  -2   11.90    0.70 
  -5   6  -2   11.31    0.50 
   5   6   2   11.12    0.44 
   6  -6   2    3.53    0.50 
  -6  -6  -2    3.23    0.32 
   6  -6   2    3.72    0.34 
  -6  -6  -2    3.29    0.27 
   6   6   2    3.63    0.34 
   6   6   2    3.17    0.33 
  -6   6  -2    3.37    0.34 
   6   6   2    4.10    0.44 
   6   6   2    3.17    0.30 
  -7  -6  -2    9.40    0.71 
  -7  -6  -2    8.61    0.47 
   7  -6   2    8.39    0.84 
   7  -6   2    8.07    0.49 
  -7   6  -2    8.38    0.54 
   7   6   2    8.33    0.53 
   7   6   2    9.03    0.73 
   7   6   2    7.62    0.59 
   7   6   2    8.24    0.46 
  -7   6  -2    8.00    0.86 
   8  -6   2    3.02    0.56 
  -8  -6  -2    2.72    0.34 
   8  -6   2    2.51    0.34 
   8   6   2    2.69    0.50 
   8   6   2    2.48    0.32 
  -8   6  -2    3.09    0.66 
  -8   6  -2    2.77    0.42 
   8   6   2    2.93    0.51 
   8  -7  -2    0.11    0.37 
  -8  -7   2   -0.18    0.44 
  -8   7   2   -0.20    0.59 
   8   7  -2   -0.94    0.41 
   8   7  -2    0.11    0.37 
   8   7  -2   -0.45    0.45 
   8   7  -2   -0.52    0.45 
  -8   7   2    0.11    0.30 
  -7  -7   2    0.23    0.50 
  -7  -7   2   -0.24    0.40 
  -7  -7   2    0.07    0.29 
   7  -7  -2   -0.05    0.25 
  -7  -7   2   -0.05    0.21 
   7  -7  -2    0.35    0.53 
  -7   7   2   -0.27    0.41 
  -7   7   2    0.25    0.30 
   7   7  -2    0.56    0.49 
   7   7  -2   -0.59    0.34 
  -7   7   2    0.42    0.54 
  -7   7   2    0.26    0.17 
   7   7  -2    0.33    0.29 
   7   7  -2    0.40    0.34 
  -6  -7   2   -0.07    0.17 
  -6  -7   2    0.07    0.22 
  -6  -7   2    0.28    0.42 
   6  -7  -2   -0.02    0.44 
  -6  -7   2    0.11    0.30 
   6  -7  -2    0.09    0.21 
  -6   7   2    0.02    0.32 
   6   7  -2    0.33    0.33 
   6   7  -2   -0.01    0.23 
  -6   7   2    0.25    0.20 
   6   7  -2    0.65    0.32 
   6   7  -2   -0.14    0.26 
  -6   7   2    0.48    0.41 
   5  -7  -2   -0.11    0.18 
   5  -7  -2   -0.52    0.33 
  -5  -7   2    0.12    0.36 
  -5  -7   2    0.04    0.13 
  -5   7   2   -0.18    0.19 
  -5   7   2   -0.28    0.23 
   5   7  -2   -0.15    0.27 
   5   7  -2   -0.03    0.20 
   5   7  -2    0.15    0.28 
   5   7  -2    0.07    0.20 
  -4  -7   2    4.82    0.46 
  -4  -7   2    4.95    0.34 
   4  -7  -2    5.46    0.35 
   4  -7  -2    4.83    0.53 
  -4  -7   2    5.35    0.37 
  -4  -7   2    5.00    0.26 
   4   7  -2    5.48    0.48 
   4   7  -2    5.36    0.32 
   4   7  -2    5.32    0.34 
  -4   7   2    5.50    0.43 
  -4   7   2    5.17    0.40 
   4   7  -2    5.19    0.50 
  -3  -7   2    1.63    0.33 
  -3  -7   2    1.31    0.19 
   3  -7  -2    1.46    0.20 
  -3  -7   2    1.27    0.18 
   3  -7  -2    1.48    0.30 
   3   7  -2    1.23    0.19 
   3   7  -2    1.27    0.26 
  -3   7   2    1.43    0.22 
   3   7  -2    1.30    0.16 
   3   7  -2    1.57    0.30 
  -3   7   2    1.50    0.24 
  -3   7   2    1.65    0.34 
  -2  -7   2    2.97    0.24 
   2  -7  -2    3.29    0.26 
  -2  -7   2    3.59    0.41 
  -2  -7   2    3.35    0.24 
   2  -7  -2    3.11    0.36 
   2   7  -2    3.28    0.37 
  -2   7   2    3.18    0.31 
  -2   7   2    2.82    0.38 
   2   7  -2    2.88    0.32 
  -2   7   2    3.40    0.30 
   2   7  -2    2.88    0.26 
   2   7  -2    2.79    0.20 
  -1  -7   2   34.70    1.15 
  -1  -7   2   35.20    0.87 
   1  -7  -2   35.09    0.95 
   1  -7  -2   33.82    0.85 
   1  -7  -2   34.82    1.16 
  -1  -7   2   34.50    0.95 
  -1   7   2   32.38    1.13 
  -1   7   2   33.74    0.96 
   1   7  -2   33.44    1.07 
  -1   7   2   35.06    1.07 
   1   7  -2   35.18    1.14 
   1   7  -2   34.28    0.95 
   0  -7   2   10.45    0.40 
   0  -7  -2   10.45    0.33 
   0  -7  -2   10.41    0.40 
   0  -7   2   10.20    0.58 
   0  -7  -2   10.39    0.58 
   0  -7   2   10.13    0.34 
   0   7   2   10.17    0.41 
   0   7  -2   10.03    0.42 
   0   7  -2   10.59    0.58 
   0   7  -2   10.09    0.49 
   0   7   2   10.83    0.58 
  -1  -7  -2    0.79    0.14 
  -1  -7  -2    1.25    0.27 
   1  -7   2    0.92    0.11 
  -1  -7  -2    1.17    0.13 
   1  -7   2    0.89    0.24 
   1  -7   2    0.88    0.15 
   1   7   2    1.01    0.25 
   1   7   2    0.80    0.15 
  -1   7  -2    0.85    0.16 
  -1   7  -2    0.57    0.23 
  -1   7  -2    1.04    0.21 
  -2  -7  -2    0.83    0.14 
  -2  -7  -2    0.71    0.26 
   2  -7   2    0.93    0.16 
  -2  -7  -2    1.14    0.15 
   2  -7   2    0.56    0.21 
   2   7   2    0.71    0.11 
  -2   7  -2    0.60    0.27 
   2   7   2    0.73    0.16 
   2   7   2    0.84    0.25 
  -2   7  -2    0.96    0.22 
  -2   7  -2    1.04    0.19 
  -3  -7  -2    4.95    0.50 
  -3  -7  -2    4.62    0.29 
   3  -7   2    4.42    0.45 
   3  -7   2    4.24    0.30 
  -3  -7  -2    4.84    0.29 
   3   7   2    4.45    0.31 
  -3   7  -2    4.28    0.43 
   3   7   2    3.76    0.41 
   3   7   2    4.87    0.26 
  -3   7  -2    4.73    0.35 
  -3   7  -2    4.51    0.39 
  -4  -7  -2    3.68    0.42 
   4  -7   2    4.43    0.32 
  -4  -7  -2    4.38    0.35 
  -4  -7  -2    3.21    0.34 
  -4  -7  -2    3.59    0.30 
   4   7   2    4.95    0.31 
   4   7   2    4.26    0.32 
   4   7   2    3.64    0.39 
  -4   7  -2    4.31    0.39 
  -4   7  -2    4.21    0.40 
  -4   7  -2    4.58    0.49 
  -5  -7  -2    4.15    0.34 
  -5  -7  -2    4.74    0.34 
   5  -7   2    4.81    0.36 
  -5  -7  -2    4.46    0.36 
   5  -7   2    3.01    0.42 
   5   7   2    4.41    0.36 
  -5   7  -2    4.51    0.47 
  -5   7  -2    5.65    0.44 
   5   7   2    5.11    0.45 
   5   7   2    5.37    0.56 
   5   7   2    5.32    0.37 
  -6  -7  -2    0.40    0.21 
  -6  -7  -2    0.07    0.33 
  -6  -7  -2    0.00    0.36 
   6  -7   2    0.48    0.40 
   6  -7   2    0.44    0.21 
  -6  -7  -2    0.94    0.23 
   6   7   2    0.42    0.27 
   6   7   2    0.21    0.21 
  -6   7  -2    0.18    0.22 
  -6   7  -2   -0.03    0.29 
  -6   7  -2    1.10    0.45 
  -6   7  -2    0.27    0.27 
   6   7   2    0.08    0.28 
   6   7   2    0.10    0.34 
  -7  -7  -2    3.68    0.53 
   7  -7   2    3.13    0.35 
  -7  -7  -2    3.56    0.36 
  -7  -7  -2    2.94    0.31 
   7  -7   2    3.98    0.64 
  -7   7  -2    3.39    0.64 
   7   7   2    3.74    0.53 
   7   7   2    2.96    0.38 
  -7   7  -2    2.98    0.42 
   7   7   2    3.07    0.33 
   7   7   2    3.47    0.41 
  -7  -8   2    0.96    0.52 
  -7  -8   2   -0.40    0.59 
   7  -8  -2    0.00    0.65 
   7  -8  -2    0.19    0.33 
  -7  -8   2   -0.10    0.23 
  -7  -8   2    0.79    0.36 
  -7   8   2   -0.06    0.28 
  -7   8   2    0.04    0.48 
   7   8  -2   -0.04    0.33 
   7   8  -2    0.93    0.52 
  -7   8   2    0.24    0.65 
  -7   8   2    0.51    0.27 
   7   8  -2   -0.53    0.42 
   7   8  -2    0.21    0.38 
  -6  -8   2    0.49    0.36 
  -6  -8   2   -0.30    0.47 
   6  -8  -2    0.57    0.28 
   6  -8  -2    0.95    0.56 
  -6  -8   2    0.21    0.28 
  -6  -8   2    0.67    0.21 
   6   8  -2    0.46    0.40 
  -6   8   2    0.50    0.55 
   6   8  -2    0.49    0.37 
   6   8  -2    0.64    0.28 
   6   8  -2    0.65    0.29 
  -6   8   2    0.84    0.40 
  -6   8   2   -0.18    0.26 
   5  -8  -2    0.62    0.24 
  -5  -8   2    0.40    0.41 
   5  -8  -2    0.21    0.43 
  -5  -8   2    0.56    0.18 
  -5  -8   2    0.49    0.28 
  -5  -8   2    0.15    0.20 
   5   8  -2    0.42    0.24 
   5   8  -2    0.51    0.23 
   5   8  -2    0.52    0.35 
  -5   8   2    0.15    0.27 
   5   8  -2    0.68    0.36 
  -5   8   2    0.51    0.31 
  -5   8   2    0.43    0.47 
   4  -8  -2    0.55    0.29 
  -4  -8   2    0.89    0.38 
   4  -8  -2    0.77    0.21 
  -4  -8   2    0.43    0.17 
  -4   8   2    0.77    0.28 
   4   8  -2    0.71    0.21 
   4   8  -2    0.60    0.20 
   4   8  -2    0.77    0.35 
  -4   8   2    0.80    0.26 
   4   8  -2    1.02    0.33 
   3  -8  -2    9.20    0.69 
  -3  -8   2   10.82    0.45 
  -3  -8   2   10.03    0.72 
   3  -8  -2   11.09    0.48 
   3   8  -2   10.80    0.40 
  -3   8   2   10.38    0.57 
   3   8  -2    9.42    0.54 
  -3   8   2   10.34    0.71 
   3   8  -2    9.70    0.66 
  -3   8   2   10.19    0.52 
   3   8  -2    9.38    0.91 
  -2  -8   2    5.75    0.54 
   2  -8  -2    5.56    0.52 
   2  -8  -2    5.84    0.35 
  -2  -8   2    5.54    0.31 
  -2  -8   2    5.13    0.32 
   2   8  -2    6.25    0.48 
   2   8  -2    5.81    0.28 
  -2   8   2    5.46    0.39 
  -2   8   2    5.28    0.57 
   2   8  -2    5.92    0.55 
  -2   8   2    5.19    0.46 
   2   8  -2    5.70    0.37 
  -1  -8   2    4.97    0.31 
  -1  -8   2    5.04    0.48 
   1  -8  -2    4.74    0.24 
   1  -8  -2    4.30    0.30 
  -1  -8   2    5.03    0.28 
   1  -8  -2    4.22    0.46 
   1   8  -2    4.86    0.43 
  -1   8   2    4.27    0.34 
   1   8  -2    4.90    0.51 
  -1   8   2    3.89    0.42 
   1   8  -2    4.42    0.32 
  -1   8   2    4.41    0.48 
   0  -8   2    1.44    0.20 
   0  -8   2    1.28    0.15 
   0  -8   2    1.43    0.29 
   0  -8  -2    1.54    0.31 
   0  -8  -2    1.50    0.20 
   0  -8  -2    1.38    0.15 
   0   8   2    1.80    0.31 
   0   8  -2    1.31    0.25 
   0   8   2    1.03    0.30 
   0   8  -2    1.13    0.29 
   0   8  -2    1.45    0.21 
   0   8   2    1.22    0.20 
   1  -8   2    3.45    0.23 
   1  -8   2    3.54    0.29 
  -1  -8  -2    3.25    0.40 
  -1  -8  -2    3.17    0.27 
  -1  -8  -2    3.45    0.24 
   1  -8   2    2.99    0.39 
   1   8   2    3.11    0.43 
  -1   8  -2    3.14    0.40 
   1   8   2    3.21    0.30 
  -1   8  -2    3.07    0.34 
  -1   8  -2    3.41    0.32 
   1   8   2    2.57    0.33 
   2  -8   2   33.62    1.19 
   2  -8   2   33.10    0.95 
  -2  -8  -2   34.42    1.18 
  -2  -8  -2   33.18    0.87 
   2   8   2   31.57    0.94 
  -2   8  -2   32.83    0.97 
   2   8   2   32.88    1.17 
   2   8   2   32.09    0.84 
   2   8   2   31.55    1.10 
  -2   8  -2   32.20    1.07 
   3  -8   2    6.26    0.38 
  -3  -8  -2    5.96    0.61 
  -3  -8  -2    6.54    0.36 
  -3  -8  -2    6.47    0.37 
   3  -8   2    6.62    0.69 
  -3   8  -2    6.69    0.44 
   3   8   2    6.25    0.32 
   3   8   2    6.00    0.58 
  -3   8  -2    7.00    0.50 
   3   8   2    5.90    0.55 
  -4  -8  -2    0.50    0.22 
  -4  -8  -2    0.30    0.17 
  -4  -8  -2    0.51    0.33 
   4  -8   2   -0.37    0.26 
   4  -8   2    0.60    0.20 
  -4   8  -2    0.72    0.27 
  -4   8  -2    0.67    0.27 
   4   8   2    0.86    0.32 
   4   8   2    0.57    0.32 
   4   8   2    0.60    0.20 
   5  -8   2    2.99    0.31 
  -5  -8  -2    2.71    0.34 
  -5  -8  -2    3.28    0.28 
  -5  -8  -2    3.68    0.36 
   5  -8   2    2.80    0.43 
   5   8   2    3.87    0.40 
  -5   8  -2    4.03    0.52 
   5   8   2    3.67    0.30 
  -5   8  -2    3.33    0.39 
   5   8   2    3.77    0.44 
   5   8   2    3.94    0.51 
  -5   8  -2    3.48    0.41 
  -6  -8  -2    2.68    0.29 
  -6  -8  -2    2.46    0.31 
   6  -8   2    2.47    0.32 
  -6  -8  -2    2.77    0.42 
   6  -8   2    1.68    0.58 
   6   8   2    2.83    0.49 
  -6   8  -2    1.40    0.31 
   6   8   2    2.65    0.42 
  -6   8  -2    2.34    0.60 
   6   8   2    2.65    0.33 
   6   8   2    2.50    0.34 
   7  -8   2    1.31    0.35 
  -7  -8  -2    1.65    0.35 
   7  -8   2    0.81    0.74 
  -7  -8  -2   -0.61    0.51 
  -7  -8  -2    1.14    0.30 
  -7  -8  -2    0.51    0.52 
   7   8   2    0.70    0.44 
  -7   8  -2    1.69    0.38 
   7   8   2    1.24    0.34 
   7   8   2    1.52    0.41 
  -7   8  -2    0.46    0.32 
  -7   8  -2   -0.59    0.46 
  -7   8  -2    0.71    0.68 
   7   8   2    1.80    0.55 
   7  -9  -2    0.04    0.79 
  -7  -9   2   -0.59    0.74 
   7  -9  -2    0.12    0.42 
  -7  -9   2   -0.35    0.27 
  -7   9   2   -0.35    0.56 
   7   9  -2    0.35    0.44 
   7   9  -2    0.41    0.42 
  -7   9   2   -0.20    0.30 
   7   9  -2    0.80    0.63 
   7   9  -2   -0.22    0.56 
   6  -9  -2    0.10    0.34 
  -6  -9   2    0.31    0.34 
  -6  -9   2    0.28    0.44 
  -6  -9   2    0.29    0.22 
  -6  -9   2    0.39    0.56 
   6  -9  -2    0.56    0.65 
  -6   9   2    0.34    0.46 
  -6   9   2    1.09    0.66 
   6   9  -2    0.49    0.33 
  -6   9   2    0.73    0.35 
   6   9  -2   -0.54    0.47 
   6   9  -2    0.53    0.35 
   6   9  -2   -0.40    0.45 
  -5  -9   2    1.03    0.22 
   5  -9  -2    1.51    0.54 
  -5  -9   2    1.52    0.31 
  -5  -9   2    1.59    0.56 
  -5  -9   2    1.50    0.35 
   5   9  -2    0.87    0.26 
  -5   9   2    0.60    0.50 
   5   9  -2    1.36    0.31 
  -5   9   2    1.66    0.40 
   5   9  -2    0.52    0.45 
   5   9  -2    1.33    0.42 
  -5   9   2    1.32    0.35 
   4  -9  -2    0.79    0.35 
  -4  -9   2   -0.11    0.25 
  -4  -9   2   -0.07    0.19 
   4  -9  -2    0.27    0.26 
  -4  -9   2   -0.04    0.17 
  -4  -9   2   -0.25    0.39 
  -4   9   2   -0.10    0.29 
   4   9  -2   -0.04    0.20 
  -4   9   2    0.59    0.30 
   4   9  -2   -0.02    0.32 
   4   9  -2   -0.05    0.39 
   4   9  -2    0.02    0.23 
   3  -9  -2   -0.12    0.21 
   3  -9  -2   -0.02    0.30 
  -3  -9   2    0.19    0.38 
   3   9  -2    0.38    0.29 
  -3   9   2    0.01    0.31 
   3   9  -2    0.03    0.35 
   3   9  -2   -0.18    0.15 
  -3   9   2    0.19    0.25 
  -3   9   2    0.29    0.37 
   3   9  -2    0.17    0.21 
  -2  -9   2    5.43    0.37 
   2  -9  -2    6.12    0.46 
  -2  -9   2    5.42    0.54 
   2  -9  -2    5.83    0.31 
  -2   9   2    6.31    0.62 
   2   9  -2    6.70    0.54 
   2   9  -2    5.29    0.39 
  -2   9   2    5.74    0.47 
   2   9  -2    6.51    0.65 
  -1  -9   2   18.04    0.66 
   1  -9  -2   18.68    0.61 
   1  -9  -2   20.30    0.96 
  -1  -9   2   18.93    0.95 
  -1  -9   2   20.16    0.60 
   1   9  -2   19.79    0.95 
   1   9  -2   19.48    0.70 
  -1   9   2   19.55    0.71 
  -1   9   2   18.29    0.82 
  -1   9   2   15.84    1.01 
   0  -9   2    4.33    0.38 
   0  -9   2    3.69    0.28 
   0  -9   2    4.00    0.53 
   0  -9  -2    4.67    0.32 
   0  -9  -2    3.16    0.26 
   0  -9  -2    5.34    0.56 
   0   9   2    3.53    0.35 
   0   9   2    4.12    0.44 
   0   9  -2    4.39    0.50 
   0   9   2    3.81    0.49 
   0   9  -2    4.50    0.47 
   0   9  -2    4.13    0.38 
  -1  -9  -2    7.66    0.42 
   1  -9   2    7.92    0.36 
   1  -9   2    8.32    0.44 
  -1  -9  -2    7.67    0.67 
   1  -9   2    7.82    0.69 
  -1   9  -2    7.58    0.47 
  -1   9  -2    7.71    0.65 
  -1   9  -2    8.23    0.57 
   1   9   2    8.73    0.68 
  -2  -9  -2    0.08    0.17 
   2  -9   2   -0.02    0.19 
   2  -9   2    0.06    0.29 
  -2  -9  -2    0.10    0.32 
   2   9   2   -0.42    0.22 
   2   9   2    0.16    0.19 
  -2   9  -2    0.01    0.21 
   2   9   2    0.52    0.36 
  -2   9  -2    0.06    0.26 
  -3  -9  -2    2.17    0.43 
  -3  -9  -2    1.76    0.25 
   3  -9   2    2.25    0.39 
   3  -9   2    2.19    0.28 
   3   9   2    1.70    0.20 
  -3   9  -2    2.22    0.38 
  -3   9  -2    1.74    0.32 
   3   9   2    1.62    0.25 
   3   9   2    1.72    0.35 
   3   9   2    1.82    0.40 
   4  -9   2   -0.16    0.34 
  -4  -9  -2    0.50    0.22 
   4  -9   2    0.60    0.26 
  -4  -9  -2    0.58    0.21 
  -4  -9  -2    0.74    0.39 
  -4  -9  -2    0.36    0.43 
   4   9   2    0.65    0.21 
  -4   9  -2    0.32    0.31 
  -4   9  -2   -0.27    0.46 
   4   9   2    0.91    0.38 
   4   9   2    0.51    0.24 
  -4   9  -2    0.51    0.29 
   4   9   2   -0.42    0.38 
  -5  -9  -2   -0.02    0.22 
  -5  -9  -2   -0.40    0.42 
  -5  -9  -2    0.22    0.25 
   5  -9   2    0.90    0.40 
  -5  -9  -2    0.23    0.33 
   5  -9   2    0.11    0.25 
   5   9   2    0.12    0.25 
  -5   9  -2    0.87    0.43 
  -5   9  -2    0.14    0.53 
   5   9   2    0.05    0.40 
   5   9   2    0.12    0.27 
  -5   9  -2   -0.07    0.36 
   5   9   2   -0.26    0.40 
   6  -9   2    0.03    0.61 
  -6  -9  -2    0.34    0.53 
  -6  -9  -2    0.49    0.44 
   6  -9   2    0.87    0.35 
  -6  -9  -2    1.21    0.34 
  -6  -9  -2    0.98    0.28 
  -6   9  -2    0.56    0.30 
   6   9   2    1.03    0.34 
   6   9   2    0.92    0.37 
   6   9   2    0.88    0.46 
  -6   9  -2    0.02    0.42 
   6   9   2    0.75    0.56 
  -6   9  -2   -0.91    0.65 
   6 -10  -2   -0.63    0.42 
  -6 -10   2   -0.39    0.25 
   6 -10  -2    0.92    0.75 
  -6 -10   2    0.37    0.74 
  -6  10   2    0.24    0.55 
   6  10  -2   -0.04    0.41 
  -6  10   2    0.86    0.48 
   6  10  -2    0.00    0.39 
   6  10  -2    0.04    0.60 
   6  10  -2   -0.60    0.58 
  -5 -10   2    0.32    0.38 
   5 -10  -2    0.58    0.35 
  -5 -10   2    0.36    0.24 
  -5 -10   2    0.46    0.34 
   5 -10  -2    1.10    0.57 
  -5 -10   2    0.12    0.61 
   5  10  -2    0.70    0.50 
   5  10  -2   -0.10    0.53 
   5  10  -2    0.34    0.35 
  -5  10   2    0.67    0.42 
  -5  10   2    0.69    0.46 
   5  10  -2    0.55    0.31 
  -5  10   2    1.00    0.69 
   4 -10  -2   -0.11    0.27 
  -4 -10   2    0.35    0.26 
  -4 -10   2    0.50    0.50 
  -4 -10   2    0.22    0.30 
   4 -10  -2    0.20    0.38 
   4  10  -2    0.91    0.44 
   4  10  -2   -0.03    0.27 
  -4  10   2   -1.19    0.53 
   4  10  -2   -0.63    0.46 
   4  10  -2    0.21    0.23 
  -4  10   2    0.20    0.36 
  -3 -10   2    0.73    0.28 
   3 -10  -2    0.41    0.38 
   3 -10  -2    0.10    0.23 
  -3 -10   2    0.47    0.45 
  -3 -10   2    0.30    0.24 
   3  10  -2    0.98    0.39 
   3  10  -2    0.57    0.20 
  -3  10   2    0.04    0.49 
  -3  10   2    0.74    0.35 
   3  10  -2    0.45    0.27 
  -2 -10   2   16.90    1.02 
  -2 -10   2   16.10    0.61 
   2 -10  -2   16.64    0.93 
  -2 -10   2   14.92    0.66 
   2 -10  -2   16.04    0.67 
  -2  10   2   17.38    0.75 
  -2  10   2   15.79    1.02 
   2  10  -2   16.67    0.69 
   2  10  -2   18.79    1.03 
   2  10  -2   17.10    0.85 
  -1 -10   2    1.29    0.25 
  -1 -10   2    1.73    0.80 
   1 -10  -2    1.53    0.27 
   1 -10  -2    0.85    0.39 
  -1  10   2    1.51    0.52 
   1  10  -2    1.55    0.46 
   1  10  -2    1.61    0.31 
  -1  10   2    1.68    0.29 
   0 -10  -2    1.08    0.24 
   0 -10  -2    0.87    0.39 
   0 -10   2    1.49    0.45 
   0 -10   2    1.24    0.25 
   0  10  -2    1.20    0.44 
   0  10  -2    0.98    0.27 
   0  10   2    0.34    0.42 
   0  10   2    1.12    0.27 
   1 -10   2   12.62    0.52 
  -1 -10  -2   17.46    0.96 
   1 -10   2   15.15    0.93 
   1 -10   2   16.22    0.66 
   1  10   2   15.61    0.65 
   1  10   2   16.48    0.95 
  -1  10  -2   15.94    0.96 
  -1  10  -2   13.76    0.76 
   2 -10   2    0.14    0.23 
  -2 -10  -2   -0.49    0.38 
   2 -10   2    0.24    0.36 
   2 -10   2    0.13    0.19 
  -2  10  -2   -0.35    0.39 
   2  10   2   -0.02    0.21 
   2  10   2   -0.04    0.41 
   2  10   2   -0.31    0.30 
  -2  10  -2   -0.08    0.26 
  -3 -10  -2    4.50    0.60 
  -3 -10  -2    4.48    0.37 
   3 -10   2    4.40    0.58 
   3 -10   2    4.30    0.30 
   3 -10   2    4.02    0.39 
  -3 -10  -2    4.50    0.42 
   3  10   2    3.57    0.56 
   3  10   2    4.40    0.45 
   3  10   2    4.73    0.56 
   3  10   2    3.64    0.27 
  -3  10  -2    4.02    0.43 
  -3  10  -2    4.44    0.64 
   4 -10   2    0.92    0.42 
  -4 -10  -2    1.36    0.29 
   4 -10   2    1.32    0.31 
  -4 -10  -2    1.01    0.32 
  -4 -10  -2    1.21    0.26 
  -4 -10  -2    1.15    0.54 
  -4  10  -2    0.88    0.51 
   4  10   2    1.34    0.31 
  -4  10  -2    1.35    0.40 
   4  10   2    0.52    0.48 
   4  10   2    1.16    0.25 
   4  10   2    0.85    0.46 
  -5 -10  -2    0.36    0.26 
  -5 -10  -2    1.24    0.42 
  -5 -10  -2    0.93    0.33 
   5 -10   2    0.65    0.48 
  -5 -10  -2    0.10    0.58 
   5 -10   2    1.29    0.37 
  -5  10  -2    0.20    0.57 
   5  10   2    1.20    0.59 
   5  10   2    1.64    0.54 
   5  10   2    0.55    0.32 
   5  10   2    0.79    0.33 
  -5  10  -2    0.18    0.43 
  -6 -10  -2    2.24    0.45 
  -6 -10  -2    2.70    0.36 
   6 -10   2    3.29    0.47 
  -6 -10  -2    3.04    0.58 
   6 -10   2    1.91    0.86 
   6  10   2    3.43    0.46 
   6  10   2    4.55    0.72 
   6  10   2    3.50    0.72 
  -6  10  -2    3.02    0.43 
   6  10   2    4.18    0.46 
  -5 -11   2   -0.34    0.90 
  -5 -11   2    0.01    0.27 
   5 -11  -2    0.01    0.41 
  -5 -11   2   -0.29    0.79 
   5  11  -2    0.21    0.36 
   5  11  -2   -0.33    0.68 
  -5  11   2    0.64    0.51 
   5  11  -2   -0.17    0.60 
   5  11  -2    0.18    0.40 
  -5  11   2    0.56    0.54 
  -4 -11   2    0.98    0.34 
   4 -11  -2    1.09    0.54 
  -4 -11   2    0.55    0.42 
  -4 -11   2    0.27    0.65 
   4 -11  -2    0.54    0.36 
   4  11  -2    1.01    0.52 
   4  11  -2    0.02    0.36 
  -4  11   2    0.93    0.47 
  -4  11   2    0.55    0.46 
   4  11  -2    0.36    0.60 
   4  11  -2    0.50    0.29 
  -4  11   2    0.49    0.69 
  -3 -11   2   -0.02    0.28 
  -3 -11   2   -0.07    0.33 
  -3 -11   2    0.60    0.57 
   3 -11  -2    0.10    0.49 
   3 -11  -2   -0.12    0.24 
   3 -11  -2   -0.28    0.30 
   3  11  -2    0.24    0.43 
  -3  11   2   -0.12    0.39 
  -3  11   2    0.38    0.60 
  -3  11   2    0.29    0.44 
   3  11  -2    0.25    0.32 
   3  11  -2   -1.27    0.47 
  -2 -11   2   -0.21    0.55 
  -2 -11   2    0.15    0.28 
  -2 -11   2    0.08    0.24 
   2 -11  -2    0.39    0.22 
   2 -11  -2   -0.44    0.28 
   2 -11  -2   -0.72    0.39 
  -2  11   2   -0.26    0.33 
   2  11  -2    0.07    0.30 
  -2  11   2   -0.26    0.57 
   2  11  -2   -0.01    0.44 
  -2  11   2   -0.12    0.40 
   2  11  -2    0.53    0.41 
  -1 -11   2    2.36    0.56 
  -1 -11   2    2.69    0.35 
   1 -11  -2    2.80    0.36 
   1 -11  -2    3.37    0.30 
  -1 -11   2    2.91    0.32 
   1 -11  -2    4.28    0.62 
  -1  11   2    2.62    0.57 
   1  11  -2    2.89    0.61 
   1  11  -2    3.21    0.40 
   1  11  -2    3.31    0.48 
  -1  11   2    3.05    0.49 
  -1  11   2    3.08    0.42 
   0 -11  -2    8.02    0.46 
   0 -11   2    7.76    0.78 
   0 -11   2    6.96    0.53 
   0 -11  -2    7.73    0.52 
   0 -11   2    8.11    0.47 
   0 -11  -2    6.65    0.71 
   0  11  -2    7.89    0.58 
   0  11  -2    6.86    0.75 
   0  11  -2    7.66    0.68 
   0  11   2    8.28    0.90 
   0  11   2    7.31    0.60 
   0  11   2    8.85    0.75 
  -1 -11  -2    1.79    0.52 
   1 -11   2    1.13    0.47 
   1 -11   2    0.76    0.24 
   1 -11   2    1.27    0.31 
  -1 -11  -2    0.26    0.25 
  -1 -11  -2    0.87    0.27 
   1  11   2    0.72    0.41 
  -1  11  -2    1.89    0.48 
  -1  11  -2    0.90    0.33 
   1  11   2    0.89    0.29 
  -1  11  -2    0.94    0.55 
   1  11   2    0.98    0.52 
   2 -11   2    0.03    0.22 
   2 -11   2    0.24    0.49 
  -2 -11  -2   -0.01    0.61 
  -2 -11  -2   -0.18    0.26 
  -2 -11  -2   -0.16    0.23 
   2 -11   2    0.17    0.28 
  -2  11  -2    0.10    0.48 
   2  11   2   -0.25    0.28 
   2  11   2   -0.46    0.41 
   2  11   2    0.08    0.55 
  -2  11  -2   -0.07    0.34 
  -2  11  -2    0.63    0.42 
   3 -11   2    5.57    0.57 
  -3 -11  -2    5.40    0.52 
  -3 -11  -2    5.27    0.75 
   3 -11   2    5.19    0.43 
  -3 -11  -2    4.94    0.42 
   3 -11   2    4.30    0.62 
   3  11   2    3.72    0.76 
   3  11   2    4.49    0.45 
  -3  11  -2    5.72    0.54 
   3  11   2    5.26    0.64 
  -3  11  -2    5.57    0.63 
  -3  11  -2    3.76    0.68 
   4 -11   2    0.32    0.37 
   4 -11   2    0.40    0.52 
  -4 -11  -2   -0.56    0.60 
   4 -11   2    1.08    0.28 
  -4 -11  -2    0.69    0.35 
  -4 -11  -2    0.75    0.39 
  -4 -11  -2    0.48    0.27 
  -4  11  -2    0.31    0.47 
   4  11   2    0.78    0.38 
   4  11   2   -0.10    0.57 
  -4  11  -2   -0.35    0.59 
   4  11   2    0.62    0.28 
  -4  11  -2    1.47    0.50 
   4  11   2    1.03    0.56 
  -5 -11  -2    0.92    0.51 
   5 -11   2    1.61    0.63 
  -5 -11  -2   -1.33    0.70 
   5 -11   2    1.27    0.45 
  -5 -11  -2    0.84    0.31 
  -5  11  -2    1.07    0.57 
  -5  11  -2    1.44    0.55 
   5  11   2    1.58    0.70 
   5  11   2    1.11    0.44 
   5  11   2    2.61    0.77 
   5  11   2    1.21    0.37 
   4 -12  -2    0.96    0.48 
  -4 -12   2   -0.64    0.85 
   4 -12  -2    1.29    0.67 
   4  12  -2    1.05    0.77 
   4  12  -2   -0.16    0.47 
  -4  12   2    0.72    0.59 
  -4  12   2    0.97    0.67 
  -3 -12   2   -0.19    0.74 
  -3 -12   2    0.84    0.43 
   3 -12  -2   -0.01    0.40 
  -3 -12   2    0.56    0.37 
   3 -12  -2    0.47    0.30 
   3 -12  -2   -0.27    0.63 
   3  12  -2    0.35    0.39 
   3  12  -2    1.21    0.55 
  -3  12   2    0.56    0.55 
   3  12  -2   -0.73    0.66 
  -3  12   2   -0.32    0.49 
  -3  12   2   -0.29    0.72 
  -2 -12   2    0.35    0.66 
  -2 -12   2    0.25    0.35 
   2 -12  -2    0.52    0.30 
   2 -12  -2    0.61    0.40 
   2 -12  -2    0.91    0.60 
  -2 -12   2    0.66    0.37 
   2  12  -2   -0.24    0.38 
  -2  12   2   -0.41    0.62 
  -2  12   2    0.39    0.46 
  -2  12   2    1.35    0.53 
   2  12  -2    0.42    0.45 
   2  12  -2    0.24    0.71 
  -1 -12   2    0.24    0.32 
  -1 -12   2   -0.04    0.33 
   1 -12  -2   -0.24    0.35 
   1 -12  -2   -0.04    0.29 
   1 -12  -2   -1.30    0.54 
  -1 -12   2   -0.27    0.63 
  -1  12   2   -0.40    0.60 
   1  12  -2   -0.09    0.45 
   1  12  -2    0.47    0.62 
  -1  12   2    0.08    0.41 
   1  12  -2    0.17    0.35 
  -1  12   2    0.92    0.49 
   0 -12   2    1.92    0.69 
   0 -12  -2    1.41    0.35 
   0 -12   2    2.23    0.40 
   0 -12   2    1.52    0.33 
   0 -12  -2    1.68    0.63 
   0 -12  -2    1.50    0.33 
   0  12   2    2.33    0.67 
   0  12  -2    1.89    0.52 
   0  12   2    2.26    0.53 
   0  12  -2    1.54    0.70 
   0  12  -2    1.12    0.42 
   0  12   2    1.59    0.42 
   1 -12   2    0.18    0.35 
  -1 -12  -2    0.47    0.61 
  -1 -12  -2    0.12    0.32 
   1 -12   2    0.08    0.58 
   1 -12   2    0.01    0.30 
  -1 -12  -2    0.13    0.30 
   1  12   2    0.41    0.38 
  -1  12  -2    0.07    0.39 
   1  12   2    2.06    0.69 
  -1  12  -2    0.49    0.48 
  -1  12  -2    1.37    0.69 
   1  12   2    0.44    0.47 
  -2 -12  -2    0.59    0.36 
   2 -12   2    0.42    0.61 
  -2 -12  -2    0.96    0.67 
   2 -12   2    0.34    0.31 
  -2 -12  -2    0.21    0.33 
   2 -12   2    0.16    0.36 
  -2  12  -2    0.39    0.71 
  -2  12  -2    0.74    0.45 
   2  12   2    0.76    0.67 
  -2  12  -2    1.01    0.52 
   2  12   2    0.95    0.47 
   2  12   2    0.64    0.39 
  -3 -12  -2    2.94    0.80 
  -3 -12  -2    2.19    0.45 
   3 -12   2    2.70    0.47 
  -3 -12  -2    2.23    0.51 
   3 -12   2    2.82    0.67 
  -3  12  -2    3.16    0.59 
   3  12   2    4.33    0.82 
  -3  12  -2    3.41    0.67 
  -3  12  -2    1.71    0.82 
   3  12   2    1.99    0.45 
   3  12   2    3.70    0.66 
   4 -12   2    0.26    0.49 
   4 -12   2    0.20    0.67 
  -4 -12  -2    0.83    0.76 
  -4 -12  -2    0.19    0.52 
  -4 -12  -2    0.24    0.31 
  -4  12  -2    0.04    0.60 
  -4  12  -2   -0.12    0.57 
   4  12   2    0.05    0.75 
   4  12   2    0.21    0.45 
   3 -13  -2    1.79    0.60 
  -3  13   2    3.02    0.72 
  -3  13   2    3.48    0.98 
   3  13  -2    4.53    1.00 
  -2 -13   2    1.55    0.93 
   2 -13  -2    0.57    0.77 
   2 -13  -2    1.86    0.54 
  -2  13   2    0.16    0.74 
   2  13  -2    1.67    0.52 
   2  13  -2    0.75    0.84 
  -2  13   2    0.86    0.59 
   1 -13  -2    0.08    0.43 
   1 -13  -2    0.17    0.38 
  -1 -13   2   -0.56    0.75 
   1 -13  -2   -0.51    0.72 
  -1  13   2    0.39    0.76 
  -1  13   2    0.44    0.52 
   1  13  -2    1.16    0.84 
   1  13  -2   -0.04    0.50 
  -1  13   2    1.23    0.91 
   0 -13  -2   -0.08    0.58 
   0 -13  -2   -0.16    0.75 
   0 -13  -2    0.91    0.42 
   0 -13   2    0.46    0.47 
   0 -13   2   -0.27    0.75 
   0  13  -2    0.71    0.50 
   0  13   2    0.55    0.81 
   0  13   2    0.59    0.49 
   0  13  -2   -0.34    0.84 
  -1 -13  -2    1.21    0.81 
   1 -13   2    4.43    0.89 
  -1 -13  -2    2.52    0.48 
   1 -13   2    1.60    0.51 
   1  13   2    2.83    0.97 
  -1  13  -2    1.25    0.56 
  -1  13  -2    2.06    0.96 
   1  13   2    1.59    0.55 
   2 -13   2    0.43    0.76 
   2 -13   2   -0.40    0.47 
  -2 -13  -2   -0.27    0.53 
  -2 -13  -2    0.76    0.81 
  -2  13  -2   -0.22    0.55 
   2  13   2    0.28    0.48 
   2  13   2    0.37    0.82 
   9   0  -3    0.16    0.48 
  -9   0   3   -0.99    0.45 
   9   0  -3    0.49    0.35 
  -9   0   3    0.12    0.28 
  -9   0   3    1.32    0.51 
   9   0  -3    0.57    0.28 
   8   0  -3   -0.13    0.25 
   8   0  -3    0.09    0.21 
  -8   0   3    0.74    0.34 
   8   0  -3    0.01    0.31 
  -8   0   3   -0.03    0.33 
   7   0  -3    3.39    0.32 
  -7   0   3    3.02    0.39 
  -7   0   3    3.43    0.30 
   7   0  -3    3.38    0.36 
  -7   0   3    2.08    0.32 
   7   0  -3    3.84    0.32 
  -6   0   3    0.10    0.20 
   6   0  -3    0.09    0.14 
   6   0  -3   -0.10    0.16 
  -6   0   3    0.02    0.14 
   6   0  -3    0.02    0.13 
   6   0  -3    0.01    0.18 
  -6   0   3   -0.11    0.20 
  -5   0   3   33.15    0.92 
   5   0  -3   31.61    0.78 
  -5   0   3   30.35    0.84 
   5   0  -3   30.58    0.85 
   5   0  -3   30.85    0.85 
   5   0  -3   31.85    0.85 
  -5   0   3   30.31    0.99 
   4   0  -3   -0.02    0.08 
  -4   0   3   -0.01    0.12 
   4   0  -3   -0.04    0.09 
   4   0  -3    0.01    0.07 
   4   0  -3   -0.13    0.10 
  -4   0   3   -0.04    0.07 
  -4   0   3    0.08    0.11 
  -3   0   3    1.69    0.17 
   3   0  -3    1.39    0.09 
   3   0  -3    1.26    0.11 
  -3   0   3    1.44    0.17 
  -3   0   3    1.62    0.12 
   3   0  -3    1.50    0.14 
   3   0  -3    1.45    0.06 
   3   0  -3    1.44    0.14 
   2   0  -3   -0.03    0.05 
  -2   0   3    0.00    0.03 
   2   0  -3   -0.03    0.05 
  -2   0   3   -0.01    0.04 
  -2   0   3   -0.10    0.05 
  -2   0   3   -0.05    0.05 
   2   0  -3    0.01    0.05 
   2   0  -3    0.00    0.02 
  -1   0   3  528.79   11.86 
  -1   0   3  533.06   11.80 
  -1   0   3  510.96   11.70 
  -1   0   3  489.40   11.59 
   1   0  -3  494.05   11.70 
   1   0  -3  535.76   11.84 
   1   0  -3  517.52   11.62 
   1   0  -3  524.43   11.72 
   0   0  -3    0.00    0.02 
   0   0   3   -0.02    0.03 
   0   0   3   -0.01    0.02 
   0   0  -3   -0.01    0.03 
   0   0   3   -0.01    0.03 
   0   0   3    0.03    0.01 
   0   0   3    0.00    0.02 
   0   0  -3   -0.01    0.01 
   0   0   3    0.02    0.03 
   0   0  -3   -0.01    0.02 
   0   0  -3    0.09    0.02 
   1   0   3  196.46    4.42 
   1   0   3  203.01    4.54 
  -1   0  -3  193.85    4.42 
   1   0   3  198.37    4.43 
   1   0   3  199.47    4.43 
  -1   0  -3  181.58    4.42 
  -1   0  -3  201.06    4.43 
  -1   0  -3  203.25    4.47 
   1   0   3  198.46    4.43 
  -2   0  -3    0.00    0.04 
   2   0   3   -0.08    0.04 
  -2   0  -3    0.08    0.05 
   2   0   3   -0.03    0.04 
  -3   0  -3   77.06    1.82 
   3   0   3   74.93    1.82 
  -3   0  -3   79.51    1.77 
   3   0   3   79.02    1.77 
  -3   0  -3   78.21    1.78 
  -3   0  -3   79.18    1.85 
   3   0   3   79.75    1.82 
   3   0   3   79.28    1.84 
   3   0   3   79.97    1.77 
   4   0   3   -0.11    0.07 
   4   0   3   -0.03    0.12 
   4   0   3   -0.06    0.05 
  -4   0  -3   -0.05    0.06 
   4   0   3    0.15    0.11 
  -4   0  -3   -0.02    0.05 
   4   0   3    0.01    0.04 
  -4   0  -3   -0.10    0.08 
  -5   0  -3   17.29    0.47 
   5   0   3   17.25    0.45 
  -5   0  -3   17.45    0.48 
   5   0   3   17.62    0.44 
   5   0   3   17.15    0.54 
  -5   0  -3   15.57    0.54 
   5   0   3   16.92    0.50 
  -6   0  -3   -0.03    0.11 
  -6   0  -3   -0.07    0.11 
   6   0   3   -0.05    0.19 
   6   0   3   -0.10    0.08 
   6   0   3   -0.04    0.09 
   6   0   3    0.03    0.11 
  -6   0  -3   -0.26    0.10 
   7   0   3    1.32    0.28 
  -7   0  -3    1.03    0.21 
   7   0   3    1.59    0.17 
   7   0   3    1.74    0.15 
   8   0   3   -0.01    0.12 
   8   0   3    0.23    0.37 
   8   0   3    0.04    0.10 
  -8   0  -3   -0.38    0.23 
  -9   0  -3   -0.32    0.32 
   9   0   3   -0.08    0.52 
   9  -1  -3   -0.14    0.26 
  -9  -1   3    0.97    0.49 
   9  -1  -3    0.65    0.49 
  -9  -1   3    0.01    0.28 
  -9  -1   3    1.85    0.48 
   9  -1  -3    0.76    0.38 
   9   1  -3   -0.06    0.27 
   9   1  -3    0.05    0.33 
  -9   1   3    0.17    0.26 
  -9   1   3    0.24    0.47 
  -9   1   3   -0.32    0.49 
   9   1  -3    0.12    0.48 
   8  -1  -3    0.18    0.34 
   8  -1  -3    0.39    0.26 
  -8  -1   3   -0.58    0.36 
  -8  -1   3    0.43    0.36 
   8  -1  -3   -0.14    0.20 
  -8   1   3    0.91    0.38 
   8   1  -3    0.02    0.20 
   8   1  -3   -0.33    0.32 
  -8   1   3    0.46    0.36 
   8   1  -3    0.31    0.25 
   7  -1  -3    1.12    0.21 
   7  -1  -3    1.20    0.28 
  -7  -1   3    1.47    0.34 
  -7  -1   3    0.27    0.26 
  -7  -1   3    0.58    0.18 
   7   1  -3    0.92    0.24 
  -7   1   3    1.31    0.29 
   7   1  -3    0.87    0.27 
  -7   1   3    0.91    0.20 
  -7   1   3    0.54    0.29 
   7   1  -3    0.86    0.20 
   6  -1  -3   -0.02    0.15 
   6  -1  -3   -0.07    0.20 
   6  -1  -3    0.06    0.13 
  -6  -1   3   -0.04    0.12 
  -6  -1   3    0.04    0.22 
   6  -1  -3    0.25    0.19 
  -6  -1   3    0.02    0.19 
   6   1  -3    0.05    0.15 
   6   1  -3   -0.02    0.15 
   6   1  -3   -0.04    0.14 
  -6   1   3    0.15    0.21 
  -6   1   3    0.25    0.19 
  -6   1   3   -0.03    0.12 
   6   1  -3    0.00    0.18 
   5  -1  -3    0.15    0.13 
  -5  -1   3    0.24    0.15 
   5  -1  -3    0.11    0.10 
  -5  -1   3   -0.02    0.16 
  -5  -1   3    0.13    0.11 
   5  -1  -3    0.25    0.13 
   5  -1  -3    0.35    0.15 
   5   1  -3    0.17    0.10 
  -5   1   3    0.22    0.15 
  -5   1   3    0.64    0.21 
   5   1  -3    0.17    0.11 
   5   1  -3    0.11    0.12 
   5   1  -3    0.22    0.14 
   5   1  -3    0.19    0.05 
  -5   1   3    0.14    0.11 
   4  -1  -3  129.95    3.03 
   4  -1  -3  130.75    3.02 
   4  -1  -3  131.51    3.01 
  -4  -1   3  128.61    3.00 
  -4  -1   3  130.52    3.01 
  -4  -1   3  129.29    3.02 
  -4  -1   3  130.50    3.08 
  -4   1   3  137.68    3.02 
  -4   1   3  129.21    3.06 
   4   1  -3  132.07    2.95 
   4   1  -3  133.48    2.94 
   4   1  -3  132.83    2.99 
   4   1  -3  126.08    3.01 
  -4   1   3  124.24    3.15 
   4   1  -3  126.33    3.04 
   3  -1  -3    1.44    0.14 
  -3  -1   3    0.84    0.10 
   3  -1  -3    0.92    0.11 
  -3  -1   3    1.14    0.11 
  -3  -1   3    1.08    0.14 
   3  -1  -3    0.91    0.11 
  -3   1   3    1.03    0.11 
  -3   1   3    0.94    0.16 
   3   1  -3    0.85    0.10 
  -3   1   3    0.84    0.12 
   3   1  -3    0.93    0.07 
   3   1  -3    1.05    0.09 
   3   1  -3    1.09    0.11 
   3   1  -3    0.81    0.11 
  -2  -1   3  540.76   12.21 
  -2  -1   3  562.00   12.08 
  -2  -1   3  516.68   12.02 
   2  -1  -3  545.65   12.20 
  -2  -1   3  546.92   12.12 
  -2  -1   3  539.53   12.19 
   2  -1  -3  511.54   12.02 
   2   1  -3  551.82   11.92 
  -2   1   3  523.41   12.03 
   2   1  -3  542.67   12.24 
   2   1  -3  520.70   12.06 
   2   1  -3  537.83   12.11 
   2   1  -3  527.73   12.12 
  -2   1   3  511.51   12.07 
  -1  -1   3    4.61    0.14 
  -1  -1   3    4.85    0.13 
  -1  -1   3    4.95    0.17 
   1  -1  -3    4.66    0.23 
   1  -1  -3    4.66    0.17 
  -1  -1   3    4.59    0.18 
  -1  -1   3    4.93    0.21 
  -1   1   3    4.78    0.18 
   1   1  -3    4.77    0.20 
   1   1  -3    4.52    0.14 
   1   1  -3    4.57    0.18 
   1   1  -3    4.63    0.13 
  -1   1   3    4.74    0.22 
   0  -1   3  277.69    6.41 
   0  -1   3  272.53    6.36 
   0  -1   3  286.26    6.49 
   0  -1  -3  293.53    6.49 
   0  -1   3  294.51    6.49 
   0  -1  -3  298.83    6.44 
   0   1  -3  275.11    6.36 
   0   1   3  294.71    6.47 
   0   1  -3  274.69    6.35 
   0   1  -3  284.36    6.46 
   0   1   3  265.04    6.36 
   0   1  -3  279.55    6.43 
   1  -1   3  476.45   10.64 
  -1  -1  -3  466.25   10.47 
   1  -1   3  461.32   10.52 
   1  -1   3  458.36   10.61 
  -1  -1  -3  446.98   10.48 
   1  -1   3  466.15   10.49 
  -1  -1  -3  475.17   10.47 
   1   1   3  461.10   10.48 
  -1   1  -3  474.55   10.52 
   1   1   3  473.56   10.51 
   1   1   3  462.87   10.46 
  -1   1  -3  459.93   10.60 
  -1   1  -3  481.18   10.76 
  -2  -1  -3   31.54    0.76 
   2  -1   3   30.73    0.77 
  -2  -1  -3   30.61    0.69 
  -2  -1  -3   29.84    0.71 
  -2  -1  -3   30.24    0.74 
   2  -1   3   29.70    0.75 
   2  -1   3   31.69    0.74 
   2   1   3   30.55    0.70 
  -2   1  -3   31.71    0.76 
   2   1   3   31.34    0.74 
   2   1   3   30.78    0.71 
  -2   1  -3   29.29    0.76 
  -2   1  -3   29.62    0.74 
   2   1   3   30.56    0.73 
   3  -1   3   24.46    0.58 
   3  -1   3   25.47    0.64 
  -3  -1  -3   24.07    0.59 
  -3  -1  -3   24.45    0.65 
  -3  -1  -3   23.74    0.58 
  -3  -1  -3   23.15    0.61 
   3  -1   3   24.52    0.62 
   3  -1   3   23.98    0.64 
   3   1   3   24.57    0.56 
   3   1   3   23.26    0.61 
  -3   1  -3   23.87    0.62 
  -3   1  -3   24.43    0.59 
  -3   1  -3   23.99    0.65 
   3   1   3   24.58    0.57 
   3   1   3   24.58    0.62 
   4  -1   3    8.93    0.31 
  -4  -1  -3    8.94    0.28 
   4  -1   3    8.91    0.28 
  -4  -1  -3    8.99    0.27 
   4  -1   3    8.89    0.26 
  -4  -1  -3    9.12    0.34 
   4  -1   3    9.11    0.34 
  -4  -1  -3    8.71    0.30 
   4   1   3    9.47    0.34 
  -4   1  -3    8.80    0.27 
   4   1   3    8.82    0.32 
  -4   1  -3    8.46    0.34 
   4   1   3    8.93    0.25 
  -4   1  -3    8.83    0.31 
   4   1   3    8.85    0.32 
   4   1   3    8.97    0.24 
  -5  -1  -3   12.04    0.36 
   5  -1   3   12.32    0.34 
   5  -1   3   11.77    0.36 
  -5  -1  -3   11.90    0.45 
  -5  -1  -3   12.13    0.36 
   5  -1   3   11.87    0.45 
   5  -1   3   11.91    0.38 
   5   1   3   11.80    0.33 
  -5   1  -3   12.24    0.41 
   5   1   3   11.99    0.43 
  -5   1  -3   12.10    0.37 
  -5   1  -3   11.22    0.44 
   5   1   3   11.97    0.33 
   5   1   3   11.92    0.40 
   6  -1   3   17.82    0.49 
  -6  -1  -3   16.01    0.59 
   6  -1   3   17.26    0.48 
  -6  -1  -3   16.97    0.49 
  -6  -1  -3   17.10    0.49 
   6  -1   3   17.26    0.49 
   6  -1   3   17.09    0.61 
   6   1   3   17.43    0.46 
  -6   1  -3   17.80    0.55 
  -6   1  -3   16.30    0.59 
   6   1   3   18.00    0.46 
   6   1   3   17.35    0.53 
   6   1   3   17.95    0.60 
  -6   1  -3   17.67    0.51 
   7  -1   3    0.13    0.11 
  -7  -1  -3    0.01    0.16 
   7  -1   3   -0.08    0.13 
   7  -1   3    0.41    0.29 
  -7   1  -3   -0.20    0.16 
   7   1   3    0.12    0.10 
   7   1   3    0.07    0.10 
   7   1   3    0.27    0.26 
  -7   1  -3    0.04    0.14 
  -7   1  -3   -0.19    0.14 
   7   1   3    0.21    0.13 
  -8  -1  -3    1.76    0.33 
   8  -1   3    1.98    0.17 
   8  -1   3    1.94    0.41 
   8  -1   3    2.19    0.19 
   8   1   3    2.10    0.42 
   8   1   3    2.06    0.16 
  -8   1  -3    1.84    0.34 
   8   1   3    2.16    0.16 
   9  -1   3    0.14    0.52 
  -9  -1  -3   -0.17    0.27 
   9   1   3    0.44    0.55 
  -9   1  -3   -0.21    0.28 
  -9  -2   3    0.19    0.49 
   9  -2  -3    0.73    0.39 
   9  -2  -3    0.62    0.28 
   9  -2  -3    0.28    0.48 
  -9  -2   3    0.20    0.31 
  -9  -2   3   -0.53    0.50 
  -9   2   3    0.65    0.50 
  -9   2   3   -0.14    0.32 
  -9   2   3    0.39    0.53 
   9   2  -3    0.35    0.48 
   9   2  -3    0.35    0.29 
   9   2  -3    0.58    0.34 
  -8  -2   3    2.07    0.41 
   8  -2  -3    0.92    0.24 
   8  -2  -3    0.50    0.37 
   8  -2  -3    1.47    0.31 
  -8  -2   3    0.72    0.37 
  -8   2   3    0.95    0.29 
   8   2  -3    0.81    0.26 
  -8   2   3    1.58    0.41 
   8   2  -3    1.21    0.27 
   8   2  -3    1.24    0.37 
  -8   2   3   -0.07    0.36 
   7  -2  -3   -0.06    0.16 
  -7  -2   3    0.09    0.29 
  -7  -2   3   -0.20    0.26 
  -7  -2   3    0.37    0.17 
   7  -2  -3   -0.05    0.25 
   7  -2  -3    0.05    0.23 
   7   2  -3    0.08    0.25 
   7   2  -3    0.27    0.18 
  -7   2   3    0.04    0.16 
   7   2  -3    0.00    0.24 
  -7   2   3    0.18    0.28 
  -7   2   3    0.26    0.28 
   6  -2  -3   21.51    0.71 
   6  -2  -3   21.14    0.67 
  -6  -2   3   21.54    0.68 
   6  -2  -3   21.76    0.72 
  -6  -2   3   22.38    0.80 
  -6   2   3   22.66    0.70 
   6   2  -3   21.67    0.61 
   6   2  -3   21.97    0.67 
   6   2  -3   22.70    0.69 
   6   2  -3   22.16    0.70 
  -6   2   3   21.96    0.83 
   6   2  -3   21.65    0.58 
  -6   2   3   21.79    0.76 
  -5  -2   3    0.15    0.15 
   5  -2  -3    0.01    0.10 
   5  -2  -3   -0.03    0.15 
   5  -2  -3   -0.10    0.15 
  -5  -2   3   -0.08    0.10 
  -5  -2   3   -0.04    0.12 
  -5  -2   3   -0.10    0.16 
   5   2  -3    0.00    0.09 
   5   2  -3    0.04    0.08 
   5   2  -3   -0.08    0.11 
  -5   2   3    0.51    0.17 
  -5   2   3   -0.08    0.15 
  -5   2   3   -0.06    0.11 
   5   2  -3    0.00    0.14 
   5   2  -3   -0.08    0.11 
  -4  -2   3  127.59    2.88 
  -4  -2   3  125.67    2.97 
  -4  -2   3  123.48    2.87 
  -4  -2   3  122.23    2.88 
   4  -2  -3  121.37    2.89 
   4   2  -3  125.69    2.87 
  -4   2   3  123.01    2.93 
   4   2  -3  125.42    2.86 
   4   2  -3  131.35    2.81 
   4   2  -3  122.16    2.93 
  -4   2   3  121.27    2.88 
   4   2  -3  122.69    2.88 
  -4   2   3  122.61    3.00 
  -3  -2   3   12.12    0.45 
   3  -2  -3   12.14    0.50 
  -3  -2   3   11.96    0.30 
  -3  -2   3   12.48    0.36 
  -3  -2   3   12.13    0.38 
   3  -2  -3   12.66    0.39 
  -3  -2   3   11.35    0.36 
   3   2  -3   12.33    0.38 
   3   2  -3   12.52    0.42 
   3   2  -3   12.21    0.38 
  -3   2   3   11.94    0.40 
  -3   2   3   12.06    0.46 
   3   2  -3   12.20    0.36 
  -2  -2   3   39.76    1.06 
  -2  -2   3   41.84    0.92 
  -2  -2   3   41.08    1.02 
   2  -2  -3   39.73    1.00 
  -2  -2   3   40.41    0.96 
  -2  -2   3   40.09    0.99 
   2  -2  -3   41.84    1.12 
  -2   2   3   40.04    1.01 
  -2   2   3   40.86    1.08 
   2   2  -3   40.98    1.05 
   2   2  -3   40.24    1.01 
   2   2  -3   41.83    1.00 
   2   2  -3   41.19    0.96 
   1  -2  -3    0.32    0.06 
  -1  -2   3    0.19    0.07 
  -1  -2   3    0.46    0.10 
  -1  -2   3    0.30    0.04 
  -1  -2   3    0.32    0.06 
   1  -2  -3    0.38    0.09 
   1   2  -3    0.39    0.09 
   1   2  -3    0.23    0.06 
   1   2  -3    0.32    0.04 
  -1   2   3    0.29    0.06 
   1   2  -3    0.46    0.08 
  -1   2   3    0.22    0.08 
   0  -2   3    1.78    0.08 
   0  -2  -3    1.69    0.14 
   0  -2   3    1.95    0.16 
   0  -2  -3    1.93    0.07 
   0  -2  -3    1.82    0.10 
   0  -2   3    2.08    0.14 
   0  -2   3    1.89    0.10 
   0   2   3    1.83    0.15 
   0   2  -3    1.88    0.15 
   0   2   3    1.77    0.10 
   0   2  -3    1.82    0.15 
   0   2  -3    1.83    0.11 
  -1  -2  -3  153.94    3.55 
   1  -2   3  159.18    3.57 
  -1  -2  -3  158.67    3.53 
   1  -2   3  155.17    3.58 
   1  -2   3  151.57    3.51 
  -1  -2  -3  148.41    3.48 
  -1   2  -3  161.90    3.55 
  -1   2  -3  157.31    3.56 
   1   2   3  155.76    3.56 
  -1   2  -3  152.83    3.57 
   1   2   3  159.54    3.53 
   1   2   3  154.59    3.49 
  -2  -2  -3    3.76    0.15 
   2  -2   3    3.70    0.14 
   2  -2   3    4.17    0.20 
  -2  -2  -3    4.03    0.13 
  -2  -2  -3    3.96    0.15 
   2  -2   3    3.59    0.20 
  -2   2  -3    3.94    0.18 
  -2   2  -3    3.96    0.17 
  -2   2  -3    4.00    0.15 
   2   2   3    3.83    0.18 
   2   2   3    3.93    0.13 
   2   2   3    3.98    0.15 
  -2   2  -3    3.82    0.20 
   3  -2   3    4.39    0.22 
  -3  -2  -3    4.31    0.15 
  -3  -2  -3    4.27    0.19 
  -3  -2  -3    4.28    0.20 
   3  -2   3    4.51    0.16 
   3  -2   3    4.62    0.22 
   3  -2   3    4.25    0.22 
  -3  -2  -3    4.17    0.20 
  -3  -2  -3    4.07    0.19 
  -3   2  -3    4.48    0.20 
   3   2   3    4.44    0.21 
   3   2   3    4.60    0.19 
   3   2   3    4.35    0.15 
   3   2   3    4.43    0.19 
  -3   2  -3    4.12    0.23 
  -3   2  -3    4.27    0.21 
   4  -2   3   33.23    0.92 
  -4  -2  -3   33.27    0.79 
  -4  -2  -3   31.20    0.87 
   4  -2   3   32.80    0.85 
  -4  -2  -3   31.85    0.83 
   4  -2   3   33.62    0.86 
  -4  -2  -3   33.11    0.83 
   4  -2   3   33.08    0.81 
  -4   2  -3   33.08    0.83 
  -4   2  -3   32.63    0.88 
  -4   2  -3   32.65    0.89 
   4   2   3   33.51    0.79 
   4   2   3   33.41    0.84 
   4   2   3   33.27    0.81 
   4   2   3   33.36    0.84 
  -5  -2  -3    3.06    0.22 
  -5  -2  -3    2.87    0.22 
   5  -2   3    2.89    0.21 
   5  -2   3    3.02    0.23 
  -5  -2  -3    3.13    0.22 
   5  -2   3    2.71    0.18 
  -5   2  -3    2.94    0.27 
  -5   2  -3    2.96    0.24 
   5   2   3    3.13    0.15 
   5   2   3    2.72    0.21 
   5   2   3    3.11    0.18 
   6  -2   3    2.50    0.25 
  -6  -2  -3    2.84    0.27 
  -6  -2  -3    2.68    0.20 
   6  -2   3    2.55    0.23 
  -6  -2  -3    2.67    0.23 
   6  -2   3    2.82    0.30 
  -6  -2  -3    2.58    0.22 
   6  -2   3    2.55    0.19 
  -6   2  -3    2.75    0.24 
   6   2   3    2.60    0.19 
  -6   2  -3    2.69    0.27 
  -6   2  -3    2.79    0.26 
   6   2   3    2.67    0.17 
   6   2   3    2.98    0.28 
   6   2   3    3.17    0.28 
   7  -2   3    0.55    0.28 
   7  -2   3    0.74    0.17 
  -7  -2  -3    0.69    0.21 
   7  -2   3    0.72    0.15 
  -7   2  -3    0.76    0.21 
   7   2   3    0.58    0.28 
   7   2   3    0.57    0.18 
   7   2   3    0.60    0.12 
   7   2   3    0.60    0.12 
  -7   2  -3    0.62    0.22 
   8  -2   3    2.11    0.47 
  -8  -2  -3    1.71    0.33 
   8  -2   3    2.17    0.24 
   8  -2   3    1.77    0.20 
   8   2   3    2.13    0.20 
  -8   2  -3    1.56    0.32 
   8   2   3    1.82    0.18 
   8   2   3    1.64    0.41 
   9  -2   3    0.51    0.26 
  -9  -2  -3    0.26    0.34 
   9  -2   3    0.66    0.19 
   9  -2   3    0.11    0.59 
   9   2   3    0.47    0.54 
  -9   2  -3   -0.17    0.28 
  -9  -3   3   -0.01    0.57 
   9  -3  -3    1.08    0.43 
  -9  -3   3    0.92    0.33 
   9  -3  -3    0.78    0.30 
   9  -3  -3    0.02    0.56 
   9   3  -3    0.46    0.32 
   9   3  -3    0.62    0.51 
  -9   3   3    1.03    0.35 
   9   3  -3    1.23    0.37 
  -9   3   3    1.11    0.59 
  -9   3   3   -0.17    0.63 
   8  -3  -3   10.44    0.66 
   8  -3  -3    8.52    0.69 
  -8  -3   3    9.82    0.81 
   8  -3  -3    9.83    0.51 
  -8   3   3    8.88    0.83 
   8   3  -3   10.45    0.57 
  -8   3   3    9.87    0.58 
   8   3  -3    9.22    0.55 
   8   3  -3    9.93    0.68 
  -7  -3   3   -0.01    0.30 
   7  -3  -3    0.17    0.17 
  -7  -3   3    0.69    0.31 
  -7  -3   3    0.16    0.17 
   7  -3  -3    0.36    0.30 
   7  -3  -3    0.21    0.26 
   7   3  -3    0.10    0.25 
   7   3  -3    0.44    0.21 
   7   3  -3    0.49    0.13 
   7   3  -3    0.45    0.20 
  -7   3   3    0.33    0.28 
  -7   3   3    0.19    0.17 
  -6  -3   3   20.68    0.67 
   6  -3  -3   21.93    0.94 
   6  -3  -3   20.05    0.64 
  -6  -3   3   20.58    0.79 
  -6  -3   3   20.07    0.66 
  -6  -3   3   21.16    0.66 
   6  -3  -3   19.84    0.71 
   6   3  -3   19.98    0.64 
   6   3  -3   19.43    0.68 
   6   3  -3   19.16    0.64 
   6   3  -3   19.73    0.61 
  -6   3   3   18.83    0.91 
  -6   3   3   19.57    0.73 
  -6   3   3   19.06    0.65 
  -5  -3   3    3.08    0.25 
   5  -3  -3    3.42    0.25 
   5  -3  -3    2.88    0.34 
  -5  -3   3    2.96    0.24 
  -5  -3   3    2.82    0.30 
  -5  -3   3    3.07    0.17 
  -5  -3   3    3.14    0.22 
  -5   3   3    3.23    0.33 
  -5   3   3    3.33    0.32 
   5   3  -3    2.98    0.25 
   5   3  -3    2.90    0.24 
  -5   3   3    3.08    0.24 
   5   3  -3    3.19    0.25 
   5   3  -3    3.02    0.28 
  -4  -3   3    1.02    0.15 
   4  -3  -3    1.09    0.23 
  -4  -3   3    1.33    0.14 
   4  -3  -3    1.20    0.15 
  -4  -3   3    1.19    0.11 
  -4  -3   3    1.07    0.20 
  -4  -3   3    1.01    0.13 
   4   3  -3    1.27    0.15 
  -4   3   3    1.15    0.12 
  -4   3   3    1.13    0.18 
   4   3  -3    1.35    0.15 
   4   3  -3    0.76    0.15 
   4   3  -3    0.97    0.14 
  -4   3   3    1.24    0.20 
   3  -3  -3   12.45    0.55 
  -3  -3   3   12.90    0.33 
   3  -3  -3   13.10    0.41 
  -3  -3   3   13.18    0.50 
  -3  -3   3   12.48    0.38 
  -3  -3   3   13.24    0.41 
  -3   3   3   12.66    0.43 
   3   3  -3   12.34    0.46 
   3   3  -3   12.54    0.37 
   3   3  -3   13.05    0.41 
  -3   3   3   12.69    0.50 
  -3   3   3   12.56    0.39 
   3   3  -3   12.64    0.44 
   2  -3  -3   17.92    0.49 
  -2  -3   3   16.41    0.57 
  -2  -3   3   16.72    0.48 
   2  -3  -3   17.15    0.59 
  -2  -3   3   17.31    0.45 
  -2   3   3   17.24    0.59 
   2   3  -3   17.07    0.55 
   2   3  -3   16.56    0.44 
   2   3  -3   16.87    0.48 
   2   3  -3   17.14    0.52 
  -2   3   3   16.67    0.49 
   1  -3  -3    6.58    0.22 
  -1  -3   3    6.23    0.27 
  -1  -3   3    6.25    0.30 
  -1  -3   3    6.08    0.19 
  -1  -3   3    5.93    0.22 
  -1   3   3    6.30    0.30 
   1   3  -3    6.42    0.27 
  -1   3   3    5.96    0.23 
   1   3  -3    6.28    0.29 
   1   3  -3    6.13    0.19 
   1   3  -3    5.88    0.22 
   0  -3  -3   15.49    0.37 
   0  -3  -3   15.66    0.42 
   0  -3   3   15.47    0.51 
   0  -3  -3   15.15    0.50 
   0  -3   3   16.02    0.43 
   0  -3   3   15.26    0.38 
   0  -3   3   15.97    0.49 
   0   3  -3   15.52    0.48 
   0   3  -3   14.66    0.50 
   0   3   3   15.17    0.50 
   0   3  -3   15.61    0.43 
   0   3   3   15.43    0.42 
  -1  -3  -3   93.26    2.15 
   1  -3   3   94.42    2.26 
  -1  -3  -3   95.73    2.18 
   1  -3   3   97.83    2.19 
  -1  -3  -3   97.07    2.27 
   1  -3   3   94.82    2.29 
   1   3   3   93.66    2.18 
  -1   3  -3   91.24    2.19 
   1   3   3   92.11    2.27 
  -1   3  -3   98.88    2.29 
   1   3   3   94.30    2.15 
  -1   3  -3   99.49    2.26 
  -2  -3  -3   40.42    0.94 
  -2  -3  -3   39.35    1.02 
  -2  -3  -3   39.51    0.94 
   2  -3   3   38.51    1.02 
   2  -3   3   39.14    0.96 
   2  -3   3   39.10    1.05 
  -2  -3  -3   39.28    0.95 
  -2   3  -3   39.77    1.02 
  -2   3  -3   37.65    1.04 
  -2   3  -3   39.12    0.96 
   2   3   3   39.84    0.94 
   2   3   3   38.48    1.02 
   2   3   3   41.14    0.93 
   3  -3   3   13.30    0.47 
  -3  -3  -3   13.77    0.40 
   3  -3   3   13.44    0.39 
   3  -3   3   14.12    0.45 
  -3  -3  -3   12.88    0.39 
  -3  -3  -3   13.66    0.37 
  -3   3  -3   13.48    0.42 
   3   3   3   13.74    0.44 
   3   3   3   13.58    0.37 
   3   3   3   12.79    0.38 
  -3   3  -3   13.25    0.40 
  -3   3  -3   13.38    0.49 
  -3   3  -3   14.32    0.44 
   4  -3   3    0.28    0.10 
   4  -3   3    0.50    0.15 
   4  -3   3    0.40    0.08 
  -4  -3  -3    0.38    0.07 
  -4  -3  -3    0.28    0.10 
  -4  -3  -3    0.31    0.13 
   4   3   3    0.39    0.08 
  -4   3  -3    0.25    0.15 
  -4   3  -3    0.25    0.12 
   4   3   3    0.27    0.11 
   4   3   3    0.29    0.12 
  -4   3  -3    0.36    0.10 
  -4   3  -3    0.27    0.10 
  -5  -3  -3    0.64    0.11 
  -5  -3  -3    0.61    0.16 
   5  -3   3    0.48    0.19 
   5  -3   3    0.52    0.10 
  -5  -3  -3    0.47    0.15 
  -5  -3  -3    0.39    0.13 
   5  -3   3    0.38    0.11 
  -5   3  -3    0.31    0.14 
  -5   3  -3    0.55    0.14 
   5   3   3    0.53    0.13 
   5   3   3    0.30    0.14 
   5   3   3    0.55    0.10 
  -5   3  -3    0.38    0.10 
  -5   3  -3    0.44    0.18 
  -6  -3  -3    2.83    0.29 
  -6  -3  -3    2.33    0.25 
  -6  -3  -3    2.43    0.23 
   6  -3   3    2.49    0.20 
   6  -3   3    2.33    0.24 
  -6  -3  -3    2.26    0.22 
  -6   3  -3    2.48    0.29 
   6   3   3    2.50    0.19 
  -6   3  -3    2.04    0.24 
   6   3   3    2.23    0.23 
   6   3   3    2.08    0.24 
   7  -3   3    2.76    0.27 
  -7  -3  -3    3.41    0.26 
  -7  -3  -3    3.31    0.37 
   7  -3   3    3.57    0.41 
   7   3   3    3.60    0.37 
  -7   3  -3    3.11    0.35 
   7   3   3    3.34    0.23 
   7   3   3    2.89    0.33 
   7   3   3    3.23    0.25 
   8  -3   3   -0.05    0.20 
   8  -3   3    0.23    0.41 
   8  -3   3    0.26    0.23 
  -8   3  -3    0.12    0.29 
   8   3   3   -0.32    0.38 
   8   3   3    0.02    0.13 
   8   3   3   -0.35    0.20 
  -8   3  -3   -0.29    0.23 
   8   3   3    0.12    0.14 
  -8   3  -3   -0.87    0.29 
   8   3   3    0.08    0.24 
   9  -4  -3    0.35    0.48 
  -9  -4   3    0.01    0.65 
   9  -4  -3    0.02    0.37 
   9  -4  -3   -0.10    0.57 
  -9   4   3    0.35    0.65 
   9   4  -3    0.50    0.52 
  -9   4   3    0.00    0.33 
   9   4  -3    0.49    0.37 
  -8  -4   3    0.32    0.44 
   8  -4  -3    0.76    0.27 
   8  -4  -3    0.38    0.38 
  -8  -4   3   -0.48    0.42 
   8  -4  -3    0.84    0.44 
  -8   4   3   -0.02    0.42 
   8   4  -3    0.73    0.19 
   8   4  -3    0.74    0.29 
  -8   4   3    0.71    0.27 
  -8   4   3    1.41    0.48 
   8   4  -3    1.34    0.41 
   8   4  -3    0.66    0.30 
   7  -4  -3    0.24    0.19 
  -7  -4   3    0.01    0.31 
   7  -4  -3   -0.26    0.31 
   7  -4  -3    0.09    0.32 
   7   4  -3    0.13    0.17 
   7   4  -3    0.35    0.25 
  -7   4   3   -0.49    0.35 
   7   4  -3    0.06    0.21 
  -7   4   3    0.19    0.17 
   7   4  -3    0.25    0.28 
  -7   4   3   -0.21    0.30 
  -6  -4   3    0.32    0.21 
  -6  -4   3    0.23    0.27 
  -6  -4   3    0.30    0.23 
   6  -4  -3    0.28    0.15 
  -6   4   3    0.17    0.26 
   6   4  -3    0.29    0.17 
   6   4  -3    0.40    0.20 
   6   4  -3    0.18    0.19 
  -6   4   3    0.25    0.24 
  -6   4   3    0.12    0.17 
   6   4  -3    0.40    0.17 
   5  -4  -3    3.67    0.26 
  -5  -4   3    3.86    0.19 
  -5  -4   3    4.23    0.27 
  -5  -4   3    3.52    0.31 
   5  -4  -3    3.50    0.42 
  -5  -4   3    3.65    0.36 
  -5   4   3    4.04    0.20 
   5   4  -3    3.45    0.29 
  -5   4   3    3.57    0.27 
   5   4  -3    3.38    0.33 
   5   4  -3    3.78    0.31 
   5   4  -3    3.97    0.28 
  -5   4   3    3.90    0.36 
  -5   4   3    3.14    0.34 
  -4  -4   3    0.93    0.15 
   4  -4  -3    0.67    0.13 
   4  -4  -3    0.77    0.24 
  -4  -4   3    0.78    0.09 
  -4  -4   3    0.88    0.22 
  -4  -4   3    0.77    0.13 
   4   4  -3    0.89    0.13 
   4   4  -3    0.86    0.19 
  -4   4   3    1.10    0.18 
   4   4  -3    0.98    0.16 
   4   4  -3    0.64    0.14 
  -4   4   3    0.88    0.12 
  -4   4   3    0.79    0.22 
  -3  -4   3    3.10    0.20 
  -3  -4   3    3.57    0.32 
  -3  -4   3    3.27    0.20 
   3  -4  -3    3.11    0.33 
   3  -4  -3    3.45    0.21 
  -3  -4   3    3.41    0.14 
  -3   4   3    3.17    0.24 
   3   4  -3    3.05    0.28 
  -3   4   3    3.43    0.22 
   3   4  -3    3.33    0.21 
  -3   4   3    2.79    0.30 
   3   4  -3    3.21    0.19 
   3   4  -3    3.26    0.26 
   2  -4  -3   74.60    1.97 
  -2  -4   3   76.65    1.84 
  -2  -4   3   78.43    1.79 
   2  -4  -3   78.04    1.85 
  -2  -4   3   77.28    1.97 
   2   4  -3   76.53    1.84 
   2   4  -3   78.95    1.95 
   2   4  -3   75.94    1.78 
   2   4  -3   80.34    1.92 
  -2   4   3   76.32    1.98 
  -2   4   3   78.17    1.86 
  -1  -4   3   -0.03    0.09 
  -1  -4   3    0.06    0.06 
  -1  -4   3    0.10    0.06 
   1  -4  -3   -0.02    0.10 
   1  -4  -3    0.10    0.07 
  -1  -4   3    0.13    0.12 
  -1   4   3    0.00    0.07 
   1   4  -3    0.02    0.09 
   1   4  -3    0.04    0.07 
  -1   4   3    0.03    0.11 
   1   4  -3    0.12    0.11 
   1   4  -3    0.00    0.05 
   0  -4  -3   56.57    1.52 
   0  -4  -3   59.33    1.41 
   0  -4   3   59.76    1.50 
   0  -4   3   60.62    1.42 
   0  -4  -3   59.87    1.35 
   0  -4   3   57.06    1.53 
   0  -4   3   60.45    1.36 
   0   4  -3   56.66    1.49 
   0   4   3   59.70    1.42 
   0   4  -3   57.92    1.53 
   0   4  -3   60.13    1.42 
   0   4   3   59.66    1.53 
   1  -4   3    0.92    0.13 
  -1  -4  -3    1.15    0.11 
   1  -4   3    1.07    0.16 
  -1  -4  -3    1.24    0.10 
  -1  -4  -3    0.99    0.15 
   1  -4   3    0.94    0.10 
  -1   4  -3    0.93    0.16 
   1   4   3    1.12    0.12 
  -1   4  -3    1.27    0.16 
  -1   4  -3    0.93    0.11 
   1   4   3    0.89    0.16 
   1   4   3    1.02    0.09 
  -2  -4  -3    0.33    0.14 
   2  -4   3    0.49    0.08 
  -2  -4  -3    0.43    0.07 
   2  -4   3    0.59    0.13 
  -2  -4  -3    0.70    0.09 
   2  -4   3    0.62    0.14 
   2   4   3    0.45    0.07 
   2   4   3    0.68    0.15 
  -2   4  -3    0.53    0.09 
  -2   4  -3    0.40    0.12 
   2   4   3    0.64    0.09 
  -2   4  -3    0.75    0.15 
  -3  -4  -3   16.74    0.47 
   3  -4   3   16.27    0.54 
  -3  -4  -3   16.23    0.47 
   3  -4   3   16.09    0.48 
  -3  -4  -3   16.93    0.47 
  -3  -4  -3   16.38    0.56 
   3  -4   3   16.68    0.60 
   3   4   3   16.56    0.46 
   3   4   3   16.92    0.45 
  -3   4  -3   16.37    0.49 
  -3   4  -3   16.43    0.60 
   3   4   3   16.06    0.55 
  -3   4  -3   15.81    0.53 
  -4  -4  -3    2.48    0.26 
  -4  -4  -3    2.40    0.17 
   4  -4   3    2.56    0.19 
   4  -4   3    2.99    0.28 
  -4  -4  -3    2.44    0.20 
  -4  -4  -3    2.84    0.24 
   4  -4   3    2.53    0.24 
  -4   4  -3    2.75    0.23 
   4   4   3    2.30    0.24 
  -4   4  -3    2.36    0.21 
   4   4   3    2.51    0.21 
   4   4   3    2.40    0.17 
  -4   4  -3    2.36    0.22 
  -4   4  -3    2.62    0.28 
  -5  -4  -3    0.29    0.14 
   5  -4   3    0.22    0.11 
  -5  -4  -3    0.16    0.18 
  -5  -4  -3    0.24    0.10 
   5  -4   3   -0.06    0.12 
   5  -4   3    0.35    0.21 
   5   4   3    0.09    0.12 
  -5   4  -3   -0.08    0.20 
   5   4   3    0.17    0.15 
  -5   4  -3    0.26    0.12 
  -5   4  -3    0.14    0.15 
   5   4   3    0.11    0.10 
  -5   4  -3    0.09    0.14 
   6  -4   3    0.72    0.15 
  -6  -4  -3    0.64    0.18 
  -6  -4  -3    0.56    0.15 
   6  -4   3    0.88    0.28 
   6   4   3    0.78    0.14 
   6   4   3    0.79    0.19 
   6   4   3    0.67    0.22 
  -6   4  -3    0.41    0.19 
  -6   4  -3    0.83    0.28 
   7  -4   3    0.92    0.18 
   7  -4   3    1.23    0.29 
  -7  -4  -3    0.94    0.25 
  -7  -4  -3    1.02    0.23 
   7   4   3    0.91    0.28 
   7   4   3    1.00    0.17 
   7   4   3    1.02    0.30 
  -7   4  -3    0.98    0.35 
  -7   4  -3   -0.12    0.24 
  -7   4  -3    0.95    0.29 
   7   4   3    1.28    0.21 
   8  -4   3    0.16    0.29 
   8  -4   3    0.23    0.47 
  -8   4  -3   -0.21    0.47 
   8   4   3    0.35    0.19 
   8   4   3    0.58    0.39 
   8   4   3    0.43    0.31 
   8   4   3    0.31    0.29 
  -8   4  -3    0.30    0.31 
   8   4   3    0.21    0.17 
  -8   4  -3   -0.31    0.26 
  -8  -5   3    0.57    0.49 
   8  -5  -3   -0.07    0.46 
   8  -5  -3   -0.02    0.27 
   8  -5  -3   -0.15    0.45 
  -8  -5   3    0.19    0.38 
   8   5  -3    0.15    0.29 
   8   5  -3   -0.18    0.30 
  -8   5   3    0.06    0.47 
   8   5  -3    0.16    0.41 
   8   5  -3    0.43    0.27 
  -8   5   3    0.16    0.53 
  -8   5   3    0.02    0.28 
  -7  -5   3    3.33    0.42 
   7  -5  -3    2.90    0.43 
  -7  -5   3    3.08    0.35 
   7  -5  -3    3.03    0.32 
   7   5  -3    2.65    0.34 
   7   5  -3    2.71    0.31 
   7   5  -3    2.48    0.33 
   7   5  -3    3.06    0.34 
  -7   5   3    2.74    0.50 
   6  -5  -3    1.01    0.21 
  -6  -5   3    0.80    0.20 
   6  -5  -3    1.66    0.40 
  -6  -5   3    1.09    0.34 
  -6  -5   3    1.27    0.15 
   6   5  -3    1.18    0.25 
   6   5  -3    1.54    0.25 
   6   5  -3    0.85    0.27 
  -6   5   3    1.24    0.31 
   6   5  -3    1.24    0.22 
  -6   5   3    0.86    0.22 
   5  -5  -3    0.14    0.29 
  -5  -5   3    0.23    0.14 
   5  -5  -3    0.47    0.16 
  -5  -5   3    0.39    0.27 
  -5  -5   3    0.37    0.10 
   5   5  -3    0.27    0.17 
   5   5  -3    0.14    0.18 
   5   5  -3    0.18    0.14 
   5   5  -3    0.47    0.21 
  -5   5   3    0.20    0.13 
  -5   5   3    0.18    0.20 
  -4  -5   3    0.08    0.22 
  -4  -5   3    0.03    0.13 
   4  -5  -3    0.22    0.21 
  -4  -5   3    0.07    0.11 
  -4  -5   3    0.12    0.09 
   4  -5  -3    0.12    0.12 
  -4   5   3   -0.03    0.19 
   4   5  -3    0.13    0.13 
  -4   5   3    0.05    0.15 
   4   5  -3    0.07    0.18 
  -4   5   3    0.18    0.13 
   4   5  -3    0.33    0.17 
   4   5  -3    0.35    0.13 
   3  -5  -3   17.30    0.68 
  -3  -5   3   16.01    0.48 
  -3  -5   3   16.48    0.52 
  -3  -5   3   17.14    0.67 
   3  -5  -3   16.89    0.53 
   3   5  -3   16.79    0.47 
  -3   5   3   16.24    0.67 
   3   5  -3   16.20    0.63 
  -3   5   3   16.16    0.56 
  -3   5   3   16.35    0.55 
   3   5  -3   15.35    0.59 
   3   5  -3   16.03    0.52 
  -2  -5   3    0.41    0.17 
  -2  -5   3    0.61    0.11 
   2  -5  -3    0.55    0.11 
  -2  -5   3    0.70    0.11 
   2  -5  -3    0.30    0.14 
  -2   5   3    0.76    0.14 
   2   5  -3    0.72    0.10 
   2   5  -3    0.35    0.14 
   2   5  -3    0.59    0.12 
   2   5  -3    0.05    0.14 
  -2   5   3    0.52    0.19 
   1  -5  -3    7.66    0.30 
  -1  -5   3    7.56    0.42 
  -1  -5   3    8.02    0.26 
  -1  -5   3    7.70    0.30 
   1   5  -3    7.36    0.37 
   1   5  -3    7.73    0.25 
  -1   5   3    7.64    0.31 
  -1   5   3    6.93    0.41 
   1   5  -3    7.85    0.42 
   1   5  -3    7.49    0.31 
   0  -5  -3   30.24    0.95 
   0  -5   3   29.85    0.95 
   0  -5   3   29.32    0.81 
   0  -5   3   31.56    0.76 
   0  -5  -3   31.89    0.81 
   0  -5   3   32.41    0.92 
   0  -5  -3   31.81    0.75 
   0   5  -3   30.14    0.82 
   0   5  -3   32.28    0.92 
   0   5   3   31.46    0.96 
   0   5  -3   30.26    0.94 
   0   5   3   30.09    0.82 
   1  -5   3    4.58    0.34 
  -1  -5  -3    4.23    0.21 
  -1  -5  -3    4.05    0.32 
  -1  -5  -3    4.16    0.17 
   1  -5   3    4.19    0.29 
   1  -5   3    4.53    0.22 
  -1   5  -3    4.16    0.27 
  -1   5  -3    4.40    0.32 
   1   5   3    4.35    0.33 
   1   5   3    4.35    0.17 
  -1   5  -3    4.44    0.23 
   1   5   3    4.47    0.22 
  -2  -5  -3    2.69    0.17 
  -2  -5  -3    2.80    0.17 
  -2  -5  -3    2.69    0.29 
   2  -5   3    3.06    0.30 
   2  -5   3    3.01    0.19 
   2  -5   3    3.05    0.25 
   2   5   3    2.75    0.16 
   2   5   3    2.79    0.18 
  -2   5  -3    2.70    0.28 
  -2   5  -3    2.41    0.19 
  -2   5  -3    2.80    0.26 
   2   5   3    3.05    0.29 
  -3  -5  -3    3.10    0.21 
   3  -5   3    2.66    0.26 
   3  -5   3    2.56    0.27 
  -3  -5  -3    2.99    0.32 
  -3  -5  -3    2.94    0.19 
  -3  -5  -3    2.81    0.19 
   3  -5   3    2.65    0.19 
   3   5   3    2.82    0.18 
  -3   5  -3    2.78    0.22 
  -3   5  -3    3.14    0.26 
   3   5   3    2.52    0.19 
   3   5   3    2.86    0.30 
  -3   5  -3    3.14    0.32 
   4  -5   3    8.39    0.41 
   4  -5   3    8.44    0.35 
  -4  -5  -3    8.52    0.32 
   4  -5   3    8.36    0.47 
  -4  -5  -3    8.34    0.36 
  -4  -5  -3    9.07    0.46 
  -4   5  -3    8.28    0.39 
   4   5   3    8.21    0.33 
   4   5   3    8.43    0.33 
   4   5   3    9.21    0.44 
  -4   5  -3    8.85    0.38 
  -4   5  -3    7.45    0.51 
  -4   5  -3    8.23    0.36 
   5  -5   3    0.04    0.13 
  -5  -5  -3    0.36    0.20 
   5  -5   3    0.64    0.26 
  -5  -5  -3    0.19    0.12 
  -5  -5  -3   -0.01    0.20 
  -5  -5  -3    0.20    0.15 
  -5   5  -3    0.09    0.14 
   5   5   3    0.03    0.16 
   5   5   3    0.06    0.16 
  -5   5  -3   -0.15    0.25 
  -5   5  -3    0.14    0.17 
  -5   5  -3    0.24    0.17 
   5   5   3    0.18    0.13 
  -6  -5  -3    1.19    0.21 
  -6  -5  -3    1.23    0.29 
   6  -5   3    1.12    0.43 
   6  -5   3    1.53    0.20 
  -6  -5  -3    1.43    0.18 
   6   5   3    1.40    0.18 
   6   5   3    1.23    0.23 
  -6   5  -3    1.23    0.33 
   6   5   3    1.39    0.21 
  -6   5  -3    1.21    0.24 
  -7  -5  -3    0.34    0.28 
  -7  -5  -3    0.57    0.22 
   7  -5   3    0.42    0.37 
   7  -5   3    0.54    0.20 
  -7   5  -3   -0.59    0.41 
   7   5   3    0.76    0.24 
   7   5   3    0.45    0.31 
  -7   5  -3    0.67    0.28 
   7   5   3    0.75    0.30 
  -7   5  -3   -0.31    0.27 
   8  -5   3   -0.12    0.22 
   8  -5   3   -0.02    0.38 
  -8  -5  -3   -0.26    0.27 
  -8  -5  -3    0.44    0.43 
   8  -5   3   -0.11    0.54 
   8   5   3    0.26    0.37 
  -8   5  -3   -0.65    0.45 
   8   5   3    0.36    0.41 
  -8   5  -3   -0.02    0.29 
   8   5   3    0.34    0.21 
   8   5   3    0.15    0.23 
   8  -6  -3    0.57    0.54 
  -8  -6   3    0.66    0.42 
  -8  -6   3    0.52    0.55 
   8  -6  -3    0.87    0.56 
  -8  -6   3    0.54    0.63 
   8  -6  -3    0.24    0.31 
  -8   6   3    0.90    0.31 
   8   6  -3    0.87    0.35 
  -8   6   3    0.97    0.67 
   8   6  -3    0.39    0.38 
   8   6  -3    1.13    0.39 
   8   6  -3    0.70    0.42 
  -8   6   3   -0.53    0.51 
  -7  -6   3    0.01    0.36 
   7  -6  -3    0.30    0.26 
  -7  -6   3    1.04    0.28 
  -7  -6   3    0.19    0.44 
   7  -6  -3    0.79    0.51 
  -7   6   3    0.66    0.28 
   7   6  -3    0.46    0.28 
   7   6  -3    0.66    0.31 
   7   6  -3    0.11    0.31 
  -7   6   3    0.87    0.53 
  -7   6   3    0.17    0.37 
   7   6  -3    0.93    0.31 
  -6  -6   3    1.13    0.40 
  -6  -6   3    0.92    0.28 
  -6  -6   3    0.58    0.15 
   6  -6  -3    0.66    0.22 
   6  -6  -3    1.18    0.44 
   6   6  -3    1.15    0.29 
   6   6  -3    0.69    0.25 
   6   6  -3    0.55    0.22 
  -6   6   3    0.79    0.22 
  -6   6   3    0.78    0.37 
  -6   6   3    0.07    0.16 
  -6   6   3    0.26    0.28 
   6   6  -3    0.30    0.29 
  -5  -6   3    6.34    0.27 
  -5  -6   3    6.40    0.38 
   5  -6  -3    5.99    0.38 
  -5  -6   3    6.00    0.60 
   5  -6  -3    5.65    0.68 
  -5  -6   3    5.51    0.40 
  -5   6   3    6.44    0.57 
  -5   6   3    6.01    0.36 
   5   6  -3    6.32    0.46 
   5   6  -3    5.69    0.50 
   5   6  -3    6.01    0.48 
   5   6  -3    5.76    0.43 
  -5   6   3    6.90    0.47 
   4  -6  -3    1.41    0.30 
  -4  -6   3    2.04    0.35 
  -4  -6   3    1.63    0.14 
   4  -6  -3    1.78    0.21 
  -4  -6   3    1.53    0.20 
  -4  -6   3    1.62    0.20 
   4   6  -3    1.28    0.19 
  -4   6   3    1.83    0.34 
   4   6  -3    2.31    0.31 
  -4   6   3    1.34    0.23 
   4   6  -3    1.81    0.27 
  -4   6   3    1.92    0.23 
   4   6  -3    1.28    0.17 
  -3  -6   3    0.37    0.13 
  -3  -6   3    0.57    0.23 
   3  -6  -3    0.52    0.13 
  -3  -6   3    0.31    0.12 
   3  -6  -3    0.28    0.19 
   3   6  -3    0.40    0.12 
  -3   6   3    0.23    0.15 
   3   6  -3    0.46    0.18 
  -3   6   3    0.20    0.14 
  -3   6   3    0.51    0.26 
   3   6  -3    0.31    0.13 
   3   6  -3    0.28    0.20 
  -2  -6   3    2.35    0.20 
  -2  -6   3    2.38    0.30 
   2  -6  -3    2.72    0.32 
  -2  -6   3    2.88    0.19 
   2  -6  -3    2.32    0.21 
  -2   6   3    2.78    0.32 
  -2   6   3    2.71    0.25 
   2   6  -3    2.75    0.18 
   2   6  -3    1.84    0.26 
   2   6  -3    1.59    0.23 
   2   6  -3    2.43    0.22 
  -2   6   3    2.14    0.24 
  -1  -6   3    0.09    0.10 
   1  -6  -3   -0.14    0.16 
   1  -6  -3    0.09    0.09 
  -1  -6   3    0.06    0.17 
  -1  -6   3    0.13    0.09 
  -1   6   3    0.01    0.18 
  -1   6   3   -0.04    0.10 
   1   6  -3    0.20    0.13 
   1   6  -3    0.12    0.11 
   1   6  -3    0.08    0.08 
   1   6  -3    0.14    0.20 
   0  -6   3   12.36    0.36 
   0  -6  -3   12.50    0.57 
   0  -6   3   12.41    0.43 
   0  -6  -3   11.70    0.41 
   0  -6  -3   12.29    0.35 
   0  -6   3   11.96    0.57 
   0   6  -3   12.10    0.43 
   0   6   3   12.07    0.43 
   0   6   3   12.20    0.57 
   0   6  -3   12.33    0.57 
   0   6  -3   11.92    0.51 
  -1  -6  -3   23.15    0.80 
   1  -6   3   22.17    0.57 
  -1  -6  -3   22.20    0.57 
   1  -6   3   21.70    0.64 
  -1  -6  -3   22.20    0.63 
   1  -6   3   22.47    0.81 
  -1   6  -3   20.74    0.64 
  -1   6  -3   21.31    0.79 
   1   6   3   21.53    0.64 
  -1   6  -3   21.64    0.74 
   1   6   3   21.35    0.79 
  -2  -6  -3    0.33    0.09 
   2  -6   3    0.37    0.12 
  -2  -6  -3    0.40    0.19 
  -2  -6  -3    0.38    0.10 
   2  -6   3    0.59    0.20 
   2   6   3    0.47    0.10 
   2   6   3    0.43    0.12 
   2   6   3    0.41    0.19 
  -2   6  -3    0.37    0.13 
  -2   6  -3    0.35    0.16 
  -2   6  -3    0.48    0.19 
  -3  -6  -3    1.53    0.16 
  -3  -6  -3    1.98    0.19 
   3  -6   3    1.69    0.27 
   3  -6   3    1.73    0.17 
  -3  -6  -3    1.72    0.27 
  -3   6  -3    1.90    0.23 
   3   6   3    2.14    0.16 
  -3   6  -3    1.60    0.26 
  -3   6  -3    2.29    0.24 
   3   6   3    1.70    0.26 
   3   6   3    2.05    0.21 
  -4  -6  -3    9.69    0.39 
   4  -6   3    9.04    0.39 
  -4  -6  -3    9.25    0.54 
  -4  -6  -3    9.36    0.40 
   4  -6   3    8.28    0.54 
  -4  -6  -3    9.12    0.38 
  -4   6  -3    9.43    0.44 
   4   6   3    8.78    0.37 
   4   6   3    9.15    0.51 
  -4   6  -3    8.33    0.56 
   4   6   3    9.12    0.36 
  -4   6  -3    9.44    0.47 
  -5  -6  -3   38.04    1.00 
   5  -6   3   37.76    1.02 
  -5  -6  -3   37.03    0.99 
  -5  -6  -3   30.64    1.12 
  -5  -6  -3   36.50    1.27 
   5   6   3   37.04    1.10 
  -5   6  -3   37.58    1.24 
  -5   6  -3   35.68    1.05 
   5   6   3   37.53    0.97 
  -5   6  -3   37.45    1.06 
   5   6   3   37.04    0.99 
  -5   6  -3   38.54    1.07 
  -6  -6  -3    3.09    0.30 
   6  -6   3    2.79    0.27 
   6  -6   3    3.44    0.52 
  -6  -6  -3    2.92    0.27 
   6   6   3    3.28    0.32 
   6   6   3    2.75    0.29 
  -6   6  -3    2.37    0.32 
   6   6   3    2.69    0.28 
  -7  -6  -3    0.35    0.40 
  -7  -6  -3    0.58    0.25 
  -7  -6  -3   -0.16    0.34 
   7  -6   3    0.75    0.46 
   7  -6   3    0.62    0.22 
   7   6   3   -0.03    0.39 
  -7   6  -3    0.58    0.30 
   7   6   3    0.41    0.32 
  -7   6  -3    0.38    0.46 
   7   6   3    0.61    0.21 
  -7   6  -3   -0.11    0.32 
   7   6   3    0.77    0.25 
   8  -6   3    0.98    0.49 
   8  -6   3    0.88    0.32 
  -8  -6  -3    0.94    0.29 
   8   6   3    1.01    0.35 
   8   6   3    0.91    0.46 
  -8   6  -3    0.42    0.56 
   8   6   3    1.24    0.27 
  -8   6  -3    0.55    0.33 
  -8  -7   3    0.11    0.47 
   8  -7  -3    0.20    0.36 
   8  -7  -3    0.09    0.66 
   8   7  -3    0.64    0.59 
  -8   7   3    0.72    0.35 
   8   7  -3    0.15    0.46 
   8   7  -3    1.07    0.42 
  -8   7   3    0.23    0.60 
   8   7  -3    0.76    0.45 
  -7  -7   3    3.36    0.39 
  -7  -7   3    3.84    0.52 
   7  -7  -3    4.71    0.66 
   7  -7  -3    4.06    0.40 
  -7   7   3    3.45    0.70 
   7   7  -3    3.87    0.40 
   7   7  -3    3.99    0.49 
  -7   7   3    3.41    0.40 
   7   7  -3    3.73    0.41 
  -6  -7   3    0.43    0.31 
   6  -7  -3    0.25    0.23 
  -6  -7   3    0.71    0.43 
   6  -7  -3    0.62    0.46 
  -6  -7   3    0.36    0.16 
  -6  -7   3    0.55    0.23 
  -6   7   3   -0.23    0.47 
   6   7  -3    0.40    0.32 
  -6   7   3    0.26    0.33 
  -6   7   3    0.18    0.20 
   6   7  -3   -0.02    0.26 
   6   7  -3    0.53    0.33 
   6   7  -3    0.55    0.26 
   5  -7  -3    6.07    0.41 
  -5  -7   3    5.88    0.29 
  -5  -7   3    5.86    0.57 
   5  -7  -3    6.59    0.67 
   5   7  -3    5.15    0.53 
   5   7  -3    6.57    0.52 
   5   7  -3    5.90    0.38 
  -5   7   3    5.76    0.52 
   5   7  -3    5.46    0.41 
  -5   7   3    6.39    0.43 
  -4  -7   3    2.06    0.17 
   4  -7  -3    2.72    0.46 
  -4  -7   3    2.00    0.23 
  -4  -7   3    2.25    0.37 
   4  -7  -3    2.25    0.25 
  -4  -7   3    2.39    0.25 
   4   7  -3    2.28    0.21 
   4   7  -3    2.09    0.25 
  -4   7   3    3.06    0.31 
  -4   7   3    2.06    0.27 
   4   7  -3    2.77    0.38 
   4   7  -3    2.44    0.31 
  -3  -7   3    0.10    0.26 
   3  -7  -3    0.13    0.22 
  -3  -7   3    0.04    0.14 
  -3  -7   3   -0.01    0.13 
   3  -7  -3   -0.24    0.12 
   3   7  -3   -0.02    0.13 
  -3   7   3    0.10    0.16 
   3   7  -3   -0.01    0.20 
   3   7  -3   -0.09    0.13 
   3   7  -3    0.03    0.23 
  -3   7   3    0.13    0.18 
  -3   7   3   -0.15    0.26 
   2  -7  -3    4.95    0.46 
  -2  -7   3    6.23    0.52 
  -2  -7   3    5.70    0.32 
  -2  -7   3    6.30    0.29 
   2  -7  -3    6.19    0.33 
   2   7  -3    5.94    0.27 
   2   7  -3    5.70    0.42 
   2   7  -3    6.08    0.33 
   2   7  -3    6.22    0.49 
  -2   7   3    5.79    0.52 
  -2   7   3    6.00    0.36 
  -2   7   3    6.11    0.42 
   1  -7  -3   14.51    0.42 
   1  -7  -3   14.80    0.51 
   1  -7  -3   15.36    0.70 
  -1  -7   3   13.73    0.68 
  -1  -7   3   14.51    0.51 
  -1  -7   3   14.56    0.44 
   1   7  -3   14.70    0.62 
  -1   7   3   13.90    0.68 
   1   7  -3   13.70    0.50 
  -1   7   3   14.21    0.52 
   1   7  -3   14.50    0.69 
   0  -7   3   -0.07    0.09 
   0  -7  -3    0.32    0.22 
   0  -7   3   -0.11    0.11 
   0  -7  -3   -0.10    0.09 
   0  -7  -3    0.10    0.08 
   0  -7   3    0.06    0.20 
   0   7  -3   -0.14    0.14 
   0   7  -3    0.04    0.13 
   0   7   3   -0.03    0.12 
   0   7   3    0.13    0.22 
   0   7  -3    0.01    0.20 
   1  -7   3    2.54    0.18 
  -1  -7  -3    2.56    0.22 
   1  -7   3    2.74    0.24 
  -1  -7  -3    2.62    0.19 
   1  -7   3    2.61    0.38 
  -1  -7  -3    3.13    0.37 
   1   7   3    2.94    0.38 
   1   7   3    2.67    0.24 
  -1   7  -3    2.22    0.29 
  -1   7  -3    3.12    0.32 
  -1   7  -3    2.51    0.26 
   2  -7   3   19.58    0.83 
  -2  -7  -3   21.90    0.83 
  -2  -7  -3   20.09    0.63 
   2  -7   3   21.13    0.65 
  -2  -7  -3   20.66    0.58 
   2   7   3   19.55    0.63 
  -2   7  -3   20.40    0.75 
   2   7   3   20.28    0.82 
  -2   7  -3   20.45    0.66 
  -2   7  -3   20.42    0.83 
   2   7   3   20.31    0.55 
  -3  -7  -3  136.46    3.14 
  -3  -7  -3  141.76    3.21 
   3  -7   3  135.51    3.46 
   3  -7   3  133.91    3.21 
  -3  -7  -3  130.59    3.39 
   3   7   3  133.88    3.19 
   3   7   3  138.71    3.12 
   3   7   3  137.82    3.39 
  -3   7  -3  135.77    3.45 
  -3   7  -3  136.47    3.23 
  -3   7  -3  133.81    3.32 
  -4  -7  -3   -0.55    0.26 
  -4  -7  -3    0.25    0.19 
  -4  -7  -3    0.30    0.17 
   4  -7   3    0.06    0.15 
  -4  -7  -3   -0.09    0.15 
  -4   7  -3    0.20    0.20 
  -4   7  -3    0.25    0.30 
   4   7   3   -0.03    0.23 
  -4   7  -3    0.16    0.21 
   4   7   3    0.22    0.15 
   4   7   3    0.03    0.15 
  -5  -7  -3    7.77    0.40 
   5  -7   3    7.99    0.61 
  -5  -7  -3    7.89    0.48 
  -5  -7  -3    7.56    0.40 
   5  -7   3    7.47    0.42 
   5   7   3    7.72    0.41 
   5   7   3    7.73    0.41 
  -5   7  -3    7.78    0.51 
  -5   7  -3    7.62    0.49 
   5   7   3    7.05    0.55 
  -5   7  -3    7.59    0.43 
  -6  -7  -3   -0.48    0.32 
  -6  -7  -3    1.09    0.24 
   6  -7   3    0.47    0.23 
  -6  -7  -3    1.26    0.35 
   6  -7   3    0.61    0.43 
  -6   7  -3    0.52    0.25 
   6   7   3    0.72    0.27 
   6   7   3    0.66    0.23 
   6   7   3    0.39    0.29 
  -6   7  -3    0.13    0.28 
  -6   7  -3    0.37    0.41 
  -6   7  -3    0.63    0.29 
   6   7   3    1.21    0.39 
  -7  -7  -3    0.12    0.26 
  -7  -7  -3    0.21    0.47 
  -7  -7  -3   -0.03    0.42 
   7  -7   3   -0.25    0.24 
   7  -7   3   -0.42    0.51 
  -7  -7  -3    0.04    0.27 
  -7   7  -3    0.03    0.28 
  -7   7  -3   -0.80    0.51 
   7   7   3    0.38    0.45 
  -7   7  -3    0.15    0.39 
   7   7   3    0.10    0.30 
   7   7   3    0.17    0.35 
  -7   7  -3    0.12    0.24 
   7   7   3    0.46    0.27 
  -7  -8   3    0.89    0.49 
   7  -8  -3    0.91    0.70 
  -7  -8   3    1.04    0.65 
   7  -8  -3    0.96    0.36 
  -7  -8   3   -0.32    0.23 
  -7  -8   3    1.14    0.37 
   7   8  -3    0.67    0.40 
  -7   8   3   -0.25    0.50 
  -7   8   3    0.14    0.26 
   7   8  -3    1.40    0.50 
   7   8  -3   -0.09    0.45 
  -7   8   3    0.65    0.32 
   7   8  -3    0.97    0.38 
  -7   8   3    1.08    0.69 
  -6  -8   3    0.07    0.50 
   6  -8  -3    3.18    0.64 
   6  -8  -3    1.88    0.32 
  -6  -8   3    1.53    0.32 
  -6  -8   3    1.92    0.38 
   6   8  -3    2.05    0.34 
  -6   8   3    1.63    0.56 
  -6   8   3    2.17    0.46 
   6   8  -3    2.81    0.48 
   6   8  -3    1.44    0.43 
   6   8  -3    2.21    0.34 
  -5  -8   3    0.21    0.28 
   5  -8  -3    0.16    0.41 
  -5  -8   3    0.15    0.23 
  -5  -8   3    0.38    0.43 
   5  -8  -3    0.60    0.24 
   5   8  -3    0.22    0.33 
  -5   8   3    1.11    0.43 
   5   8  -3    0.56    0.23 
  -5   8   3    0.09    0.30 
  -5   8   3    0.69    0.28 
   5   8  -3    0.35    0.23 
   5   8  -3    0.15    0.35 
  -4  -8   3    2.19    0.45 
   4  -8  -3    1.32    0.35 
  -4  -8   3    1.59    0.19 
   4  -8  -3    1.57    0.24 
   4   8  -3    1.75    0.22 
   4   8  -3    1.74    0.25 
  -4   8   3    2.08    0.33 
  -4   8   3    2.22    0.31 
   4   8  -3    2.30    0.40 
   4   8  -3    2.04    0.38 
   3  -8  -3    0.42    0.27 
   3  -8  -3   -0.06    0.16 
  -3  -8   3   -0.23    0.16 
  -3  -8   3    0.08    0.33 
  -3   8   3    0.14    0.22 
   3   8  -3    0.21    0.30 
  -3   8   3   -0.48    0.31 
   3   8  -3    0.30    0.16 
   3   8  -3    0.59    0.45 
  -3   8   3    0.43    0.23 
  -2  -8   3    0.17    0.14 
   2  -8  -3    0.26    0.26 
  -2  -8   3    0.23    0.15 
   2  -8  -3    0.11    0.16 
  -2  -8   3   -0.08    0.27 
  -2   8   3   -0.03    0.21 
   2   8  -3    0.08    0.13 
  -2   8   3   -0.31    0.17 
   2   8  -3    0.27    0.27 
   2   8  -3    0.38    0.22 
  -2   8   3    0.06    0.32 
   2   8  -3    0.19    0.17 
  -1  -8   3    2.79    0.21 
  -1  -8   3    2.85    0.29 
   1  -8  -3    3.21    0.21 
   1  -8  -3    2.92    0.38 
  -1  -8   3    3.36    0.41 
   1  -8  -3    2.67    0.28 
  -1   8   3    3.34    0.37 
   1   8  -3    2.43    0.38 
   1   8  -3    2.48    0.32 
   1   8  -3    3.02    0.31 
  -1   8   3    3.29    0.43 
  -1   8   3    3.32    0.31 
   0  -8   3   16.66    0.50 
   0  -8  -3   16.42    0.57 
   0  -8   3   16.61    0.81 
   0  -8  -3   17.22    0.49 
   0  -8   3   16.86    0.59 
   0  -8  -3   16.39    0.79 
   0   8  -3   15.82    0.78 
   0   8  -3   16.74    0.60 
   0   8   3   16.70    0.60 
   0   8   3   16.41    0.82 
   0   8  -3   16.49    0.71 
  -1  -8  -3   28.01    0.74 
   1  -8   3   28.73    1.07 
  -1  -8  -3   27.11    0.83 
   1  -8   3   28.50    0.85 
  -1  -8  -3   28.30    1.06 
   1  -8   3   29.39    0.75 
   1   8   3   26.31    1.04 
  -1   8  -3   28.76    0.99 
  -1   8  -3   28.24    1.05 
   1   8   3   28.24    0.85 
  -1   8  -3   27.26    0.85 
  -2  -8  -3    1.87    0.35 
   2  -8   3    2.17    0.38 
  -2  -8  -3    2.08    0.20 
   2  -8   3    2.05    0.24 
   2   8   3    1.95    0.17 
   2   8   3    2.25    0.38 
  -2   8  -3    1.86    0.24 
  -2   8  -3    2.04    0.31 
   2   8   3    2.18    0.24 
   3  -8   3    0.89    0.29 
  -3  -8  -3    0.48    0.18 
  -3  -8  -3    0.45    0.30 
   3  -8   3    0.50    0.17 
  -3  -8  -3    0.30    0.17 
   3   8   3    0.39    0.31 
  -3   8  -3    0.64    0.23 
   3   8   3    0.33    0.16 
  -3   8  -3    0.99    0.28 
  -4  -8  -3    5.94    0.43 
  -4  -8  -3    6.73    0.64 
  -4  -8  -3    6.00    0.35 
   4  -8   3    6.00    0.43 
   4  -8   3    5.96    0.59 
   4   8   3    6.52    0.54 
  -4   8  -3    6.83    0.53 
   4   8   3    5.42    0.58 
   4   8   3    6.27    0.40 
  -4   8  -3    6.00    0.47 
  -5  -8  -3    0.25    0.36 
  -5  -8  -3   -0.03    0.18 
   5  -8   3    0.28    0.33 
   5  -8   3    0.16    0.22 
  -5  -8  -3   -0.03    0.21 
  -5  -8  -3    0.00    0.33 
  -5   8  -3    0.19    0.26 
  -5   8  -3   -0.38    0.40 
   5   8   3    0.26    0.22 
   5   8   3    1.11    0.40 
   5   8   3    0.17    0.23 
   5   8   3   -0.43    0.33 
  -5   8  -3    0.28    0.29 
   6  -8   3   -0.76    0.51 
   6  -8   3    0.36    0.28 
  -6  -8  -3    1.11    0.45 
  -6  -8  -3    0.77    0.26 
  -6  -8  -3    0.41    0.37 
  -6  -8  -3    0.74    0.27 
  -6   8  -3    0.44    0.31 
  -6   8  -3    0.62    0.31 
   6   8   3    0.76    0.30 
   6   8   3    0.94    0.27 
   6   8   3    0.70    0.48 
  -6   8  -3    0.12    0.35 
  -6   8  -3    0.00    0.48 
   6   8   3   -0.05    0.34 
  -7  -8  -3    0.18    0.33 
  -7  -8  -3    0.32    0.56 
   7  -8   3   -0.66    0.31 
   7  -8   3   -0.36    0.68 
  -7  -8  -3   -0.12    0.29 
  -7   8  -3    0.55    0.33 
   7   8   3    0.22    0.40 
  -7   8  -3   -0.27    0.31 
  -7   8  -3   -0.89    0.46 
  -7   8  -3    0.17    0.63 
   7   8   3    0.07    0.31 
   7   8   3   -0.22    0.57 
   7   8   3   -0.72    0.37 
  -7  -9   3   -0.11    0.27 
   7  -9  -3    1.44    0.43 
   7  -9  -3    2.13    0.86 
  -7  -9   3    0.84    0.77 
   7   9  -3    1.22    0.63 
   7   9  -3    0.06    0.56 
  -7   9   3    0.55    0.33 
   7   9  -3    0.78    0.45 
   7   9  -3    1.05    0.45 
  -6  -9   3    1.08    0.38 
   6  -9  -3    1.72    0.38 
   6  -9  -3    1.22    0.67 
  -6  -9   3    0.22    0.22 
  -6  -9   3   -0.11    0.62 
  -6  -9   3    0.81    0.42 
   6   9  -3    1.58    0.38 
  -6   9   3    0.26    0.33 
   6   9  -3    2.23    0.53 
   6   9  -3    0.97    0.54 
  -6   9   3    1.62    0.64 
  -6   9   3    1.56    0.57 
   6   9  -3    2.03    0.38 
   5  -9  -3    1.06    0.31 
  -5  -9   3    0.83    0.54 
  -5  -9   3    0.58    0.21 
  -5  -9   3    0.89    0.29 
  -5  -9   3    0.60    0.32 
   5  -9  -3    0.15    0.52 
  -5   9   3    0.76    0.34 
  -5   9   3    0.84    0.40 
   5   9  -3    0.90    0.44 
  -5   9   3    1.71    0.56 
   5   9  -3    0.57    0.26 
   5   9  -3    0.00    0.38 
   5   9  -3    0.52    0.28 
  -4  -9   3    2.83    0.24 
  -4  -9   3    3.11    0.33 
   4  -9  -3    2.88    0.46 
   4  -9  -3    3.96    0.42 
  -4  -9   3    3.73    0.37 
  -4  -9   3    3.28    0.55 
   4   9  -3    3.69    0.46 
   4   9  -3    3.15    0.34 
  -4   9   3    3.49    0.42 
   4   9  -3    3.07    0.49 
   4   9  -3    3.18    0.28 
  -4   9   3    3.79    0.42 
   3  -9  -3    0.15    0.32 
  -3  -9   3    0.50    0.40 
   3  -9  -3    0.39    0.26 
   3   9  -3    0.84    0.38 
  -3   9   3    0.29    0.39 
  -3   9   3    0.83    0.29 
   3   9  -3    0.43    0.17 
   3   9  -3    0.51    0.22 
   3   9  -3    0.42    0.26 
   2  -9  -3    0.56    0.25 
  -2  -9   3    0.62    0.19 
   2  -9  -3    0.92    0.16 
  -2  -9   3    0.35    0.35 
  -2  -9   3    0.95    0.21 
   2   9  -3    0.53    0.21 
  -2   9   3    0.94    0.38 
   2   9  -3    0.83    0.27 
  -2   9   3    0.87    0.26 
   2   9  -3    1.48    0.38 
  -2   9   3    1.58    0.42 
  -1  -9   3    0.39    0.18 
   1  -9  -3    0.99    0.32 
  -1  -9   3    0.77    0.18 
   1  -9  -3    0.72    0.20 
  -1  -9   3    0.66    0.34 
  -1   9   3    0.73    0.22 
   1   9  -3    0.52    0.21 
  -1   9   3    0.42    0.27 
   1   9  -3    0.46    0.34 
  -1   9   3    0.68    0.40 
   0  -9   3    2.89    0.47 
   0  -9   3    2.87    0.29 
   0  -9  -3    2.11    0.40 
   0  -9  -3    2.21    0.19 
   0  -9  -3    2.33    0.25 
   0   9  -3    2.52    0.36 
   0   9   3    2.20    0.28 
   0   9   3    2.79    0.34 
   0   9   3    1.87    0.43 
   0   9  -3    2.61    0.29 
  -1  -9  -3    0.36    0.34 
   1  -9   3   -0.07    0.18 
  -1  -9  -3   -0.01    0.15 
  -1   9  -3    0.07    0.24 
   1   9   3    0.03    0.30 
   1   9   3   -0.04    0.17 
  -1   9  -3   -0.03    0.19 
  -1   9  -3    0.06    0.31 
  -2  -9  -3    0.14    0.20 
   2  -9   3    0.57    0.21 
  -2  -9  -3    0.15    0.33 
   2  -9   3    0.34    0.30 
   2   9   3    0.72    0.36 
   2   9   3    0.30    0.20 
  -2   9  -3    0.41    0.25 
   2   9   3    0.10    0.26 
  -2   9  -3    0.28    0.22 
   3  -9   3   12.24    0.56 
  -3  -9  -3   10.09    0.78 
  -3  -9  -3   12.24    0.51 
   3  -9   3   11.84    0.78 
   3   9   3   10.45    0.50 
   3   9   3   11.49    0.54 
   3   9   3   11.21    0.75 
  -3   9  -3   12.09    0.70 
   3   9   3   10.88    0.77 
  -3   9  -3   12.14    0.60 
  -4  -9  -3   -0.16    0.20 
  -4  -9  -3    0.25    0.40 
  -4  -9  -3   -0.08    0.19 
   4  -9   3    0.58    0.24 
   4  -9   3   -0.47    0.32 
  -4   9  -3    0.29    0.31 
  -4   9  -3   -0.48    0.40 
   4   9   3    0.03    0.21 
  -4   9  -3    0.01    0.28 
   4   9   3   -0.06    0.23 
   4   9   3    0.49    0.39 
   4   9   3   -0.73    0.35 
  -5  -9  -3    0.47    0.32 
  -5  -9  -3    0.48    0.44 
  -5  -9  -3    0.92    0.26 
   5  -9   3    0.87    0.27 
   5  -9   3    0.70    0.44 
  -5  -9  -3    1.13    0.26 
   5   9   3    1.82    0.47 
  -5   9  -3    0.68    0.47 
   5   9   3    0.75    0.28 
  -5   9  -3    0.74    0.35 
  -5   9  -3    0.69    0.36 
   5   9   3    0.86    0.29 
   5   9   3    1.71    0.48 
  -6  -9  -3   -0.91    0.52 
   6  -9   3    0.14    0.31 
  -6  -9  -3    0.05    0.27 
  -6  -9  -3   -0.10    0.30 
   6  -9   3   -0.67    0.58 
  -6  -9  -3   -0.15    0.44 
  -6   9  -3    0.12    0.63 
   6   9   3   -0.13    0.44 
   6   9   3    0.09    0.33 
  -6   9  -3   -0.46    0.39 
   6   9   3   -0.11    0.55 
  -6   9  -3   -0.01    0.28 
  -6   9  -3    0.22    0.44 
   6   9   3    0.06    0.32 
  -6 -10   3   -0.16    0.25 
   6 -10  -3    0.75    0.42 
   6 -10  -3   -0.78    0.75 
  -6 -10   3   -0.56    0.73 
  -6  10   3    0.77    0.61 
  -6  10   3   -0.39    0.44 
   6  10  -3    0.71    0.64 
   6  10  -3    1.16    0.46 
   6  10  -3    0.40    0.39 
  -5 -10   3    1.88    0.42 
   5 -10  -3    1.78    0.70 
  -5 -10   3    2.15    0.41 
  -5 -10   3    2.25    0.72 
   5 -10  -3    2.08    0.40 
  -5 -10   3    1.34    0.25 
   5  10  -3    2.40    0.36 
  -5  10   3    2.28    0.70 
   5  10  -3    2.38    0.41 
   5  10  -3    3.00    0.59 
  -5  10   3    1.85    0.44 
  -5  10   3    2.74    0.53 
   4 -10  -3    1.90    0.50 
  -4 -10   3    1.27    0.56 
  -4 -10   3    0.91    0.29 
   4 -10  -3    1.10    0.33 
  -4 -10   3    1.20    0.35 
  -4  10   3    1.35    0.41 
   4  10  -3    1.50    0.88 
   4  10  -3    0.61    0.41 
   4  10  -3    1.08    0.25 
   4  10  -3    1.39    0.34 
  -4  10   3    0.81    0.51 
  -3 -10   3   -0.04    0.44 
   3 -10  -3   -0.15    0.23 
  -3 -10   3   -0.05    0.23 
   3 -10  -3   -0.11    0.38 
  -3 -10   3    0.18    0.26 
   3  10  -3    0.12    0.25 
  -3  10   3    0.37    0.49 
   3  10  -3    0.11    0.20 
  -3  10   3   -0.13    0.31 
   3  10  -3    0.01    0.34 
   3  10  -3    0.11    0.41 
  -2 -10   3    1.08    0.24 
  -2 -10   3    0.91    0.48 
   2 -10  -3    0.74    0.41 
   2 -10  -3    1.28    0.26 
  -2 -10   3    1.16    0.27 
   2  10  -3    0.97    0.46 
  -2  10   3    1.72    0.54 
   2  10  -3    1.08    0.33 
  -2  10   3    0.95    0.31 
   2  10  -3    0.99    0.28 
   1 -10  -3    0.00    0.39 
  -1 -10   3    0.40    0.23 
  -1 -10   3    0.18    0.42 
  -1 -10   3    0.17    0.19 
   1 -10  -3    0.00    0.19 
  -1  10   3    0.51    0.40 
  -1  10   3    0.06    0.26 
   1  10  -3    0.29    0.24 
   1  10  -3    0.60    0.39 
   0 -10  -3    0.22    0.20 
   0 -10  -3    0.41    0.20 
   0 -10  -3    0.07    0.35 
   0 -10   3    0.12    0.31 
   0 -10   3   -0.01    0.21 
   0 -10   3    0.20    0.37 
   0  10  -3    0.25    0.24 
   0  10  -3   -0.01    0.39 
   0  10  -3   -0.35    0.39 
   0  10   3    0.35    0.41 
   0  10   3    0.04    0.24 
   1 -10   3    7.66    0.79 
  -1 -10  -3    6.11    0.44 
   1 -10   3    8.41    0.49 
  -1 -10  -3    8.25    0.78 
  -1  10  -3    8.63    0.81 
   1  10   3    6.83    0.49 
   1  10   3    7.42    0.76 
   2 -10   3    1.01    0.27 
   2 -10   3    1.32    0.43 
  -2 -10  -3    0.91    0.41 
  -2  10  -3    0.45    0.40 
   2  10   3    1.55    0.50 
  -2  10  -3    0.86    0.31 
   2  10   3    0.70    0.26 
   2  10   3    1.43    0.37 
  -3 -10  -3    2.06    0.29 
   3 -10   3    1.72    0.45 
  -3 -10  -3    2.91    0.58 
   3 -10   3    1.48    0.22 
  -3 -10  -3    2.09    0.30 
   3 -10   3    2.21    0.32 
  -3  10  -3    2.20    0.37 
   3  10   3    2.44    0.33 
   3  10   3    2.21    0.44 
   3  10   3    2.32    0.49 
  -3  10  -3    2.01    0.48 
   4 -10   3    0.02    0.41 
  -4 -10  -3   -0.55    0.48 
  -4 -10  -3    0.23    0.31 
  -4 -10  -3    0.10    0.27 
  -4 -10  -3    0.02    0.23 
   4  10   3    0.64    0.47 
  -4  10  -3    0.15    0.37 
   4  10   3   -0.50    0.45 
  -4  10  -3   -0.34    0.47 
   4  10   3    0.19    0.28 
   4  10   3    0.12    0.24 
  -5 -10  -3    2.16    0.38 
   5 -10   3    3.09    0.58 
  -5 -10  -3    2.61    0.33 
  -5 -10  -3    2.63    0.44 
  -5  10  -3    2.67    0.68 
   5  10   3    2.60    0.36 
   5  10   3    2.69    0.40 
   5  10   3    2.93    0.60 
  -5  10  -3    1.64    0.60 
   5  10   3    2.98    0.63 
  -6 -10  -3   -0.39    0.41 
  -6 -10  -3    0.32    0.58 
   6 -10   3    1.77    0.75 
  -6 -10  -3    0.19    0.31 
  -6  10  -3    0.51    0.55 
  -6  10  -3    0.09    0.34 
   6  10   3   -0.07    0.39 
   6  10   3    0.20    0.60 
   6  10   3    0.19    0.39 
   6  10   3   -0.33    0.69 
  -5 -11   3    0.00    0.79 
  -5 -11   3   -0.07    0.25 
   5 -11  -3    1.01    0.78 
   5 -11  -3    0.90    0.45 
   5  11  -3    0.80    0.74 
  -5  11   3    1.72    0.50 
   5  11  -3    0.70    0.39 
   5  11  -3    2.26    0.69 
   5  11  -3    0.88    0.43 
  -5  11   3    0.94    0.57 
  -4 -11   3   -0.02    0.33 
  -4 -11   3    0.24    0.41 
   4 -11  -3   -0.28    0.34 
   4 -11  -3   -0.36    0.54 
  -4 -11   3   -0.40    0.65 
  -4  11   3    0.71    0.51 
  -4  11   3   -0.84    0.68 
   4  11  -3    0.51    0.66 
  -4  11   3   -0.10    0.45 
   4  11  -3    0.27    0.30 
   4  11  -3    0.50    0.36 
   4  11  -3    0.80    0.52 
  -3 -11   3   -0.09    0.29 
  -3 -11   3    0.51    0.59 
   3 -11  -3    0.24    0.33 
   3 -11  -3    0.04    0.24 
  -3 -11   3    0.27    0.33 
   3 -11  -3    0.56    0.49 
  -3  11   3    0.42    0.40 
  -3  11   3    1.04    0.45 
  -3  11   3    0.94    0.65 
   3  11  -3    0.13    0.44 
   3  11  -3   -0.06    0.32 
   3  11  -3    0.12    0.50 
  -2 -11   3    0.00    0.29 
   2 -11  -3   -0.09    0.48 
   2 -11  -3   -0.67    0.25 
  -2 -11   3    0.56    0.53 
   2 -11  -3    0.37    0.22 
  -2 -11   3    0.09    0.25 
  -2  11   3   -0.22    0.35 
   2  11  -3    0.25    0.30 
   2  11  -3    0.13    0.37 
  -2  11   3    0.35    0.39 
  -2  11   3    0.00    0.55 
   2  11  -3   -0.24    0.50 
   1 -11  -3    0.60    0.27 
   1 -11  -3    0.29    0.21 
  -1 -11   3    0.28    0.26 
   1 -11  -3    0.72    0.48 
  -1 -11   3    0.28    0.26 
  -1 -11   3    0.13    0.52 
   1  11  -3   -0.31    0.50 
  -1  11   3    0.70    0.40 
  -1  11   3    0.55    0.33 
   1  11  -3    0.70    0.33 
  -1  11   3    0.20    0.54 
   1  11  -3    0.63    0.40 
   0 -11   3    1.96    0.32 
   0 -11  -3    1.98    0.52 
   0 -11   3    2.06    0.28 
   0 -11   3    2.42    0.59 
   0 -11  -3    2.02    0.26 
   0 -11  -3    2.96    0.35 
   0  11   3    1.88    0.56 
   0  11  -3    2.17    0.59 
   0  11  -3    2.73    0.51 
   0  11   3    2.39    0.37 
   0  11  -3    1.60    0.35 
   0  11   3    2.32    0.45 
  -1 -11  -3    0.41    0.28 
   1 -11   3    0.16    0.48 
  -1 -11  -3    0.19    0.48 
   1 -11   3    0.64    0.24 
   1 -11   3    0.91    0.28 
  -1 -11  -3    0.48    0.25 
   1  11   3    0.39    0.51 
   1  11   3    0.53    0.38 
  -1  11  -3    0.52    0.55 
   1  11   3    0.20    0.28 
  -1  11  -3    0.98    0.45 
  -1  11  -3    0.48    0.33 
  -2 -11  -3    0.07    0.28 
   2 -11   3    0.23    0.29 
  -2 -11  -3    0.42    0.52 
   2 -11   3    0.40    0.49 
   2 -11   3    0.18    0.22 
  -2 -11  -3   -0.31    0.24 
   2  11   3    0.06    0.27 
   2  11   3    0.44    0.57 
   2  11   3    0.28    0.41 
  -2  11  -3    0.31    0.50 
  -2  11  -3    0.04    0.36 
  -2  11  -3    0.22    0.42 
  -3 -11  -3    1.89    0.36 
   3 -11   3    1.52    0.28 
  -3 -11  -3    2.01    0.32 
   3 -11   3    2.39    0.50 
  -3 -11  -3    2.05    0.60 
   3 -11   3    1.93    0.38 
   3  11   3    1.85    0.70 
  -3  11  -3    2.27    0.52 
   3  11   3    2.84    0.54 
  -3  11  -3    2.53    0.61 
   3  11   3    2.11    0.38 
  -3  11  -3    1.88    0.44 
   4 -11   3   -0.58    0.51 
  -4 -11  -3    0.13    0.38 
  -4 -11  -3    0.06    0.27 
  -4 -11  -3   -0.02    0.57 
  -4 -11  -3    0.28    0.32 
   4 -11   3    0.07    0.36 
   4 -11   3    0.17    0.27 
  -4  11  -3    0.31    0.59 
   4  11   3    0.38    0.29 
   4  11   3    1.00    0.56 
   4  11   3    0.08    0.38 
   4  11   3   -1.23    0.58 
  -4  11  -3    0.55    0.48 
  -4  11  -3    0.30    0.45 
  -5 -11  -3    0.21    0.50 
  -5 -11  -3   -0.83    0.71 
   5 -11   3   -0.81    0.59 
  -5 -11  -3   -0.31    0.30 
   5 -11   3    0.42    0.45 
   5  11   3    1.13    0.73 
  -5  11  -3    0.03    0.54 
   5  11   3    0.21    0.43 
  -5  11  -3    0.87    0.56 
   5  11   3   -0.06    0.67 
   5  11   3    0.23    0.36 
   4 -12  -3    2.95    0.54 
  -4 -12   3    4.57    0.93 
   4 -12  -3    2.31    0.78 
   4  12  -3    4.09    0.57 
   4  12  -3    5.25    0.87 
  -4  12   3    2.50    0.64 
  -4  12   3    4.52    0.74 
   3 -12  -3    0.60    0.41 
   3 -12  -3   -0.23    0.59 
  -3 -12   3    0.44    0.39 
  -3 -12   3    0.10    0.74 
  -3 -12   3    0.45    0.43 
   3 -12  -3    0.72    0.31 
  -3  12   3    0.07    0.54 
   3  12  -3    0.64    0.43 
   3  12  -3    1.21    0.59 
  -3  12   3   -0.96    0.79 
  -3  12   3    0.79    0.55 
   3  12  -3    1.00    0.69 
   2 -12  -3   -0.92    0.51 
  -2 -12   3   -0.52    0.68 
   2 -12  -3    0.20    0.35 
  -2 -12   3    0.13    0.36 
   2 -12  -3    0.02    0.29 
  -2 -12   3    0.07    0.35 
   2  12  -3    1.02    0.51 
   2  12  -3   -1.17    0.59 
  -2  12   3    0.35    0.46 
   2  12  -3    0.22    0.40 
  -2  12   3    0.53    0.53 
  -2  12   3   -1.23    0.69 
   1 -12  -3   -0.42    0.55 
  -1 -12   3   -0.16    0.32 
  -1 -12   3    0.77    0.66 
  -1 -12   3   -0.09    0.32 
   1 -12  -3   -0.35    0.28 
   1 -12  -3   -0.38    0.33 
   1  12  -3    0.74    0.50 
  -1  12   3   -0.18    0.63 
  -1  12   3    0.60    0.43 
   1  12  -3    0.49    0.41 
   1  12  -3   -0.24    0.60 
  -1  12   3   -0.41    0.48 
   0 -12  -3    0.04    0.32 
   0 -12   3   -0.05    0.29 
   0 -12   3   -0.29    0.37 
   0 -12  -3    0.22    0.32 
   0 -12   3   -0.85    0.55 
   0 -12  -3    0.22    0.58 
   0  12  -3    0.65    0.47 
   0  12   3   -0.33    0.59 
   0  12  -3   -0.13    0.39 
   0  12  -3   -0.41    0.62 
   0  12   3    0.33    0.38 
   0  12   3    0.66    0.45 
  -1 -12  -3    0.14    0.32 
  -1 -12  -3    0.08    0.31 
   1 -12   3    0.04    0.38 
  -1 -12  -3    0.94    0.60 
   1 -12   3    0.68    0.62 
   1 -12   3    0.01    0.28 
  -1  12  -3    0.04    0.49 
   1  12   3   -0.06    0.62 
  -1  12  -3    0.63    0.66 
   1  12   3   -0.14    0.50 
   1  12   3    0.02    0.36 
  -1  12  -3    0.70    0.41 
   2 -12   3    0.60    0.41 
  -2 -12  -3   -0.67    0.30 
  -2 -12  -3    0.09    0.62 
  -2 -12  -3    0.00    0.37 
   2 -12   3    0.17    0.30 
   2 -12   3    0.71    0.64 
  -2  12  -3    0.29    0.45 
   2  12   3    0.18    0.68 
  -2  12  -3   -0.30    0.51 
   2  12   3    0.26    0.38 
  -2  12  -3    0.46    0.69 
   2  12   3   -0.50    0.47 
   3 -12   3    0.52    0.64 
  -3 -12  -3    1.55    0.45 
  -3 -12  -3    1.88    0.77 
   3 -12   3    1.41    0.46 
   3  12   3    0.90    0.41 
  -3  12  -3    2.15    0.56 
   3  12   3    1.65    0.70 
   3  12   3    0.37    0.62 
  -3  12  -3    1.86    0.63 
  -4 -12  -3    0.69    0.33 
  -4 -12  -3    0.53    0.52 
   4 -12   3   -0.09    0.68 
   4 -12   3   -0.16    0.47 
  -4  12  -3    1.51    0.63 
   4  12   3    0.39    0.46 
   4  12   3   -1.22    0.73 
  -4  12  -3    0.90    0.69 
   2 -13  -3   -0.01    0.50 
  -2 -13   3    0.42    0.83 
   2 -13  -3   -0.78    0.72 
  -2  13   3    0.15    0.55 
   2  13  -3   -0.31    0.49 
   2  13  -3   -1.28    0.84 
   1 -13  -3    0.00    0.40 
   1 -13  -3   -0.28    0.71 
  -1 -13   3   -1.27    0.80 
   1 -13  -3    0.20    0.47 
  -1  13   3   -0.03    0.80 
   1  13  -3    0.02    0.48 
  -1  13   3   -0.21    0.53 
   1  13  -3    1.46    0.84 
   0 -13   3    0.29    0.43 
   0 -13  -3   -0.56    0.70 
   0 -13  -3    0.42    0.40 
   0 -13   3    0.13    0.75 
   0  13  -3   -0.29    0.53 
   0  13  -3    0.59    0.78 
   0  13   3   -0.04    0.49 
   0  13   3   -1.03    0.83 
   1 -13   3    1.49    0.77 
  -1 -13  -3   -0.48    0.71 
  -1 -13  -3    0.40    0.45 
   1 -13   3    0.56    0.46 
   1  13   3    0.30    0.48 
  -1  13  -3   -0.42    0.51 
   1  13   3    2.11    0.96 
   2 -13   3   -0.66    0.49 
   2 -13   3    0.12    0.78 
  -2 -13  -3    1.71    0.89 
  -2 -13  -3   -0.86    0.48 
   2  13   3   -0.84    0.83 
   2  13   3    0.43    0.50 
  -2  13  -3    0.33    0.57 
  -9   0   4    0.26    0.49 
  -9   0   4    0.93    0.51 
   9   0  -4    0.11    0.36 
   9   0  -4    0.08    0.28 
  -9   0   4   -0.17    0.26 
   9   0  -4   -0.04    0.49 
   8   0  -4   -0.02    0.22 
   8   0  -4    0.32    0.28 
  -8   0   4    0.39    0.19 
  -8   0   4    1.74    0.38 
  -8   0   4   -0.36    0.32 
   8   0  -4    0.34    0.32 
   7   0  -4   -0.18    0.24 
  -7   0   4   -0.12    0.15 
  -7   0   4    0.29    0.31 
   7   0  -4   -0.05    0.23 
   7   0  -4    0.23    0.17 
  -7   0   4    0.39    0.28 
   6   0  -4   19.64    0.63 
  -6   0   4   18.75    0.80 
   6   0  -4   18.71    0.56 
  -6   0   4   19.40    0.73 
   6   0  -4   19.05    0.63 
  -6   0   4   18.10    0.61 
   6   0  -4   19.21    0.63 
  -5   0   4    0.02    0.17 
   5   0  -4   -0.12    0.10 
   5   0  -4    0.08    0.14 
  -5   0   4    0.16    0.16 
   5   0  -4    0.02    0.12 
  -5   0   4    0.00    0.09 
   5   0  -4   -0.04    0.10 
   4   0  -4    7.95    0.32 
  -4   0   4    7.79    0.29 
   4   0  -4    8.42    0.33 
  -4   0   4    7.34    0.42 
   4   0  -4    8.00    0.31 
  -4   0   4    8.12    0.37 
   4   0  -4    8.03    0.25 
  -3   0   4   -0.07    0.04 
  -3   0   4   -0.08    0.06 
   3   0  -4    0.01    0.06 
   3   0  -4   -0.04    0.07 
  -3   0   4    0.06    0.10 
   3   0  -4   -0.05    0.03 
   3   0  -4   -0.08    0.07 
   2   0  -4    9.07    0.26 
  -2   0   4    9.76    0.32 
  -2   0   4    8.27    0.26 
  -2   0   4    9.04    0.26 
   2   0  -4    8.64    0.30 
   2   0  -4    8.64    0.25 
  -2   0   4    9.07    0.29 
  -2   0   4    8.97    0.25 
  -1   0   4   -0.23    0.06 
  -1   0   4   -0.27    0.05 
   1   0  -4   -0.23    0.03 
  -1   0   4   -0.22    0.03 
   1   0  -4   -0.27    0.05 
   1   0  -4   -0.25    0.04 
   1   0  -4   -0.04    0.06 
   0   0  -4   73.01    1.75 
   0   0   4   76.53    1.75 
   0   0   4   75.77    1.74 
   0   0  -4   75.40    1.73 
   0   0  -4   75.90    1.77 
   0   0   4   77.06    1.72 
   0   0   4   70.63    1.76 
   0   0  -4   79.05    1.72 
   0   0   4   79.63    1.71 
   0   0   4   78.49    1.71 
  -1   0  -4    0.03    0.02 
   1   0   4   -0.01    0.04 
  -1   0  -4   -0.04    0.04 
   1   0   4   -0.03    0.05 
   1   0   4    0.03    0.03 
   1   0   4   -0.04    0.03 
  -1   0  -4   -0.05    0.03 
   2   0   4   15.46    0.44 
  -2   0  -4   15.17    0.42 
   2   0   4   15.37    0.40 
  -2   0  -4   15.01    0.40 
   3   0   4    0.04    0.08 
   3   0   4   -0.05    0.06 
  -3   0  -4    0.02    0.07 
   3   0   4    0.02    0.08 
  -3   0  -4    0.03    0.07 
   4   0   4    5.44    0.15 
   4   0   4    5.33    0.14 
   4   0   4    5.44    0.26 
  -4   0  -4    5.33    0.23 
  -4   0  -4    5.04    0.25 
   4   0   4    4.89    0.24 
   4   0   4    5.45    0.28 
   5   0   4    0.04    0.04 
  -5   0  -4   -0.05    0.10 
   5   0   4    0.20    0.16 
   5   0   4    0.02    0.05 
   5   0   4   -0.02    0.10 
   6   0   4    1.66    0.18 
   6   0   4    1.57    0.12 
   6   0   4    1.20    0.23 
  -6   0  -4    1.82    0.23 
   6   0   4    1.75    0.11 
   7   0   4   -0.01    0.26 
   7   0   4    0.07    0.13 
  -7   0  -4   -0.12    0.16 
   8   0   4    2.67    0.43 
  -8   0  -4    3.33    0.39 
  -9   0  -4   -0.46    0.29 
   9   0   4   -0.74    0.55 
  -9  -1   4    0.04    0.51 
  -9  -1   4   -0.47    0.28 
  -9  -1   4    0.44    0.49 
   9  -1  -4   -0.05    0.28 
   9  -1  -4    0.46    0.39 
   9  -1  -4    0.35    0.48 
  -9   1   4    0.49    0.52 
   9   1  -4    0.34    0.35 
  -9   1   4   -0.36    0.49 
   9   1  -4   -0.27    0.30 
   9   1  -4   -0.21    0.47 
  -9   1   4    0.26    0.28 
   8  -1  -4    1.39    0.39 
  -8  -1   4    1.48    0.24 
  -8  -1   4    1.88    0.46 
   8  -1  -4    1.35    0.25 
  -8  -1   4    0.29    0.37 
   8  -1  -4    1.53    0.31 
   8   1  -4    1.29    0.27 
   8   1  -4    1.31    0.35 
  -8   1   4    0.19    0.37 
   8   1  -4    1.31    0.29 
  -8   1   4    2.21    0.42 
   7  -1  -4   10.92    0.56 
   7  -1  -4   11.68    0.50 
  -7  -1   4   11.62    0.49 
  -7  -1   4    9.80    0.64 
  -7  -1   4   13.31    0.76 
   7  -1  -4   12.47    0.54 
   7   1  -4   11.70    0.53 
   7   1  -4   11.77    0.51 
   7   1  -4   11.09    0.58 
  -7   1   4   12.58    0.51 
   7   1  -4   10.77    0.50 
  -7   1   4   10.98    0.66 
  -7   1   4   12.75    0.66 
  -6  -1   4    6.28    0.47 
   6  -1  -4    6.02    0.34 
   6  -1  -4    6.69    0.40 
  -6  -1   4    6.10    0.32 
   6  -1  -4    6.66    0.39 
  -6  -1   4    6.52    0.51 
   6  -1  -4    6.53    0.35 
   6   1  -4    6.63    0.36 
   6   1  -4    5.78    0.36 
   6   1  -4    6.81    0.37 
  -6   1   4    6.78    0.47 
  -6   1   4    5.96    0.34 
  -6   1   4    5.72    0.51 
   6   1  -4    6.24    0.31 
   5  -1  -4    1.08    0.15 
  -5  -1   4    1.28    0.22 
   5  -1  -4    0.96    0.15 
  -5  -1   4    1.04    0.23 
   5  -1  -4    1.04    0.17 
  -5  -1   4    0.87    0.15 
   5  -1  -4    1.43    0.19 
  -5   1   4    0.77    0.19 
   5   1  -4    0.94    0.16 
   5   1  -4    1.13    0.12 
   5   1  -4    1.12    0.09 
   5   1  -4    0.98    0.16 
   5   1  -4    0.76    0.15 
  -5   1   4    0.68    0.20 
  -5   1   4    0.88    0.15 
  -4  -1   4   38.74    1.02 
  -4  -1   4   39.39    1.01 
   4  -1  -4   39.65    1.02 
  -4  -1   4   40.67    1.04 
  -4  -1   4   42.83    1.12 
   4  -1  -4   41.65    1.05 
   4  -1  -4   40.15    1.05 
   4   1  -4   40.08    0.97 
  -4   1   4   41.92    1.09 
   4   1  -4   40.93    0.95 
  -4   1   4   39.53    1.01 
  -4   1   4   40.49    1.19 
   4   1  -4   41.12    1.04 
   4   1  -4   40.40    1.07 
   4   1  -4   40.58    1.01 
  -3  -1   4    0.07    0.11 
   3  -1  -4    0.02    0.07 
  -3  -1   4    0.03    0.07 
   3  -1  -4    0.07    0.09 
  -3  -1   4    0.01    0.05 
   3  -1  -4    0.00    0.09 
  -3  -1   4    0.10    0.08 
  -3  -1   4   -0.01    0.06 
   3   1  -4    0.05    0.05 
  -3   1   4    0.01    0.10 
   3   1  -4    0.03    0.08 
   3   1  -4   -0.07    0.07 
   3   1  -4    0.02    0.04 
  -3   1   4    0.02    0.11 
   3   1  -4    0.17    0.08 
  -3   1   4    0.00    0.04 
  -3   1   4   -0.03    0.07 
  -2  -1   4  111.03    2.50 
   2  -1  -4  113.58    2.51 
  -2  -1   4  105.16    2.54 
  -2  -1   4  110.55    2.45 
  -2  -1   4  106.91    2.49 
  -2  -1   4  104.60    2.46 
   2  -1  -4  111.57    2.51 
   2   1  -4  106.75    2.46 
  -2   1   4  104.96    2.60 
  -2   1   4  103.88    2.52 
  -2   1   4  108.43    2.46 
   2   1  -4  111.03    2.41 
   2   1  -4  109.80    2.49 
   2   1  -4  108.09    2.45 
   2   1  -4  112.95    2.50 
   2   1  -4  104.99    2.53 
  -1  -1   4   28.04    0.71 
   1  -1  -4   27.91    0.68 
  -1  -1   4   26.36    0.69 
  -1  -1   4   25.96    0.63 
  -1  -1   4   26.33    0.67 
  -1  -1   4   27.69    0.61 
   1  -1  -4   27.03    0.75 
   1   1  -4   26.65    0.63 
   1   1  -4   26.64    0.70 
   1   1  -4   29.28    0.61 
   1   1  -4   26.79    0.69 
  -1   1   4   27.07    0.75 
  -1   1   4   26.36    0.68 
   1   1  -4   26.03    0.67 
   0  -1  -4    3.16    0.13 
   0  -1   4    2.94    0.16 
   0  -1   4    2.95    0.16 
   0  -1   4    3.15    0.09 
   0  -1  -4    3.15    0.18 
   0  -1   4    3.06    0.12 
   0  -1   4    3.16    0.10 
   0   1  -4    3.01    0.12 
   0   1   4    3.12    0.13 
   0   1   4    2.99    0.17 
   0   1  -4    3.13    0.10 
   0   1  -4    3.17    0.16 
   0   1  -4    3.13    0.15 
   0   1  -4    3.26    0.09 
   1  -1   4   58.56    1.40 
  -1  -1  -4   56.36    1.34 
   1  -1   4   57.91    1.34 
   1  -1   4   58.58    1.37 
  -1  -1  -4   58.38    1.32 
  -1  -1  -4   57.18    1.32 
   1  -1   4   58.20    1.33 
   1   1   4   59.89    1.34 
  -1   1  -4   56.14    1.34 
  -1   1  -4   61.85    1.35 
  -1   1  -4   58.51    1.39 
  -1   1  -4   57.71    1.36 
   1   1   4   59.25    1.33 
   1   1   4   58.48    1.32 
   2  -1   4    6.49    0.25 
  -2  -1  -4    6.28    0.21 
   2  -1   4    6.51    0.21 
  -2  -1  -4    6.71    0.23 
   2  -1   4    6.29    0.21 
   2  -1   4    6.29    0.18 
   2   1   4    6.68    0.21 
  -2   1  -4    6.25    0.20 
  -2   1  -4    6.20    0.23 
   2   1   4    6.42    0.16 
  -2   1  -4    6.54    0.22 
   2   1   4    6.24    0.20 
   2   1   4    6.31    0.17 
   3  -1   4    5.89    0.24 
  -3  -1  -4    5.39    0.22 
   3  -1   4    5.93    0.17 
   3  -1   4    5.81    0.22 
   3  -1   4    5.89    0.25 
  -3  -1  -4    5.72    0.24 
  -3   1  -4    5.63    0.20 
   3   1   4    5.88    0.22 
  -3   1  -4    5.59    0.24 
  -3   1  -4    5.79    0.17 
   3   1   4    5.50    0.22 
   4  -1   4    6.40    0.21 
  -4  -1  -4    6.25    0.29 
   4  -1   4    6.36    0.19 
  -4  -1  -4    6.32    0.26 
   4  -1   4    6.48    0.27 
   4  -1   4    6.41    0.31 
   4   1   4    6.64    0.31 
  -4   1  -4    6.64    0.29 
  -4   1  -4    6.24    0.23 
   4   1   4    6.56    0.16 
   4   1   4    6.30    0.28 
  -4   1  -4    6.38    0.20 
   4   1   4    6.19    0.17 
   4   1   4    6.17    0.27 
   5  -1   4    0.20    0.12 
   5  -1   4    0.31    0.07 
  -5  -1  -4    0.45    0.13 
   5  -1   4    0.33    0.17 
   5  -1   4    0.29    0.08 
  -5  -1  -4    0.25    0.12 
   5   1   4    0.34    0.05 
  -5   1  -4    0.61    0.14 
   5   1   4    0.39    0.13 
  -5   1  -4    0.19    0.08 
  -5   1  -4    0.38    0.10 
   5   1   4    0.39    0.05 
   5   1   4    0.50    0.16 
   6  -1   4    1.95    0.17 
  -6  -1  -4    1.98    0.24 
   6  -1   4    2.24    0.27 
   6  -1   4    2.05    0.23 
   6  -1   4    2.01    0.15 
   6   1   4    2.32    0.11 
   6   1   4    2.05    0.20 
  -6   1  -4    2.34    0.16 
  -6   1  -4    1.80    0.23 
  -6   1  -4    2.06    0.15 
   6   1   4    1.93    0.24 
  -7  -1  -4    1.48    0.25 
   7  -1   4    1.60    0.14 
   7  -1   4    1.56    0.16 
   7  -1   4    1.69    0.14 
   7  -1   4    1.50    0.32 
   7   1   4    1.42    0.29 
  -7   1  -4    1.46    0.24 
   7   1   4    1.70    0.20 
   8  -1   4    1.20    0.41 
  -8  -1  -4    1.00    0.28 
  -8   1  -4    0.96    0.29 
   8   1   4    0.61    0.39 
  -9  -1  -4    0.41    0.30 
   9  -1   4   -0.02    0.56 
  -9   1  -4   -0.33    0.29 
   9   1   4    0.17    0.52 
   9  -2  -4    1.48    0.42 
  -9  -2   4   -0.35    0.51 
  -9  -2   4    1.03    0.32 
   9  -2  -4    1.68    0.32 
  -9  -2   4    1.74    0.61 
   9  -2  -4    1.51    0.51 
   9   2  -4    1.35    0.38 
  -9   2   4    1.29    0.56 
  -9   2   4   -0.06    0.56 
  -9   2   4    1.07    0.34 
   9   2  -4    1.22    0.50 
   9   2  -4    1.46    0.35 
  -8  -2   4    4.97    0.40 
   8  -2  -4    5.55    0.55 
   8  -2  -4    5.53    0.50 
   8  -2  -4    5.48    0.43 
  -8  -2   4    4.94    0.61 
  -8   2   4    5.22    0.56 
  -8   2   4    4.86    0.51 
   8   2  -4    4.75    0.49 
   8   2  -4    4.97    0.46 
   8   2  -4    4.80    0.45 
   7  -2  -4    5.49    0.38 
  -7  -2   4    5.60    0.59 
   7  -2  -4    5.69    0.47 
  -7  -2   4    6.16    0.37 
   7  -2  -4    5.21    0.40 
   7   2  -4    5.50    0.46 
  -7   2   4    5.46    0.48 
  -7   2   4    5.01    0.36 
   7   2  -4    5.13    0.40 
   7   2  -4    5.84    0.42 
   7   2  -4    5.90    0.41 
  -6  -2   4   35.68    0.99 
  -6  -2   4   35.64    1.12 
   6  -2  -4   36.50    0.99 
   6  -2  -4   34.14    1.01 
   6  -2  -4   36.61    1.00 
   6   2  -4   33.74    1.00 
   6   2  -4   34.93    0.98 
  -6   2   4   35.61    1.07 
   6   2  -4   35.48    0.89 
  -6   2   4   34.96    0.99 
   6   2  -4   34.39    0.97 
   6   2  -4   35.59    0.87 
  -6   2   4   36.65    1.15 
  -5  -2   4    5.19    0.27 
   5  -2  -4    4.69    0.28 
   5  -2  -4    5.31    0.33 
  -5  -2   4    5.03    0.30 
  -5  -2   4    5.28    0.32 
  -5  -2   4    4.56    0.38 
   5  -2  -4    4.97    0.34 
  -5   2   4    5.28    0.36 
  -5   2   4    5.41    0.28 
  -5   2   4    5.24    0.39 
   5   2  -4    4.96    0.23 
   5   2  -4    5.32    0.30 
   5   2  -4    4.94    0.31 
   5   2  -4    5.31    0.22 
   5   2  -4    5.26    0.30 
  -4  -2   4   64.10    1.58 
  -4  -2   4   63.69    1.55 
   4  -2  -4   65.77    1.61 
  -4  -2   4   65.79    1.67 
  -4  -2   4   64.81    1.56 
   4  -2  -4   63.69    1.59 
  -4   2   4   64.66    1.47 
  -4   2   4   65.90    1.71 
   4   2  -4   64.83    1.56 
  -4   2   4   66.25    1.57 
  -4   2   4   64.58    1.47 
   4   2  -4   66.27    1.58 
   4   2  -4   62.67    1.54 
  -4   2   4   62.59    1.62 
   4   2  -4   66.59    1.48 
   4   2  -4   65.57    1.63 
  -3  -2   4   27.25    0.75 
  -3  -2   4   28.69    0.73 
  -3  -2   4   29.47    0.72 
   3  -2  -4   28.69    0.77 
  -3  -2   4   29.18    0.84 
   3  -2  -4   29.01    0.90 
  -3  -2   4   29.15    0.77 
  -3   2   4   26.59    0.86 
   3   2  -4   28.21    0.76 
  -3   2   4   29.95    0.79 
   3   2  -4   28.43    0.81 
   3   2  -4   29.97    0.76 
   3   2  -4   29.88    0.72 
  -2  -2   4   26.64    0.59 
   2  -2  -4   26.35    0.80 
  -2  -2   4   26.29    0.65 
  -2  -2   4   25.78    0.75 
   2  -2  -4   26.97    0.69 
  -2  -2   4   24.99    0.70 
   2   2  -4   26.05    0.64 
   2   2  -4   26.58    0.68 
   2   2  -4   26.82    0.74 
  -2   2   4   27.88    0.78 
   2   2  -4   25.83    0.70 
  -2   2   4   26.05    0.70 
   1  -2  -4    2.06    0.12 
  -1  -2   4    1.84    0.14 
  -1  -2   4    1.89    0.12 
   1  -2  -4    2.13    0.18 
  -1  -2   4    2.07    0.17 
  -1  -2   4    1.93    0.09 
   1   2  -4    1.90    0.16 
   1   2  -4    1.95    0.09 
  -1   2   4    1.98    0.13 
  -1   2   4    2.27    0.17 
   1   2  -4    2.09    0.13 
   1   2  -4    2.07    0.15 
   0  -2   4  156.18    3.58 
   0  -2  -4  167.47    3.69 
   0  -2  -4  156.70    3.62 
   0  -2  -4  159.62    3.60 
   0  -2   4  158.51    3.69 
   0  -2   4  158.25    3.68 
   0  -2   4  165.79    3.62 
   0   2   4  165.61    3.69 
   0   2  -4  156.48    3.62 
   0   2   4  160.71    3.62 
   0   2  -4  156.33    3.67 
   0   2  -4  160.78    3.68 
   1  -2   4   21.65    0.61 
  -1  -2  -4   21.57    0.54 
   1  -2   4   23.48    0.62 
  -1  -2  -4   22.17    0.52 
   1  -2   4   21.91    0.55 
  -1  -2  -4   22.01    0.59 
  -1  -2  -4   22.21    0.55 
  -1   2  -4   21.68    0.61 
   1   2   4   22.00    0.54 
  -1   2  -4   22.30    0.61 
  -1   2  -4   21.87    0.55 
   1   2   4   22.47    0.52 
   1   2   4   21.67    0.59 
   2  -2   4    0.64    0.09 
  -2  -2  -4    0.62    0.08 
   2  -2   4    0.66    0.07 
  -2  -2  -4    0.48    0.07 
   2  -2   4    0.61    0.10 
   2  -2   4    0.55    0.10 
  -2  -2  -4    0.55    0.06 
   2   2   4    0.60    0.06 
  -2   2  -4    0.61    0.06 
  -2   2  -4    0.65    0.09 
  -2   2  -4    0.57    0.10 
  -2   2  -4    0.60    0.09 
   2   2   4    0.67    0.07 
   3  -2   4   15.19    0.47 
   3  -2   4   14.70    0.39 
   3  -2   4   15.17    0.46 
  -3  -2  -4   14.58    0.42 
  -3  -2  -4   14.66    0.40 
  -3  -2  -4   14.28    0.42 
   3  -2   4   15.09    0.43 
  -3  -2  -4   15.11    0.37 
  -3  -2  -4   14.60    0.45 
   3   2   4   14.20    0.43 
   3   2   4   14.46    0.41 
   3   2   4   15.19    0.40 
   3   2   4   14.85    0.37 
  -3   2  -4   14.47    0.44 
  -3   2  -4   14.95    0.45 
  -3   2  -4   14.17    0.45 
   4  -2   4    4.77    0.28 
   4  -2   4    4.72    0.25 
  -4  -2  -4    4.89    0.23 
  -4  -2  -4    4.77    0.19 
  -4  -2  -4    5.10    0.26 
  -4   2  -4    4.56    0.25 
  -4   2  -4    4.81    0.23 
   4   2   4    4.80    0.28 
   4   2   4    5.01    0.16 
  -4   2  -4    4.53    0.26 
   4   2   4    4.81    0.18 
   4   2   4    4.72    0.24 
  -5  -2  -4    0.11    0.13 
   5  -2   4    0.15    0.11 
  -5  -2  -4    0.13    0.11 
   5  -2   4    0.09    0.08 
  -5   2  -4    0.07    0.13 
   5   2   4    0.09    0.07 
  -5   2  -4   -0.05    0.13 
   5   2   4    0.13    0.06 
  -5   2  -4    0.02    0.08 
   5   2   4    0.06    0.14 
  -6  -2  -4    0.92    0.18 
   6  -2   4    0.70    0.26 
  -6  -2  -4    1.34    0.21 
   6  -2   4    0.87    0.14 
   6  -2   4    0.99    0.16 
   6  -2   4    1.04    0.13 
  -6   2  -4    1.01    0.21 
   6   2   4    0.96    0.09 
   6   2   4    1.12    0.09 
  -6   2  -4    1.19    0.19 
  -6   2  -4    0.97    0.14 
   6   2   4    1.00    0.18 
   6   2   4    1.05    0.22 
   7  -2   4    4.36    0.25 
   7  -2   4    4.17    0.27 
  -7  -2  -4    4.22    0.40 
   7  -2   4    3.91    0.38 
  -7   2  -4    3.18    0.39 
   7   2   4    3.96    0.34 
   7   2   4    3.61    0.34 
  -7   2  -4    3.74    0.31 
   8  -2   4    0.24    0.43 
  -8  -2  -4    0.42    0.29 
   8  -2   4   -0.03    0.15 
   8  -2   4   -0.11    0.13 
   8   2   4   -0.03    0.36 
  -8   2  -4    0.06    0.27 
   8   2   4    0.00    0.20 
   8   2   4    0.08    0.19 
   9  -2   4   -0.04    0.59 
  -9  -2  -4    0.23    0.33 
  -9   2  -4   -0.03    0.29 
   9   2   4    0.11    0.54 
  -9  -3   4   -0.21    0.73 
   9  -3  -4    0.22    0.44 
  -9  -3   4    0.25    0.29 
   9  -3  -4    0.03    0.53 
   9  -3  -4    0.85    0.33 
  -9  -3   4    2.61    0.64 
  -9   3   4    0.16    0.32 
  -9   3   4   -0.19    0.63 
   9   3  -4    0.06    0.33 
   9   3  -4    0.30    0.35 
   9   3  -4    0.16    0.50 
  -9   3   4    0.07    0.57 
   8  -3  -4    5.53    0.45 
  -8  -3   4    4.72    0.58 
   8  -3  -4    4.67    0.50 
   8  -3  -4    5.61    0.60 
  -8   3   4    4.76    0.46 
   8   3  -4    5.25    0.47 
   8   3  -4    6.20    0.51 
  -8   3   4    5.09    0.58 
   8   3  -4    5.57    0.51 
   7  -3  -4    0.24    0.29 
  -7  -3   4    0.34    0.30 
   7  -3  -4   -0.03    0.17 
   7  -3  -4   -0.16    0.26 
  -7  -3   4   -0.02    0.16 
   7   3  -4    0.04    0.21 
   7   3  -4    0.09    0.26 
   7   3  -4   -0.11    0.11 
   7   3  -4   -0.03    0.19 
  -7   3   4   -0.18    0.16 
  -7   3   4    0.25    0.30 
   6  -3  -4    2.93    0.28 
   6  -3  -4    2.95    0.30 
  -6  -3   4    3.17    0.27 
  -6  -3   4    4.66    0.48 
   6  -3  -4    2.65    0.44 
  -6  -3   4    3.09    0.31 
  -6   3   4    3.22    0.35 
   6   3  -4    2.34    0.33 
   6   3  -4    3.21    0.26 
  -6   3   4    2.82    0.44 
  -6   3   4    3.05    0.29 
   6   3  -4    3.02    0.31 
   6   3  -4    2.99    0.29 
  -5  -3   4    2.95    0.31 
  -5  -3   4    3.27    0.22 
   5  -3  -4    2.86    0.25 
  -5  -3   4    2.50    0.22 
  -5  -3   4    3.40    0.27 
   5   3  -4    2.92    0.26 
   5   3  -4    2.80    0.25 
  -5   3   4    3.12    0.33 
  -5   3   4    3.21    0.29 
   5   3  -4    3.06    0.29 
  -5   3   4    2.89    0.24 
   5   3  -4    3.14    0.27 
  -4  -3   4   92.70    2.30 
  -4  -3   4   92.35    2.07 
  -4  -3   4   90.74    2.15 
   4  -3  -4   91.96    2.39 
   4  -3  -4   92.65    2.19 
  -4  -3   4   90.95    2.18 
  -4   3   4   91.63    2.33 
   4   3  -4   87.98    2.17 
   4   3  -4   92.10    2.25 
  -4   3   4   92.62    2.23 
   4   3  -4   91.54    2.20 
   4   3  -4   92.05    2.14 
  -4   3   4   89.83    2.12 
  -3  -3   4   30.49    0.69 
   3  -3  -4   29.78    0.80 
   3  -3  -4   29.81    0.96 
  -3  -3   4   29.70    0.79 
  -3  -3   4   29.45    0.89 
  -3  -3   4   30.12    0.76 
  -3   3   4   30.15    0.82 
   3   3  -4   29.94    0.75 
   3   3  -4   28.78    0.82 
  -3   3   4   29.82    0.91 
   3   3  -4   29.98    0.79 
   3   3  -4   28.36    0.85 
   2  -3  -4    6.88    0.38 
  -2  -3   4    7.52    0.36 
  -2  -3   4    6.75    0.30 
   2  -3  -4    7.55    0.27 
  -2  -3   4    7.28    0.24 
  -2  -3   4    7.08    0.27 
   2   3  -4    7.24    0.31 
  -2   3   4    7.22    0.29 
   2   3  -4    7.24    0.23 
   2   3  -4    7.37    0.34 
   2   3  -4    7.56    0.27 
  -2   3   4    7.56    0.36 
   1  -3  -4   15.36    0.52 
  -1  -3   4   15.10    0.52 
  -1  -3   4   15.18    0.44 
   1  -3  -4   15.61    0.44 
  -1  -3   4   15.54    0.40 
  -1  -3   4   15.53    0.50 
   1   3  -4   15.51    0.49 
  -1   3   4   14.96    0.45 
   1   3  -4   15.83    0.40 
  -1   3   4   15.97    0.54 
   1   3  -4   15.66    0.52 
   1   3  -4   15.59    0.44 
   0  -3   4   40.17    1.08 
   0  -3  -4   41.22    0.93 
   0  -3   4   39.93    1.06 
   0  -3  -4   42.61    1.08 
   0  -3  -4   39.32    0.98 
   0  -3   4   40.12    0.95 
   0  -3   4   41.47    0.99 
   0   3  -4   41.43    1.06 
   0   3  -4   39.85    0.99 
   0   3   4   38.85    1.07 
   0   3   4   42.05    0.99 
   0   3  -4   41.13    1.08 
  -1  -3  -4    4.23    0.14 
   1  -3   4    4.54    0.26 
  -1  -3  -4    4.24    0.16 
   1  -3   4    4.20    0.17 
   1  -3   4    4.45    0.23 
  -1  -3  -4    4.01    0.23 
   1   3   4    4.33    0.14 
  -1   3  -4    4.32    0.23 
  -1   3  -4    4.36    0.18 
   1   3   4    4.45    0.17 
   1   3   4    4.22    0.23 
  -1   3  -4    4.25    0.25 
  -2  -3  -4   37.85    0.90 
  -2  -3  -4   36.55    0.92 
   2  -3   4   38.62    1.01 
  -2  -3  -4   38.44    0.99 
   2  -3   4   38.31    0.93 
   2  -3   4   38.32    1.02 
  -2  -3  -4   37.48    0.91 
  -2   3  -4   38.43    1.00 
   2   3   4   37.79    0.99 
  -2   3  -4   37.19    1.01 
   2   3   4   38.45    0.89 
   2   3   4   37.73    0.91 
  -2   3  -4   38.19    0.93 
  -3  -3  -4    0.60    0.07 
   3  -3   4    0.69    0.13 
   3  -3   4    0.66    0.12 
   3  -3   4    0.39    0.07 
  -3  -3  -4    0.37    0.09 
  -3  -3  -4    0.52    0.10 
   3  -3   4    0.63    0.14 
   3   3   4    0.50    0.11 
  -3   3  -4    0.59    0.12 
  -3   3  -4    0.61    0.12 
  -3   3  -4    0.54    0.09 
  -3   3  -4    0.59    0.13 
   3   3   4    0.49    0.09 
   3   3   4    0.57    0.07 
  -4  -3  -4    5.41    0.19 
  -4  -3  -4    5.35    0.26 
   4  -3   4    5.16    0.21 
   4  -3   4    4.96    0.29 
   4  -3   4    4.96    0.30 
  -4  -3  -4    5.25    0.27 
  -4  -3  -4    4.46    0.24 
   4   3   4    5.20    0.19 
  -4   3  -4    5.11    0.27 
  -4   3  -4    5.45    0.27 
   4   3   4    5.63    0.24 
   4   3   4    5.09    0.25 
  -4   3  -4    5.31    0.24 
  -4   3  -4    4.51    0.31 
   5  -3   4    6.42    0.40 
   5  -3   4    6.56    0.26 
  -5  -3  -4    6.52    0.24 
  -5  -3  -4    6.14    0.31 
  -5  -3  -4    6.24    0.29 
   5  -3   4    6.37    0.32 
   5   3   4    6.53    0.27 
  -5   3  -4    6.31    0.29 
  -5   3  -4    5.52    0.32 
  -5   3  -4    5.91    0.38 
   5   3   4    6.22    0.23 
   5   3   4    6.49    0.32 
   6  -3   4    0.10    0.17 
  -6  -3  -4    0.35    0.17 
  -6  -3  -4    0.14    0.12 
  -6  -3  -4    0.17    0.11 
   6  -3   4    0.21    0.14 
  -6  -3  -4    0.41    0.16 
  -6   3  -4    0.07    0.12 
   6   3   4    0.24    0.09 
  -6   3  -4    0.14    0.19 
  -6   3  -4    0.46    0.19 
   6   3   4    0.30    0.21 
   6   3   4    0.11    0.11 
   7  -3   4   -0.24    0.18 
   7  -3   4    0.09    0.14 
  -7  -3  -4   -0.21    0.19 
   7  -3   4    0.03    0.34 
   7   3   4    0.05    0.27 
  -7   3  -4   -0.17    0.22 
   7   3   4    0.02    0.09 
  -7   3  -4   -0.01    0.17 
   7   3   4    0.02    0.22 
   7   3   4   -0.13    0.10 
   8  -3   4    0.18    0.19 
   8  -3   4    0.19    0.36 
   8  -3   4    0.60    0.44 
  -8   3  -4    0.17    0.24 
   8   3   4   -0.32    0.23 
   8   3   4   -0.23    0.39 
  -8   3  -4    0.14    0.27 
   8   3   4    0.23    0.27 
  -8   3  -4   -0.01    0.20 
   9  -4  -4    0.09    0.55 
   9  -4  -4    0.52    0.49 
  -9  -4   4   -0.40    0.67 
   9  -4  -4    0.24    0.37 
   9   4  -4    0.09    0.39 
  -9   4   4   -0.32    0.30 
  -9   4   4    1.34    0.71 
   9   4  -4    0.21    0.54 
  -8  -4   4    0.27    0.46 
  -8  -4   4   -0.27    0.46 
   8  -4  -4    0.72    0.43 
   8  -4  -4   -0.07    0.25 
   8  -4  -4    0.00    0.39 
   8   4  -4    0.15    0.17 
  -8   4   4    0.16    0.26 
   8   4  -4   -0.27    0.35 
  -8   4   4    0.13    0.49 
   8   4  -4    0.16    0.30 
   8   4  -4    0.09    0.29 
  -8   4   4    0.19    0.44 
   7  -4  -4    0.31    0.31 
   7  -4  -4    0.33    0.32 
  -7  -4   4   -0.06    0.35 
  -7  -4   4    0.01    0.31 
   7  -4  -4    0.30    0.20 
  -7   4   4    0.24    0.32 
  -7   4   4    0.11    0.19 
   7   4  -4   -0.04    0.27 
  -7   4   4    0.14    0.35 
   7   4  -4    0.40    0.18 
   7   4  -4    0.16    0.24 
   7   4  -4    0.17    0.21 
  -6  -4   4    0.19    0.19 
  -6  -4   4    0.28    0.30 
  -6  -4   4   -0.14    0.24 
   6  -4  -4   -0.05    0.14 
   6   4  -4    0.00    0.17 
  -6   4   4    0.01    0.15 
   6   4  -4   -0.01    0.19 
  -6   4   4    0.46    0.29 
   6   4  -4   -0.22    0.20 
   6   4  -4    0.01    0.16 
  -6   4   4   -0.01    0.22 
  -5  -4   4    0.42    0.24 
   5  -4  -4    0.68    0.26 
  -5  -4   4    0.43    0.09 
   5  -4  -4    0.43    0.14 
  -5  -4   4    0.43    0.14 
  -5  -4   4    0.64    0.18 
  -5   4   4    0.60    0.11 
   5   4  -4    0.33    0.17 
  -5   4   4    0.53    0.23 
   5   4  -4    0.48    0.15 
   5   4  -4    0.50    0.15 
   5   4  -4    0.43    0.15 
  -5   4   4    0.27    0.20 
  -4  -4   4   17.01    0.44 
   4  -4  -4   17.11    0.75 
  -4  -4   4   17.01    0.68 
  -4  -4   4   17.04    0.54 
  -4  -4   4   17.24    0.53 
   4  -4  -4   17.27    0.55 
  -4   4   4   16.48    0.69 
  -4   4   4   16.83    0.52 
   4   4  -4   16.88    0.62 
   4   4  -4   16.91    0.54 
   4   4  -4   18.01    0.60 
   4   4  -4   17.59    0.51 
  -4   4   4   17.51    0.60 
  -3  -4   4   38.73    1.03 
   3  -4  -4   40.40    1.03 
   3  -4  -4   39.63    1.21 
  -3  -4   4   40.66    0.92 
  -3  -4   4   39.53    0.98 
  -3  -4   4   37.63    1.14 
  -3   4   4   41.53    1.06 
  -3   4   4   38.63    1.17 
   3   4  -4   37.82    0.96 
   3   4  -4   38.34    1.01 
   3   4  -4   40.38    1.12 
   3   4  -4   38.82    1.08 
   2  -4  -4  174.26    3.91 
   2  -4  -4  169.76    4.04 
  -2  -4   4  168.89    3.98 
  -2  -4   4  167.80    3.84 
  -2  -4   4  170.45    3.90 
  -2  -4   4  164.38    4.02 
   2   4  -4  173.04    3.84 
  -2   4   4  173.07    3.92 
  -2   4   4  171.30    4.05 
   2   4  -4  166.45    4.01 
   2   4  -4  173.65    3.98 
   2   4  -4  164.57    3.89 
  -1  -4   4   46.63    1.16 
  -1  -4   4   47.84    1.24 
  -1  -4   4   48.22    1.29 
   1  -4  -4   45.54    1.27 
   1  -4  -4   46.54    1.15 
  -1  -4   4   47.78    1.10 
  -1   4   4   45.16    1.28 
  -1   4   4   45.96    1.16 
   1   4  -4   46.23    1.09 
   1   4  -4   48.38    1.27 
   1   4  -4   46.06    1.15 
   1   4  -4   45.58    1.22 
   0  -4  -4   18.71    0.63 
   0  -4   4   18.54    0.64 
   0  -4   4   18.87    0.53 
   0  -4  -4   18.90    0.46 
   0  -4  -4   18.50    0.52 
   0  -4   4   19.42    0.48 
   0  -4   4   18.63    0.60 
   0   4  -4   19.10    0.63 
   0   4   4   19.14    0.53 
   0   4   4   19.20    0.64 
   0   4  -4   18.48    0.53 
   0   4  -4   18.79    0.60 
  -1  -4  -4    6.87    0.33 
  -1  -4  -4    6.29    0.23 
   1  -4   4    6.05    0.34 
   1  -4   4    6.28    0.31 
  -1  -4  -4    6.35    0.20 
   1  -4   4    6.13    0.24 
   1   4   4    6.39    0.24 
   1   4   4    6.23    0.19 
   1   4   4    6.09    0.33 
  -1   4  -4    6.23    0.31 
  -1   4  -4    5.82    0.33 
  -1   4  -4    6.14    0.25 
   2  -4   4    0.06    0.07 
   2  -4   4   -0.02    0.11 
  -2  -4  -4    0.01    0.12 
  -2  -4  -4    0.04    0.06 
  -2  -4  -4    0.01    0.07 
   2  -4   4    0.04    0.10 
  -2  -4  -4    0.03    0.07 
  -2   4  -4    0.06    0.07 
   2   4   4   -0.08    0.10 
  -2   4  -4    0.06    0.09 
  -2   4  -4   -0.05    0.12 
   2   4   4   -0.01    0.06 
   2   4   4   -0.01    0.06 
   3  -4   4   48.02    1.20 
   3  -4   4   49.15    1.29 
  -3  -4  -4   49.02    1.28 
  -3  -4  -4   49.59    1.19 
   3  -4   4   49.71    1.34 
  -3  -4  -4   50.33    1.18 
  -3  -4  -4   48.72    1.20 
   3   4   4   50.11    1.17 
  -3   4  -4   47.95    1.33 
   3   4   4   47.98    1.27 
  -3   4  -4   49.97    1.28 
   3   4   4   50.05    1.18 
  -3   4  -4   48.27    1.21 
  -4  -4  -4    0.04    0.14 
   4  -4   4   -0.02    0.08 
  -4  -4  -4    0.08    0.13 
   4  -4   4    0.06    0.14 
  -4  -4  -4    0.13    0.08 
   4  -4   4    0.07    0.13 
   4   4   4    0.12    0.11 
   4   4   4    0.12    0.08 
  -4   4  -4    0.12    0.11 
  -4   4  -4    0.15    0.14 
  -4   4  -4    0.04    0.17 
   4   4   4    0.17    0.13 
  -4   4  -4    0.20    0.12 
   5  -4   4    1.44    0.24 
  -5  -4  -4    1.20    0.18 
   5  -4   4    0.93    0.19 
   5  -4   4    0.86    0.13 
  -5  -4  -4    1.12    0.20 
  -5  -4  -4    1.31    0.20 
  -5  -4  -4    1.26    0.12 
  -5   4  -4    1.03    0.17 
   5   4   4    1.11    0.18 
  -5   4  -4    1.17    0.24 
  -5   4  -4    1.09    0.16 
  -5   4  -4    0.78    0.17 
   5   4   4    1.22    0.13 
   6  -4   4    2.33    0.23 
   6  -4   4    2.81    0.35 
  -6  -4  -4    2.86    0.23 
  -6  -4  -4    2.46    0.23 
   6   4   4    2.62    0.22 
   6   4   4    2.65    0.21 
   6   4   4    2.13    0.25 
  -6   4  -4    2.45    0.27 
  -6   4  -4    2.19    0.32 
  -7  -4  -4    1.35    0.24 
   7  -4   4    1.45    0.29 
   7  -4   4    1.40    0.18 
   7   4   4    1.60    0.15 
   7   4   4    1.38    0.17 
  -7   4  -4    1.03    0.30 
   7   4   4    1.58    0.33 
  -7   4  -4    1.42    0.32 
   8  -4   4    0.94    0.51 
   8  -4   4    0.96    0.30 
   8  -4   4    0.94    0.24 
   8   4   4    0.81    0.41 
  -8   4  -4    0.89    0.32 
   8   4   4    1.04    0.33 
   8   4   4    0.99    0.35 
  -8  -5   4   -0.10    0.51 
   8  -5  -4    0.02    0.45 
  -8  -5   4    0.26    0.39 
   8  -5  -4   -0.19    0.44 
   8  -5  -4    0.16    0.29 
  -8   5   4    0.29    0.55 
   8   5  -4    0.24    0.40 
  -8   5   4    0.20    0.30 
   8   5  -4    0.60    0.26 
   8   5  -4    0.05    0.32 
  -8   5   4    0.10    0.49 
   8   5  -4   -0.78    0.32 
  -7  -5   4   -0.58    0.38 
   7  -5  -4   -0.08    0.36 
  -7  -5   4   -0.13    0.27 
   7  -5  -4    0.13    0.22 
  -7  -5   4    0.28    0.34 
  -7   5   4   -0.27    0.33 
   7   5  -4   -0.04    0.24 
  -7   5   4    0.57    0.42 
   7   5  -4    0.14    0.25 
   7   5  -4    0.31    0.28 
   7   5  -4   -0.29    0.25 
  -6  -5   4    1.59    0.35 
  -6  -5   4    2.24    0.16 
   6  -5  -4    2.08    0.44 
  -6  -5   4    2.11    0.39 
   6  -5  -4    2.26    0.27 
  -6   5   4    1.94    0.31 
   6   5  -4    2.18    0.32 
   6   5  -4    2.09    0.26 
   6   5  -4    1.84    0.25 
  -6   5   4    1.55    0.23 
   6   5  -4    2.35    0.28 
  -5  -5   4    0.41    0.23 
  -5  -5   4    0.61    0.16 
   5  -5  -4    0.57    0.15 
  -5  -5   4    0.59    0.10 
   5  -5  -4    0.38    0.28 
  -5  -5   4    0.77    0.30 
   5   5  -4    0.54    0.22 
   5   5  -4    0.67    0.20 
   5   5  -4    0.51    0.18 
  -5   5   4    0.63    0.14 
   5   5  -4    0.38    0.17 
  -5   5   4    0.47    0.22 
  -4  -5   4   -0.21    0.22 
   4  -5  -4    0.14    0.12 
  -4  -5   4    0.13    0.08 
  -4  -5   4    0.24    0.13 
   4  -5  -4    0.14    0.22 
  -4  -5   4    0.15    0.14 
  -4   5   4    0.20    0.12 
   4   5  -4    0.02    0.12 
   4   5  -4    0.23    0.17 
  -4   5   4   -0.03    0.16 
   4   5  -4    0.21    0.14 
   4   5  -4   -0.11    0.17 
  -4   5   4   -0.19    0.21 
   3  -5  -4    0.71    0.13 
  -3  -5   4    0.36    0.21 
   3  -5  -4    0.99    0.24 
  -3  -5   4    0.60    0.13 
  -3  -5   4    0.48    0.12 
   3   5  -4    0.63    0.13 
  -3   5   4    0.59    0.16 
   3   5  -4    0.73    0.19 
  -3   5   4    0.57    0.20 
   3   5  -4    0.54    0.17 
   3   5  -4    0.60    0.11 
  -2  -5   4    6.16    0.28 
  -2  -5   4    6.33    0.25 
   2  -5  -4    5.63    0.38 
   2  -5  -4    6.05    0.28 
  -2  -5   4    6.33    0.42 
  -2   5   4    6.91    0.42 
   2   5  -4    5.60    0.38 
  -2   5   4    6.25    0.31 
   2   5  -4    6.36    0.24 
   2   5  -4    6.35    0.29 
   2   5  -4    6.46    0.36 
  -1  -5   4    7.85    0.26 
  -1  -5   4    8.39    0.45 
   1  -5  -4    7.48    0.42 
  -1  -5   4    8.50    0.40 
  -1  -5   4    8.24    0.31 
   1  -5  -4    8.07    0.31 
  -1   5   4    7.65    0.32 
   1   5  -4    7.73    0.32 
   1   5  -4    8.32    0.26 
  -1   5   4    8.59    0.45 
   1   5  -4    8.16    0.39 
   1   5  -4    8.62    0.43 
   0  -5   4   50.26    1.26 
   0  -5  -4   50.34    1.18 
   0  -5  -4   49.47    1.25 
   0  -5   4   50.65    1.42 
   0  -5   4   51.74    1.37 
   0  -5   4   52.63    1.20 
   0  -5  -4   48.62    1.39 
   0   5  -4   50.69    1.26 
   0   5   4   50.15    1.26 
   0   5   4   51.77    1.41 
   0   5  -4   53.22    1.41 
   0   5  -4   50.33    1.36 
  -1  -5  -4    0.06    0.07 
   1  -5   4   -0.05    0.13 
  -1  -5  -4    0.07    0.14 
   1  -5   4   -0.16    0.10 
  -1  -5  -4   -0.02    0.07 
   1  -5   4    0.01    0.08 
   1   5   4    0.08    0.06 
  -1   5  -4    0.38    0.12 
   1   5   4    0.20    0.14 
  -1   5  -4    0.01    0.09 
   1   5   4    0.08    0.09 
  -1   5  -4   -0.05    0.14 
  -2  -5  -4    0.79    0.18 
  -2  -5  -4    1.09    0.12 
   2  -5   4    1.03    0.18 
   2  -5   4    0.95    0.13 
  -2  -5  -4    0.83    0.11 
   2  -5   4    0.84    0.19 
   2   5   4    0.90    0.12 
  -2   5  -4    0.87    0.13 
  -2   5  -4    1.13    0.19 
   2   5   4    0.94    0.18 
  -2   5  -4    0.87    0.20 
   2   5   4    0.87    0.09 
   3  -5   4    2.99    0.28 
   3  -5   4    3.40    0.33 
  -3  -5  -4    3.13    0.19 
   3  -5   4    3.13    0.21 
  -3  -5  -4    3.57    0.31 
  -3  -5  -4    3.36    0.22 
  -3  -5  -4    3.01    0.20 
   3   5   4    3.50    0.20 
  -3   5  -4    3.31    0.33 
  -3   5  -4    3.31    0.24 
   3   5   4    3.25    0.19 
  -3   5  -4    3.43    0.28 
   3   5   4    3.43    0.30 
  -4  -5  -4    8.14    0.36 
  -4  -5  -4    8.00    0.31 
  -4  -5  -4    7.77    0.34 
   4  -5   4    8.14    0.41 
  -4  -5  -4    7.95    0.43 
   4  -5   4    8.37    0.33 
   4  -5   4    7.63    0.47 
   4   5   4    7.35    0.41 
  -4   5  -4    7.61    0.36 
  -4   5  -4    7.90    0.36 
  -4   5  -4    7.76    0.40 
   4   5   4    8.34    0.32 
   4   5   4    8.16    0.32 
  -4   5  -4    7.37    0.49 
  -5  -5  -4    0.67    0.21 
  -5  -5  -4    0.03    0.19 
  -5  -5  -4    0.61    0.13 
   5  -5   4    0.39    0.17 
  -5  -5  -4    0.63    0.18 
   5  -5   4    0.74    0.15 
   5  -5   4    1.07    0.26 
   5   5   4    0.65    0.18 
  -5   5  -4    0.76    0.20 
   5   5   4    0.76    0.14 
  -5   5  -4    0.66    0.17 
  -5   5  -4    0.40    0.24 
   5   5   4    0.51    0.17 
  -5   5  -4    0.68    0.18 
  -6  -5  -4    0.95    0.20 
  -6  -5  -4    1.15    0.16 
   6  -5   4    0.82    0.42 
  -6  -5  -4    0.16    0.21 
   6  -5   4    0.94    0.17 
  -6  -5  -4    1.10    0.29 
  -6   5  -4    0.60    0.20 
   6   5   4    1.21    0.17 
   6   5   4    1.02    0.23 
  -6   5  -4    0.68    0.32 
  -7  -5  -4    1.28    0.26 
  -7  -5  -4    1.15    0.26 
   7  -5   4    1.05    0.37 
   7  -5   4    1.03    0.20 
   7   5   4    1.29    0.18 
  -7   5  -4    1.10    0.30 
   7   5   4    1.75    0.24 
   7   5   4    1.25    0.31 
   8  -5   4    1.39    0.39 
   8  -5   4    1.18    0.25 
   8  -5   4    0.77    0.59 
  -8  -5  -4    0.89    0.30 
   8   5   4    1.13    0.43 
  -8   5  -4    1.14    0.43 
  -8   5  -4   -0.10    0.45 
  -8   5  -4    0.87    0.36 
   8   5   4    1.20    0.39 
   8   5   4    1.14    0.43 
   8   5   4    1.48    0.21 
   8  -6  -4    2.43    0.59 
  -8  -6   4    2.94    0.61 
  -8  -6   4    0.37    0.59 
   8  -6  -4    2.50    0.40 
   8  -6  -4    1.02    0.54 
  -8  -6   4    1.51    0.46 
   8   6  -4    1.38    0.42 
  -8   6   4    1.64    0.37 
  -8   6   4    1.69    0.68 
   8   6  -4    2.28    0.40 
   8   6  -4    3.15    0.42 
   8   6  -4    1.92    0.48 
  -8   6   4   -0.15    0.52 
  -7  -6   4    0.46    0.47 
   7  -6  -4   -1.09    0.47 
  -7  -6   4    0.41    0.29 
   7  -6  -4   -0.02    0.25 
  -7  -6   4   -0.53    0.35 
  -7   6   4    0.09    0.38 
  -7   6   4    0.31    0.27 
   7   6  -4    0.20    0.33 
  -7   6   4   -0.32    0.48 
   7   6  -4    0.30    0.31 
   7   6  -4    0.25    0.27 
   7   6  -4    0.06    0.31 
  -6  -6   4    0.09    0.36 
   6  -6  -4   -0.05    0.19 
  -6  -6   4    0.10    0.12 
  -6  -6   4    0.57    0.27 
   6  -6  -4   -0.22    0.38 
  -6  -6   4   -0.05    0.22 
  -6   6   4    0.17    0.16 
  -6   6   4   -0.10    0.30 
  -6   6   4   -0.14    0.37 
   6   6  -4    0.05    0.21 
   6   6  -4   -0.18    0.27 
   6   6  -4   -0.02    0.22 
   6   6  -4    0.26    0.25 
  -5  -6   4    2.25    0.27 
  -5  -6   4    2.64    0.39 
   5  -6  -4    2.38    0.26 
   5  -6  -4    2.47    0.45 
  -5  -6   4    2.25    0.25 
  -5  -6   4    2.37    0.20 
  -5   6   4    2.13    0.31 
   5   6  -4    2.22    0.23 
   5   6  -4    2.70    0.34 
  -5   6   4    3.03    0.64 
   5   6  -4    2.75    0.33 
  -5   6   4    3.06    0.31 
   4  -6  -4   -0.17    0.13 
   4  -6  -4    0.15    0.28 
  -4  -6   4    0.08    0.13 
  -4  -6   4   -0.01    0.15 
  -4  -6   4    0.07    0.09 
  -4  -6   4    0.09    0.24 
   4   6  -4   -0.06    0.13 
   4   6  -4    0.17    0.22 
   4   6  -4   -0.07    0.14 
  -4   6   4    0.04    0.15 
  -4   6   4   -0.07    0.18 
   4   6  -4    0.09    0.20 
  -4   6   4    0.12    0.24 
   3  -6  -4    0.84    0.24 
  -3  -6   4    1.13    0.16 
  -3  -6   4    1.17    0.16 
  -3  -6   4    1.35    0.29 
   3  -6  -4    1.02    0.15 
   3   6  -4    0.92    0.17 
   3   6  -4    1.13    0.25 
  -3   6   4    1.34    0.21 
  -3   6   4    1.05    0.19 
   3   6  -4    1.25    0.22 
  -3   6   4    0.92    0.27 
   3   6  -4    1.09    0.14 
   2  -6  -4    0.02    0.10 
   2  -6  -4    0.19    0.19 
  -2  -6   4    0.08    0.10 
  -2  -6   4   -0.10    0.17 
  -2  -6   4    0.04    0.10 
   2   6  -4    0.03    0.11 
  -2   6   4    0.05    0.20 
   2   6  -4    0.02    0.15 
   2   6  -4    0.18    0.09 
  -2   6   4    0.17    0.14 
   2   6  -4    0.03    0.17 
  -1  -6   4   15.18    0.67 
   1  -6  -4   15.65    0.65 
  -1  -6   4   15.57    0.44 
  -1  -6   4   15.62    0.50 
   1  -6  -4   14.99    0.49 
  -1   6   4   15.53    0.51 
   1   6  -4   16.66    0.67 
  -1   6   4   15.20    0.68 
   1   6  -4   14.96    0.43 
   1   6  -4   14.71    0.50 
   1   6  -4   14.46    0.58 
   0  -6  -4   21.43    0.62 
   0  -6   4   21.08    0.80 
   0  -6   4   21.67    0.56 
   0  -6  -4   20.51    0.78 
   0  -6  -4   21.30    0.54 
   0  -6   4   21.02    0.63 
   0  -6   4   22.14    0.75 
   0   6  -4   20.40    0.63 
   0   6  -4   20.83    0.72 
   0   6  -4   21.57    0.79 
   0   6   4   20.97    0.63 
   0   6   4   20.97    0.80 
   1  -6   4    0.40    0.19 
   1  -6   4    0.22    0.08 
  -1  -6  -4    0.67    0.20 
  -1  -6  -4    0.26    0.10 
   1  -6   4    0.26    0.10 
   1  -6   4    0.37    0.16 
  -1  -6  -4    0.29    0.08 
   1   6   4    0.33    0.19 
  -1   6  -4    0.35    0.20 
  -1   6  -4    0.60    0.16 
   1   6   4    0.48    0.12 
  -1   6  -4    0.26    0.12 
  -2  -6  -4    2.41    0.19 
   2  -6   4    2.25    0.20 
   2  -6   4    2.11    0.25 
  -2  -6  -4    2.45    0.19 
   2  -6   4    2.05    0.29 
  -2  -6  -4    1.79    0.25 
  -2   6  -4    2.23    0.30 
  -2   6  -4    1.94    0.24 
  -2   6  -4    2.21    0.23 
   2   6   4    2.56    0.31 
   2   6   4    2.34    0.20 
   2   6   4    2.28    0.16 
  -3  -6  -4    0.42    0.13 
   3  -6   4    0.16    0.12 
   3  -6   4    0.31    0.18 
  -3  -6  -4    0.58    0.20 
   3  -6   4    0.21    0.20 
  -3  -6  -4    0.32    0.12 
  -3  -6  -4    0.21    0.13 
   3   6   4    0.36    0.12 
   3   6   4    0.09    0.20 
  -3   6  -4    0.25    0.18 
  -3   6  -4    0.15    0.14 
  -3   6  -4    0.52    0.17 
   3   6   4    0.34    0.11 
  -4  -6  -4   29.96    0.80 
  -4  -6  -4   29.36    0.80 
  -4  -6  -4   28.86    0.95 
  -4  -6  -4   28.47    0.79 
   4  -6   4   28.38    0.93 
   4  -6   4   27.60    0.81 
   4  -6   4   28.02    0.99 
  -4   6  -4   29.85    0.90 
  -4   6  -4   29.23    0.85 
   4   6   4   28.04    0.76 
   4   6   4   27.84    0.92 
  -4   6  -4   28.18    1.01 
   4   6   4   28.27    0.79 
   5  -6   4   12.85    0.49 
  -5  -6  -4   13.06    0.50 
  -5  -6  -4   13.16    0.47 
   5   6   4   12.97    0.47 
  -5   6  -4   12.88    0.74 
   5   6   4   13.45    0.48 
   5   6   4   12.77    0.58 
  -5   6  -4   12.88    0.56 
  -5   6  -4   13.54    0.57 
  -5   6  -4   12.66    0.53 
  -6  -6  -4    5.08    0.39 
   6  -6   4    5.15    0.36 
  -6  -6  -4    5.55    0.33 
   6  -6   4    5.45    0.54 
   6   6   4    4.71    0.42 
   6   6   4    5.44    0.44 
  -7  -6  -4    0.04    0.25 
   7  -6   4   -0.24    0.22 
  -7  -6  -4   -0.16    0.22 
   7  -6   4   -0.33    0.44 
  -7  -6  -4   -0.43    0.31 
  -7   6  -4   -0.36    0.31 
   7   6   4    0.13    0.20 
  -7   6  -4   -0.31    0.42 
   7   6   4    0.21    0.41 
  -7   6  -4   -0.04    0.26 
   7   6   4    0.27    0.26 
   7   6   4   -0.15    0.32 
  -8  -6  -4   -0.14    0.45 
  -8  -6  -4    0.02    0.30 
   8  -6   4   -0.30    0.47 
   8   6   4    0.15    0.33 
  -8   6  -4    0.13    0.52 
   8   6   4    0.13    0.51 
  -8   6  -4    0.17    0.31 
   8   6   4   -0.15    0.45 
   8   6   4   -0.09    0.24 
  -8  -7   4   -0.40    0.47 
  -8  -7   4    0.76    0.75 
   8  -7  -4   -0.41    0.64 
   8  -7  -4   -0.53    0.38 
   8   7  -4   -0.17    0.40 
  -8   7   4    0.04    0.34 
  -8   7   4    0.40    0.64 
   8   7  -4    0.04    0.48 
   8   7  -4   -0.82    0.45 
   7  -7  -4    1.41    0.33 
   7  -7  -4    0.88    0.58 
  -7  -7   4    2.08    0.47 
  -7  -7   4    1.47    0.36 
  -7  -7   4    0.02    0.56 
  -7   7   4    0.77    0.57 
   7   7  -4    1.23    0.35 
  -7   7   4    0.67    0.31 
  -7   7   4   -0.41    0.43 
   7   7  -4    1.59    0.38 
   7   7  -4    1.10    0.44 
  -6  -7   4    1.01    0.26 
  -6  -7   4    0.86    0.45 
   6  -7  -4    1.36    0.27 
   6  -7  -4    1.08    0.47 
  -6  -7   4    1.37    0.33 
   6   7  -4    1.43    0.36 
  -6   7   4    0.92    0.37 
   6   7  -4    0.99    0.28 
   6   7  -4    0.77    0.28 
  -6   7   4    1.03    0.50 
   6   7  -4    1.40    0.38 
   5  -7  -4    5.29    0.39 
  -5  -7   4    5.30    0.56 
   5  -7  -4    5.61    0.63 
  -5  -7   4    5.13    0.27 
   5   7  -4    5.87    0.42 
  -5   7   4    5.79    0.44 
  -5   7   4    5.28    0.51 
   5   7  -4    4.63    0.48 
   5   7  -4    6.19    0.55 
   5   7  -4    6.26    0.39 
  -4  -7   4    1.64    0.15 
  -4  -7   4    1.36    0.22 
  -4  -7   4    1.87    0.24 
   4  -7  -4    1.63    0.23 
  -4  -7   4    1.69    0.37 
  -4   7   4    1.77    0.28 
   4   7  -4    1.98    0.25 
  -4   7   4    1.51    0.24 
   4   7  -4    1.25    0.34 
   4   7  -4    1.28    0.35 
   4   7  -4    1.43    0.27 
  -3  -7   4    6.36    0.58 
   3  -7  -4    7.02    0.50 
  -3  -7   4    6.78    0.37 
   3  -7  -4    6.11    0.36 
  -3  -7   4    6.63    0.34 
   3   7  -4    6.39    0.37 
  -3   7   4    6.27    0.43 
  -3   7   4    6.09    0.56 
  -3   7   4    7.26    0.42 
   3   7  -4    6.40    0.46 
   3   7  -4    6.52    0.29 
   3   7  -4    5.94    0.51 
   2  -7  -4    0.16    0.20 
  -2  -7   4    0.22    0.24 
  -2  -7   4    0.21    0.13 
   2  -7  -4    0.04    0.12 
  -2  -7   4    0.10    0.13 
  -2   7   4   -0.40    0.23 
   2   7  -4   -0.01    0.18 
  -2   7   4    0.11    0.15 
   2   7  -4    0.01    0.22 
   2   7  -4    0.08    0.13 
   2   7  -4   -0.01    0.10 
   1  -7  -4    0.86    0.15 
  -1  -7   4    0.68    0.12 
  -1  -7   4    0.66    0.15 
  -1  -7   4    0.62    0.27 
   1  -7  -4    0.47    0.21 
   1  -7  -4    0.63    0.10 
   1   7  -4    0.83    0.17 
   1   7  -4    0.83    0.26 
   1   7  -4    0.61    0.20 
  -1   7   4    0.70    0.17 
  -1   7   4    1.00    0.28 
   0  -7  -4    2.25    0.23 
   0  -7   4    2.15    0.21 
   0  -7  -4    2.63    0.34 
   0  -7  -4    2.19    0.17 
   0  -7   4    2.35    0.19 
   0  -7   4    2.04    0.32 
   0   7  -4    2.18    0.32 
   0   7  -4    2.35    0.23 
   0   7   4    2.29    0.24 
   0   7  -4    2.63    0.31 
   0   7   4    2.22    0.34 
   1  -7   4    5.78    0.32 
  -1  -7  -4    5.95    0.30 
   1  -7   4    5.46    0.47 
  -1  -7  -4    6.01    0.25 
   1  -7   4    5.82    0.24 
  -1  -7  -4    6.20    0.48 
   1   7   4    5.69    0.31 
  -1   7  -4    6.25    0.49 
  -1   7  -4    5.91    0.33 
   1   7   4    6.15    0.49 
  -1   7  -4    6.02    0.41 
  -2  -7  -4   39.28    1.03 
   2  -7   4   37.11    1.04 
   2  -7   4   37.81    1.24 
  -2  -7  -4   38.92    1.23 
  -2  -7  -4   38.32    0.96 
   2   7   4   37.90    1.22 
   2   7   4   38.45    0.94 
  -2   7  -4   37.40    1.24 
   2   7   4   37.40    1.03 
  -2   7  -4   38.64    1.17 
  -2   7  -4   38.60    1.05 
   3  -7   4   73.75    1.81 
  -3  -7  -4   73.68    1.73 
  -3  -7  -4   69.32    1.74 
  -3  -7  -4   74.32    1.78 
  -3  -7  -4   72.24    1.98 
   3  -7   4   70.93    2.02 
   3   7   4   72.51    1.70 
  -3   7  -4   68.27    2.14 
   3   7   4   70.17    1.96 
  -3   7  -4   72.45    1.91 
  -3   7  -4   72.51    1.81 
   3   7   4   71.41    1.78 
  -4  -7  -4    0.73    0.20 
   4  -7   4    1.05    0.19 
   4  -7   4    0.45    0.27 
  -4  -7  -4    0.62    0.18 
  -4  -7  -4    1.03    0.29 
  -4  -7  -4    1.05    0.20 
   4   7   4    0.95    0.18 
   4   7   4    0.64    0.18 
  -4   7  -4    0.60    0.21 
  -4   7  -4    0.95    0.25 
   4   7   4    0.80    0.29 
  -4   7  -4    0.61    0.31 
   5  -7   4    1.12    0.22 
  -5  -7  -4    1.53    0.29 
  -5  -7  -4    1.61    0.23 
  -5  -7  -4    1.71    0.21 
   5  -7   4    1.46    0.34 
  -5   7  -4    1.81    0.27 
   5   7   4    1.12    0.30 
  -5   7  -4    0.89    0.26 
   5   7   4    1.19    0.26 
   5   7   4    1.52    0.22 
  -5   7  -4    1.76    0.29 
  -6  -7  -4    3.35    0.30 
   6  -7   4    2.59    0.29 
  -6  -7  -4    2.61    0.39 
   6  -7   4    2.77    0.55 
   6   7   4    3.08    0.33 
   6   7   4    2.80    0.28 
   6   7   4    2.21    0.34 
  -6   7  -4    2.37    0.50 
  -6   7  -4    2.48    0.35 
  -7  -7  -4    2.52    0.50 
  -7  -7  -4    1.64    0.31 
  -7  -7  -4    2.71    0.31 
   7  -7   4    2.36    0.62 
   7  -7   4    2.12    0.31 
  -7   7  -4    1.47    0.57 
   7   7   4    1.82    0.38 
  -7   7  -4    1.84    0.34 
   7   7   4    2.13    0.29 
   7   7   4    1.64    0.34 
   7   7   4    2.39    0.55 
  -7  -8   4    0.94    0.38 
  -7  -8   4   -0.70    0.65 
   7  -8  -4   -0.13    0.68 
   7  -8  -4   -0.16    0.40 
  -7  -8   4   -0.16    0.52 
   7   8  -4    0.29    0.41 
  -7   8   4    0.14    0.50 
  -7   8   4   -0.09    0.25 
   7   8  -4   -0.10    0.44 
   7   8  -4    0.08    0.36 
  -7   8   4    1.36    0.73 
  -7   8   4    0.04    0.29 
   7   8  -4   -0.22    0.45 
   6  -8  -4   -0.09    0.27 
  -6  -8   4   -0.04    0.18 
  -6  -8   4    0.15    0.36 
  -6  -8   4    0.04    0.28 
   6  -8  -4   -1.16    0.55 
  -6  -8   4    0.17    0.50 
  -6   8   4    0.66    0.53 
  -6   8   4    0.55    0.38 
   6   8  -4   -0.13    0.29 
   6   8  -4    0.17    0.37 
  -6   8   4    0.08    0.28 
   6   8  -4   -0.01    0.30 
   6   8  -4    0.36    0.39 
  -5  -8   4    2.45    0.20 
  -5  -8   4    2.18    0.30 
   5  -8  -4    3.53    0.58 
  -5  -8   4    2.37    0.52 
   5  -8  -4    2.19    0.31 
  -5  -8   4    2.58    0.34 
  -5   8   4    2.94    0.43 
   5   8  -4    2.24    0.29 
   5   8  -4    2.53    0.44 
  -5   8   4    2.78    0.37 
   5   8  -4    2.34    0.27 
   5   8  -4    1.62    0.41 
  -4  -8   4    0.32    0.40 
  -4  -8   4    0.07    0.12 
   4  -8  -4    0.45    0.34 
   4  -8  -4    0.02    0.17 
  -4   8   4    0.21    0.24 
  -4   8   4    0.07    0.25 
   4   8  -4    0.14    0.18 
   4   8  -4    0.18    0.32 
   4   8  -4    0.29    0.20 
   4   8  -4    0.08    0.28 
   3  -8  -4    5.80    0.59 
  -3  -8   4    6.34    0.67 
  -3  -8   4    6.14    0.37 
   3  -8  -4    5.88    0.38 
  -3   8   4    6.10    0.64 
  -3   8   4    5.86    0.48 
  -3   8   4    5.88    0.44 
   3   8  -4    6.17    0.58 
   2  -8  -4   -0.10    0.27 
  -2  -8   4    0.11    0.17 
  -2  -8   4   -0.09    0.27 
   2  -8  -4   -0.16    0.14 
  -2   8   4   -0.18    0.28 
   2   8  -4   -0.18    0.26 
   2   8  -4    0.16    0.13 
  -2   8   4    0.36    0.20 
  -2   8   4    0.39    0.24 
   2   8  -4    0.18    0.17 
   2   8  -4    0.14    0.20 
  -1  -8   4    1.78    0.22 
   1  -8  -4    1.76    0.15 
  -1  -8   4    1.79    0.37 
  -1  -8   4    1.73    0.18 
   1  -8  -4    1.65    0.21 
   1  -8  -4    1.93    0.33 
   1   8  -4    1.88    0.36 
  -1   8   4    1.77    0.24 
  -1   8   4    1.77    0.38 
   1   8  -4    1.50    0.22 
   1   8  -4    1.76    0.30 
   0  -8   4   10.26    0.38 
   0  -8  -4   10.43    0.44 
   0  -8   4   11.49    0.68 
   0  -8  -4   11.00    0.66 
   0  -8   4   10.11    0.45 
   0  -8  -4   10.71    0.36 
   0   8  -4   10.24    0.59 
   0   8  -4    9.57    0.64 
   0   8  -4   10.66    0.48 
   0   8   4   10.86    0.47 
   0   8   4    9.91    0.68 
  -1  -8  -4   27.68    0.74 
   1  -8   4   28.11    1.08 
  -1  -8  -4   28.63    1.07 
  -1  -8  -4   27.05    0.82 
   1  -8   4   28.93    0.85 
   1  -8   4   27.83    0.74 
  -1   8  -4   27.44    0.86 
   1   8   4   29.25    1.09 
  -1   8  -4   27.44    1.06 
   1   8   4   27.96    0.85 
  -1   8  -4   28.47    0.99 
  -2  -8  -4    3.69    0.44 
   2  -8   4    2.05    0.27 
   2  -8   4    2.73    0.29 
   2  -8   4    3.00    0.39 
  -2  -8  -4    2.60    0.21 
  -2  -8  -4    2.67    0.27 
   2   8   4    2.82    0.30 
   2   8   4    2.63    0.21 
  -2   8  -4    3.30    0.39 
   2   8   4    2.69    0.36 
  -2   8  -4    3.12    0.30 
  -3  -8  -4    1.15    0.21 
  -3  -8  -4    1.19    0.33 
   3  -8   4    1.17    0.32 
  -3  -8  -4    1.12    0.20 
   3  -8   4    1.05    0.22 
  -3   8  -4    1.02    0.25 
   3   8   4    0.83    0.33 
  -3   8  -4    0.57    0.35 
   3   8   4    0.87    0.16 
   3   8   4    0.58    0.25 
  -3   8  -4    1.01    0.27 
   4  -8   4    2.24    0.27 
  -4  -8  -4    1.98    0.23 
   4  -8   4    2.79    0.43 
  -4  -8  -4    2.28    0.40 
  -4  -8  -4    2.06    0.26 
  -4   8  -4    2.61    0.35 
   4   8   4    2.26    0.26 
   4   8   4    2.36    0.41 
   4   8   4    2.59    0.24 
  -4   8  -4    1.96    0.45 
  -4   8  -4    2.19    0.30 
   5  -8   4    2.46    0.44 
   5  -8   4    3.99    0.41 
  -5  -8  -4    2.56    0.29 
  -5  -8  -4    3.29    0.30 
   5   8   4    2.87    0.43 
  -5   8  -4    2.91    0.37 
   5   8   4    2.82    0.28 
   5   8   4    2.83    0.30 
  -5   8  -4    2.47    0.52 
  -6  -8  -4    0.34    0.25 
  -6  -8  -4    0.55    0.26 
  -6  -8  -4    0.53    0.39 
  -6  -8  -4    0.18    0.41 
   6  -8   4    0.92    0.30 
   6  -8   4    0.10    0.52 
   6   8   4    0.45    0.30 
  -6   8  -4    0.05    0.35 
   6   8   4    1.18    0.50 
   6   8   4    0.35    0.33 
  -6   8  -4    0.93    0.32 
   6   8   4    0.80    0.27 
  -6   8  -4    0.45    0.51 
  -6   8  -4    0.16    0.30 
   7  -8   4    2.01    0.77 
  -7  -8  -4    0.85    0.34 
   7  -8   4    0.34    0.33 
  -7  -8  -4    0.76    0.32 
  -7  -8  -4    1.02    0.59 
   7   8   4    1.06    0.40 
  -7   8  -4    0.47    0.53 
  -7   8  -4    1.08    0.66 
  -7   8  -4    0.58    0.32 
   7   8   4    0.85    0.61 
   7   8   4    0.44    0.39 
   7   8   4    0.73    0.33 
  -7   8  -4    0.26    0.35 
   7  -9  -4    0.23    0.43 
  -7  -9   4   -0.25    0.78 
   7  -9  -4    0.02    0.81 
  -7  -9   4   -0.08    0.26 
   7   9  -4   -0.16    0.45 
  -7   9   4    0.01    0.29 
   7   9  -4   -0.37    0.57 
  -7   9   4   -0.41    0.60 
   7   9  -4    0.22    0.42 
   7   9  -4   -1.37    0.58 
  -6  -9   4    0.67    0.65 
   6  -9  -4    0.83    0.66 
  -6  -9   4    0.31    0.34 
  -6  -9   4    0.32    0.42 
   6  -9  -4    0.40    0.34 
  -6  -9   4    0.27    0.22 
   6   9  -4    0.89    0.48 
   6   9  -4   -0.70    0.50 
  -6   9   4   -0.31    0.34 
   6   9  -4    0.52    0.35 
  -6   9   4    1.07    0.53 
   6   9  -4    0.82    0.36 
  -6   9   4   -0.38    0.61 
  -5  -9   4   -0.14    0.18 
  -5  -9   4    0.98    0.57 
   5  -9  -4    0.03    0.28 
  -5  -9   4   -0.20    0.29 
  -5  -9   4   -0.08    0.32 
   5  -9  -4   -0.25    0.51 
   5   9  -4    0.21    0.28 
   5   9  -4    0.24    0.26 
   5   9  -4    0.16    0.44 
  -5   9   4    0.36    0.33 
   5   9  -4    0.53    0.42 
  -5   9   4    0.34    0.50 
   4  -9  -4    2.48    0.31 
  -4  -9   4    2.26    0.30 
  -4  -9   4    2.30    0.55 
   4  -9  -4    1.88    0.48 
  -4  -9   4    1.79    0.35 
   4   9  -4    2.45    0.32 
   4   9  -4    2.43    0.48 
  -4   9   4    2.36    0.48 
   4   9  -4    2.80    0.44 
   4   9  -4    2.42    0.24 
  -4   9   4    2.76    0.41 
  -4   9   4    3.17    0.42 
   3  -9  -4    6.28    0.66 
   3  -9  -4    6.00    0.44 
  -3  -9   4    6.61    0.65 
   3   9  -4    6.11    0.35 
  -3   9   4    6.27    0.51 
   3   9  -4    6.77    0.62 
  -3   9   4    5.63    0.61 
   3   9  -4    6.42    0.47 
   3   9  -4    6.26    0.60 
  -2  -9   4   13.35    0.85 
   2  -9  -4   12.39    0.43 
   2  -9  -4   11.84    0.55 
  -2  -9   4   12.67    0.55 
  -2   9   4   11.50    0.71 
  -2   9   4   12.71    0.61 
   2   9  -4   11.43    0.79 
   2   9  -4   11.78    0.65 
   2   9  -4   13.04    0.58 
  -2   9   4   12.65    0.85 
  -1  -9   4    8.19    0.45 
   1  -9  -4    8.48    0.44 
   1  -9  -4    8.32    0.39 
  -1  -9   4    9.28    0.72 
   1  -9  -4    8.14    0.66 
  -1   9   4    8.15    0.49 
   1   9  -4    7.02    0.74 
   1   9  -4    7.90    0.47 
  -1   9   4    8.38    0.59 
  -1   9   4    8.87    0.71 
   0  -9  -4    3.69    0.49 
   0  -9  -4    4.08    0.28 
   0  -9   4    4.45    0.51 
   0  -9  -4    3.44    0.30 
   0  -9   4    3.63    0.34 
   0   9  -4    4.64    0.50 
   0   9  -4    3.49    0.37 
   0   9   4    3.41    0.48 
   0   9  -4    4.30    0.52 
  -1  -9  -4    3.19    0.44 
  -1  -9  -4    3.07    0.24 
   1  -9   4    2.66    0.28 
   1  -9   4    1.98    0.42 
  -1   9  -4    2.68    0.30 
   1   9   4    2.23    0.26 
   1   9   4    2.59    0.43 
  -1   9  -4    3.19    0.40 
  -1   9  -4    2.39    0.41 
   2  -9   4    0.01    0.33 
   2  -9   4    0.69    0.22 
  -2  -9  -4    0.50    0.37 
   2   9   4    0.42    0.20 
  -2   9  -4    0.66    0.25 
  -2   9  -4    0.56    0.28 
   2   9   4    0.58    0.39 
  -3  -9  -4    0.38    0.21 
  -3  -9  -4    0.64    0.37 
  -3  -9  -4    0.21    0.19 
   3  -9   4    0.14    0.34 
   3  -9   4    0.16    0.21 
  -3   9  -4    0.35    0.29 
   3   9   4    0.27    0.22 
  -3   9  -4    0.33    0.26 
   3   9   4    0.29    0.30 
   3   9   4    0.23    0.38 
  -4  -9  -4    0.09    0.21 
  -4  -9  -4    0.28    0.20 
  -4  -9  -4   -0.36    0.37 
   4  -9   4   -0.47    0.31 
   4  -9   4    0.07    0.25 
   4   9   4   -0.39    0.38 
  -4   9  -4   -0.05    0.30 
  -4   9  -4    0.03    0.31 
   4   9   4    0.15    0.23 
  -4   9  -4   -0.87    0.38 
   4   9   4   -0.17    0.20 
   5  -9   4    0.44    0.29 
  -5  -9  -4    0.07    0.24 
  -5  -9  -4    1.01    0.26 
  -5  -9  -4    0.69    0.36 
  -5  -9  -4    0.18    0.44 
   5  -9   4   -0.50    0.40 
   5   9   4    0.14    0.42 
   5   9   4    0.19    0.27 
  -5   9  -4    0.77    0.50 
  -5   9  -4    0.17    0.34 
   5   9   4    0.68    0.26 
   5   9   4    1.37    0.46 
  -5   9  -4    0.95    0.36 
  -6  -9  -4    1.42    0.35 
   6  -9   4    0.89    0.35 
   6  -9   4    2.22    0.62 
  -6  -9  -4    1.00    0.30 
  -6  -9  -4    1.56    0.49 
  -6  -9  -4    0.92    0.56 
   6   9   4    1.09    0.35 
  -6   9  -4    0.32    0.45 
  -6   9  -4    1.16    0.42 
   6   9   4    0.91    0.46 
  -6   9  -4    0.90    0.64 
   6   9   4    1.19    0.60 
  -6   9  -4    0.64    0.33 
   6   9   4    0.96    0.35 
   6 -10  -4   -0.03    0.41 
  -6 -10   4   -0.25    0.24 
   6 -10  -4   -0.51    0.78 
  -6 -10   4    0.51    0.79 
   6  10  -4    0.19    0.59 
  -6  10   4    0.16    0.57 
  -6  10   4   -0.04    0.48 
   6  10  -4    0.14    0.39 
   6  10  -4    0.41    0.43 
   5 -10  -4    0.48    0.34 
  -5 -10   4    0.52    0.65 
  -5 -10   4   -0.06    0.22 
   5 -10  -4   -0.20    0.62 
  -5 -10   4    0.58    0.32 
  -5 -10   4    0.27    0.39 
   5  10  -4    0.20    0.34 
  -5  10   4   -0.28    0.63 
   5  10  -4    1.04    0.54 
   5  10  -4    0.58    0.32 
  -5  10   4    0.26    0.41 
  -5  10   4    0.57    0.48 
   5  10  -4    0.59    0.50 
  -4 -10   4    0.06    0.26 
   4 -10  -4   -0.82    0.43 
  -4 -10   4    0.06    0.32 
   4 -10  -4    0.44    0.30 
  -4 -10   4    0.84    0.59 
  -4  10   4   -0.23    0.57 
   4  10  -4    0.05    0.29 
   4  10  -4    0.74    0.42 
   4  10  -4    0.27    0.45 
   4  10  -4   -0.18    0.23 
  -4  10   4   -0.07    0.38 
  -3 -10   4    0.16    0.27 
   3 -10  -4    0.13    0.38 
   3 -10  -4   -0.08    0.25 
  -3 -10   4    0.02    0.23 
   3  10  -4    0.21    0.39 
   3  10  -4   -0.96    0.38 
  -3  10   4    0.09    0.49 
   3  10  -4    0.28    0.20 
  -3  10   4   -0.11    0.31 
   3  10  -4   -0.02    0.26 
   2 -10  -4    1.06    0.27 
  -2 -10   4    1.04    0.27 
   2 -10  -4    1.28    0.38 
  -2 -10   4    0.53    0.50 
  -2 -10   4    0.99    0.24 
  -2  10   4    1.06    0.32 
  -2  10   4    0.50    0.51 
   2  10  -4    0.90    0.34 
   2  10  -4   -0.31    0.39 
   2  10  -4    1.22    0.29 
  -1 -10   4    2.32    0.51 
  -1 -10   4    2.39    0.30 
   1 -10  -4    2.13    0.47 
   1 -10  -4    2.24    0.29 
   1  10  -4    2.27    0.33 
   1  10  -4    2.36    0.46 
  -1  10   4    2.66    0.50 
  -1  10   4    2.92    0.37 
   0 -10  -4   16.69    0.58 
   0 -10   4   17.67    1.00 
   0 -10   4   18.60    0.71 
   0 -10  -4   18.85    0.68 
   0 -10  -4   18.89    0.99 
   0  10   4   17.98    1.08 
   0  10  -4   19.47    0.74 
   0  10   4   18.51    0.73 
   0  10  -4   20.09    1.05 
   0  10  -4   16.28    0.81 
   0  10   4   14.69    0.85 
   1 -10   4   -0.06    0.38 
  -1 -10  -4   -0.11    0.19 
   1 -10   4    0.12    0.22 
  -1 -10  -4   -0.19    0.38 
  -1  10  -4    0.20    0.33 
   1  10   4   -0.28    0.38 
   1  10   4    0.09    0.23 
  -1  10  -4   -0.19    0.39 
   2 -10   4    0.46    0.41 
   2 -10   4    0.50    0.24 
  -2 -10  -4    0.66    0.41 
  -2 -10  -4   -0.25    0.20 
  -2  10  -4    0.36    0.29 
   2  10   4   -0.08    0.23 
   2  10   4    0.40    0.43 
  -2  10  -4   -0.13    0.40 
  -2  10  -4    0.48    0.42 
   2  10   4   -0.12    0.34 
  -3 -10  -4    0.32    0.24 
   3 -10   4   -0.12    0.41 
  -3 -10  -4    0.66    0.28 
  -3 -10  -4    1.16    0.48 
   3 -10   4    0.29    0.21 
  -3  10  -4    0.08    0.48 
   3  10   4    0.25    0.46 
   3  10   4    0.53    0.41 
  -3  10  -4    0.71    0.35 
   3  10   4    0.49    0.27 
  -3  10  -4    0.36    0.35 
   4 -10   4   -0.12    0.45 
  -4 -10  -4    0.11    0.50 
  -4 -10  -4    0.28    0.26 
  -4 -10  -4    0.06    0.23 
   4 -10   4   -0.95    0.38 
  -4 -10  -4    0.01    0.32 
   4  10   4    0.11    0.24 
  -4  10  -4   -0.02    0.38 
   4  10   4   -0.69    0.47 
   4  10   4   -0.26    0.29 
  -4  10  -4   -0.09    0.36 
   4  10   4    1.07    0.49 
  -4  10  -4   -0.45    0.52 
  -5 -10  -4   -0.40    0.30 
  -5 -10  -4   -0.05    0.41 
  -5 -10  -4    0.22    0.57 
  -5 -10  -4    0.03    0.26 
   5 -10   4    0.07    0.35 
   5 -10   4    0.25    0.54 
   5  10   4    0.20    0.57 
   5  10   4    0.24    0.35 
   5  10   4   -0.08    0.30 
  -5  10  -4   -0.04    0.40 
   5  10   4    0.20    0.52 
  -5  10  -4    0.40    0.44 
  -5  10  -4   -0.31    0.61 
  -6 -10  -4   -0.23    0.43 
  -6 -10  -4    0.19    0.56 
   6 -10   4    0.26    0.42 
  -6 -10  -4    0.00    0.31 
   6 -10   4    1.35    0.71 
   6  10   4   -0.16    0.40 
  -6  10  -4    0.15    0.55 
   6  10   4   -0.19    0.70 
   6  10   4    0.10    0.40 
  -6  10  -4   -0.73    0.49 
  -6  10  -4   -0.16    0.33 
  -5 -11   4    0.40    0.77 
   5 -11  -4   -1.64    0.81 
  -5 -11   4   -0.31    0.25 
   5 -11  -4   -0.28    0.44 
   5  11  -4   -0.08    0.37 
   5  11  -4    0.34    0.65 
   5  11  -4    0.93    0.65 
  -5  11   4    0.41    0.58 
  -5  11   4    0.77    0.52 
   5  11  -4    0.04    0.43 
  -4 -11   4    0.43    0.36 
  -4 -11   4    0.70    0.67 
   4 -11  -4   -0.55    0.54 
  -4 -11   4    0.36    0.38 
   4 -11  -4    0.82    0.39 
  -4  11   4   -0.56    0.74 
  -4  11   4    0.60    0.49 
   4  11  -4    1.51    0.59 
   4  11  -4    0.29    0.61 
   4  11  -4    0.75    0.31 
  -4  11   4   -0.16    0.47 
   4  11  -4    0.49    0.37 
   3 -11  -4    0.03    0.25 
   3 -11  -4   -0.02    0.29 
  -3 -11   4   -0.26    0.55 
   3 -11  -4    0.12    0.49 
  -3 -11   4    0.16    0.32 
  -3 -11   4   -0.43    0.29 
   3  11  -4   -0.33    0.33 
   3  11  -4   -0.14    0.47 
  -3  11   4    0.01    0.37 
   3  11  -4   -0.62    0.53 
  -3  11   4   -1.08    0.62 
  -3  11   4    0.44    0.42 
  -2 -11   4    5.88    0.42 
   2 -11  -4    5.41    0.42 
   2 -11  -4    5.29    0.66 
  -2 -11   4    5.53    0.55 
   2 -11  -4    5.64    0.52 
  -2 -11   4    6.26    0.74 
  -2  11   4    6.58    0.56 
   2  11  -4    3.36    0.62 
  -2  11   4    6.30    0.62 
  -2  11   4    5.23    0.77 
   2  11  -4    5.12    0.49 
   2  11  -4    5.66    0.64 
   1 -11  -4   12.46    0.96 
  -1 -11   4   13.67    0.57 
   1 -11  -4   12.66    0.67 
  -1 -11   4   12.76    1.03 
  -1 -11   4   14.06    0.67 
   1 -11  -4   13.77    0.55 
  -1  11   4   13.29    0.88 
   1  11  -4   13.30    0.73 
  -1  11   4   11.47    1.11 
   1  11  -4   13.90    0.90 
   1  11  -4   13.66    1.03 
  -1  11   4   13.15    0.74 
   0 -11   4    0.51    0.50 
   0 -11   4    1.65    0.28 
   0 -11  -4    0.63    0.48 
   0 -11  -4    1.04    0.29 
   0 -11   4    1.53    0.33 
   0 -11  -4    1.20    0.25 
   0  11   4    1.13    0.42 
   0  11  -4    1.47    0.44 
   0  11   4    1.49    0.57 
   0  11  -4    2.29    0.54 
   0  11   4    1.24    0.34 
   0  11  -4    1.53    0.36 
  -1 -11  -4    5.42    0.38 
  -1 -11  -4    5.11    0.81 
  -1 -11  -4    4.54    0.41 
   1 -11   4    5.20    0.71 
   1 -11   4    5.07    0.53 
   1 -11   4    5.25    0.44 
   1  11   4    4.97    0.65 
  -1  11  -4    4.45    0.65 
   1  11   4    5.00    0.60 
  -1  11  -4    5.37    0.57 
   1  11   4    5.27    0.53 
  -1  11  -4    5.01    0.56 
  -2 -11  -4    2.09    0.33 
   2 -11   4    1.78    0.35 
  -2 -11  -4    2.46    0.63 
  -2 -11  -4    2.70    0.34 
   2 -11   4    1.67    0.26 
   2 -11   4    2.77    0.62 
  -2  11  -4    1.99    0.51 
   2  11   4    1.99    0.37 
  -2  11  -4    3.31    0.61 
   2  11   4    2.44    0.65 
  -2  11  -4    1.88    0.42 
   2  11   4    2.06    0.46 
  -3 -11  -4    0.33    0.54 
  -3 -11  -4    0.06    0.32 
   3 -11   4   -0.43    0.49 
  -3 -11  -4   -0.46    0.26 
   3 -11   4    0.17    0.31 
   3 -11   4   -0.19    0.26 
   3  11   4   -0.20    0.30 
  -3  11  -4   -0.18    0.44 
   3  11   4    0.80    0.51 
   3  11   4    0.19    0.56 
  -3  11  -4    0.21    0.61 
  -3  11  -4    0.28    0.38 
  -4 -11  -4   -0.03    0.40 
  -4 -11  -4    0.16    0.33 
   4 -11   4    0.18    0.30 
  -4 -11  -4    1.11    0.63 
   4 -11   4    0.41    0.51 
   4 -11   4   -0.13    0.37 
  -4 -11  -4    0.25    0.28 
   4  11   4   -0.19    0.35 
   4  11   4   -1.07    0.57 
  -4  11  -4   -0.07    0.47 
   4  11   4   -0.52    0.59 
  -4  11  -4   -0.64    0.66 
  -4  11  -4    0.16    0.52 
  -5 -11  -4   -0.27    0.30 
   5 -11   4    0.37    0.65 
  -5 -11  -4    0.00    0.72 
  -5 -11  -4    0.11    0.52 
   5 -11   4   -0.71    0.42 
   5  11   4   -0.10    0.43 
   5  11   4    0.83    0.79 
   5  11   4    0.15    0.36 
  -5  11  -4    0.08    0.54 
   5  11   4   -0.82    0.63 
  -5  11  -4   -0.06    0.57 
   4 -12  -4    0.90    0.47 
   4 -12  -4    0.16    0.76 
  -4 -12   4    1.03    0.94 
   4  12  -4    0.82    0.47 
  -4  12   4    0.06    0.64 
  -4  12   4    1.86    0.67 
   4  12  -4    1.71    0.78 
  -3 -12   4    0.20    0.74 
  -3 -12   4    1.24    0.45 
  -3 -12   4    1.06    0.43 
   3 -12  -4    0.78    0.41 
   3 -12  -4    0.76    0.62 
   3 -12  -4    1.33    0.33 
   3  12  -4    0.55    0.70 
   3  12  -4    1.77    0.58 
  -3  12   4   -0.03    0.77 
  -3  12   4    1.37    0.53 
   3  12  -4    0.83    0.44 
  -3  12   4    1.99    0.62 
   2 -12  -4    1.01    0.61 
  -2 -12   4    1.01    0.73 
   2 -12  -4    1.53    0.43 
   2 -12  -4    1.17    0.29 
  -2 -12   4    1.12    0.40 
  -2 -12   4    2.10    0.40 
   2  12  -4    0.61    0.71 
   2  12  -4    2.33    0.54 
  -2  12   4    2.08    0.60 
  -2  12   4    2.30    0.53 
  -2  12   4    0.70    0.74 
   2  12  -4    1.71    0.46 
   1 -12  -4   -0.13    0.29 
  -1 -12   4   -0.24    0.59 
   1 -12  -4    0.12    0.33 
   1 -12  -4   -0.07    0.58 
  -1 -12   4    0.23    0.33 
  -1 -12   4    0.04    0.32 
  -1  12   4    0.26    0.63 
   1  12  -4    0.60    0.61 
  -1  12   4   -0.32    0.40 
   1  12  -4    0.53    0.53 
  -1  12   4   -0.14    0.48 
   1  12  -4   -0.29    0.38 
   0 -12  -4    0.78    0.57 
   0 -12  -4   -0.26    0.32 
   0 -12   4    0.39    0.33 
   0 -12  -4    0.63    0.33 
   0 -12   4    1.42    0.63 
   0 -12   4    0.11    0.36 
   0  12  -4    0.45    0.39 
   0  12   4    1.16    0.51 
   0  12  -4    0.85    0.53 
   0  12   4    0.48    0.39 
   0  12  -4   -0.31    0.58 
   0  12   4   -0.22    0.62 
   1 -12   4    8.48    0.94 
   1 -12   4    6.09    0.66 
  -1 -12  -4    7.69    0.60 
  -1 -12  -4    7.38    0.81 
   1 -12   4    6.35    0.45 
  -1 -12  -4    7.79    0.62 
  -1  12  -4    6.85    0.61 
   1  12   4    8.34    0.69 
  -1  12  -4    6.70    0.86 
  -1  12  -4    7.49    0.78 
   1  12   4    7.19    0.88 
   1  12   4    6.73    0.72 
  -2 -12  -4    0.19    0.36 
  -2 -12  -4    0.32    0.33 
  -2 -12  -4    0.42    0.68 
   2 -12   4    0.39    0.32 
   2 -12   4   -0.58    0.64 
   2 -12   4    0.13    0.38 
  -2  12  -4   -0.19    0.55 
  -2  12  -4    0.35    0.68 
   2  12   4   -0.21    0.47 
   2  12   4    0.29    0.38 
   2  12   4    0.12    0.70 
  -2  12  -4   -0.12    0.46 
  -3 -12  -4    0.36    0.44 
   3 -12   4   -0.74    0.57 
  -3 -12  -4    0.70    0.74 
   3 -12   4    0.16    0.43 
   3  12   4    0.15    0.43 
  -3  12  -4    1.14    0.65 
   3  12   4    0.01    0.76 
  -3  12  -4    0.24    0.52 
   4 -12   4   -0.22    0.49 
  -4 -12  -4    0.92    0.83 
  -4 -12  -4    0.39    0.52 
  -4 -12  -4   -0.02    0.31 
  -4  12  -4    0.09    0.62 
   4  12   4   -0.07    0.45 
  -4  12  -4    0.36    0.69 
   4  12   4   -2.07    0.71 
   2 -13  -4   -0.65    0.71 
  -2 -13   4   -0.56    0.85 
   2  13  -4   -0.54    0.85 
  -2  13   4    0.64    0.60 
   2  13  -4    0.16    0.52 
   1 -13  -4    2.70    0.45 
  -1 -13   4    4.00    0.84 
   1 -13  -4    2.74    0.79 
   1  13  -4    1.64    0.83 
   1  13  -4    1.83    0.55 
  -1  13   4    1.81    0.91 
  -1  13   4    2.13    0.57 
   0 -13   4   -0.54    0.75 
   0 -13   4    1.79    0.49 
   0 -13  -4    1.83    0.44 
   0 -13  -4    1.45    0.70 
   0  13  -4    1.32    0.55 
   0  13   4    1.71    0.87 
   0  13  -4    2.44    0.87 
   0  13   4    1.31    0.53 
  -1 -13  -4    7.12    0.57 
   1 -13   4    7.47    0.68 
  -1 -13  -4    7.75    1.01 
   1 -13   4    7.73    1.03 
   1  13   4    8.75    1.06 
  -1  13  -4    7.27    0.73 
   1  13   4    5.39    0.63 
   2 -13   4    0.31    0.84 
  -2 -13  -4   -0.50    0.80 
   2 -13   4    0.81    0.50 
  -2 -13  -4    0.41    0.51 
  -2  13  -4    0.50    0.61 
   2  13   4    1.77    1.00 
   2  13   4    0.72    0.56 
   9   0  -5    0.42    0.39 
  -9   0   5    0.91    0.49 
   9   0  -5    0.01    0.31 
  -9   0   5   -0.41    0.52 
   9   0  -5   -0.14    0.46 
  -9   0   5   -0.19    0.29 
  -8   0   5   -0.09    0.17 
   8   0  -5    0.08    0.35 
   8   0  -5    0.28    0.28 
   8   0  -5   -0.08    0.22 
  -8   0   5   -0.45    0.39 
  -8   0   5   -0.02    0.37 
  -7   0   5   14.78    0.86 
   7   0  -5   14.79    0.60 
   7   0  -5   15.63    0.61 
   7   0  -5   13.81    0.56 
  -7   0   5   16.02    0.58 
  -7   0   5   16.00    0.75 
   7   0  -5   16.15    0.64 
  -6   0   5   -0.06    0.13 
   6   0  -5   -0.03    0.15 
   6   0  -5    0.08    0.16 
  -6   0   5   -0.24    0.26 
  -6   0   5   -0.08    0.23 
   6   0  -5   -0.06    0.18 
   6   0  -5    0.03    0.14 
  -5   0   5    3.51    0.23 
   5   0  -5    2.93    0.19 
   5   0  -5    3.13    0.27 
  -5   0   5    3.00    0.34 
   5   0  -5    3.38    0.27 
  -5   0   5    3.42    0.34 
   5   0  -5    3.58    0.26 
   4   0  -5   -0.04    0.10 
   4   0  -5    0.03    0.10 
  -4   0   5   -0.01    0.04 
  -4   0   5    0.01    0.13 
  -4   0   5   -0.16    0.14 
  -4   0   5   -0.06    0.08 
   4   0  -5   -0.04    0.06 
   4   0  -5    0.02    0.10 
   3   0  -5    8.25    0.28 
  -3   0   5    8.27    0.26 
   3   0  -5    8.14    0.32 
   3   0  -5    8.25    0.25 
  -3   0   5    8.31    0.36 
   3   0  -5    8.71    0.32 
  -3   0   5    8.71    0.27 
   2   0  -5   -0.14    0.06 
  -2   0   5   -0.18    0.08 
   2   0  -5   -0.15    0.06 
  -2   0   5   -0.14    0.05 
   2   0  -5   -0.05    0.04 
  -2   0   5    0.02    0.05 
   2   0  -5   -0.15    0.05 
  -2   0   5   -0.10    0.05 
  -2   0   5   -0.10    0.07 
  -1   0   5    0.16    0.08 
   1   0  -5    0.16    0.06 
  -1   0   5    0.08    0.03 
  -1   0   5    0.05    0.06 
   1   0  -5    0.02    0.06 
   1   0  -5    0.07    0.05 
   1   0  -5    0.06    0.03 
   0   0   5    0.07    0.04 
   0   0  -5    0.10    0.05 
   0   0   5    0.16    0.06 
   0   0   5    0.18    0.06 
   0   0  -5    0.11    0.05 
   0   0   5    0.14    0.05 
   0   0   5    0.14    0.03 
   0   0  -5    0.14    0.05 
  -1   0  -5    0.88    0.07 
   1   0   5    0.88    0.10 
   1   0   5    1.03    0.08 
  -1   0  -5    0.79    0.08 
  -1   0  -5    0.78    0.06 
   1   0   5    1.03    0.09 
   2   0   5    0.01    0.06 
  -2   0  -5    0.06    0.06 
   2   0   5   -0.04    0.06 
  -2   0  -5   -0.01    0.06 
   3   0   5   10.18    0.36 
  -3   0  -5    9.96    0.32 
   3   0   5   10.06    0.32 
  -3   0  -5    9.86    0.34 
   3   0   5   10.07    0.33 
  -4   0  -5   -0.09    0.09 
   4   0   5   -0.16    0.08 
   4   0   5   -0.03    0.15 
   4   0   5    0.04    0.11 
  -4   0  -5   -0.01    0.09 
   5   0   5    6.90    0.33 
  -5   0  -5    7.13    0.34 
   5   0   5    7.43    0.35 
   6   0   5    0.05    0.20 
  -6   0  -5    0.15    0.15 
   6   0   5    0.01    0.15 
   7   0   5    0.66    0.30 
  -7   0  -5    0.30    0.28 
   7   0   5    0.09    0.16 
  -8   0  -5   -0.23    0.25 
   8   0   5   -0.01    0.39 
   9  -1  -5    0.55    0.33 
  -9  -1   5    0.59    0.54 
  -9  -1   5   -0.26    0.28 
  -9  -1   5    0.05    0.56 
   9  -1  -5   -0.20    0.48 
   9  -1  -5    0.00    0.39 
  -9   1   5    1.13    0.60 
   9   1  -5    0.55    0.47 
   9   1  -5    0.50    0.31 
  -9   1   5    0.43    0.29 
   9   1  -5    0.53    0.36 
  -9   1   5   -0.37    0.53 
   8  -1  -5    2.40    0.32 
  -8  -1   5    2.14    0.28 
   8  -1  -5    3.23    0.38 
   8  -1  -5    2.55    0.38 
  -8  -1   5    2.01    0.47 
   8   1  -5    2.38    0.31 
  -8   1   5    2.67    0.36 
  -8   1   5    0.71    0.42 
   8   1  -5    2.52    0.34 
   8   1  -5    2.63    0.40 
  -8   1   5    2.88    0.46 
  -7  -1   5    3.05    0.51 
   7  -1  -5    2.72    0.30 
   7  -1  -5    3.01    0.28 
  -7  -1   5    2.92    0.29 
   7  -1  -5    2.85    0.33 
  -7  -1   5    3.32    0.40 
  -7   1   5    3.09    0.30 
   7   1  -5    2.59    0.29 
  -7   1   5    3.35    0.40 
   7   1  -5    3.07    0.33 
   7   1  -5    3.51    0.36 
   7   1  -5    3.19    0.26 
  -6  -1   5   35.67    1.08 
   6  -1  -5   33.54    0.96 
   6  -1  -5   32.77    0.96 
  -6  -1   5   32.14    1.15 
  -6  -1   5   32.25    0.93 
   6  -1  -5   33.76    0.96 
   6  -1  -5   33.80    0.88 
   6   1  -5   34.40    0.96 
  -6   1   5   36.01    1.07 
   6   1  -5   33.77    0.85 
  -6   1   5   35.14    1.18 
  -6   1   5   33.35    0.94 
   6   1  -5   32.23    0.93 
   6   1  -5   32.58    0.97 
   5  -1  -5    1.25    0.18 
  -5  -1   5    1.46    0.23 
   5  -1  -5    1.43    0.15 
   5  -1  -5    1.18    0.17 
  -5  -1   5    1.36    0.16 
   5  -1  -5    1.26    0.19 
   5   1  -5    1.16    0.18 
  -5   1   5    1.03    0.25 
   5   1  -5    1.40    0.11 
   5   1  -5    1.20    0.18 
  -5   1   5    1.57    0.24 
   5   1  -5    1.28    0.19 
  -5   1   5    1.04    0.15 
   5   1  -5    1.45    0.11 
  -4  -1   5   29.69    0.87 
  -4  -1   5   28.65    0.77 
  -4  -1   5   28.73    0.80 
   4  -1  -5   28.77    0.80 
   4  -1  -5   28.58    0.80 
  -4  -1   5   28.77    0.75 
   4  -1  -5   29.86    0.77 
   4   1  -5   28.18    0.78 
  -4   1   5   27.56    0.75 
   4   1  -5   29.52    0.68 
  -4   1   5   27.77    0.94 
   4   1  -5   29.33    0.76 
  -4   1   5   29.21    0.68 
   4   1  -5   28.49    0.82 
  -4   1   5   28.95    0.84 
   4   1  -5   28.44    0.72 
  -3  -1   5    7.73    0.24 
   3  -1  -5    7.79    0.30 
  -3  -1   5    7.51    0.27 
   3  -1  -5    7.43    0.27 
  -3  -1   5    8.02    0.35 
   3  -1  -5    7.52    0.31 
  -3  -1   5    6.87    0.25 
  -3  -1   5    7.65    0.29 
   3   1  -5    7.62    0.32 
   3   1  -5    7.73    0.19 
   3   1  -5    7.36    0.26 
  -3   1   5    7.68    0.25 
   3   1  -5    7.50    0.26 
   3   1  -5    7.58    0.29 
  -3   1   5    6.95    0.39 
  -3   1   5    7.13    0.23 
  -3   1   5    7.48    0.33 
   2  -1  -5    6.77    0.26 
  -2  -1   5    7.09    0.22 
  -2  -1   5    6.88    0.19 
  -2  -1   5    6.91    0.30 
   2  -1  -5    7.25    0.27 
  -2  -1   5    6.99    0.25 
  -2  -1   5    6.84    0.26 
   2  -1  -5    6.45    0.22 
  -2   1   5    7.06    0.28 
   2   1  -5    6.85    0.24 
  -2   1   5    6.97    0.23 
   2   1  -5    6.83    0.28 
  -2   1   5    6.96    0.34 
   2   1  -5    6.61    0.25 
   2   1  -5    6.69    0.21 
   2   1  -5    6.85    0.20 
  -1  -1   5    0.80    0.04 
  -1  -1   5    0.68    0.07 
  -1  -1   5    0.86    0.06 
  -1  -1   5    0.74    0.10 
   1  -1  -5    0.88    0.09 
  -1  -1   5    0.72    0.10 
   1   1  -5    0.77    0.04 
   1   1  -5    0.64    0.09 
  -1   1   5    0.66    0.11 
   1   1  -5    0.66    0.08 
   1   1  -5    0.54    0.05 
   1   1  -5    0.65    0.08 
  -1   1   5    0.78    0.10 
   0  -1   5   48.15    1.11 
   0  -1  -5   50.74    1.14 
   0  -1   5   46.66    1.15 
   0  -1   5   49.74    1.20 
   0  -1   5   48.98    1.20 
   0  -1  -5   48.92    1.16 
   0  -1  -5   49.27    1.22 
   0   1  -5   50.35    1.15 
   0   1  -5   48.13    1.19 
   0   1  -5   49.03    1.20 
   0   1   5   50.64    1.17 
   0   1  -5   51.99    1.11 
   0   1  -5   49.85    1.13 
   0   1   5   45.20    1.21 
   1  -1   5  134.84    3.10 
  -1  -1  -5  138.14    3.05 
   1  -1   5  138.68    3.14 
  -1  -1  -5  131.91    3.07 
   1  -1   5  138.41    3.06 
   1  -1   5  136.26    3.06 
  -1   1  -5  135.70    3.09 
   1   1   5  137.51    3.04 
   1   1   5  125.28    3.08 
   1   1   5  134.99    3.06 
   1   1   5  138.68    3.07 
  -1   1  -5  138.42    3.13 
  -1   1  -5  134.57    3.06 
   2  -1   5    2.05    0.09 
   2  -1   5    2.17    0.14 
  -2  -1  -5    1.96    0.13 
   2  -1   5    1.81    0.16 
   2  -1   5    2.14    0.13 
  -2  -1  -5    1.98    0.13 
  -2   1  -5    2.20    0.08 
  -2   1  -5    2.10    0.11 
  -2   1  -5    2.08    0.14 
  -2   1  -5    2.05    0.15 
   2   1   5    2.09    0.11 
  -2   1  -5    2.00    0.12 
   2   1   5    2.10    0.09 
   2   1   5    1.97    0.14 
   2   1   5    1.98    0.07 
   3  -1   5    3.95    0.13 
   3  -1   5    4.19    0.22 
  -3  -1  -5    3.83    0.20 
  -3  -1  -5    4.07    0.19 
   3  -1   5    4.00    0.16 
   3  -1   5    4.18    0.22 
  -3   1  -5    3.78    0.14 
   3   1   5    3.93    0.22 
   3   1   5    3.85    0.19 
  -3   1  -5    4.05    0.12 
  -3   1  -5    3.84    0.20 
   3   1   5    3.85    0.21 
   4  -1   5    8.08    0.21 
   4  -1   5    8.14    0.33 
  -4  -1  -5    8.03    0.30 
  -4  -1  -5    7.48    0.32 
   4  -1   5    8.10    0.23 
   4   1   5    8.31    0.34 
   4   1   5    7.83    0.31 
  -4   1  -5    7.41    0.32 
   4   1   5    7.25    0.33 
   5  -1   5    0.19    0.18 
  -5  -1  -5    0.16    0.13 
   5  -1   5    0.30    0.06 
   5  -1   5    0.34    0.06 
   5  -1   5    0.27    0.13 
  -5  -1  -5    0.26    0.13 
  -5   1  -5    0.28    0.14 
   5   1   5    0.17    0.15 
   5   1   5    0.31    0.13 
  -6  -1  -5    5.71    0.35 
   6  -1   5    5.63    0.41 
   6  -1   5    5.74    0.17 
   6  -1   5    5.90    0.18 
   6  -1   5    5.80    0.32 
   6   1   5    6.10    0.40 
  -6   1  -5    5.78    0.34 
   6   1   5    5.35    0.33 
   7  -1   5    0.58    0.31 
   7  -1   5    0.25    0.16 
   7   1   5    0.46    0.18 
   7   1   5    0.23    0.28 
  -8  -1  -5   -0.10    0.25 
   8  -1   5   -0.01    0.43 
  -8   1  -5   -0.10    0.25 
   8   1   5   -0.12    0.40 
   8   1   5    0.05    0.18 
  -9  -2   5    1.57    0.32 
  -9  -2   5    1.43    0.66 
   9  -2  -5    1.86    0.44 
  -9  -2   5    1.44    0.59 
   9  -2  -5    1.42    0.54 
   9  -2  -5    1.31    0.34 
  -9   2   5    1.12    0.57 
   9   2  -5    1.86    0.50 
   9   2  -5    1.35    0.39 
  -9   2   5    1.27    0.35 
   9   2  -5    1.35    0.36 
  -9   2   5    1.86    0.62 
   8  -2  -5    7.94    0.62 
  -8  -2   5    7.58    0.46 
   8  -2  -5    7.61    0.66 
   8  -2  -5    8.16    0.53 
  -8  -2   5    9.35    0.87 
   8   2  -5    7.98    0.57 
  -8   2   5    8.93    0.82 
   8   2  -5    9.02    0.55 
   8   2  -5    8.01    0.65 
   7  -2  -5    0.46    0.18 
  -7  -2   5    0.78    0.36 
   7  -2  -5    0.84    0.29 
  -7  -2   5    0.75    0.19 
   7  -2  -5    0.87    0.26 
  -7   2   5    0.46    0.16 
   7   2  -5    0.44    0.21 
   7   2  -5    0.73    0.21 
   7   2  -5    0.75    0.24 
   7   2  -5    0.52    0.25 
  -7   2   5    0.64    0.32 
   6  -2  -5   27.19    0.82 
   6  -2  -5   26.12    0.84 
   6  -2  -5   27.25    0.82 
   6  -2  -5   27.73    0.77 
  -6  -2   5   26.30    0.94 
  -6  -2   5   26.75    0.84 
  -6  -2   5   26.74    0.79 
  -6   2   5   26.36    1.06 
  -6   2   5   27.48    0.81 
   6   2  -5   26.56    0.81 
   6   2  -5   26.86    0.78 
   6   2  -5   25.88    0.84 
   6   2  -5   26.79    0.69 
   6   2  -5   27.38    0.69 
  -6   2   5   28.41    0.92 
  -5  -2   5    0.74    0.13 
  -5  -2   5    0.91    0.22 
  -5  -2   5    0.58    0.15 
   5  -2  -5    0.71    0.15 
   5  -2  -5    0.74    0.18 
  -5  -2   5    0.99    0.18 
   5  -2  -5    0.79    0.18 
   5   2  -5    0.66    0.16 
  -5   2   5    0.90    0.21 
   5   2  -5    0.91    0.12 
   5   2  -5    0.58    0.16 
  -5   2   5    0.83    0.15 
   5   2  -5    0.72    0.15 
   5   2  -5    0.88    0.10 
  -5   2   5    1.46    0.24 
  -4  -2   5   17.09    0.51 
   4  -2  -5   17.32    0.56 
  -4  -2   5   17.85    0.63 
   4  -2  -5   16.86    0.53 
  -4  -2   5   16.25    0.48 
  -4  -2   5   16.76    0.53 
  -4   2   5   16.44    0.66 
  -4   2   5   16.74    0.50 
  -4   2   5   16.43    0.43 
   4   2  -5   16.89    0.50 
   4   2  -5   16.03    0.57 
  -4   2   5   16.82    0.58 
   4   2  -5   17.14    0.50 
   4   2  -5   17.64    0.53 
   3  -2  -5    1.54    0.16 
  -3  -2   5    1.76    0.16 
  -3  -2   5    1.83    0.12 
  -3  -2   5    2.01    0.16 
  -3  -2   5    1.87    0.15 
  -3  -2   5    1.85    0.20 
   3  -2  -5    1.69    0.22 
   3   2  -5    1.81    0.16 
  -3   2   5    1.94    0.20 
   3   2  -5    1.69    0.17 
   3   2  -5    1.92    0.20 
  -3   2   5    1.91    0.23 
   3   2  -5    1.87    0.15 
  -2  -2   5   30.04    0.87 
   2  -2  -5   31.08    0.93 
  -2  -2   5   31.19    0.81 
  -2  -2   5   31.82    0.77 
   2  -2  -5   31.85    0.82 
  -2  -2   5   31.22    0.84 
   2   2  -5   31.60    0.83 
  -2   2   5   32.21    0.83 
   2   2  -5   31.64    0.86 
   2   2  -5   32.60    0.76 
   2   2  -5   30.79    0.81 
   2   2  -5   31.14    0.75 
  -1  -2   5    2.73    0.11 
   1  -2  -5    2.74    0.22 
  -1  -2   5    2.71    0.18 
   1  -2  -5    2.75    0.14 
  -1  -2   5    2.70    0.09 
  -1  -2   5    2.65    0.14 
  -1  -2   5    3.01    0.20 
   1   2  -5    2.70    0.18 
   1   2  -5    2.74    0.17 
   1   2  -5    2.78    0.11 
  -1   2   5    3.20    0.20 
  -1   2   5    2.89    0.16 
   1   2  -5    2.77    0.15 
   0  -2  -5    0.27    0.09 
   0  -2  -5    0.30    0.03 
   0  -2   5    0.26    0.09 
   0  -2  -5    0.23    0.05 
   0  -2   5    0.24    0.06 
   0  -2   5    0.25    0.04 
   0  -2   5    0.36    0.05 
   0  -2   5    0.25    0.08 
   0   2  -5    0.21    0.07 
   0   2   5    0.25    0.06 
   0   2   5    0.23    0.08 
   0   2  -5    0.30    0.08 
   0   2  -5    0.27    0.06 
  -1  -2  -5  143.03    3.19 
   1  -2   5  142.03    3.29 
   1  -2   5  142.20    3.29 
  -1  -2  -5  139.30    3.27 
   1  -2   5  138.68    3.21 
  -1  -2  -5  137.77    3.21 
  -1  -2  -5  143.12    3.20 
   1  -2   5  146.70    3.20 
  -1   2  -5  146.74    3.20 
   1   2   5  140.62    3.21 
  -1   2  -5  140.88    3.27 
  -1   2  -5  140.62    3.21 
   1   2   5  144.18    3.27 
   1   2   5  141.47    3.18 
  -1   2  -5  140.72    3.28 
  -2  -2  -5  327.98    7.60 
  -2  -2  -5  346.74    7.65 
   2  -2   5  351.81    7.76 
   2  -2   5  346.67    7.66 
  -2  -2  -5  343.90    7.60 
   2  -2   5  348.93    7.68 
   2  -2   5  342.79    7.60 
   2   2   5  343.32    7.64 
   2   2   5  299.19    7.63 
  -2   2  -5  339.79    7.66 
  -2   2  -5  329.18    7.64 
  -2   2  -5  354.10    7.62 
   2   2   5  335.52    7.61 
   3  -2   5    2.05    0.17 
  -3  -2  -5    2.50    0.11 
   3  -2   5    2.08    0.19 
  -3  -2  -5    2.11    0.16 
  -3  -2  -5    2.05    0.16 
   3  -2   5    2.04    0.17 
  -3  -2  -5    2.04    0.08 
   3   2   5    2.16    0.19 
  -3   2  -5    2.07    0.17 
   3   2   5    1.95    0.15 
   3   2   5    2.02    0.12 
  -3   2  -5    2.18    0.17 
   3   2   5    2.20    0.09 
  -3   2  -5    2.08    0.17 
   4  -2   5   37.53    0.96 
  -4  -2  -5   34.53    0.97 
   4  -2   5   36.73    0.98 
  -4  -2  -5   34.68    0.93 
   4  -2   5   37.92    0.87 
   4   2   5   37.53    0.83 
  -4   2  -5   35.74    0.93 
  -4   2  -5   37.06    0.88 
   4   2   5   35.87    0.94 
  -4   2  -5   35.14    0.97 
   4   2   5   36.72    0.84 
   4   2   5   36.50    0.91 
  -4   2  -5   37.30    0.96 
   5  -2   5    1.20    0.18 
   5  -2   5    1.19    0.11 
  -5  -2  -5    1.03    0.16 
  -5  -2  -5    1.37    0.20 
   5   2   5    1.11    0.18 
  -5   2  -5    1.14    0.14 
  -5   2  -5    1.21    0.11 
  -5   2  -5    0.98    0.17 
   5   2   5    1.39    0.19 
   6  -2   5    2.97    0.28 
  -6  -2  -5    2.70    0.23 
   6  -2   5    3.68    0.33 
   6  -2   5    3.14    0.21 
  -6  -2  -5    2.92    0.29 
   6  -2   5    3.19    0.19 
   6   2   5    3.82    0.30 
  -6   2  -5    3.18    0.31 
   6   2   5    2.86    0.32 
  -6   2  -5    3.44    0.23 
  -6   2  -5    2.88    0.19 
   7  -2   5    0.01    0.30 
   7  -2   5    0.03    0.10 
   7  -2   5   -0.02    0.12 
   7  -2   5   -0.03    0.14 
   7   2   5   -0.27    0.19 
   7   2   5    0.00    0.28 
  -8  -2  -5    0.40    0.28 
   8  -2   5    0.44    0.43 
  -8   2  -5    0.53    0.26 
   8   2   5    0.11    0.39 
   8   2   5    0.50    0.24 
  -9  -3   5   -0.56    0.67 
   9  -3  -5    0.66    0.35 
   9  -3  -5    0.24    0.52 
   9  -3  -5    0.99    0.47 
  -9  -3   5    0.89    0.32 
  -9  -3   5   -0.15    0.60 
  -9   3   5   -0.46    0.63 
   9   3  -5    0.28    0.48 
  -9   3   5    0.64    0.32 
  -9   3   5    0.93    0.61 
   9   3  -5    0.42    0.36 
   9   3  -5    0.65    0.39 
   8  -3  -5    5.33    0.51 
   8  -3  -5    5.94    0.64 
  -8  -3   5    5.83    0.63 
  -8  -3   5    5.06    0.40 
   8  -3  -5    4.66    0.47 
   8   3  -5    5.82    0.55 
   8   3  -5    5.01    0.53 
  -8   3   5    6.41    0.49 
  -8   3   5    5.73    0.64 
   8   3  -5    5.59    0.48 
   7  -3  -5    0.17    0.19 
   7  -3  -5   -0.03    0.28 
  -7  -3   5    0.81    0.35 
   7  -3  -5    0.42    0.29 
  -7  -3   5    0.23    0.17 
   7   3  -5    0.46    0.12 
   7   3  -5    0.40    0.24 
  -7   3   5    0.26    0.17 
   7   3  -5    0.17    0.27 
   7   3  -5    0.02    0.21 
  -7   3   5    0.46    0.33 
   6  -3  -5   16.63    0.66 
   6  -3  -5   16.19    0.59 
  -6  -3   5   14.06    0.67 
  -6  -3   5   15.80    0.75 
  -6  -3   5   16.02    0.54 
  -6   3   5   16.86    0.70 
  -6   3   5   16.69    0.76 
  -6   3   5   15.79    0.57 
   6   3  -5   15.94    0.58 
   6   3  -5   16.46    0.53 
   6   3  -5   15.41    0.62 
   5  -3  -5    0.23    0.14 
  -5  -3   5    0.47    0.24 
  -5  -3   5    0.46    0.15 
   5  -3  -5    0.16    0.17 
  -5  -3   5    0.45    0.12 
  -5  -3   5    0.34    0.17 
  -5   3   5    0.61    0.22 
  -5   3   5    0.30    0.14 
   5   3  -5    0.21    0.14 
  -5   3   5    0.33    0.19 
   5   3  -5    0.48    0.19 
   5   3  -5    0.45    0.13 
   5   3  -5    0.18    0.15 
   4  -3  -5    6.99    0.32 
  -4  -3   5    7.25    0.32 
  -4  -3   5    6.68    0.31 
  -4  -3   5    7.24    0.44 
   4  -3  -5    7.27    0.46 
   4   3  -5    7.06    0.32 
  -4   3   5    6.76    0.36 
   4   3  -5    6.57    0.32 
   4   3  -5    7.08    0.37 
  -4   3   5    6.49    0.42 
   4   3  -5    7.12    0.30 
  -3  -3   5    0.05    0.08 
   3  -3  -5    0.26    0.18 
   3  -3  -5    0.18    0.09 
  -3  -3   5    0.20    0.10 
  -3  -3   5    0.22    0.03 
  -3  -3   5    0.37    0.16 
  -3  -3   5    0.12    0.09 
   3   3  -5    0.19    0.09 
   3   3  -5    0.12    0.10 
  -3   3   5    0.22    0.15 
  -3   3   5    0.19    0.12 
   3   3  -5    0.09    0.11 
   3   3  -5    0.02    0.10 
   2  -3  -5    7.53    0.41 
  -2  -3   5    7.60    0.29 
  -2  -3   5    7.19    0.32 
  -2  -3   5    7.52    0.37 
  -2  -3   5    6.93    0.24 
   2  -3  -5    7.32    0.28 
   2   3  -5    7.48    0.32 
   2   3  -5    7.40    0.29 
   2   3  -5    7.47    0.24 
  -2   3   5    7.64    0.31 
  -2   3   5    7.65    0.37 
   2   3  -5    7.67    0.35 
   1  -3  -5    0.05    0.06 
  -1  -3   5    0.11    0.12 
  -1  -3   5   -0.03    0.05 
  -1  -3   5   -0.08    0.07 
  -1  -3   5   -0.02    0.06 
   1  -3  -5    0.03    0.11 
   1   3  -5    0.06    0.07 
  -1   3   5    0.03    0.07 
   1   3  -5    0.05    0.05 
  -1   3   5    0.13    0.09 
   1   3  -5    0.06    0.09 
   1   3  -5    0.00    0.07 
   0  -3  -5   11.38    0.28 
   0  -3   5   10.89    0.42 
   0  -3   5   11.66    0.35 
   0  -3   5   11.75    0.41 
   0  -3   5   11.17    0.30 
   0  -3  -5   11.65    0.34 
   0  -3  -5   11.45    0.41 
   0   3  -5   11.41    0.35 
   0   3  -5   11.25    0.42 
   0   3  -5   10.80    0.40 
   0   3   5   11.29    0.42 
   0   3   5   11.17    0.34 
   1  -3   5    7.15    0.32 
  -1  -3  -5    6.64    0.19 
   1  -3   5    6.36    0.30 
  -1  -3  -5    6.65    0.29 
   1  -3   5    6.46    0.23 
  -1  -3  -5    6.77    0.22 
  -1   3  -5    6.79    0.31 
   1   3   5    6.56    0.30 
   1   3   5    6.55    0.23 
   1   3   5    6.72    0.18 
  -1   3  -5    6.33    0.29 
  -1   3  -5    6.75    0.24 
  -2  -3  -5  180.25    4.06 
   2  -3   5  181.68    4.06 
  -2  -3  -5  180.37    4.03 
   2  -3   5  180.04    4.16 
  -2  -3  -5  154.52    4.10 
   2  -3   5  180.98    4.16 
  -2  -3  -5  181.22    4.04 
  -2   3  -5  181.62    4.07 
  -2   3  -5  179.15    4.15 
   2   3   5  179.53    4.02 
  -2   3  -5  184.63    4.15 
  -2   3  -5  178.77    4.06 
   2   3   5  183.26    4.05 
   2   3   5  182.14    4.12 
  -3  -3  -5   19.01    0.53 
  -3  -3  -5   17.17    0.62 
   3  -3   5   19.14    0.61 
  -3  -3  -5   19.09    0.52 
  -3  -3  -5   19.38    0.48 
   3  -3   5   20.09    0.61 
   3  -3   5   18.94    0.55 
   3  -3   5   19.38    0.51 
   3   3   5   19.41    0.50 
  -3   3  -5   19.09    0.51 
  -3   3  -5   18.86    0.58 
   3   3   5   19.20    0.49 
  -3   3  -5   18.72    0.60 
  -3   3  -5   18.18    0.55 
  -4  -3  -5   32.04    0.82 
   4  -3   5   32.60    0.91 
   4  -3   5   32.69    0.90 
  -4  -3  -5   32.35    0.77 
  -4  -3  -5   32.89    0.84 
   4  -3   5   32.05    0.80 
   4   3   5   32.27    0.77 
  -4   3  -5   32.15    0.90 
  -4   3  -5   32.65    0.88 
   4   3   5   31.81    0.81 
  -4   3  -5   30.33    0.87 
   4   3   5   32.31    0.81 
  -5  -3  -5    1.10    0.10 
   5  -3   5    0.90    0.17 
   5  -3   5    0.81    0.18 
   5  -3   5    0.92    0.21 
  -5  -3  -5    1.03    0.11 
  -5  -3  -5    0.82    0.16 
   5   3   5    1.25    0.12 
  -5   3  -5    0.72    0.16 
   5   3   5    1.07    0.11 
  -5   3  -5    0.85    0.19 
  -5   3  -5    1.04    0.19 
   5   3   5    0.93    0.17 
   6  -3   5   13.06    0.49 
  -6  -3  -5   12.58    0.49 
   6  -3   5   13.06    0.41 
   6  -3   5   12.65    0.46 
   6   3   5   12.39    0.33 
  -6   3  -5   12.24    0.53 
   6   3   5   13.23    0.51 
  -6   3  -5   11.99    0.50 
   6   3   5   12.58    0.33 
   7  -3   5   -0.13    0.15 
  -7  -3  -5    0.21    0.22 
   7  -3   5   -0.07    0.37 
   7  -3   5    0.17    0.17 
   7  -3   5    0.26    0.14 
  -7   3  -5    0.27    0.20 
  -7   3  -5   -0.10    0.14 
   7   3   5    0.24    0.28 
  -7   3  -5    0.20    0.26 
   7   3   5    0.45    0.24 
   8  -3   5    0.75    0.17 
   8  -3   5    0.50    0.20 
   8  -3   5    0.85    0.48 
  -8   3  -5    0.75    0.32 
   8   3   5    0.49    0.28 
   8   3   5    0.39    0.39 
   9  -4  -5    0.30    0.52 
   9  -4  -5    0.25    0.60 
  -9  -4   5   -1.04    0.69 
   9  -4  -5    0.73    0.37 
   9   4  -5    0.50    0.48 
  -9   4   5    0.04    0.77 
   9   4  -5    0.40    0.55 
  -9   4   5   -0.11    0.32 
   9   4  -5    0.36    0.41 
  -9   4   5    0.06    0.99 
   8  -4  -5    2.50    0.46 
  -8  -4   5    2.18    0.56 
   8  -4  -5    2.23    0.45 
   8  -4  -5    2.39    0.35 
  -8   4   5    2.42    0.56 
  -8   4   5    2.85    0.38 
   8   4  -5    3.16    0.30 
   8   4  -5    2.88    0.40 
   8   4  -5    1.74    0.39 
   8   4  -5    2.82    0.37 
  -7  -4   5    0.09    0.39 
  -7  -4   5    1.44    0.32 
  -7  -4   5    1.70    0.34 
   7  -4  -5    1.55    0.26 
   7  -4  -5    1.57    0.35 
   7  -4  -5    1.28    0.35 
  -7   4   5    1.40    0.43 
   7   4  -5    1.41    0.27 
  -7   4   5    1.36    0.25 
   7   4  -5    1.44    0.31 
  -7   4   5    1.68    0.38 
   7   4  -5    1.45    0.21 
   7   4  -5    1.07    0.29 
   6  -4  -5    2.04    0.31 
  -6  -4   5    1.95    0.36 
   6  -4  -5    1.80    0.24 
  -6  -4   5    2.46    0.28 
  -6   4   5    2.05    0.38 
   6   4  -5    2.27    0.29 
   6   4  -5    2.22    0.23 
  -6   4   5    2.49    0.35 
   6   4  -5    2.21    0.26 
  -6   4   5    2.10    0.25 
  -5  -4   5    0.72    0.19 
  -5  -4   5    0.44    0.26 
  -5  -4   5    0.56    0.16 
   5  -4  -5    0.59    0.17 
   5  -4  -5    0.85    0.28 
  -5   4   5    0.69    0.23 
  -5   4   5    0.60    0.25 
   5   4  -5    0.33    0.18 
  -5   4   5    0.45    0.10 
   5   4  -5    0.75    0.18 
   5   4  -5    0.53    0.17 
   5   4  -5    0.84    0.19 
  -4  -4   5   18.26    0.58 
   4  -4  -5   19.18    0.80 
  -4  -4   5   18.09    0.45 
   4  -4  -5   17.65    0.58 
  -4  -4   5   18.45    0.55 
  -4  -4   5   18.22    0.72 
   4   4  -5   18.24    0.53 
   4   4  -5   17.57    0.61 
   4   4  -5   18.33    0.67 
  -4   4   5   18.46    0.64 
   4   4  -5   17.79    0.58 
  -4   4   5   17.34    0.73 
   3  -4  -5   19.82    0.77 
  -3  -4   5   19.76    0.55 
  -3  -4   5   19.54    0.47 
  -3  -4   5   20.35    0.60 
  -3  -4   5   17.11    0.70 
   3  -4  -5   18.69    0.59 
  -3   4   5   22.30    0.64 
  -3   4   5   18.73    0.72 
   3   4  -5   19.08    0.53 
   3   4  -5   20.21    0.68 
   3   4  -5   20.06    0.59 
   3   4  -5   19.84    0.64 
  -2  -4   5   11.14    0.38 
  -2  -4   5   10.51    0.33 
  -2  -4   5   11.38    0.44 
  -2  -4   5   10.85    0.49 
   2  -4  -5   10.94    0.52 
   2  -4  -5   10.77    0.37 
  -2   4   5   10.49    0.39 
   2   4  -5   11.30    0.33 
  -2   4   5   10.53    0.48 
   2   4  -5   10.79    0.38 
   2   4  -5   10.50    0.42 
   2   4  -5   10.88    0.46 
  -1  -4   5   39.34    1.14 
   1  -4  -5   38.40    1.12 
   1  -4  -5   39.64    1.01 
  -1  -4   5   40.89    0.95 
  -1  -4   5   39.97    1.10 
  -1  -4   5   40.26    1.01 
   1   4  -5   39.35    1.09 
   1   4  -5   39.94    1.01 
   1   4  -5   39.89    1.12 
  -1   4   5   39.94    1.14 
   1   4  -5   40.64    0.95 
  -1   4   5   40.84    1.03 
   0  -4  -5   94.47    2.21 
   0  -4  -5   95.09    2.13 
   0  -4   5   96.14    2.35 
   0  -4   5   91.95    2.30 
   0  -4   5   97.19    2.22 
   0  -4   5   93.33    2.15 
   0   4   5   91.71    2.33 
   0   4   5   93.35    2.21 
   0   4  -5   95.67    2.21 
   0   4  -5   96.04    2.33 
   0   4  -5   94.14    2.30 
   1  -4   5   20.83    0.67 
  -1  -4  -5   22.10    0.53 
   1  -4   5   22.13    0.71 
   1  -4   5   21.61    0.59 
  -1  -4  -5   22.80    0.69 
  -1  -4  -5   21.50    0.58 
  -1   4  -5   21.38    0.67 
  -1   4  -5   21.14    0.59 
   1   4   5   22.19    0.53 
   1   4   5   21.89    0.59 
   1   4   5   20.78    0.69 
  -1   4  -5   21.54    0.70 
   2  -4   5    5.53    0.33 
   2  -4   5    5.53    0.31 
  -2  -4  -5    6.05    0.31 
  -2  -4  -5    5.76    0.24 
   2  -4   5    6.19    0.24 
  -2  -4  -5    5.82    0.22 
  -2  -4  -5    6.06    0.21 
   2   4   5    5.77    0.23 
   2   4   5    6.07    0.20 
   2   4   5    5.88    0.32 
  -2   4  -5    6.10    0.32 
  -2   4  -5    5.62    0.33 
  -2   4  -5    5.96    0.25 
  -3  -4  -5    7.40    0.29 
   3  -4   5    7.58    0.39 
  -3  -4  -5    6.94    0.27 
   3  -4   5    7.46    0.37 
  -3  -4  -5    7.31    0.25 
  -3  -4  -5    7.36    0.35 
   3  -4   5    7.11    0.27 
   3   4   5    7.45    0.34 
  -3   4  -5    7.30    0.31 
  -3   4  -5    7.33    0.35 
   3   4   5    7.27    0.26 
   3   4   5    7.12    0.26 
  -3   4  -5    6.92    0.28 
  -3   4  -5    6.71    0.38 
  -4  -4  -5    8.05    0.34 
   4  -4   5    8.16    0.41 
   4  -4   5    8.10    0.30 
   4  -4   5    8.01    0.40 
  -4  -4  -5    7.88    0.28 
  -4  -4  -5    8.04    0.34 
  -4   4  -5    7.89    0.43 
  -4   4  -5    7.85    0.36 
  -4   4  -5    8.81    0.38 
   4   4   5    8.00    0.31 
   4   4   5    8.24    0.28 
  -4   4  -5    8.37    0.33 
  -5  -4  -5   -0.04    0.18 
  -5  -4  -5   -0.09    0.14 
   5  -4   5    0.12    0.10 
  -5  -4  -5   -0.06    0.09 
  -5  -4  -5   -0.29    0.13 
   5  -4   5   -0.15    0.20 
   5  -4   5    0.04    0.15 
   5   4   5    0.04    0.15 
  -5   4  -5   -0.02    0.15 
   5   4   5    0.08    0.09 
  -5   4  -5    0.04    0.14 
   5   4   5    0.04    0.12 
  -5   4  -5    0.00    0.14 
  -5   4  -5   -0.07    0.20 
   6  -4   5    7.35    0.41 
   6  -4   5    6.48    0.53 
  -6  -4  -5    6.83    0.39 
  -6  -4  -5    6.79    0.31 
   6  -4   5    7.23    0.31 
   6   4   5    6.90    0.43 
   6   4   5    7.41    0.27 
  -6   4  -5    7.06    0.41 
   6   4   5    7.07    0.31 
  -6   4  -5    6.82    0.48 
   7  -4   5    0.14    0.18 
  -7  -4  -5    0.10    0.21 
   7   4   5    0.19    0.28 
  -7   4  -5    0.36    0.34 
  -7   4  -5   -0.09    0.18 
   7   4   5   -0.11    0.29 
  -7   4  -5   -0.09    0.23 
   8  -4   5    0.68    0.22 
   8  -4   5    0.64    0.54 
   8  -4   5    0.78    0.27 
  -8   4  -5    0.13    0.24 
   8   4   5    0.49    0.36 
  -8   4  -5   -0.39    0.27 
   8   4   5    0.72    0.42 
   8   4   5    1.38    0.38 
  -8   4  -5    0.70    0.33 
   8  -5  -5   -0.14    0.47 
  -8  -5   5   -0.20    0.38 
   8  -5  -5   -0.24    0.47 
  -8  -5   5   -0.20    0.55 
   8  -5  -5   -0.36    0.29 
   8   5  -5   -0.03    0.35 
  -8   5   5    0.06    0.27 
  -8   5   5   -0.43    0.50 
   8   5  -5    0.34    0.39 
   8   5  -5    0.24    0.34 
  -8   5   5    0.67    0.59 
   8   5  -5    0.18    0.25 
   7  -5  -5    0.93    0.42 
  -7  -5   5    0.45    0.42 
   7  -5  -5    0.21    0.23 
  -7  -5   5    0.49    0.30 
  -7  -5   5    0.19    0.32 
   7   5  -5    0.23    0.29 
  -7   5   5    0.46    0.46 
  -7   5   5    0.93    0.42 
   7   5  -5    0.57    0.29 
   7   5  -5    0.95    0.26 
   7   5  -5    0.46    0.27 
  -6  -5   5    1.16    0.38 
   6  -5  -5    0.75    0.23 
   6  -5  -5    0.44    0.35 
   6   5  -5    0.34    0.23 
  -6   5   5    0.21    0.10 
   6   5  -5    0.58    0.22 
   6   5  -5    0.77    0.24 
  -6   5   5    0.45    0.18 
  -6   5   5    1.12    0.31 
   6   5  -5    0.65    0.24 
  -5  -5   5    1.48    0.32 
   5  -5  -5    0.73    0.32 
  -5  -5   5    1.23    0.11 
   5  -5  -5    0.91    0.18 
   5   5  -5    1.02    0.20 
   5   5  -5    1.28    0.22 
   5   5  -5    0.88    0.24 
  -5   5   5    1.37    0.26 
   5   5  -5    1.29    0.20 
  -5   5   5    1.40    0.17 
  -5   5   5    0.79    0.28 
  -4  -5   5    1.63    0.31 
  -4  -5   5    1.51    0.18 
  -4  -5   5    1.75    0.19 
   4  -5  -5    1.56    0.19 
   4  -5  -5    1.99    0.33 
  -4  -5   5    1.38    0.12 
  -4   5   5    1.75    0.24 
   4   5  -5    1.35    0.22 
  -4   5   5    1.82    0.20 
   4   5  -5    1.52    0.17 
   4   5  -5    1.44    0.19 
   4   5  -5    1.55    0.25 
  -4   5   5    1.60    0.29 
   3  -5  -5    8.47    0.54 
  -3  -5   5    8.13    0.35 
  -3  -5   5    8.61    0.33 
   3  -5  -5    8.67    0.36 
  -3  -5   5    8.80    0.52 
   3   5  -5    8.59    0.37 
   3   5  -5    8.28    0.43 
  -3   5   5    8.43    0.40 
   3   5  -5    8.67    0.47 
   3   5  -5    7.91    0.30 
  -3   5   5    8.29    0.51 
   2  -5  -5    2.40    0.27 
  -2  -5   5    2.90    0.27 
  -2  -5   5    2.67    0.19 
  -2  -5   5    3.32    0.33 
  -2  -5   5    2.59    0.20 
   2  -5  -5    2.50    0.20 
   2   5  -5    2.68    0.17 
   2   5  -5    3.28    0.28 
  -2   5   5    2.42    0.28 
   2   5  -5    2.63    0.21 
   2   5  -5    2.88    0.29 
  -2   5   5    2.85    0.24 
  -1  -5   5   37.49    1.10 
   1  -5  -5   39.37    1.15 
  -1  -5   5   38.40    1.01 
  -1  -5   5   38.25    0.94 
   1  -5  -5   38.99    1.00 
  -1  -5   5   39.51    1.17 
   1   5  -5   37.49    1.09 
   1   5  -5   39.34    1.14 
  -1   5   5   39.10    1.02 
  -1   5   5   39.27    1.17 
   1   5  -5   38.44    1.01 
   1   5  -5   38.92    0.93 
   0  -5  -5   14.93    0.39 
   0  -5   5   14.61    0.56 
   0  -5   5   15.22    0.41 
   0  -5  -5   14.69    0.46 
   0  -5   5   14.78    0.60 
   0  -5   5   14.87    0.47 
   0   5  -5   15.70    0.60 
   0   5  -5   15.32    0.48 
   0   5  -5   14.80    0.56 
   0   5   5   15.01    0.47 
   0   5   5   14.75    0.60 
   1  -5   5    0.67    0.11 
   1  -5   5    0.51    0.14 
   1  -5   5    0.71    0.08 
  -1  -5  -5    0.77    0.09 
   1  -5   5    0.53    0.18 
  -1  -5  -5    0.51    0.17 
  -1  -5  -5    0.60    0.09 
   1   5   5    0.74    0.08 
  -1   5  -5    0.88    0.16 
   1   5   5    0.59    0.11 
  -1   5  -5    0.67    0.13 
   1   5   5    0.92    0.19 
  -1   5  -5    0.62    0.19 
  -2  -5  -5    0.32    0.08 
  -2  -5  -5    0.25    0.09 
   2  -5   5    0.17    0.09 
   2  -5   5    0.13    0.13 
   2  -5   5    0.30    0.16 
  -2  -5  -5    0.28    0.14 
  -2   5  -5    0.50    0.17 
  -2   5  -5    0.25    0.10 
   2   5   5    0.25    0.08 
   2   5   5    0.21    0.16 
   2   5   5    0.21    0.09 
  -2   5  -5    0.23    0.13 
   3  -5   5    5.17    0.35 
  -3  -5  -5    4.78    0.35 
  -3  -5  -5    4.95    0.25 
  -3  -5  -5    4.66    0.39 
  -3  -5  -5    4.82    0.23 
   3  -5   5    5.40    0.38 
   3  -5   5    4.66    0.25 
  -3   5  -5    4.80    0.32 
   3   5   5    4.66    0.35 
  -3   5  -5    4.57    0.38 
   3   5   5    4.59    0.24 
   3   5   5    4.78    0.22 
  -3   5  -5    4.59    0.27 
   4  -5   5    0.24    0.17 
  -4  -5  -5    0.21    0.15 
  -4  -5  -5    0.22    0.09 
  -4  -5  -5    0.05    0.16 
  -4  -5  -5    0.13    0.14 
   4  -5   5    0.18    0.15 
   4  -5   5    0.25    0.11 
   4   5   5    0.22    0.11 
  -4   5  -5    0.13    0.13 
  -4   5  -5    0.38    0.18 
  -4   5  -5    0.33    0.19 
   4   5   5    0.17    0.15 
  -4   5  -5    0.32    0.15 
   4   5   5    0.16    0.13 
  -5  -5  -5    1.20    0.23 
   5  -5   5    1.28    0.27 
  -5  -5  -5    1.29    0.15 
  -5  -5  -5    1.43    0.21 
   5  -5   5    1.39    0.23 
   5  -5   5    1.33    0.16 
  -5   5  -5    1.46    0.21 
  -5   5  -5    1.44    0.28 
  -5   5  -5    1.63    0.22 
   5   5   5    1.55    0.16 
   5   5   5    1.25    0.19 
   5   5   5    1.25    0.20 
  -5   5  -5    1.30    0.21 
  -6  -5  -5    0.97    0.23 
   6  -5   5    0.87    0.17 
  -6  -5  -5    0.89    0.16 
  -6   5  -5    0.64    0.21 
  -6   5  -5    0.50    0.30 
   6   5   5    0.92    0.15 
   6   5   5    0.92    0.21 
   6   5   5    0.75    0.23 
   7  -5   5    0.31    0.34 
   7  -5   5   -0.14    0.17 
  -7  -5  -5    0.17    0.24 
   7   5   5    0.48    0.30 
  -7   5  -5    0.19    0.25 
   7   5   5    0.34    0.15 
   7   5   5    0.12    0.18 
   8  -5   5   -0.02    0.36 
  -8  -5  -5    0.18    0.30 
   8  -5   5    0.10    0.27 
   8  -5   5   -0.25    0.58 
  -8   5  -5   -0.13    0.32 
  -8   5  -5    0.12    0.41 
   8   5   5    0.21    0.41 
   8   5   5    0.57    0.43 
   8   5   5    0.45    0.44 
   8  -6  -5    0.24    0.34 
  -8  -6   5    0.04    0.44 
   8  -6  -5    0.15    0.56 
  -8  -6   5   -0.14    0.62 
   8  -6  -5   -0.18    0.54 
   8   6  -5    0.69    0.37 
  -8   6   5    0.23    0.65 
   8   6  -5    0.14    0.39 
   8   6  -5    0.09    0.42 
   8   6  -5    1.10    0.35 
  -8   6   5    0.09    0.29 
  -8   6   5   -0.46    0.54 
  -7  -6   5    0.11    0.49 
  -7  -6   5    0.28    0.38 
  -7  -6   5    0.81    0.30 
   7  -6  -5    0.53    0.28 
   7   6  -5    0.37    0.30 
   7   6  -5    0.82    0.36 
   7   6  -5    0.40    0.33 
   7   6  -5    0.42    0.28 
  -7   6   5    0.45    0.26 
  -7   6   5    0.87    0.49 
  -7   6   5    0.01    0.42 
   6  -6  -5    1.28    0.27 
   6  -6  -5    1.44    0.44 
  -6  -6   5    1.39    0.31 
  -6  -6   5    1.49    0.26 
  -6  -6   5    1.37    0.45 
   6   6  -5    0.80    0.29 
   6   6  -5    1.15    0.28 
  -6   6   5    1.12    0.34 
   6   6  -5    0.83    0.24 
   6   6  -5    1.10    0.25 
  -6   6   5    0.93    0.38 
   5  -6  -5    2.19    0.25 
  -5  -6   5    2.30    0.17 
   5  -6  -5    1.96    0.41 
  -5  -6   5    1.28    0.21 
  -5  -6   5    1.92    0.39 
   5   6  -5    2.07    0.29 
   5   6  -5    1.85    0.30 
  -5   6   5    2.31    0.31 
   5   6  -5    1.84    0.21 
   5   6  -5    1.94    0.24 
  -5   6   5    2.29    0.25 
   4  -6  -5    4.31    0.46 
  -4  -6   5    2.96    0.30 
  -4  -6   5    3.42    0.29 
  -4  -6   5    3.64    0.43 
  -4  -6   5    3.03    0.18 
   4  -6  -5    3.37    0.30 
  -4   6   5    4.01    0.44 
  -4   6   5    3.08    0.32 
   4   6  -5    3.41    0.35 
   4   6  -5    3.35    0.25 
   4   6  -5    3.33    0.30 
  -4   6   5    3.12    0.31 
   4   6  -5    3.30    0.36 
  -3  -6   5    0.43    0.15 
  -3  -6   5    0.63    0.25 
   3  -6  -5    0.46    0.22 
  -3  -6   5    0.61    0.14 
   3  -6  -5    0.43    0.14 
  -3   6   5    0.38    0.23 
   3   6  -5    0.58    0.21 
   3   6  -5    0.33    0.19 
  -3   6   5    0.69    0.19 
   3   6  -5    0.30    0.12 
   3   6  -5    0.57    0.15 
  -2  -6   5    9.22    0.33 
   2  -6  -5    9.55    0.38 
   2  -6  -5    8.71    0.50 
  -2  -6   5    8.86    0.38 
  -2  -6   5   10.01    0.59 
   2   6  -5    9.57    0.52 
   2   6  -5    9.70    0.32 
  -2   6   5    9.82    0.41 
   2   6  -5    9.65    0.39 
  -2   6   5    8.63    0.54 
   2   6  -5    9.76    0.48 
   1  -6  -5   15.26    0.66 
  -1  -6   5   15.94    0.63 
   1  -6  -5   15.46    0.51 
  -1  -6   5   16.10    0.46 
  -1  -6   5   15.90    0.52 
  -1  -6   5   15.92    0.69 
  -1   6   5   15.91    0.69 
   1   6  -5   16.49    0.45 
  -1   6   5   16.64    0.54 
   1   6  -5   15.82    0.66 
   1   6  -5   15.95    0.53 
   1   6  -5   16.26    0.63 
   0  -6   5    6.45    0.31 
   0  -6   5    6.50    0.25 
   0  -6   5    6.78    0.40 
   0  -6   5    7.44    0.46 
   0  -6  -5    7.49    0.31 
   0  -6  -5    7.13    0.44 
   0  -6  -5    6.63    0.23 
   0   6  -5    7.57    0.45 
   0   6   5    6.09    0.44 
   0   6  -5    6.95    0.40 
   0   6   5    6.67    0.32 
   0   6  -5    7.32    0.33 
   1  -6   5   19.63    0.71 
  -1  -6  -5   19.63    0.58 
   1  -6   5   19.70    0.60 
   1  -6   5   19.44    0.52 
  -1  -6  -5   19.73    0.74 
  -1  -6  -5   19.34    0.51 
   1  -6   5   20.07    0.77 
  -1   6  -5   18.73    0.74 
  -1   6  -5   19.09    0.69 
   1   6   5   19.68    0.75 
  -1   6  -5   19.51    0.60 
   1   6   5   18.57    0.59 
   2  -6   5    3.02    0.31 
  -2  -6  -5    3.44    0.35 
  -2  -6  -5    2.86    0.20 
  -2  -6  -5    2.65    0.20 
   2  -6   5    2.52    0.22 
   2  -6   5    2.87    0.33 
  -2   6  -5    2.87    0.33 
   2   6   5    2.71    0.17 
  -2   6  -5    2.87    0.30 
   2   6   5    2.66    0.22 
   2   6   5    3.22    0.32 
  -2   6  -5    2.68    0.24 
  -3  -6  -5    0.13    0.14 
   3  -6   5    0.04    0.19 
  -3  -6  -5    0.12    0.13 
   3  -6   5   -0.01    0.16 
   3  -6   5    0.32    0.12 
  -3  -6  -5    0.32    0.11 
  -3  -6  -5    0.29    0.19 
   3   6   5    0.18    0.12 
   3   6   5    0.43    0.22 
  -3   6  -5    0.13    0.19 
  -3   6  -5    0.12    0.14 
  -3   6  -5    0.27    0.18 
   3   6   5    0.26    0.11 
   4  -6   5    4.50    0.41 
   4  -6   5    5.66    0.45 
  -4  -6  -5    5.09    0.33 
   4  -6   5    4.65    0.30 
  -4  -6  -5    5.35    0.32 
  -4  -6  -5    5.10    0.28 
  -4  -6  -5    5.17    0.42 
   4   6   5    4.77    0.28 
  -4   6  -5    4.73    0.43 
  -4   6  -5    4.49    0.34 
  -4   6  -5    4.64    0.39 
  -4   6  -5    4.89    0.32 
   4   6   5    4.71    0.29 
   4   6   5    4.21    0.41 
   5  -6   5   -0.28    0.28 
  -5  -6  -5    0.09    0.14 
  -5  -6  -5    0.10    0.26 
  -5  -6  -5   -0.04    0.21 
  -5  -6  -5    0.24    0.19 
   5  -6   5    0.32    0.16 
   5  -6   5    0.03    0.22 
  -5   6  -5    0.03    0.19 
   5   6   5   -0.03    0.17 
  -5   6  -5    0.19    0.21 
   5   6   5   -0.19    0.20 
  -5   6  -5   -0.15    0.28 
   5   6   5    0.01    0.15 
  -5   6  -5    0.04    0.18 
  -6  -6  -5   -0.37    0.25 
   6  -6   5    0.00    0.18 
   6  -6   5    0.42    0.34 
  -6  -6  -5   -0.15    0.20 
  -6   6  -5    0.17    0.24 
  -6   6  -5   -0.01    0.21 
   6   6   5    0.17    0.24 
   6   6   5    0.19    0.18 
  -7  -6  -5    0.40    0.26 
  -7  -6  -5    0.07    0.25 
   7  -6   5   -0.46    0.44 
  -7  -6  -5   -0.07    0.25 
   7  -6   5    0.15    0.22 
  -7   6  -5   -0.22    0.41 
  -7   6  -5    0.36    0.26 
   7   6   5   -0.11    0.19 
  -7   6  -5    0.26    0.34 
   7   6   5   -0.29    0.33 
   7   6   5   -0.02    0.25 
  -8  -6  -5   -0.02    0.31 
   8  -6   5    0.23    0.47 
   8   6   5    0.35    0.31 
  -8   6  -5    0.01    0.32 
   8   6   5    0.23    0.25 
   8   6   5    0.38    0.47 
   8  -7  -5   -0.38    0.68 
   8  -7  -5   -0.38    0.43 
  -8  -7   5    0.22    0.77 
  -8  -7   5    0.35    0.73 
  -8   7   5    0.24    0.33 
   8   7  -5    0.14    0.42 
  -8   7   5    0.38    0.64 
   8   7  -5    0.44    0.46 
   8   7  -5    0.57    0.77 
   8   7  -5   -0.99    0.46 
  -7  -7   5    0.27    0.43 
  -7  -7   5    0.25    0.33 
   7  -7  -5    0.25    0.30 
   7  -7  -5    1.36    0.59 
  -7  -7   5    0.62    0.59 
  -7   7   5   -0.08    0.16 
   7   7  -5    0.34    0.33 
   7   7  -5    0.12    0.32 
  -7   7   5    0.07    0.56 
  -7   7   5    0.44    0.46 
  -7   7   5   -0.02    0.27 
   7   7  -5    0.12    0.41 
  -6  -7   5   -0.12    0.23 
  -6  -7   5    0.00    0.13 
  -6  -7   5    0.41    0.31 
  -6  -7   5    1.00    0.49 
   6  -7  -5    0.13    0.44 
   6  -7  -5    0.51    0.25 
   6   7  -5    0.43    0.36 
  -6   7   5    0.16    0.21 
  -6   7   5    0.29    0.33 
   6   7  -5    0.09    0.30 
   6   7  -5    0.25    0.24 
   6   7  -5   -0.04    0.26 
  -6   7   5    0.22    0.43 
  -5  -7   5    2.57    0.48 
  -5  -7   5    2.60    0.21 
   5  -7  -5    2.52    0.31 
   5  -7  -5    3.23    0.55 
   5   7  -5    2.69    0.26 
   5   7  -5    1.74    0.35 
   5   7  -5    2.07    0.34 
  -5   7   5    2.34    0.36 
   5   7  -5    2.12    0.27 
  -5   7   5    2.74    0.30 
  -4  -7   5    0.25    0.34 
   4  -7  -5    0.26    0.17 
  -4  -7   5    0.02    0.10 
  -4   7   5    0.14    0.24 
   4   7  -5   -0.03    0.26 
  -4   7   5    0.18    0.19 
   4   7  -5    0.06    0.21 
  -3  -7   5    0.21    0.29 
   3  -7  -5    0.14    0.14 
  -3  -7   5   -0.12    0.13 
  -3  -7   5    0.02    0.15 
   3  -7  -5    0.13    0.24 
  -3   7   5   -0.02    0.18 
  -3   7   5   -0.01    0.18 
   3   7  -5   -0.08    0.12 
  -3   7   5    0.28    0.29 
   3   7  -5   -0.16    0.20 
   3   7  -5   -0.01    0.16 
   3   7  -5    0.16    0.23 
   2  -7  -5    0.99    0.27 
   2  -7  -5    0.82    0.16 
  -2  -7   5    1.13    0.17 
  -2  -7   5    1.16    0.31 
  -2  -7   5    1.27    0.17 
  -2   7   5    0.96    0.30 
   2   7  -5    1.04    0.14 
   2   7  -5    0.98    0.19 
   2   7  -5    1.00    0.27 
  -2   7   5    0.98    0.20 
   2   7  -5    0.97    0.23 
   1  -7  -5    0.29    0.23 
   1  -7  -5    0.64    0.14 
  -1  -7   5    0.64    0.13 
  -1  -7   5    0.64    0.27 
  -1  -7   5    0.81    0.15 
   1  -7  -5    0.85    0.11 
  -1   7   5    0.68    0.17 
   1   7  -5    0.91    0.25 
   1   7  -5    0.69    0.21 
   1   7  -5    0.57    0.16 
  -1   7   5    0.63    0.27 
   0  -7  -5    1.30    0.17 
   0  -7  -5    1.10    0.12 
   0  -7  -5    0.98    0.25 
   0  -7   5    0.88    0.16 
   0  -7   5    0.87    0.12 
   0  -7   5    0.98    0.28 
   0   7   5    1.23    0.28 
   0   7  -5    0.94    0.26 
   0   7   5    0.94    0.17 
   0   7  -5    0.86    0.20 
   0   7  -5    1.19    0.18 
   1  -7   5   18.31    0.60 
   1  -7   5   17.74    0.72 
   1  -7   5   18.29    0.78 
  -1  -7  -5   18.74    0.78 
   1  -7   5   18.03    0.51 
  -1  -7  -5   17.86    0.57 
  -1  -7  -5   17.77    0.50 
  -1   7  -5   18.34    0.61 
   1   7   5   18.97    0.80 
   1   7   5   18.19    0.59 
  -1   7  -5   17.63    0.78 
  -1   7  -5   18.02    0.72 
  -2  -7  -5    0.03    0.20 
   2  -7   5    0.06    0.13 
  -2  -7  -5   -0.04    0.10 
  -2  -7  -5    0.25    0.12 
   2  -7   5   -0.15    0.17 
   2  -7   5   -0.02    0.22 
  -2   7  -5    0.12    0.23 
   2   7   5   -0.05    0.22 
  -2   7  -5    0.01    0.15 
   2   7   5    0.02    0.14 
  -2   7  -5    0.00    0.20 
   2   7   5    0.06    0.10 
   3  -7   5   16.40    0.58 
   3  -7   5   17.15    0.71 
  -3  -7  -5   17.29    0.56 
  -3  -7  -5   16.82    0.75 
   3  -7   5   17.52    0.79 
  -3  -7  -5   17.08    0.53 
  -3  -7  -5   16.94    0.55 
  -3   7  -5   16.68    0.60 
  -3   7  -5   16.58    0.69 
   3   7   5   16.55    0.57 
   3   7   5   16.24    0.74 
   3   7   5   16.88    0.50 
  -4  -7  -5    5.65    0.52 
   4  -7   5    4.88    0.47 
  -4  -7  -5    6.15    0.34 
  -4  -7  -5    6.08    0.39 
  -4  -7  -5    5.63    0.36 
   4  -7   5    6.28    0.37 
  -4   7  -5    5.65    0.41 
   4   7   5    5.81    0.35 
   4   7   5    6.09    0.33 
  -4   7  -5    6.37    0.58 
   4   7   5    6.65    0.51 
  -4   7  -5    5.74    0.46 
   5  -7   5   -0.17    0.18 
  -5  -7  -5    0.23    0.28 
  -5  -7  -5    0.03    0.19 
  -5  -7  -5    0.31    0.26 
  -5  -7  -5   -0.18    0.15 
   5  -7   5    0.25    0.29 
   5   7   5    0.19    0.18 
  -5   7  -5    0.44    0.25 
  -5   7  -5    0.08    0.23 
   5   7   5    0.16    0.25 
  -5   7  -5   -0.02    0.20 
  -6  -7  -5    0.40    0.31 
  -6  -7  -5   -0.26    0.33 
  -6  -7  -5    0.69    0.24 
   6  -7   5    0.10    0.45 
   6  -7   5    0.52    0.24 
  -6   7  -5    0.48    0.39 
  -6   7  -5    0.45    0.28 
  -6   7  -5    0.12    0.26 
  -6   7  -5   -0.08    0.29 
   6   7   5   -0.17    0.25 
   6   7   5    0.02    0.21 
   6   7   5   -0.24    0.27 
  -7  -7  -5    0.44    0.30 
  -7  -7  -5    1.08    0.37 
   7  -7   5    0.94    0.58 
   7  -7   5    0.60    0.28 
  -7  -7  -5    0.66    0.31 
  -7   7  -5    0.27    0.40 
  -7   7  -5   -0.51    0.51 
   7   7   5    0.55    0.36 
   7   7   5    0.31    0.33 
   7   7   5    0.97    0.53 
  -7   7  -5    0.02    0.30 
   7   7   5    0.34    0.25 
  -7   7  -5    0.30    0.30 
  -7  -8   5    1.12    0.40 
  -7  -8   5    0.45    0.67 
  -7  -8   5    0.48    0.52 
  -7  -8   5    0.18    0.20 
   7  -8  -5    0.84    0.67 
   7  -8  -5    0.33    0.36 
  -7   8   5    0.52    0.73 
  -7   8   5   -0.04    0.53 
  -7   8   5    0.38    0.30 
  -7   8   5    0.17    0.27 
   7   8  -5    0.85    0.40 
   7   8  -5    0.88    0.40 
   7   8  -5    0.05    0.47 
   7   8  -5    0.66    0.51 
  -6  -8   5    3.71    0.42 
   6  -8  -5    4.58    0.72 
   6  -8  -5    3.87    0.40 
  -6  -8   5    3.72    0.43 
  -6  -8   5    3.74    0.68 
  -6   8   5    4.59    0.73 
   6   8  -5    3.42    0.39 
   6   8  -5    3.43    0.54 
  -6   8   5    3.68    0.52 
   6   8  -5    3.54    0.37 
   6   8  -5    4.25    0.49 
  -5  -8   5    0.30    0.14 
   5  -8  -5    0.76    0.47 
  -5  -8   5    0.52    0.24 
  -5  -8   5    0.75    0.47 
   5  -8  -5    0.41    0.29 
  -5  -8   5    0.67    0.30 
  -5   8   5    0.65    0.28 
  -5   8   5    0.52    0.34 
   5   8  -5    0.55    0.24 
   5   8  -5    1.02    0.36 
   5   8  -5    0.55    0.35 
   5   8  -5    0.58    0.27 
   4  -8  -5   11.68    0.55 
   4  -8  -5   11.70    0.85 
  -4  -8   5   12.40    0.85 
  -4  -8   5   11.29    0.39 
   4   8  -5   11.48    0.47 
   4   8  -5   11.15    0.76 
  -4   8   5   12.32    0.64 
   4   8  -5   11.55    0.56 
  -4   8   5   12.01    0.63 
   4   8  -5   11.74    0.68 
   3  -8  -5    0.13    0.32 
  -3  -8   5    0.28    0.37 
   3  -8  -5   -0.44    0.15 
  -3   8   5   -0.10    0.22 
   3   8  -5   -0.25    0.25 
   3   8  -5    0.04    0.16 
   3   8  -5    0.11    0.30 
   3   8  -5    0.08    0.22 
  -3   8   5   -0.02    0.23 
  -3   8   5    0.33    0.34 
   2  -8  -5   -0.17    0.14 
  -2  -8   5   -0.06    0.32 
   2  -8  -5    0.16    0.26 
  -2   8   5    0.01    0.31 
  -2   8   5    0.11    0.20 
   2   8  -5   -0.02    0.27 
   2   8  -5   -0.45    0.33 
   2   8  -5   -0.03    0.13 
   2   8  -5   -0.05    0.17 
   1  -8  -5   13.30    0.41 
  -1  -8   5   13.42    0.76 
   1  -8  -5   12.29    0.71 
  -1  -8   5   13.06    0.45 
  -1  -8   5   12.85    0.53 
   1  -8  -5   12.90    0.51 
   1   8  -5   13.55    0.55 
  -1   8   5   12.73    0.55 
  -1   8   5   13.01    0.75 
   1   8  -5   13.78    0.72 
   1   8  -5   14.08    0.66 
   0  -8  -5    5.82    0.33 
   0  -8   5    5.76    0.36 
   0  -8   5    5.20    0.54 
   0  -8  -5    6.02    0.53 
   0  -8   5    5.72    0.29 
   0  -8  -5    5.27    0.27 
   0   8  -5    6.15    0.38 
   0   8  -5    6.07    0.45 
   0   8  -5    5.44    0.54 
   0   8   5    5.77    0.37 
   0   8   5    5.58    0.56 
  -1  -8  -5   33.59    1.17 
   1  -8   5   30.69    0.96 
   1  -8   5   32.37    0.95 
   1  -8   5   32.05    1.18 
  -1  -8  -5   33.19    0.84 
  -1   8  -5   32.60    0.95 
  -1   8  -5   30.69    1.28 
  -1   8  -5   31.13    1.08 
   1   8   5   32.49    1.17 
   1   8   5   32.23    0.94 
  -2  -8  -5   15.34    0.51 
   2  -8   5   14.59    0.89 
   2  -8   5   15.37    0.49 
  -2  -8  -5   15.86    0.55 
  -2  -8  -5   15.61    0.77 
   2  -8   5   15.42    0.59 
  -2   8  -5   15.78    0.71 
   2   8   5   16.38    0.58 
   2   8   5   14.84    0.78 
  -2   8  -5   16.27    0.61 
   3  -8   5   10.54    0.71 
   3  -8   5   11.08    0.49 
  -3  -8  -5   10.19    0.68 
  -3  -8  -5   10.37    0.45 
  -3  -8  -5   10.00    0.44 
  -3  -8  -5   10.50    0.45 
   3   8   5   10.20    0.39 
   3   8   5   10.18    0.69 
   3   8   5   10.00    0.48 
  -3   8  -5   10.98    0.62 
  -3   8  -5   10.39    0.52 
   4  -8   5    0.03    0.31 
  -4  -8  -5    0.15    0.19 
  -4  -8  -5    0.06    0.22 
  -4  -8  -5    0.34    0.34 
   4  -8   5    0.22    0.21 
   4   8   5   -0.29    0.29 
   4   8   5   -0.06    0.20 
  -4   8  -5    0.06    0.33 
   4   8   5    0.17    0.18 
  -4   8  -5    0.49    0.26 
  -4   8  -5    0.19    0.30 
  -5  -8  -5    1.57    0.28 
  -5  -8  -5    1.74    0.24 
   5  -8   5    1.39    0.25 
   5  -8   5    1.45    0.39 
  -5  -8  -5    0.32    0.37 
  -5   8  -5    1.45    0.44 
  -5   8  -5    1.46    0.35 
   5   8   5    1.67    0.28 
   5   8   5    1.92    0.27 
   5   8   5    1.49    0.40 
  -6  -8  -5    0.52    0.27 
  -6  -8  -5    0.46    0.26 
   6  -8   5    0.20    0.27 
  -6  -8  -5    0.45    0.41 
  -6  -8  -5    0.53    0.41 
   6  -8   5    0.90    0.48 
  -6   8  -5   -0.62    0.49 
   6   8   5   -0.30    0.30 
  -6   8  -5   -0.05    0.33 
   6   8   5    0.16    0.27 
   6   8   5   -0.39    0.31 
  -6   8  -5    0.02    0.30 
  -6   8  -5   -0.36    0.35 
   7  -8   5    7.22    0.88 
  -7  -8  -5    4.79    0.41 
   7  -8   5    5.60    0.68 
  -7  -8  -5    4.92    0.65 
  -7  -8  -5    5.01    0.44 
   7   8   5    4.71    0.41 
  -7   8  -5    4.45    0.46 
   7   8   5    5.39    0.50 
   7   8   5    6.53    0.77 
  -7   8  -5    4.05    0.73 
  -7  -9   5    0.43    0.84 
   7  -9  -5    0.28    0.45 
   7  -9  -5   -0.12    0.88 
   7   9  -5    0.02    0.47 
   7   9  -5   -0.84    0.67 
   7   9  -5    0.21    0.45 
   7   9  -5    0.16    0.63 
  -7   9   5    0.27    0.62 
   6  -9  -5    4.33    0.80 
   6  -9  -5    4.86    0.46 
  -6  -9   5    4.45    0.47 
  -6  -9   5    4.54    0.52 
  -6   9   5    5.32    0.79 
   6   9  -5    5.98    0.63 
   6   9  -5    5.13    0.44 
   6   9  -5    5.17    0.67 
  -6   9   5    5.38    0.62 
   6   9  -5    6.33    0.65 
  -5  -9   5    4.83    0.43 
   5  -9  -5    4.43    0.42 
  -5  -9   5    4.36    0.44 
   5  -9  -5    5.15    0.71 
  -5  -9   5    5.11    0.75 
   5   9  -5    4.96    0.37 
  -5   9   5    4.61    0.52 
   5   9  -5    5.46    0.64 
   5   9  -5    5.26    0.57 
  -5   9   5    4.30    0.46 
  -5   9   5    5.94    0.76 
   5   9  -5    4.88    0.52 
   4  -9  -5    0.06    0.23 
  -4  -9   5    0.10    0.27 
  -4  -9   5    0.48    0.48 
   4  -9  -5    0.80    0.45 
  -4   9   5   -0.17    0.42 
   4   9  -5    0.49    0.36 
  -4   9   5   -0.21    0.36 
   4   9  -5    0.11    0.26 
   4   9  -5    0.73    0.41 
   4   9  -5    0.37    0.22 
  -3  -9   5    0.87    0.45 
   3  -9  -5    1.02    0.25 
   3  -9  -5    0.87    0.35 
  -3   9   5    1.21    0.44 
  -3   9   5    0.47    0.34 
   3   9  -5    1.08    0.40 
   3   9  -5    1.27    0.35 
   3   9  -5    0.79    0.20 
   3   9  -5    0.83    0.26 
  -2  -9   5    5.57    0.41 
   2  -9  -5    5.57    0.41 
   2  -9  -5    5.27    0.30 
  -2  -9   5    5.52    0.59 
   2   9  -5    4.83    0.52 
   2   9  -5    5.52    0.45 
  -2   9   5    6.52    0.57 
  -2   9   5    5.56    0.60 
   1  -9  -5    1.17    0.36 
  -1  -9   5    1.59    0.24 
   1  -9  -5    1.03    0.22 
  -1  -9   5    0.76    0.38 
   1  -9  -5    1.17    0.16 
   1   9  -5    1.44    0.26 
   1   9  -5    1.14    0.37 
  -1   9   5    1.86    0.42 
   0  -9  -5   16.54    0.86 
   0  -9  -5   16.33    0.51 
   0  -9   5   16.30    0.64 
   0   9   5   15.66    0.63 
   0   9  -5   16.03    0.64 
   0   9  -5   14.70    0.75 
   0   9  -5   15.30    0.85 
   0   9   5   16.22    0.89 
  -1  -9  -5    8.30    0.37 
   1  -9   5    7.93    0.45 
   1  -9   5    9.01    0.70 
  -1  -9  -5    7.67    0.66 
  -1   9  -5    8.50    0.48 
   1   9   5    7.30    0.73 
  -1   9  -5    7.29    0.59 
   1   9   5    7.20    0.45 
  -1   9  -5    6.24    0.64 
  -2  -9  -5    0.19    0.35 
  -2  -9  -5    0.11    0.18 
   2  -9   5   -0.26    0.31 
   2  -9   5    0.37    0.20 
  -2   9  -5   -0.39    0.26 
  -2   9  -5    0.19    0.22 
   2   9   5   -0.44    0.32 
   2   9   5    0.15    0.20 
  -3  -9  -5   -0.06    0.18 
   3  -9   5   -0.25    0.18 
  -3  -9  -5    0.20    0.22 
   3  -9   5   -0.22    0.33 
  -3  -9  -5   -0.10    0.35 
   3   9   5    0.31    0.37 
  -3   9  -5    0.01    0.38 
  -3   9  -5   -0.17    0.24 
   3   9   5    0.16    0.17 
   3   9   5   -0.10    0.19 
  -3   9  -5    0.20    0.30 
  -4  -9  -5    5.69    0.43 
   4  -9   5    5.13    0.46 
  -4  -9  -5    5.88    0.41 
   4  -9   5    4.49    0.56 
   4   9   5    5.73    0.60 
  -4   9  -5    6.25    0.57 
   4   9   5    5.14    0.46 
  -4   9  -5    4.74    0.60 
  -4   9  -5    5.72    0.62 
   4   9   5    4.97    0.39 
  -5  -9  -5    1.33    0.37 
   5  -9   5    0.89    0.46 
  -5  -9  -5    1.49    0.29 
  -5  -9  -5    0.39    0.44 
   5  -9   5    0.90    0.32 
  -5  -9  -5    0.58    0.27 
  -5   9  -5    1.31    0.54 
  -5   9  -5    0.76    0.30 
   5   9   5    1.10    0.30 
   5   9   5    0.97    0.46 
  -5   9  -5    0.38    0.37 
   5   9   5    1.29    0.28 
  -5   9  -5    0.25    0.34 
   6  -9   5    1.99    0.64 
  -6  -9  -5    0.98    0.34 
  -6  -9  -5    1.24    0.50 
  -6  -9  -5    0.80    0.53 
   6  -9   5    0.57    0.36 
  -6  -9  -5    1.05    0.30 
  -6   9  -5    0.25    0.40 
   6   9   5    0.76    0.34 
   6   9   5    2.09    0.65 
  -6   9  -5    0.31    0.45 
   6   9   5    1.17    0.48 
  -6   9  -5    1.02    0.66 
  -6   9  -5    1.23    0.35 
   6   9   5    1.19    0.36 
  -6 -10   5    0.47    0.24 
   6 -10  -5    0.71    0.44 
  -6 -10   5    1.09    0.94 
   6 -10  -5    2.02    0.91 
   6  10  -5   -0.05    0.58 
  -6  10   5    0.51    0.63 
   6  10  -5    0.87    0.44 
  -6  10   5   -0.16    0.45 
   6  10  -5    0.62    0.43 
   6  10  -5   -0.73    0.63 
   5 -10  -5    3.73    0.47 
  -5 -10   5    4.18    1.00 
  -5 -10   5    3.56    0.49 
  -5 -10   5    3.10    0.47 
   5 -10  -5    4.34    0.82 
  -5  10   5    4.79    0.63 
   5  10  -5    3.22    0.36 
  -5  10   5    3.95    0.80 
   5  10  -5    3.54    0.59 
   5  10  -5    3.49    0.65 
  -5  10   5    2.91    0.55 
   5  10  -5    3.36    0.44 
  -4 -10   5   -0.23    0.29 
   4 -10  -5    0.49    0.29 
   4 -10  -5    0.96    0.54 
  -4 -10   5    0.19    0.32 
  -4 -10   5    0.20    0.59 
  -4  10   5    0.13    0.38 
   4  10  -5    0.17    0.31 
  -4  10   5   -0.36    0.54 
   4  10  -5   -0.02    0.52 
   4  10  -5    0.03    0.25 
   4  10  -5    0.41    0.42 
   3 -10  -5    3.84    0.55 
   3 -10  -5    3.41    0.37 
  -3 -10   5    2.93    0.36 
  -3 -10   5    3.63    0.62 
  -3 -10   5    3.51    0.35 
   3  10  -5    3.06    0.37 
  -3  10   5    3.16    0.45 
   3  10  -5    3.36    0.50 
  -3  10   5    2.77    0.63 
   3  10  -5    2.80    0.53 
   3  10  -5    2.94    0.27 
  -2 -10   5    0.78    0.47 
  -2 -10   5    1.04    0.28 
   2 -10  -5    0.82    0.27 
   2 -10  -5    0.72    0.43 
  -2 -10   5    1.42    0.30 
  -2  10   5    1.02    0.32 
   2  10  -5    1.19    0.36 
   2  10  -5    0.63    0.45 
   2  10  -5    0.91    0.31 
  -2  10   5    1.48    0.52 
   1 -10  -5   32.15    1.34 
  -1 -10   5   34.03    1.05 
  -1 -10   5   32.38    1.37 
   1 -10  -5   32.84    1.02 
  -1  10   5   32.84    1.39 
   1  10  -5   32.39    1.05 
   1  10  -5   32.22    1.32 
  -1  10   5   31.09    1.07 
   0 -10  -5    0.65    0.19 
   0 -10   5    0.76    0.24 
   0 -10  -5    0.85    0.37 
   0 -10  -5    0.67    0.22 
   0 -10   5    1.22    0.44 
   0  10  -5    0.18    0.41 
   0  10   5    1.43    0.36 
   0  10   5    0.59    0.27 
   0  10  -5    0.51    0.27 
   0  10   5    0.65    0.52 
   0  10  -5    0.68    0.33 
   1 -10   5    2.80    0.46 
   1 -10   5    4.23    0.44 
  -1 -10  -5    4.30    0.36 
  -1 -10  -5    4.30    0.56 
  -1  10  -5    4.55    0.57 
   1  10   5    3.99    0.37 
   1  10   5    3.43    0.52 
  -1  10  -5    3.81    0.47 
  -2 -10  -5    0.39    0.25 
  -2 -10  -5    1.24    0.46 
   2 -10   5    0.53    0.18 
   2 -10   5    1.08    0.45 
   2 -10   5    0.71    0.26 
  -2 -10  -5    0.94    0.22 
   2  10   5    0.59    0.42 
   2  10   5    0.62    0.27 
  -2  10  -5   -0.02    0.44 
  -2  10  -5    0.52    0.30 
  -2  10  -5    0.21    0.37 
   3 -10   5    4.33    0.62 
  -3 -10  -5    3.56    0.35 
   3 -10   5    3.24    0.28 
  -3 -10  -5    3.40    0.57 
   3  10   5    3.98    0.65 
  -3  10  -5    3.85    0.51 
  -3  10  -5    4.65    0.61 
  -3  10  -5    4.18    0.46 
   3  10   5    2.90    0.37 
   4 -10   5    0.00    0.44 
  -4 -10  -5    0.38    0.24 
  -4 -10  -5   -0.17    0.27 
  -4 -10  -5    0.24    0.48 
  -4 -10  -5   -0.20    0.34 
   4 -10   5    0.27    0.32 
   4  10   5    0.40    0.24 
   4  10   5    0.00    0.50 
   4  10   5    0.25    0.48 
   4  10   5    0.17    0.29 
  -4  10  -5    0.02    0.58 
  -4  10  -5    0.30    0.37 
  -4  10  -5   -0.05    0.40 
  -5 -10  -5    0.34    0.33 
   5 -10   5    0.25    0.34 
  -5 -10  -5    0.56    0.44 
   5 -10   5    1.46    0.58 
  -5 -10  -5    0.08    0.55 
  -5 -10  -5    1.10    0.31 
  -5  10  -5    0.54    0.45 
   5  10   5    0.60    0.36 
  -5  10  -5   -0.09    0.43 
   5  10   5    0.75    0.54 
  -5  10  -5    0.88    0.66 
   5  10   5    1.42    0.66 
   5  10   5    0.33    0.31 
   5 -11  -5    0.44    0.46 
   5 -11  -5   -0.04    0.83 
  -5 -11   5   -0.21    0.24 
  -5 -11   5    1.40    0.83 
  -5  11   5    1.43    0.58 
   5  11  -5    0.30    0.63 
   5  11  -5    0.14    0.38 
  -5  11   5    0.18    0.58 
   5  11  -5    0.11    0.47 
   5  11  -5   -0.07    0.70 
  -4 -11   5   -0.04    0.39 
   4 -11  -5    1.99    0.73 
  -4 -11   5    0.14    0.67 
   4 -11  -5   -0.13    0.36 
  -4 -11   5    0.26    0.36 
   4  11  -5    0.99    0.62 
   4  11  -5   -0.21    0.39 
   4  11  -5    0.33    0.30 
  -4  11   5    0.27    0.50 
   4  11  -5    0.10    0.51 
  -4  11   5   -0.39    0.75 
  -4  11   5    0.33    0.50 
  -3 -11   5    1.69    0.37 
   3 -11  -5    0.60    0.36 
   3 -11  -5    0.92    0.25 
  -3 -11   5    0.92    0.61 
  -3 -11   5    0.59    0.32 
   3 -11  -5    1.82    0.58 
  -3  11   5    0.65    0.71 
  -3  11   5    1.20    0.46 
  -3  11   5    1.13    0.48 
   3  11  -5    1.01    0.37 
   3  11  -5    0.75    0.50 
   3  11  -5    0.27    0.54 
  -2 -11   5    0.81    0.33 
   2 -11  -5   -0.19    0.27 
   2 -11  -5    0.68    0.51 
  -2 -11   5    0.54    0.31 
  -2 -11   5    0.30    0.56 
   2 -11  -5    0.14    0.23 
  -2  11   5    0.34    0.38 
  -2  11   5    1.06    0.42 
   2  11  -5   -0.47    0.47 
  -2  11   5    0.46    0.65 
   2  11  -5    0.48    0.43 
   2  11  -5    0.33    0.34 
  -1 -11   5    1.35    0.30 
  -1 -11   5    1.09    0.32 
   1 -11  -5    0.76    0.47 
  -1 -11   5    1.41    0.56 
   1 -11  -5    1.05    0.29 
   1 -11  -5    1.27    0.25 
  -1  11   5    0.66    0.42 
  -1  11   5    1.00    0.36 
   1  11  -5    1.26    0.44 
  -1  11   5    1.15    0.59 
   1  11  -5    1.84    0.54 
   1  11  -5    1.24    0.36 
   0 -11  -5    1.30    0.26 
   0 -11   5    1.52    0.32 
   0 -11  -5    2.04    0.29 
   0 -11  -5    1.77    0.51 
   0 -11   5    0.91    0.54 
   0 -11   5    1.79    0.28 
   0  11   5    1.00    0.54 
   0  11  -5    1.31    0.35 
   0  11  -5    2.22    0.44 
   0  11   5    2.53    0.51 
   0  11  -5    2.28    0.60 
   0  11   5    1.49    0.34 
   1 -11   5    8.92    0.90 
   1 -11   5    7.18    0.48 
  -1 -11  -5    7.52    0.54 
  -1 -11  -5    7.40    0.50 
   1 -11   5    7.25    0.58 
  -1  11  -5    7.20    0.63 
  -1  11  -5    7.78    0.79 
   1  11   5    6.32    0.77 
  -1  11  -5    8.12    0.82 
   1  11   5    7.10    0.58 
   1  11   5    7.13    0.72 
  -2 -11  -5    3.26    0.38 
   2 -11   5    3.16    0.32 
  -2 -11  -5    3.19    0.36 
  -2 -11  -5    3.54    0.64 
   2 -11   5    3.23    0.43 
   2 -11   5    3.37    0.60 
  -2  11  -5    3.75    0.47 
   2  11   5    2.80    0.39 
   2  11   5    4.06    1.15 
   2  11   5    4.09    0.54 
  -2  11  -5    3.10    0.52 
  -2  11  -5    2.09    0.61 
  -3 -11  -5    1.93    0.61 
   3 -11   5    2.79    0.32 
  -3 -11  -5    3.68    0.41 
   3 -11   5    3.33    0.61 
   3 -11   5    3.26    0.41 
  -3 -11  -5    2.73    0.38 
  -3  11  -5    3.85    0.52 
  -3  11  -5    3.20    0.54 
  -3  11  -5    3.30    0.71 
   3  11   5    3.04    0.60 
   3  11   5    2.75    0.42 
   3  11   5    3.25    0.71 
  -4 -11  -5    0.68    0.41 
  -4 -11  -5    0.03    0.28 
   4 -11   5   -0.37    0.37 
   4 -11   5   -0.76    0.51 
  -4 -11  -5    0.56    0.63 
  -4 -11  -5   -0.09    0.35 
   4  11   5   -0.80    0.57 
  -4  11  -5    0.60    0.51 
   4  11   5   -0.17    0.38 
   4  11   5    0.84    0.66 
  -4  11  -5   -0.28    0.47 
   5 -11   5    0.95    0.77 
  -5 -11  -5    1.20    0.56 
  -5 -11  -5    1.20    0.36 
   5 -11   5    1.84    0.49 
   5  11   5    1.24    0.46 
  -5  11  -5    0.43    0.56 
   5  11   5    1.31    0.80 
   5  11   5    1.26    0.38 
  -5  11  -5    1.62    0.60 
   4 -12  -5    2.22    0.83 
  -4 -12   5   -0.07    0.88 
   4 -12  -5    0.38    0.49 
   4  12  -5    0.32    0.47 
  -4  12   5    0.90    0.65 
  -4  12   5    1.23    0.66 
   4  12  -5    1.22    0.81 
   3 -12  -5    1.67    0.42 
   3 -12  -5    1.04    0.32 
   3 -12  -5    2.21    0.69 
  -3 -12   5    1.81    0.85 
  -3 -12   5    1.19    0.68 
  -3 -12   5    1.13    0.52 
  -3  12   5    0.63    0.54 
   3  12  -5    0.63    0.47 
  -3  12   5    1.49    0.60 
   3  12  -5    1.54    0.62 
   3  12  -5    1.06    0.78 
  -3  12   5    3.49    0.93 
   2 -12  -5    1.60    0.43 
  -2 -12   5    2.32    0.77 
  -2 -12   5    3.26    0.45 
   2 -12  -5    2.19    0.33 
   2 -12  -5    1.26    0.66 
  -2 -12   5    2.60    0.42 
  -2  12   5    2.18    0.51 
   2  12  -5    2.31    0.47 
  -2  12   5    2.94    0.83 
   2  12  -5    2.83    0.71 
  -2  12   5    2.16    0.62 
   2  12  -5    1.31    0.56 
   1 -12  -5    0.54    0.31 
  -1 -12   5   -0.06    0.68 
   1 -12  -5    0.46    0.57 
  -1 -12   5    0.56    0.36 
   1 -12  -5    0.63    0.36 
  -1 -12   5    0.31    0.35 
   1  12  -5    0.95    0.44 
  -1  12   5    1.22    0.54 
   1  12  -5    0.43    0.53 
  -1  12   5    0.21    0.79 
   1  12  -5    0.71    0.67 
  -1  12   5    0.71    0.43 
   0 -12   5    1.07    0.39 
   0 -12   5    0.52    0.32 
   0 -12  -5    0.57    0.31 
   0 -12  -5   -0.22    0.57 
   0 -12  -5    0.49    0.34 
   0 -12   5    2.13    0.72 
   0  12  -5    0.97    0.42 
   0  12  -5    0.06    0.67 
   0  12   5    0.31    0.70 
   0  12   5    0.65    0.42 
   0  12  -5    0.14    0.49 
   0  12   5    0.34    0.49 
   1 -12   5    1.17    0.43 
   1 -12   5    1.97    0.36 
  -1 -12  -5    2.40    0.39 
  -1 -12  -5    2.67    0.65 
   1 -12   5    1.37    0.68 
  -1 -12  -5    1.98    0.37 
  -1  12  -5    2.29    0.49 
  -1  12  -5    2.15    0.69 
  -1  12  -5    2.47    0.62 
   1  12   5    3.29    0.71 
   1  12   5    1.60    0.43 
   1  12   5    0.30    0.54 
   2 -12   5    0.83    0.35 
   2 -12   5    1.69    0.65 
  -2 -12  -5    1.02    0.39 
  -2 -12  -5    0.72    0.38 
  -2 -12  -5    0.36    0.70 
   2 -12   5    1.49    0.44 
   2  12   5    0.75    0.42 
  -2  12  -5    1.09    0.64 
  -2  12  -5    1.15    0.52 
   2  12   5    0.72    0.56 
  -2  12  -5    1.47    0.73 
   2  12   5    2.38    0.82 
   3 -12   5    2.32    0.52 
  -3 -12  -5    2.28    0.48 
   3 -12   5    2.38    0.69 
  -3 -12  -5    0.15    0.79 
   3  12   5    2.56    0.76 
   3  12   5    2.25    0.47 
  -3  12  -5    2.54    0.59 
  -3  12  -5    3.20    0.72 
   2 -13  -5   -0.84    0.73 
  -2 -13   5   -1.83    0.83
[truncated: 835,386 more chars]
